# Supplementary material for: Genome-Wide Circular RNA Expression Patterns Reflect Resistance to Immunomodulatory Drugs in Multiple Myeloma Cells
Source: MDPI journal article supplement (doi:10.3390/cancers13030365), 2021-01-20
Supplement: s1 [file s1]

# Supplementary materials: Genome-Wide Circular RNA Expression Patterns Reflect Resistance to Immunomodulatory Drugs in Multiple Myeloma Cells

Theresa Jakobsen, Mette Dahl, Konstantinos Dimopoulos, Kirsten Grønbaek, Jørgen Kjems and Lasse Sommer Kristensen

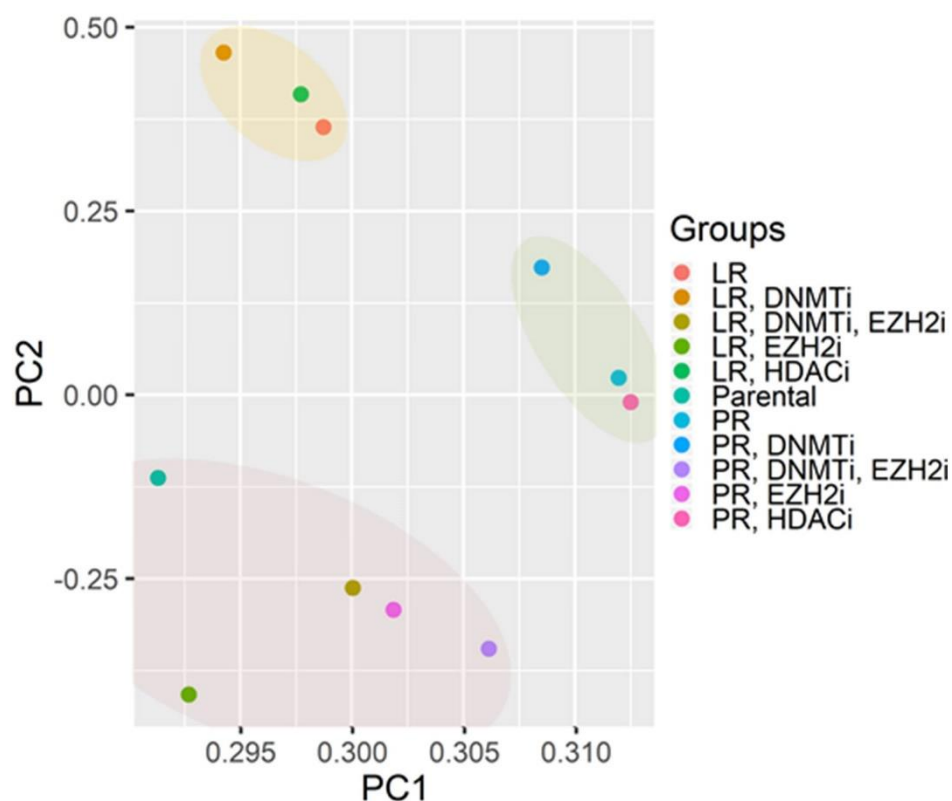

**Figure S1.** Principal component analysis (PCA) of all 6,368 circRNAs detected in the 11 samples (analyzed by RNA-Seq).

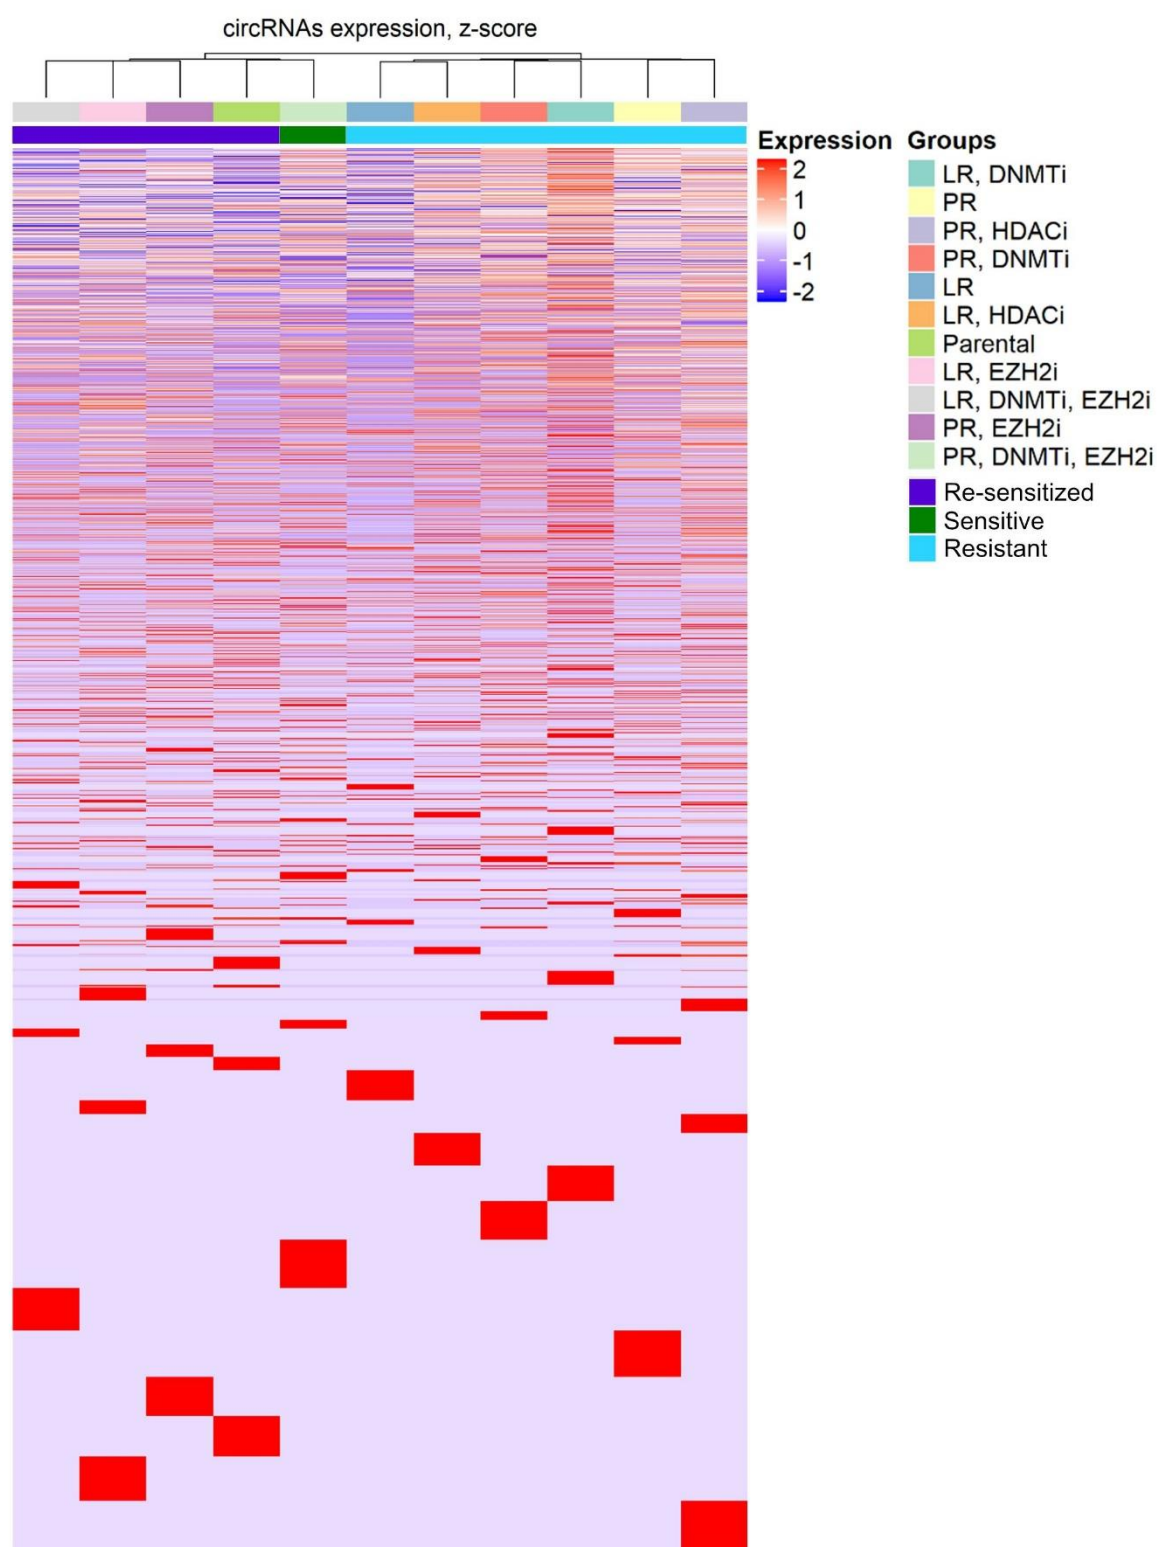

**Figure S2.** Heatmap showing expression and unsupervised clustering of all 6,368 circRNAs detected in the 11 samples (analyzed by RNA-Seq).

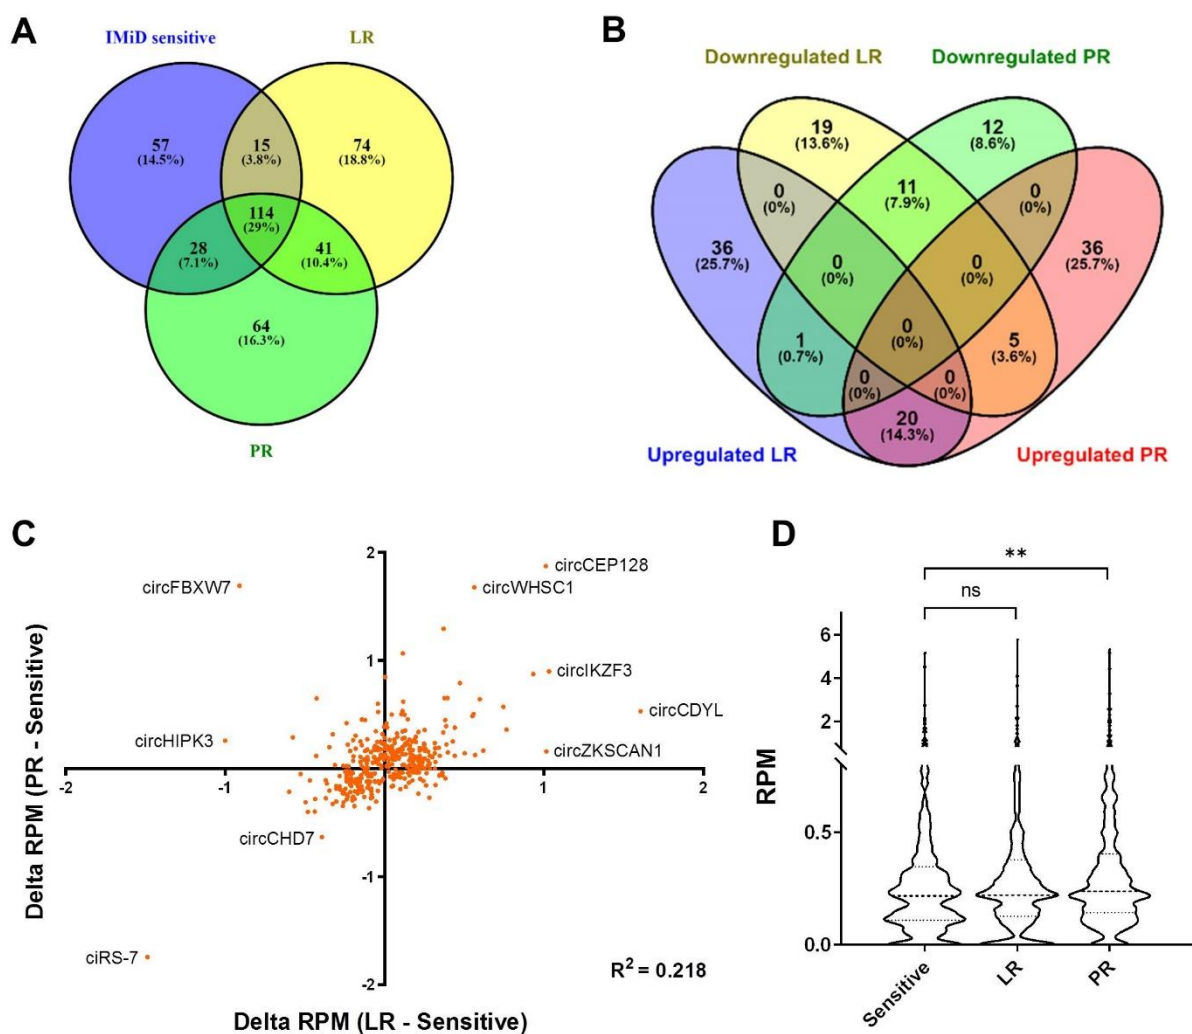

**Figure S3.** Comparison of circRNA expression changes in LR vs PR cells. **(A)** Venn diagram illustrating the overlap of high abundance circRNAs (with RPM > 0.2) detected in parental (IMiD sensitive), LR and PR cells. **(B)** Venn diagram illustrating the overlap between up- and down-regulated circRNAs in LR and PR. **(C)** Scatter plot showing the up- and down-regulated circRNAs in LR and PR plotted against each other, with corresponding  $R^2$  value. **(D)** Violin plot showing all circRNAs expressed in parental (sensitive), LR and PR cells, in RPM, \*\*p < 0.01 (Mann-Whitney test). LR, lenalidomide-resistant, PR, pomalidomide-resistant.

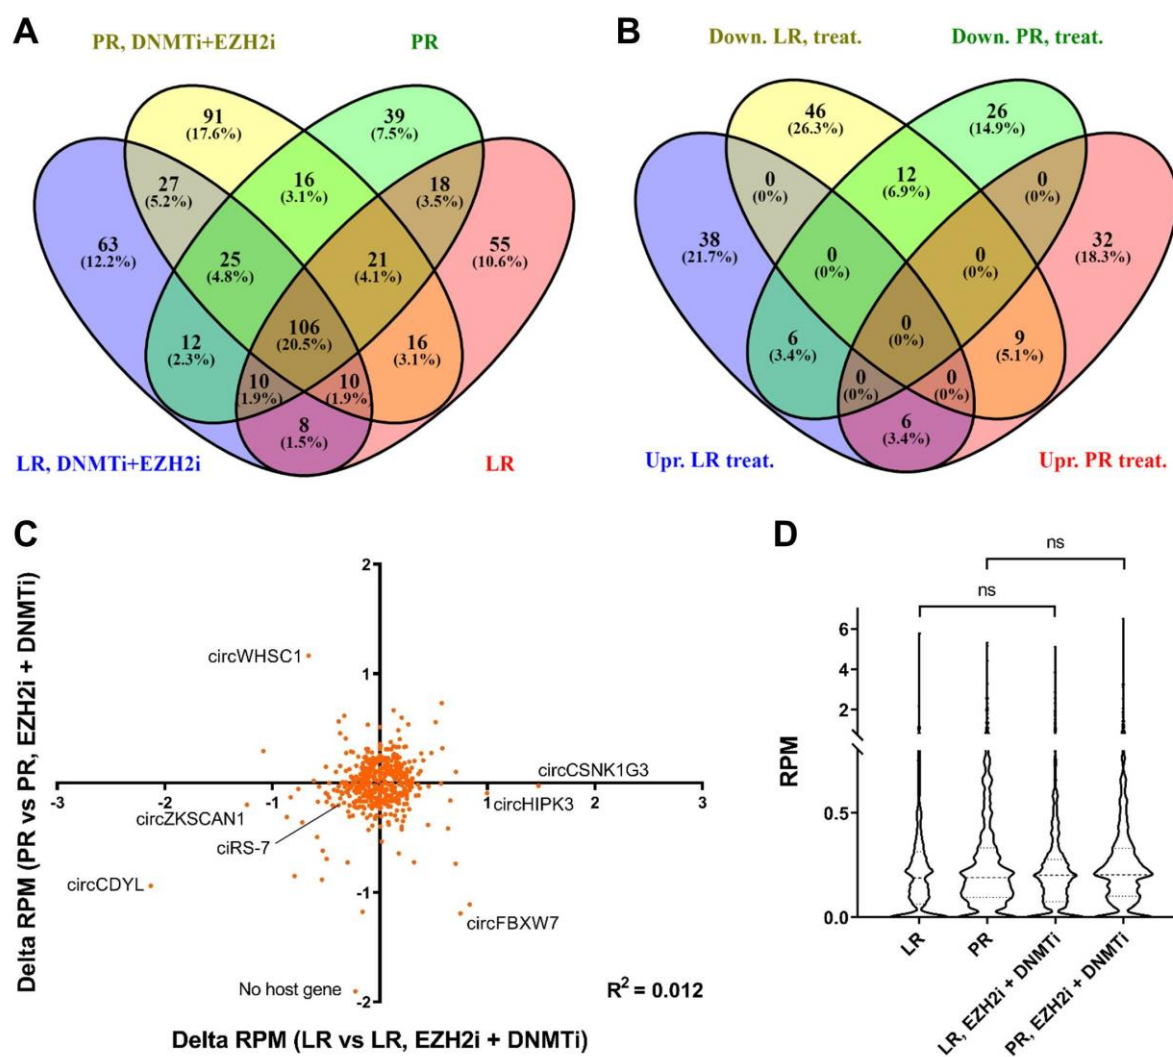

**Figure S4.** CircRNA expression changes upon combined DNMT and EZH2 inhibition. **(A+B)** Venn diagrams illustrating the overlap between circRNAs expressed in LR, LR-treat, PR and PR-treat **(A)** and the up- and downregulated circRNAs in LR-treat and PR-treat **(B)**. **(C)** Scatter plot showing the up- and downregulated circRNAs in LR-treat and PR-treat plotted against each other. **(D)** Violin plot showing the overall expression of circRNAs in RPM. LR, lenalidomide-resistant, PR, pomalidomide-resistant, Down., downregulated, Upr., upregulated, LR-treat, LR cells treated with EZH2i and DNMTi. PR-treat, PR cells treated with EZH2i and DNMTi.

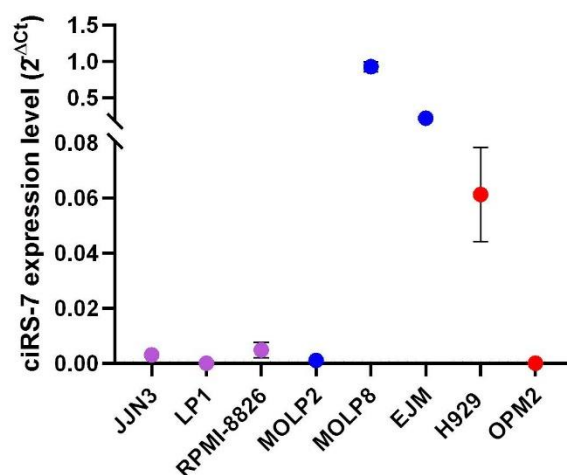

**Figure S5.** ciRS-7 expression in eight MM cell lines (purple=primary resistant cell lines, blue=partially resistant cell lines, red=sensitive cell lines). Relative ciRS-7 expression (RT-qPCR), error bars reflect technical triplicates.

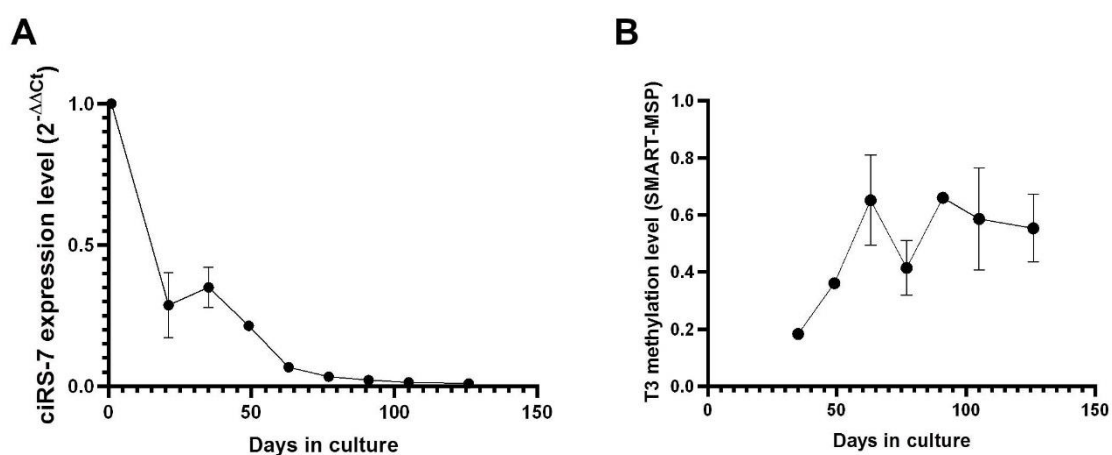

**Figure S6.** Loss of ciRS-7 expression over time in parental cells. **(A)** Relative ciRS-7 expression (RT-qPCR) of NCI-H929 cells growing in culture. Error bars reflect technical triplicates. **(B)** Relative methylation level (SMART-MSP) of T3 in NCI-H929 cells growing in culture. Error bars reflect technical triplicates.

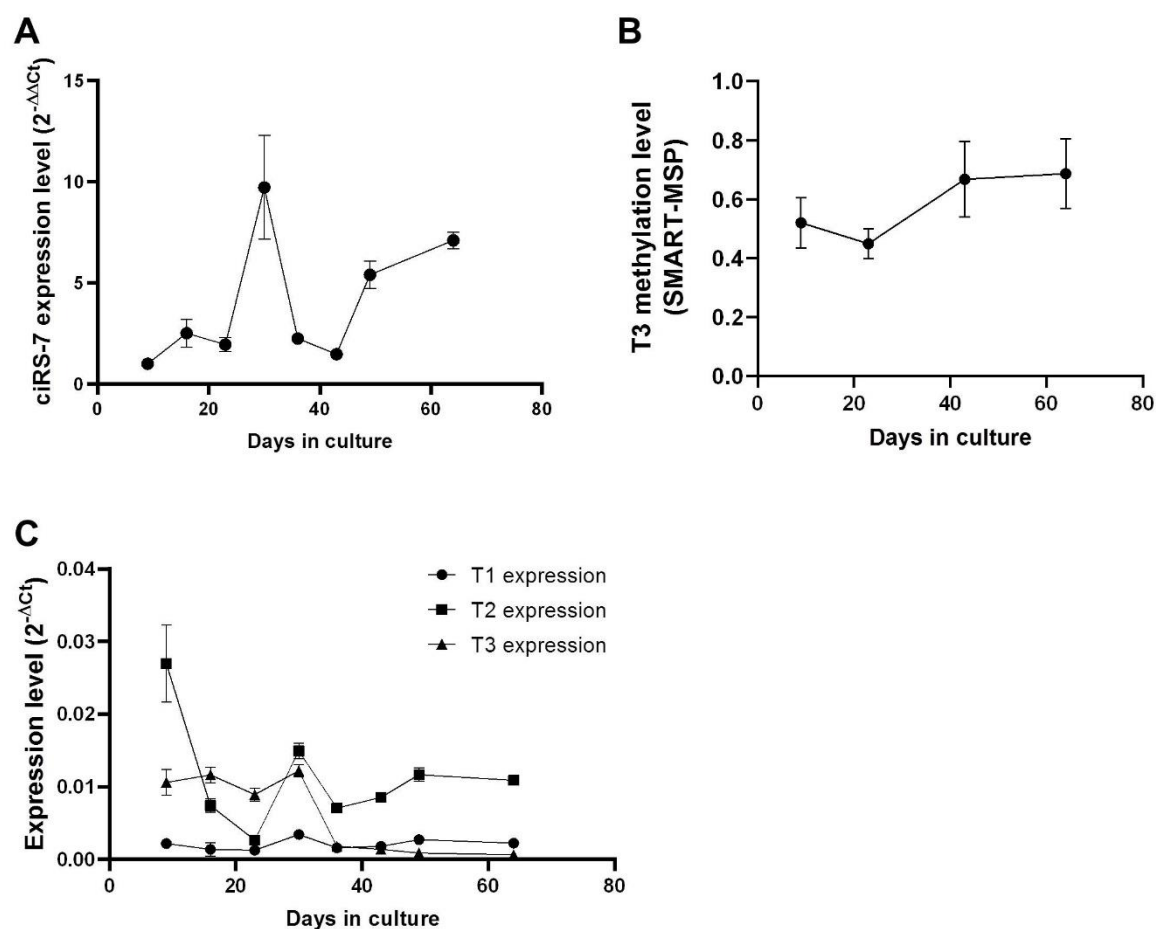

**Figure S7.** ciRS-7 expression over time in MOLP8 cells. **(A)** ciRS-7 expression (analyzed by RT-qPCR) in MOLP8 cells growing in culture. Error bars reflect technical triplicates. **(B)** T1, T2 and T3 expression (analyzed by RT-qPCR) in MOLP8 cells growing in culture. Error bars reflect technical triplicates. **(C)** Relative methylation level (SMART-MSP) of T3 in MOLP8 cells growing in culture. Error bars reflect technical triplicates.

**Table S1.** sisiRNA and siRNA sequences used for ciRS-7 knockdown.

| Target                           | Sequence                            |
|----------------------------------|-------------------------------------|
| ciRS-7 back-splice junction      | AAAACCCUGGAUUAUUGCAGAC              |
| ciRS-7 internal sequence         | UUGGAAGACACAAGUAGGCGCU <sup>1</sup> |
| circIKZF3 back-splice junction 1 | UCCGCACUUGCAAUGAAUUUC[dT][dT]       |
| circIKZF3 back-splice junction 2 | GCACUUGCAAUGAAUUUCUGA[dT][dT]       |

<sup>1</sup> The underlined nucleotides are locked nucleic acids (LNAs) that increase the hybridization properties of the sisiRNA.

**Table S2.** Primers for RT-qPCR.

| Target gene/transcript | Forward primer               | Reverse primer            |
|------------------------|------------------------------|---------------------------|
| LINC00632 (T1)         | 5'GACATGGAATTCCTGGATCA       | 5'GTCAGTGGTGGCAAACGTC     |
| LINC00632 (T2)         | 5' CCGTCCCTTGCTGATTGTAT      | 5' GTCAGTGGTGGCAAACGTC    |
| LINC00632 (T3)         | 5'GAGGCGGTTAAGGAGAGGAG       | 5'TCAGGAGTCAAGGTCAGGCTA   |
| ciRS-7                 | 5'ACGTCTCCAGTGTGCTGA         | 5'CTTGACACAGGTGCCATC      |
| Linear IKZF3           | 5' ACATTTCTTCAGAGCACTGACC    | 5' TCTGCTTTGATGTGTCTTGCCT |
| Circular IKZF3         | 5'GAAAAAGCTCAATGCCTCAGAAATTC | 5' TCTGCTTTGATGTGTCTTGCCT |
| SF3A1                  | 5'TCCATCCGTGAGAAGCAGAGC      | 5'TCTGGATCTCCTCCTCACC     |
| PUM1                   | 5'CATGCCAGGTTATCCGGTGT       | 5'GCGCCTGCATTCACTACAAG    |

**Table S3.** Methylation-specific primers used for SMART-MSP.

| Target gene/transcript | Forward primer                                         | Reverse primer                                          |
|------------------------|--------------------------------------------------------|---------------------------------------------------------|
| LINC00632 (T3)         | 5' gtgg <b>cg</b> agtTaggagT <b>cg</b> ac <sup>1</sup> | 5' tctAAaAaAacc <b>cg</b> cccctAc <b>g</b> <sup>1</sup> |
| Alu control            | 5' GGTTAGGTATAGTG<br>GTTTATATTGTAATTTTAGTA             | 5' ATTAACATAACTAATCTTA<br>AACTCCTAACCTCA                |

<sup>1</sup> For the LINC00632 (T3) primer set, upper-case T indicates that the base was C before sodium bisulfite conversion and CG sites are indicated in bold.

**Table S4.** Methylation-independent primers for amplification of bisulfite-treated DNA and subsequent Sanger sequencing.

| Target gene/transcript | Forward primer                              | Reverse primer                          |
|------------------------|---------------------------------------------|-----------------------------------------|
| LINC00632 (T3)         | 5'ggTataTtgTaaTtaggtTagaagtgaT <sup>1</sup> | 5' gagtTTtTTTtagagaggggagg <sup>1</sup> |

<sup>1</sup> Upper-case T indicates that the base was C before sodium bisulfite conversion.
