# Supplementary material for: Genome-Wide Circular RNA Expression Patterns Reflect Resistance to Immunomodulatory Drugs in Multiple Myeloma Cells
Source: Cancers (Basel). 2021 Jan 20;13(3):365. doi: 10.3390/cancers13030365 (PMC7930955; doi:10.3390/cancers13030365)
Supplement: Supplementary file 1 [file cancers-13-00365-s001.zip › Supplementary File S1.xlsx]

## Sheet: IMiD sensitive
chrom	start	end	sense_gene	antisense_gene	H929 junction	SA	SD	H929 CTL	H929 RPM
chr4	1905942	1936989	WHSC1	.	238	140	1003	0.416084	5.16164
chr19	24014398	24016323	.	.	208	75	18	4.42553	4.51101
chr4	153332454	153333681	FBXW7	.	126	88	9	2.57143	2.73263
chrX	139865339	139866824	.	CDR1	99	0	0	198	2.14707
chr6	4891946	4892613	CDYL	.	94	38	29	2.76471	2.03863
chr8	52773404	52773806	PCMTD1	.	87	254	66	0.542056	1.88682
chr11	33307958	33309057	HIPK3	.	78	24	20	3.46667	1.69163
chr17	37933903	37934020	IKZF3	.	77	62	166	0.672489	1.66994
chr4	1905942	1920350	WHSC1	.	74	140	1158	0.113934	1.60488
chr7	139415730	139416814	HIPK2	.	70	127	21	0.939597	1.51813
chr14	97299803	97327072	VRK1	.	70	27	153	0.773481	1.51813
chr11	130130750	130131824	ZBTB44	.	56	47	14	1.80645	1.2145
chr1	117944807	117963271	MAN1A2	.	54	233	27	0.413793	1.17113
chr14	23378691	23380612	RBM23	.	53	121	159	0.377224	1.14944
chr19	23541231	23545527	ZNF91	.	52	0	19	5.2	1.12775
chr4	144464661	144465125	SMARCA5	.	52	249	89	0.306785	1.12775
chr8	61653817	61655656	CHD7	.	50	17	45	1.5873	1.08438
chr22	42915719	42976365	.	SERHL2	45	48	8	1.57895	0.97594
chr18	42529845	42533305	SETBP1	.	45	56	87	0.625	0.97594
chr12	1136913	1137738	ERC1	.	44	130	22	0.575163	0.954252
chr1	1158623	1159348	SDF4	.	42	126	444	0.14711	0.910877
chr3	56626997	56628056	CCDC66	.	41	13	40	1.51852	0.889189
chr1	1586822	1650894	CDK11B	MMP23A	40	0	29	2.66667	0.867502
chr1	155823066	155823597	GON4L	.	39	79	59	0.561151	0.845814
chr16	68155889	68160513	NFATC3	.	39	5	59	1.2	0.845814
chr18	9182379	9221997	ANKRD12	.	38	17	10	2.71429	0.824127
chr2	200233327	200298237	SATB2	.	37	17	20	1.94737	0.802439
chr1	117944807	117948267	MAN1A2	.	36	233	258	0.146341	0.780752
chr9	114148656	114154104	KIAA0368	.	36	85	209	0.244068	0.780752
chr20	30954186	30956926	ASXL1	.	36	29	28	1.24138	0.780752
chr11	120345268	120348235	ARHGEF12	.	35	387	130	0.135135	0.759064
chr10	5836847	5842668	GDI2	.	35	697	600	0.0539291	0.759064
chr3	31617887	31621588	STT3B	.	34	301	371	0.10104	0.737377
chr3	171965322	171969331	FNDC3B	.	33	176	62	0.276151	0.715689
chr3	171969049	172028671	FNDC3B	.	33	722	240	0.0685358	0.715689
chr3	17051165	17056403	PLCL2	.	33	18	83	0.647059	0.715689
chr7	99621041	99621930	ZKSCAN1	.	30	40	37	0.769231	0.650626
chr4	1918597	1920350	WHSC1	.	29	1966	1158	0.01856	0.628939
chr17	65941524	65972074	BPTF	.	29	25	30	1.03571	0.628939
chr4	73956383	73958017	ANKRD17	.	28	27	0	2	0.607251
chr4	87967317	87968746	AFF1	.	27	70	7	0.692308	0.585564
chr19	13039155	13039661	FARSA	.	27	76	104	0.298343	0.585564
chr7	155465560	155473602	RBM33	.	27	35	46	0.658537	0.585564
chr12	116668337	116675510	MED13L	.	27	4	50	0.981818	0.585564
chr16	30495147	30495584	ITGAL	.	26	262	112	0.138667	0.563876
chr10	70719561	70720005	DDX21	.	26	251	171	0.122931	0.563876
chr10	125798030	125806240	CHST15	.	26	37	78	0.448276	0.563876
chr17	80521229	80526077	FOXK2	.	25	23	27	0.980392	0.542189
chr6	79752559	79770535	PHIP	.	25	147	35	0.273224	0.542189
chr10	126631025	126631876	ZRANB1	.	25	45	38	0.595238	0.542189
chr10	5827104	5842668	GDI2	.	25	116	600	0.069735	0.542189
chr4	73950965	73958017	ANKRD17	.	24	23	0	2	0.520501
chr9	138773478	138774924	CAMSAP1	.	24	57	23	0.592593	0.520501
chr13	96409897	96416207	DNAJC3	.	24	138	391	0.090566	0.520501
chr15	81262802	81274523	MESDC2	.	24	2	202	0.234146	0.520501
chr3	169863210	169867032	PHC3	.	23	71	103	0.262857	0.498814
chr10	5815804	5842668	GDI2	.	23	551	600	0.0399306	0.498814
chr6	158733082	158735300	TULP4	.	23	20	14	1.31429	0.498814
chr20	43600718	43615937	STK4	.	22	127	97	0.195556	0.477126
chr12	46622935	46637097	SLC38A1	.	22	215	310	0.0836502	0.477126
chr17	57808781	57816308	VMP1	.	22	199	133	0.132132	0.477126
chr14	80963811	80997230	CEP128	.	22	4	47	0.846154	0.477126
chr20	57014000	57016139	VAPB	.	21	13	67	0.518519	0.455438
chr3	56600621	56601081	CCDC66	.	21	65	22	0.477273	0.455438
chr10	116879948	116889297	ATRNL1	.	21	16	49	0.636364	0.455438
chr5	32135677	32143986	GOLPH3	.	21	443	351	0.0528302	0.455438
chr14	81297486	81307112	CEP128	.	20	65	130	0.204082	0.433751
chr1	155644800	155649303	YY1AP1	.	20	98	27	0.31746	0.433751
chr6	87925620	87928449	ZNF292	.	20	8	20	1.37931	0.433751
chr4	56277780	56284152	TMEM165	.	20	42	346	0.102828	0.433751
chr7	99090662	99092254	ZNF394	.	20	1	29	1.29032	0.433751
chr1	35824525	35827390	ZMYM4	.	20	8	50	0.677966	0.433751
chr1	117944807	117984947	MAN1A2	.	19	233	52	0.132867	0.412063
chr15	41961025	41962156	MGA	.	19	17	35	0.716981	0.412063
chr10	15875628	15889942	FAM188A	.	19	89	22	0.339286	0.412063
chr2	208841374	208842310	PLEKHM3	.	19	3	7	3.45455	0.412063
chr4	1905942	1932497	WHSC1	.	18	140	1511	0.0217918	0.390376
chr2	37543379	37544322	PRKD3	.	18	40	13	0.666667	0.390376
chr1	151139409	151139890	TNFAIP8L2	.	18	150	450	0.0599002	0.390376
chr3	157839891	157841780	RSRC1	.	18	65	118	0.195652	0.390376
chr15	41988272	41991357	MGA	.	18	41	25	0.537313	0.390376
chr11	120907213	120930794	TBCEL	.	18	12	84	0.371134	0.390376
chr6	87920168	87928449	ZNF292	.	18	0	20	1.71429	0.390376
chr16	47143393	47165936	NETO2	.	18	45	65	0.324324	0.390376
chr14	81209418	81244390	CEP128	.	17	11	34	0.73913	0.368688
chr5	122881110	122893258	CSNK1G3	.	17	19	104	0.274194	0.368688
chr6	16326624	16328701	ATXN1	.	17	17	28	0.73913	0.368688
chr8	109462051	109462721	EMC2	.	17	418	217	0.0534591	0.368688
chr5	60768507	60768864	ZSWIM6	.	17	6	34	0.829268	0.368688
chr7	151944986	151970952	KMT2C	.	17	17	19	0.918919	0.368688
chr20	34317233	34320057	RBM39	.	17	119	306	0.0798122	0.368688
chr1	155408117	155408859	ASH1L	.	17	10	6	2	0.368688
chr11	32948702	32956981	QSER1	.	17	0	1	17	0.368688
chr2	72945231	72960247	EXOC6B	.	16	27	28	0.571429	0.347001
chr21	11038727	11058323	BAGE5	.	16	44	3	0.666667	0.347001
chr20	60714130	60716000	PSMA7	.	16	235	270	0.0632411	0.347001
chr2	72958135	72960247	EXOC6B	.	16	35	28	0.5	0.347001
chr20	34300940	34313077	RBM39	.	16	68	121	0.168421	0.347001
chr11	108186549	108206688	ATM	.	16	139	19	0.201258	0.347001
chr11	120343758	120348235	ARHGEF12	.	15	341	130	0.0635593	0.325313
chr1	58971731	59004982	OMA1	.	15	42	13	0.535714	0.325313
chr1	155408117	155429689	ASH1L	.	15	10	88	0.30303	0.325313
chr8	98698895	98703416	MTDH	.	15	4412	1484	0.00508733	0.325313
chr12	124071293	124074996	TMED2	.	15	1055	2170	0.00929944	0.325313
chr7	128655032	128658211	TNPO3	.	15	50	53	0.288462	0.325313
chr22	22160138	22162135	MAPK1	.	15	86	75	0.185185	0.325313
chr18	9204473	9221997	ANKRD12	.	15	13	10	1.25	0.325313
chr12	46633461	46637097	SLC38A1	.	15	507	310	0.0366748	0.325313
chr11	8435041	8486369	STK33	.	15	13	70	0.357143	0.325313
chr2	64778576	64780543	AFTPH	.	15	65	44	0.272727	0.325313
chr12	116668237	116675510	MED13L	.	15	2	50	0.566038	0.325313
chr2	48555699	48573890	FOXN2	.	15	20	34	0.545455	0.325313
chr18	39607406	39629569	PIK3C3	.	15	218	137	0.0842697	0.325313
chr13	33109905	33111164	N4BP2L2	.	15	19	176	0.153061	0.325313
chr19	50838315	50862904	.	.	15	0	21	1.36364	0.325313
chr1	117944807	117957453	MAN1A2	.	14	233	168	0.0696517	0.303626
chr18	9195548	9221997	ANKRD12	.	14	227	10	0.117647	0.303626
chr16	68155889	68157024	NFATC3	.	14	5	47	0.528302	0.303626
chr10	105382226	105420872	SH3PXD2A	.	14	13	9	1.21739	0.303626
chr1	28362054	28384605	EYA3	.	14	95	266	0.0773481	0.303626
chr20	34309661	34313077	RBM39	.	14	128	121	0.112	0.303626
chr18	54423813	54426184	WDR7	.	14	82	8	0.307692	0.303626
chr15	49528047	49531564	GALK2	.	14	100	122	0.125561	0.303626
chr19	24014398	24017206	.	.	14	75	3	0.35443	0.303626
chr1	52981562	52992045	ZCCHC11	.	14	58	32	0.307692	0.303626
chrX	53672262	53681075	HUWE1	.	14	78	136	0.130233	0.303626
chr7	38050522	38053183	.	.	14	0	0	28	0.303626
chr1	151060665	151090615	GABPB2	.	14	91	0	0.304348	0.303626
chr3	141228409	141259451	RASA2	.	14	1	66	0.411765	0.303626
chr12	109046047	109048186	CORO1C	.	14	20	4	1.12	0.303626
chr3	122156016	122160963	KPNA1	LOC102723582	14	26	59	0.325581	0.303626
chr10	7285519	7327916	SFMBT2	.	13	25	20	0.565217	0.281938
chr12	69210591	69222711	MDM2	.	13	661	2898	0.00730337	0.281938
chr12	120592773	120593523	GCN1	.	13	87	98	0.139785	0.281938
chrX	134679347	134690225	INTS6L	.	13	23	66	0.288889	0.281938
chr9	88920106	88924932	ZCCHC6	.	13	36	165	0.128713	0.281938
chr18	42281139	42281797	SETBP1	.	13	2	64	0.38806	0.281938
chr2	173423435	173431661	PDK1	.	13	79	244	0.0802469	0.281938
chr11	118656760	118657227	DDX6	.	13	61	43	0.247619	0.281938
chr4	75040222	75091111	MTHFD2L	.	13	8	6	1.73333	0.281938
chr1	205585605	205593019	ELK4	.	13	1	8	2.6	0.281938
chr2	191765289	191789319	GLS	.	13	67	103	0.152047	0.281938
chr9	37126308	37127260	ZCCHC7	.	13	21	3	1.04	0.281938
chr1	9991948	9994918	LZIC	.	13	17	19	0.702703	0.281938
chr18	48702264	48703946	MEX3C	.	13	0	37	0.684211	0.281938
chr7	22330793	22357656	RAPGEF5	.	13	8	4	2	0.281938
chr18	12999419	13042333	CEP192	.	13	2	72	0.346667	0.281938
chr7	148543561	148544397	EZH2	.	12	46	5	0.461538	0.260251
chr15	64791491	64792365	ZNF609	.	12	3	6	2.4	0.260251
chr8	42761315	42798588	HOOK3	.	12	124	20	0.165517	0.260251
chr21	10985044	10998335	.	.	12	4	35	0.6	0.260251
chr6	77981056	77983024	.	.	12	2	1	6	0.260251
chr3	171969049	172016577	FNDC3B	.	12	722	442	0.0206009	0.260251
chr5	6737622	6746540	PAPD7	.	12	10	9	1.2	0.260251
chr1	28907071	28907741	SNHG12	.	12	42	17	0.4	0.260251
chr14	99924615	99932150	SETD3	.	12	26	15	0.571429	0.260251
chr11	73418464	73429763	RAB6A	.	12	102	44	0.163265	0.260251
chr1	155896466	155896947	KIAA0907	.	12	126	211	0.0710059	0.260251
chr12	70193988	70195501	RAB3IP	.	12	17	10	0.857143	0.260251
chr14	31416295	31425448	STRN3	.	12	121	85	0.115942	0.260251
chr19	58772216	58775042	ZNF544	.	12	15	0	1.5	0.260251
chr3	43341245	43345284	SNRK	.	12	3	13	1.41176	0.260251
chr2	168869143	168873605	STK39	.	12	44	10	0.436364	0.260251
chr9	86293355	86301070	UBQLN1	.	12	117	49	0.143713	0.260251
chr12	69210591	69218431	MDM2	.	11	661	640	0.0168971	0.238563
chr4	178274461	178274882	NEIL3	.	11	6	11	1.22222	0.238563
chr8	22332466	22333137	PPP3CC	.	11	147	143	0.0756014	0.238563
chr18	19345732	19399607	MIB1	.	11	63	52	0.189655	0.238563
chr7	24659670	24708279	MPP6	.	11	0	58	0.372881	0.238563
chr20	46365446	46386207	SULF2	.	11	107	104	0.103774	0.238563
chr11	108137897	108138069	ATM	.	11	135	129	0.0830189	0.238563
chr1	41536266	41541123	SCMH1	.	11	38	14	0.415094	0.238563
chr7	24663284	24708279	MPP6	.	11	12	58	0.309859	0.238563
chr1	21083658	21100103	HP1BP3	.	11	32	149	0.120879	0.238563
chr7	99952765	99953427	STAG3L5P-PVRIG2P-PILRB	.	11	37	0	0.578947	0.238563
chr9	6420911	6434173	UHRF2	.	11	23	67	0.241758	0.238563
chr12	69983264	69985939	CCT2	.	11	437	799	0.017785	0.238563
chr10	22193450	22209892	DNAJC1	.	11	2062	302	0.00930233	0.238563
chr6	7899808	7904956	BLOC1S5-TXNDC5	.	11	3657	12027	0.00140261	0.238563
chr5	65349233	65350779	ERBIN	.	11	126	37	0.134146	0.238563
chr20	45891031	45905539	ZMYND8	.	11	77	62	0.157143	0.238563
chr2	200245086	200298237	SATB2	.	11	51	20	0.305556	0.238563
chr17	35310185	35311207	AATF	.	11	85	61	0.14966	0.238563
chr9	127670655	127674305	GOLGA1	.	11	3	53	0.385965	0.238563
chr1	224599128	224601037	WDR26	.	11	39	6	0.478261	0.238563
chr8	98725889	98735263	MTDH	.	11	1439	5150	0.00333839	0.238563
chr3	169694733	169706147	SEC62	.	11	334	228	0.0390764	0.238563
chr7	156619298	156629579	LMBR1	.	11	12	17	0.733333	0.238563
chr12	1399017	1481143	ERC1	.	11	94	26	0.181818	0.238563
chr15	75219106	75221573	COX5A	.	11	62	60	0.178862	0.238563
chr18	19345732	19359646	MIB1	.	10	63	57	0.165289	0.216875
chr5	109049220	109065214	MAN2A1	.	10	108	73	0.10989	0.216875
chr17	45479497	45492285	EFCAB13	.	10	7	2	2	0.216875
chr9	33953282	33963789	UBAP2	.	10	13	34	0.416667	0.216875
chr19	8520288	8528570	HNRNPM	.	10	83	39	0.162602	0.216875
chr20	33065576	33067594	ITCH	.	10	439	118	0.0358423	0.216875
chr17	37933903	37934263	IKZF3	.	10	62	0	0.31746	0.216875
chr1	31465236	31468067	PUM1	.	10	13	158	0.116279	0.216875
chr18	8718421	8720494	MTCL1	.	10	14	11	0.769231	0.216875
chr5	109049220	109051965	MAN2A1	.	10	108	140	0.0803213	0.216875
chr10	125780771	125806240	CHST15	.	10	19	78	0.204082	0.216875
chr17	20107645	20109225	SPECC1	.	10	14	6	0.952381	0.216875
chr20	33057852	33080402	ITCH	.	10	169	337	0.0394477	0.216875
chr5	65284462	65290692	ERBIN	.	10	82	48	0.152672	0.216875
chr7	33185853	33217203	BBS9	.	10	3	0	5	0.216875
chr10	5741487	5756170	FAM208B	.	10	0	52	0.377358	0.216875
chr14	50616725	50616948	SOS2	.	10	28	64	0.215054	0.216875
chr6	108243000	108250718	SEC63	.	10	50	34	0.235294	0.216875
chr1	150202905	150204264	ANP32E	.	10	733	46	0.025641	0.216875
chr3	3819408	3830758	.	.	10	0	4	4	0.216875
chr15	65471271	65472542	CLPX	.	10	62	47	0.181818	0.216875
chr4	25315667	25317022	ZCCHC4	.	10	12	36	0.408163	0.216875
chr22	46085591	46136418	ATXN10	.	10	7	19	0.740741	0.216875
chr12	120995084	120995485	RNF10	.	10	115	99	0.0930233	0.216875

## Sheet: LR
chrom	start	end	sense_gene	antisense_gene	Len junction	SA	SD	Len CTL	Len RPM
chr4	1905942	1936989	WHSC1	.	184	162	1681	0.199566	5.78006
chr19	24014398	24016323	.	.	130	45	19	4	4.08374
chr6	4891946	4892613	CDYL	.	116	52	29	2.82927	3.64395
chr17	37933903	37934020	IKZF3	.	86	55	410	0.369099	2.70155
chr4	1905942	1920350	WHSC1	.	69	162	823	0.139959	2.16752
chr8	52773404	52773806	PCMTD1	.	69	77	68	0.945205	2.16752
chr1	117944807	117963271	MAN1A2	.	67	246	19	0.503759	2.1047
chr4	153332454	153333681	FBXW7	.	58	26	10	3.13514	1.82198
chr7	99621041	99621930	ZKSCAN1	.	53	29	9	2.71795	1.66491
chr14	81297486	81307112	CEP128	.	46	99	142	0.380165	1.44502
chr4	144464661	144465125	SMARCA5	.	40	247	57	0.262295	1.25654
chr18	9182379	9221997	ANKRD12	.	38	20	4	3.04	1.19371
chr3	56626997	56628056	CCDC66	.	37	30	41	1.02778	1.1623
chr1	117944807	117948267	MAN1A2	.	37	246	151	0.18593	1.1623
chr19	23541231	23545527	ZNF91	.	36	0	8	8	1.13088
chr10	70719561	70720005	DDX21	.	36	530	154	0.105109	1.13088
chr17	80521229	80526077	FOXK2	.	35	41	9	1.37255	1.09947
chr11	120345268	120348235	ARHGEF12	.	35	460	191	0.107362	1.09947
chr12	1136913	1137738	ERC1	.	34	39	21	1.11475	1.06806
chr1	1158623	1159348	SDF4	.	34	80	332	0.164649	1.06806
chr18	9195548	9221997	ANKRD12	.	34	341	4	0.196532	1.06806
chr16	30495147	30495584	ITGAL	.	33	283	99	0.172324	1.03664
chr14	97299803	97327072	VRK1	.	33	32	254	0.229965	1.03664
chr15	64791491	64792365	ZNF609	.	32	2	1	16	1.00523
chr4	87967317	87968746	AFF1	.	31	107	3	0.558559	0.973815
chr4	1918597	1920350	WHSC1	.	31	1791	823	0.0237094	0.973815
chr7	139415730	139416814	HIPK2	.	30	98	18	0.512821	0.942402
chr14	23378691	23380612	RBM23	.	29	145	193	0.171091	0.910988
chr1	1586822	1650894	CDK11B	MMP23A	28	0	22	2.43478	0.879575
chr18	42529845	42533305	SETBP1	.	27	92	84	0.305085	0.848162
chr3	171969049	172028671	FNDC3B	.	27	754	65	0.0658537	0.848162
chr10	5836847	5842668	GDI2	.	26	319	756	0.0483271	0.816748
chr2	37543379	37544322	PRKD3	.	26	9	15	2.08	0.816748
chr11	130130750	130131824	ZBTB44	.	25	21	13	1.42857	0.785335
chr10	126631025	126631876	ZRANB1	.	25	11	23	1.42857	0.785335
chr3	31617887	31621588	STT3B	.	24	147	79	0.211454	0.753921
chr6	79752559	79770535	PHIP	.	24	80	31	0.428571	0.753921
chr14	81209418	81244390	CEP128	.	24	17	24	1.14286	0.753921
chr10	5827104	5842668	GDI2	.	24	35	756	0.0606061	0.753921
chr2	72945231	72960247	EXOC6B	.	23	13	34	0.958333	0.722508
chr1	155408117	155429689	ASH1L	.	23	11	71	0.554217	0.722508
chr10	5815804	5842668	GDI2	.	23	535	756	0.0356037	0.722508
chr11	33307958	33309057	HIPK3	.	22	13	12	1.69231	0.691095
chr19	13039155	13039661	FARSA	.	22	45	78	0.354839	0.691095
chr8	61653817	61655656	CHD7	.	22	21	45	0.656716	0.691095
chr1	117944807	117984947	MAN1A2	.	21	246	15	0.160305	0.659681
chr10	91511102	91522592	KIF20B	.	21	116	30	0.285714	0.659681
chrX	139865339	139866824	.	CDR1	21	0	0	42	0.659681
chr21	10985044	10998335	.	.	20	1	35	1.08108	0.628268
chr3	157839891	157841780	RSRC1	.	20	70	124	0.205128	0.628268
chr20	34317233	34320057	RBM39	.	20	73	561	0.0629921	0.628268
chr18	19345732	19359646	MIB1	.	19	64	37	0.372549	0.596854
chr16	80718434	80719026	CDYL2	.	19	16	44	0.622951	0.596854
chr6	158733082	158735300	TULP4	.	19	21	4	1.46154	0.596854
chr1	28362054	28384605	EYA3	.	18	85	171	0.140078	0.565441
chr1	155823066	155823597	GON4L	.	17	52	20	0.465753	0.534028
chr9	114148656	114154104	KIAA0368	.	17	67	132	0.17	0.534028
chr19	8520288	8528570	HNRNPM	.	17	197	42	0.141667	0.534028
chr3	171969049	172016577	FNDC3B	.	17	754	629	0.0245665	0.534028
chr20	46252654	46262380	NCOA3	.	16	235	33	0.118959	0.502614
chr4	1905942	1932497	WHSC1	.	16	162	1293	0.021978	0.502614
chr20	57014000	57016139	VAPB	.	16	5	52	0.551724	0.502614
chr15	41988272	41991357	MGA	.	16	71	11	0.385542	0.502614
chr12	69210591	69222711	MDM2	.	16	313	2174	0.0128617	0.502614
chr13	96409897	96416207	DNAJC3	.	16	108	299	0.0784314	0.502614
chr15	41961025	41962156	MGA	.	16	14	62	0.415584	0.502614
chr2	61118817	61149134	REL	.	16	107	0	0.296296	0.502614
chr17	65941524	65972074	BPTF	.	15	17	8	1.15385	0.471201
chr22	22160138	22162135	MAPK1	.	15	32	47	0.375	0.471201
chr20	46365446	46386207	SULF2	.	15	76	197	0.109489	0.471201
chr12	112371689	112381173	TMEM116	.	15	7	41	0.612245	0.471201
chr1	243579003	243589860	SDCCAG8	.	15	18	5	1.25	0.471201
chr8	98673299	98703416	MTDH	.	15	1402	787	0.0136986	0.471201
chr5	127474288	127488497	SLC12A2	.	15	85	4	0.333333	0.471201
chr2	200233327	200298237	SATB2	.	14	13	6	1.4	0.439788
chr7	155465560	155473602	RBM33	.	14	55	48	0.269231	0.439788
chr14	39648294	39648666	PNN	.	14	153	146	0.0933333	0.439788
chr12	120592773	120593523	GCN1	.	14	64	129	0.14433	0.439788
chr21	30693541	30702014	BACH1	.	14	11	63	0.373333	0.439788
chr11	34093272	34098189	CAPRIN1	.	14	77	313	0.0716113	0.439788
chr1	117944807	117957453	MAN1A2	.	13	246	125	0.0698925	0.408374
chr1	151139409	151139890	TNFAIP8L2	.	13	98	347	0.058296	0.408374
chr3	56600621	56601081	CCDC66	.	13	36	9	0.565217	0.408374
chr4	48371865	48385801	SLAIN2	.	13	17	11	0.896552	0.408374
chr20	60714130	60716000	PSMA7	.	13	159	370	0.0490566	0.408374
chr11	76174864	76183884	EMSY	.	13	57	12	0.371429	0.408374
chr11	118656760	118657227	DDX6	.	13	18	16	0.742857	0.408374
chr9	112898406	112900819	PALM2	.	13	9	179	0.137566	0.408374
chr4	73950965	73958017	ANKRD17	.	12	20	0	1.14286	0.376961
chr7	148543561	148544397	EZH2	.	12	36	10	0.510638	0.376961
chr22	42915719	42976365	.	SERHL2	12	49	2	0.461538	0.376961
chr16	68155889	68160513	NFATC3	.	12	5	35	0.585366	0.376961
chr9	138773478	138774924	CAMSAP1	.	12	73	43	0.205128	0.376961
chr12	116668337	116675510	MED13L	.	12	5	18	1	0.376961
chr1	31465236	31468067	PUM1	.	12	2	148	0.15894	0.376961
chr17	57808781	57816308	VMP1	.	12	165	128	0.0816327	0.376961
chr18	44526019	44526886	.	.	12	11	1	1.84615	0.376961
chr5	32135677	32143986	GOLPH3	.	12	295	381	0.0354505	0.376961
chr12	46633461	46637097	SLC38A1	.	12	161	146	0.0779221	0.376961
chr6	16326624	16328701	ATXN1	.	11	3	13	1.29412	0.345547
chr17	45479497	45492285	EFCAB13	.	11	1	1	7.33333	0.345547
chr8	109462051	109462721	EMC2	.	11	417	203	0.0354267	0.345547
chr20	30954186	30956926	ASXL1	.	11	64	41	0.207547	0.345547
chr4	73956383	73958017	ANKRD17	.	11	36	0	0.594595	0.345547
chr19	34921480	34929671	UBA2	.	11	203	42	0.0894309	0.345547
chr18	42281139	42281797	SETBP1	.	11	9	29	0.564103	0.345547
chr8	107691437	107696587	OXR1	.	11	384	627	0.0217391	0.345547
chr5	102432244	102433485	GIN1	.	11	7	45	0.415094	0.345547
chr20	35812582	35812776	RPN2	.	11	407	382	0.0278481	0.345547
chr8	68044185	68049838	CSPP1	.	11	24	27	0.423077	0.345547
chr9	103261046	103279053	MSANTD3	.	11	24	6	0.709677	0.345547
chr2	122363276	122363756	CLASP1	.	11	29	21	0.431373	0.345547
chr6	158703294	158735300	.	.	11	3	4	2.75	0.345547
chr10	15875628	15885271	FAM188A	.	11	34	21	0.392857	0.345547
chr18	48444479	48466756	ME2	.	11	933	620	0.014157	0.345547
chr5	122881110	122893258	CSNK1G3	.	10	22	30	0.377358	0.314134
chr10	7285519	7327916	SFMBT2	.	10	8	12	0.952381	0.314134
chr2	240929490	240946787	NDUFA10	.	10	67	68	0.147059	0.314134
chr10	116879948	116889297	ATRNL1	.	10	3	35	0.512821	0.314134
chr6	24416624	24418806	MRS2	.	10	57	36	0.212766	0.314134
chr2	72958135	72960247	EXOC6B	.	10	17	34	0.384615	0.314134
chr6	7181356	7189555	RREB1	.	10	73	8	0.243902	0.314134
chr18	55278868	55283207	NARS	.	10	161	1059	0.01638	0.314134
chr10	112356155	112358048	SMC3	.	10	148	61	0.0952381	0.314134
chr1	52959282	52975384	ZCCHC11	.	10	36	24	0.327869	0.314134
chr1	174241551	174274265	RABGAP1L	.	10	302	58	0.0554017	0.314134
chr21	34614144	34625135	IFNAR2	.	10	11	28	0.5	0.314134
chr8	42819453	42873637	HOOK3	.	10	256	0	0.077821	0.314134
chr17	71231614	71233134	C17orf80	.	10	28	13	0.47619	0.314134
chr2	128750760	128754065	SAP130	.	10	16	19	0.555556	0.314134
chr4	1905942	1941505	WHSC1	.	10	162	168	0.060423	0.314134
chr2	208841374	208842310	PLEKHM3	.	10	0	3	5	0.314134
chr1	6867042	6885270	CAMTA1	.	10	0	19	1	0.314134
chr12	69210591	69218431	MDM2	.	9	313	487	0.0224719	0.282721
chr10	15875628	15889942	FAM188A	.	9	34	14	0.367347	0.282721
chr15	87949593	87966067	.	.	9	20	7	0.642857	0.282721
chr12	46622935	46637097	SLC38A1	.	9	142	146	0.0622837	0.282721
chr5	41794104	41807540	OXCT1	.	9	150	127	0.0647482	0.282721
chr18	8718421	8720494	MTCL1	.	9	19	13	0.545455	0.282721
chr16	68155889	68157024	NFATC3	.	9	5	31	0.486486	0.282721
chr5	68470703	68471364	CCNB1	.	9	169	54	0.0803571	0.282721
chr10	105382226	105420872	SH3PXD2A	.	9	44	11	0.321429	0.282721
chr1	28907071	28907741	SNHG12	.	9	34	42	0.233766	0.282721
chr1	1601102	1666274	CDK11B	MMP23A	9	12	3	1.125	0.282721
chrX	149962163	149984551	CD99L2	.	9	18	205	0.0803571	0.282721
chr15	87898779	87966067	.	.	9	16	7	0.75	0.282721
chr15	81262802	81274523	MESDC2	.	9	0	347	0.0517241	0.282721
chr11	120907213	120930794	TBCEL	.	9	17	55	0.246575	0.282721
chr18	48450467	48466756	ME2	.	9	975	620	0.0112782	0.282721
chrX	44383247	44386611	FUNDC1	.	9	0	52	0.339623	0.282721
chr2	136432901	136437894	R3HDM1	.	9	306	54	0.0498615	0.282721
chr11	8435041	8486369	STK33	.	9	16	74	0.197802	0.282721
chr6	17648037	17649531	NUP153	.	9	45	173	0.0821918	0.282721
chr1	155408117	155408859	ASH1L	.	9	11	6	1	0.282721
chr8	98725889	98735263	MTDH	.	9	1432	8754	0.00176696	0.282721
chr17	40174416	40174658	NKIRAS2	.	9	58	15	0.243243	0.282721
chr8	80963761	80976828	TPD52	.	9	160	535	0.0258621	0.282721
chr2	200233327	200246543	SATB2	.	9	13	31	0.4	0.282721
chr1	35846859	35855699	ZMYM4	.	9	46	18	0.276923	0.282721
chr11	108046972	108047817	NPAT	.	9	15	147	0.110429	0.282721
chr1	155644800	155649303	YY1AP1	.	8	133	8	0.112676	0.251307
chr6	87925620	87928449	ZNF292	.	8	17	9	0.592593	0.251307
chr20	43600718	43615937	STK4	.	8	49	45	0.168421	0.251307
chr9	33971648	33973235	UBAP2	.	8	25	0	0.615385	0.251307
chr3	169863210	169867032	PHC3	.	8	60	42	0.15534	0.251307
chr12	124071293	124074996	TMED2	.	8	764	1751	0.0063593	0.251307
chr10	28872327	28884970	WAC	.	8	90	231	0.0496894	0.251307
chr12	69222550	69230529	MDM2	.	8	491	240	0.0218579	0.251307
chr7	99090662	99092254	ZNF394	.	8	0	29	0.533333	0.251307
chr1	155691307	155695810	DAP3	.	8	446	98	0.0293578	0.251307
chr12	69644908	69656342	CPSF6	.	8	106	25	0.121212	0.251307
chr16	3900297	3901010	CREBBP	.	8	10	34	0.355556	0.251307
chr1	41536266	41541123	SCMH1	.	8	21	7	0.551724	0.251307
chr3	171969049	172025291	FNDC3B	.	8	754	47	0.0199501	0.251307
chr9	138741982	138758382	CAMSAP1	.	8	9	80	0.177778	0.251307
chr1	155896466	155896947	KIAA0907	.	8	138	189	0.0487805	0.251307
chr12	124904502	124915333	NCOR2	.	8	7	27	0.457143	0.251307
chr16	70598967	70601439	SF3B3	.	8	57	66	0.129032	0.251307
chr10	5741487	5756170	FAM208B	.	8	0	18	0.842105	0.251307
chr6	92045595	92047935	.	.	8	2	0	5.33333	0.251307
chr9	33948371	33953472	UBAP2	.	8	54	27	0.195122	0.251307
chr18	13048857	13073184	CEP192	.	8	96	8	0.152381	0.251307
chr5	56160560	56161804	MAP3K1	.	8	24	5	0.533333	0.251307
chr1	155365249	155429689	ASH1L	POU5F1P4	8	13	71	0.188235	0.251307
chr19	8520288	8539128	HNRNPM	.	8	197	207	0.0395062	0.251307
chr1	155385534	155429689	ASH1L	POU5F1P4	8	52	71	0.129032	0.251307
chr4	156617907	156643344	GUCY1A3	.	8	106	21	0.125	0.251307
chr12	109046047	109048186	CORO1C	.	8	22	5	0.571429	0.251307
chr11	118425173	118430579	IFT46	.	8	123	47	0.0935673	0.251307
chr1	175070268	175070406	.	TNN	8	0	0	16	0.251307
chr1	146724277	146739177	CHD1L	.	8	41	31	0.219178	0.251307
chr8	42761315	42798588	HOOK3	.	7	84	16	0.138614	0.219894
chr12	1399017	1399178	ERC1	.	7	149	22	0.0813953	0.219894
chr4	178274461	178274882	NEIL3	.	7	2	19	0.636364	0.219894
chr8	109462051	109468159	EMC2	.	7	417	114	0.0263158	0.219894
chr5	167915606	167921655	RARS	.	7	87	118	0.0679612	0.219894
chr8	98698895	98703416	MTDH	.	7	7587	787	0.00167164	0.219894
chr3	17051165	17056403	PLCL2	.	7	17	33	0.27451	0.219894
chr4	39739039	39776553	UBE2K	.	7	99	72	0.0813953	0.219894
chr7	128655032	128658211	TNPO3	.	7	15	19	0.4	0.219894
chr10	102683731	102685776	SLF2	.	7	43	103	0.0952381	0.219894
chr5	60768507	60768864	ZSWIM6	.	7	9	19	0.482759	0.219894
chr21	46548316	46554747	ADARB1	.	7	32	45	0.179487	0.219894
chr12	46319924	46322642	SCAF11	.	7	51	17	0.202899	0.219894
chr14	81209418	81227957	CEP128	.	7	17	155	0.0809249	0.219894
chr1	8601272	8617582	RERE	.	7	7	8	0.875	0.219894
chr21	17135209	17138460	USP25	.	7	27	36	0.21875	0.219894
chr9	88920106	88924932	ZCCHC6	.	7	13	30	0.318182	0.219894
chr7	148716083	148718239	PDIA4	.	7	221	1334	0.00899743	0.219894
chr2	203419974	203421254	BMPR2	.	7	48	16	0.215385	0.219894
chr5	138699447	138700432	PAIP2	.	7	82	309	0.0357143	0.219894
chr18	60206913	60217693	ZCCHC2	.	7	5	28	0.411765	0.219894
chr4	2951660	2952972	NOP14	NOP14-AS1	7	200	176	0.0371353	0.219894
chr4	39915230	39927553	PDS5A	.	7	72	86	0.0880503	0.219894
chr6	13579682	13584457	SIRT5	.	7	2	6	1.55556	0.219894
chr14	80963811	80997230	CEP128	.	7	3	10	1	0.219894
chr11	108098321	108138069	ATM	.	7	58	45	0.134615	0.219894
chr4	75040222	75091111	MTHFD2L	.	7	2	3	2.33333	0.219894
chr18	53763305	53764426	.	LINC01539	7	4	3	1.75	0.219894
chr11	8474368	8486369	STK33	.	7	12	74	0.16092	0.219894
chr16	18846213	18856973	SMG1	.	7	9	44	0.259259	0.219894
chr22	28910744	28915308	TTC28	.	7	0	0	14	0.219894
chr10	22171210	22209892	DNAJC1	.	7	46	50	0.14433	0.219894
chr14	31416295	31425448	STRN3	.	7	144	75	0.0636364	0.219894
chrX	135323318	135326954	MAP7D3	.	7	73	383	0.0306346	0.219894
chr15	89656955	89659752	ABHD2	.	7	62	69	0.106061	0.219894
chrX	53672262	53681075	HUWE1	.	7	84	170	0.054902	0.219894
chr8	68005777	68007967	CSPP1	.	7	112	27	0.1	0.219894
chr19	38631823	38633350	SIPA1L3	.	7	24	9	0.411765	0.219894
chr1	45223227	45223812	KIF2C	.	7	98	31	0.107692	0.219894
chr2	99802639	99812219	MRPL30	.	7	58	2	0.229508	0.219894
chr11	70200406	70202360	PPFIA1	.	7	22	28	0.27451	0.219894
chr3	141228409	141259451	RASA2	.	7	1	27	0.482759	0.219894
chr4	106613132	106614643	INTS12	.	7	28	140	0.0828402	0.219894
chr6	90052042	90053475	UBE2J1	.	7	815	840	0.00845411	0.219894
chr11	85961337	85967554	EED	.	7	52	72	0.112	0.219894
chr9	128419929	128434922	MAPKAP1	.	7	266	68	0.041791	0.219894
chr13	113170753	113181798	TUBGCP3	.	7	1	12	1	0.219894
chr1	150464886	150469384	TARS2	.	7	36	16	0.264151	0.219894
chr8	61484604	61504528	RAB2A	.	7	219	108	0.0426829	0.219894
chr3	128514202	128526514	RAB7A	.	7	21	33	0.254545	0.219894
chr5	172359438	172362313	ERGIC1	.	7	177	16	0.0721649	0.219894
chr4	75040222	75067087	MTHFD2L	.	7	2	25	0.5	0.219894
chr8	42819453	42841938	HOOK3	.	7	256	322	0.0241796	0.219894

## Sheet: PR
chrom	start	end	sense_gene	antisense_gene	Pom junction	SA	SD	Pom CTL	Pom RPM
chr4	1905942	1936989	WHSC1	.	224	381	957	0.334578	5.32868
chr19	24014398	24016323	.	.	217	85	25	3.90991	5.16216
chr4	153332454	153333681	FBXW7	.	186	57	11	5.3913	4.42471
chr4	1905942	1920350	WHSC1	.	138	381	1800	0.126489	3.28285
chr6	4891946	4892613	CDYL	.	108	47	45	2.32258	2.56919
chr17	37933903	37934020	IKZF3	.	108	119	392	0.421875	2.56919
chr14	81297486	81307112	CEP128	.	97	137	183	0.604361	2.30751
chr18	9182379	9221997	ANKRD12	.	89	79	13	1.91398	2.1172
chr1	117944807	117963271	MAN1A2	.	86	211	31	0.707819	2.04583
chr12	1136913	1137738	ERC1	.	85	161	44	0.825243	2.02204
chr19	23541231	23545527	ZNF91	.	83	0	17	9.22222	1.97447
chr11	33307958	33309057	HIPK3	.	82	24	20	3.64444	1.95068
chr7	139415730	139416814	HIPK2	.	76	277	35	0.485623	1.80795
chr8	52773404	52773806	PCMTD1	.	68	122	82	0.663415	1.61764
chr14	23378691	23380612	RBM23	.	66	123	255	0.348285	1.57006
chr4	144464661	144465125	SMARCA5	.	57	297	143	0.258503	1.35596
chr16	30495147	30495584	ITGAL	.	57	325	187	0.222222	1.35596
chr11	130130750	130131824	ZBTB44	.	56	36	13	2.24	1.33217
chr1	1586822	1650894	CDK11B	MMP23A	54	0	57	1.86207	1.28459
chr14	97299803	97327072	VRK1	.	47	48	263	0.301282	1.11807
chr3	31617887	31621588	STT3B	.	47	496	280	0.120978	1.11807
chr1	1158623	1159348	SDF4	.	46	100	359	0.2	1.09428
chr3	56626997	56628056	CCDC66	.	44	34	58	0.946237	1.04671
chr17	80521229	80526077	FOXK2	.	44	60	41	0.862745	1.04671
chr2	72945231	72960247	EXOC6B	.	42	27	36	1.3125	0.999128
chr4	73950965	73958017	ANKRD17	.	41	34	0	2.34286	0.975339
chr11	120345268	120348235	ARHGEF12	.	40	600	461	0.0753296	0.95155
chr6	79752559	79770535	PHIP	.	37	189	63	0.29249	0.880184
chr1	155823066	155823597	GON4L	.	37	100	67	0.440476	0.880184
chr7	148543561	148544397	EZH2	.	37	117	6	0.596774	0.880184
chr15	64791491	64792365	ZNF609	.	35	4	2	10	0.832606
chr7	99621041	99621930	ZKSCAN1	.	34	28	13	1.61905	0.808818
chr4	87967317	87968746	AFF1	.	34	141	18	0.425	0.808818
chr1	117944807	117957453	MAN1A2	.	34	211	202	0.164251	0.808818
chr8	42761315	42798588	HOOK3	.	33	383	45	0.153846	0.785029
chr19	13039155	13039661	FARSA	.	32	58	107	0.385542	0.76124
chr22	42915719	42976365	.	SERHL2	32	50	7	1.10345	0.76124
chr14	81209418	81244390	CEP128	.	32	34	80	0.556522	0.76124
chr20	46252654	46262380	NCOA3	.	32	389	66	0.140351	0.76124
chr16	68155889	68160513	NFATC3	.	31	6	91	0.632653	0.737451
chr9	138773478	138774924	CAMSAP1	.	31	89	46	0.455882	0.737451
chr1	155644800	155649303	YY1AP1	.	31	215	26	0.256198	0.737451
chr12	69210591	69218431	MDM2	.	31	672	1189	0.0332975	0.737451
chr5	122881110	122893258	CSNK1G3	.	30	25	102	0.46875	0.713663
chr18	42529845	42533305	SETBP1	.	30	89	112	0.29703	0.713663
chr1	117944807	117948267	MAN1A2	.	29	211	268	0.120833	0.689874
chr10	70719561	70720005	DDX21	.	29	261	186	0.129464	0.689874
chr2	200233327	200298237	SATB2	.	28	23	24	1.16667	0.666085
chr10	5836847	5842668	GDI2	.	28	453	699	0.048569	0.666085
chr18	19345732	19359646	MIB1	.	28	74	62	0.408759	0.666085
chr3	171965322	171969331	FNDC3B	.	28	149	102	0.222222	0.666085
chr4	1905942	1932497	WHSC1	.	28	381	2046	0.0230643	0.666085
chr18	9195548	9221997	ANKRD12	.	28	388	13	0.139303	0.666085
chr5	109049220	109065214	MAN2A1	.	28	79	62	0.394366	0.666085
chr1	117944807	117984947	MAN1A2	.	27	211	41	0.213439	0.642296
chr2	37543379	37544322	PRKD3	.	27	27	45	0.739726	0.642296
chr11	120343758	120348235	ARHGEF12	.	27	884	461	0.0401189	0.642296
chr16	80718434	80719026	CDYL2	.	27	11	38	1.08	0.642296
chr12	1399017	1399178	ERC1	.	27	160	63	0.241071	0.642296
chr13	49712882	49720071	FNDC3A	.	27	33	79	0.477876	0.642296
chr6	16326624	16328701	ATXN1	.	26	24	37	0.83871	0.618508
chr6	87925620	87928449	ZNF292	.	26	29	24	0.962963	0.618508
chr9	114148656	114154104	KIAA0368	.	25	125	160	0.174825	0.594719
chr21	10985044	10998335	.	.	25	0	54	0.909091	0.594719
chr20	57014000	57016139	VAPB	.	25	15	55	0.704225	0.594719
chr1	151139409	151139890	TNFAIP8L2	.	25	125	389	0.0970874	0.594719
chr10	91511102	91522592	KIF20B	.	25	109	42	0.328947	0.594719
chr4	1918597	1920350	WHSC1	.	24	2441	1800	0.0113154	0.57093
chr3	157839891	157841780	RSRC1	.	24	117	156	0.175182	0.57093
chr17	45479497	45492285	EFCAB13	.	24	16	0	2.82353	0.57093
chr3	171969049	172028671	FNDC3B	.	23	623	209	0.0552221	0.547141
chr21	11038727	11058323	BAGE5	.	23	45	5	0.901961	0.547141
chr8	109462051	109462721	EMC2	.	23	668	240	0.0506051	0.547141
chr1	58971731	59004982	OMA1	.	23	67	24	0.5	0.547141
chr10	7285519	7327916	SFMBT2	.	23	4	14	2.42105	0.547141
chr15	41988272	41991357	MGA	.	22	98	26	0.352	0.523353
chr3	56600621	56601081	CCDC66	.	22	49	35	0.517647	0.523353
chr6	77981056	77983024	.	.	22	5	4	4.4	0.523353
chr7	155465560	155473602	RBM33	.	21	44	70	0.365217	0.499564
chr12	116668337	116675510	MED13L	.	21	7	52	0.7	0.499564
chr17	65941524	65972074	BPTF	.	21	16	14	1.35484	0.499564
chr20	30954186	30956926	ASXL1	.	21	34	38	0.575342	0.499564
chr20	43600718	43615937	STK4	.	21	76	78	0.270968	0.499564
chr11	95546095	95546753	CEP57	.	21	378	259	0.0658307	0.499564
chr9	33971648	33973235	UBAP2	.	21	65	6	0.583333	0.499564
chr8	103372298	103373854	UBR5	.	21	67	42	0.381818	0.499564
chr1	155408117	155429689	ASH1L	.	20	23	177	0.199005	0.475775
chr4	178274461	178274882	NEIL3	.	20	42	31	0.540541	0.475775
chr12	69210591	69222711	MDM2	.	20	672	3483	0.00962464	0.475775
chr3	169863210	169867032	PHC3	.	20	81	93	0.228571	0.475775
chr8	61653817	61655656	CHD7	.	19	18	36	0.690909	0.451986
chr8	109462051	109468159	EMC2	.	19	668	187	0.0443925	0.451986
chr19	33604672	33605325	GPATCH1	.	19	28	41	0.542857	0.451986
chr5	167915606	167921655	RARS	.	19	260	182	0.0857788	0.451986
chr10	126631025	126631876	ZRANB1	.	18	27	17	0.8	0.428198
chr9	33953282	33963789	UBAP2	.	18	30	66	0.371134	0.428198
chr4	153332454	153391140	FBXW7	.	18	57	2	0.6	0.428198
chrX	139865339	139866824	.	CDR1	17	0	0	34	0.404409
chr4	56277780	56284152	TMEM165	.	17	50	393	0.0765766	0.404409
chr10	5815804	5842668	GDI2	.	17	377	699	0.0315692	0.404409
chr13	96409897	96416207	DNAJC3	.	17	125	380	0.0671937	0.404409
chr8	98698895	98703416	MTDH	.	17	3149	1159	0.00789046	0.404409
chr3	17051165	17056403	PLCL2	.	17	33	57	0.373626	0.404409
chr19	8520288	8528570	HNRNPM	.	17	491	146	0.0532915	0.404409
chr11	120916382	120930794	TBCEL	.	17	35	120	0.217949	0.404409
chr1	146724277	146731572	CHD1L	.	17	63	13	0.441558	0.404409
chr15	41961025	41962156	MGA	.	16	28	89	0.271186	0.38062
chr10	15875628	15889942	FAM188A	.	16	66	27	0.340426	0.38062
chr12	124071293	124074996	TMED2	.	16	816	1764	0.0123983	0.38062
chr14	39648294	39648666	PNN	.	16	212	308	0.0614203	0.38062
chr15	87949593	87966067	.	.	16	42	11	0.592593	0.38062
chr20	33065576	33067594	ITCH	.	16	319	83	0.0794045	0.38062
chr4	39739039	39776553	UBE2K	.	16	386	163	0.0581818	0.38062
chr17	37933903	37934263	IKZF3	.	16	119	0	0.266667	0.38062
chr3	50102463	50103935	RBM6	.	16	55	167	0.143498	0.38062
chr12	46622935	46637097	SLC38A1	.	15	166	229	0.0757576	0.356831
chr12	120592773	120593523	GCN1	.	15	173	91	0.113208	0.356831
chr1	31465236	31468067	PUM1	.	15	10	240	0.119522	0.356831
chr11	72695132	72700142	FCHSD2	.	15	59	85	0.206897	0.356831
chr5	41794104	41807540	OXCT1	.	15	236	117	0.0847458	0.356831
chr10	28872327	28884970	WAC	.	15	176	320	0.0603622	0.356831
chr18	8718421	8720494	MTCL1	.	15	27	26	0.555556	0.356831
chr12	69222550	69230529	MDM2	.	15	1199	467	0.0179964	0.356831
chr7	128655032	128658211	TNPO3	.	14	40	60	0.277228	0.333043
chr17	57808781	57816308	VMP1	.	14	167	134	0.0927152	0.333043
chr16	68155889	68157024	NFATC3	.	14	6	31	0.736842	0.333043
chr5	68470703	68471364	CCNB1	.	14	236	80	0.0883281	0.333043
chr10	7318853	7327916	SFMBT2	.	14	9	14	1.16667	0.333043
chr7	99090662	99092254	ZNF394	.	14	1	53	0.509091	0.333043
chr1	155691307	155695810	DAP3	.	14	443	165	0.045977	0.333043
chr4	48371865	48385801	SLAIN2	.	14	26	54	0.345679	0.333043
chr3	171969049	172016577	FNDC3B	.	14	623	875	0.0186791	0.333043
chr18	44526019	44526886	.	.	14	2	5	3.5	0.333043
chr11	108098321	108100050	ATM	.	14	109	74	0.152174	0.333043
chr10	102683731	102685776	SLF2	.	14	47	87	0.207407	0.333043
chr12	69644908	69656342	CPSF6	.	14	180	56	0.118143	0.333043
chr5	6737622	6746540	PAPD7	.	14	14	35	0.56	0.333043
chr6	158733082	158735300	TULP4	.	13	22	9	0.8125	0.309254
chr10	5827104	5842668	GDI2	.	13	51	699	0.0346205	0.309254
chr5	60768507	60768864	ZSWIM6	.	13	17	32	0.52	0.309254
chr10	105382226	105420872	SH3PXD2A	.	13	36	4	0.634146	0.309254
chr5	109049220	109051965	MAN2A1	.	13	79	176	0.101562	0.309254
chr8	22332466	22333137	PPP3CC	.	13	407	92	0.052	0.309254
chr21	46548316	46554747	ADARB1	.	13	45	51	0.268041	0.309254
chr5	137320945	137324004	FAM13B	.	13	26	8	0.742857	0.309254
chr18	19345732	19399607	MIB1	.	13	74	81	0.166667	0.309254
chr1	28907071	28907741	SNHG12	.	13	82	56	0.18705	0.309254
chr8	28013458	28019595	ELP3	.	13	183	248	0.0601852	0.309254
chr1	1601102	1666274	CDK11B	MMP23A	13	9	2	2.16667	0.309254
chr12	46319924	46322642	SCAF11	.	13	84	76	0.161491	0.309254
chr22	22160138	22162135	MAPK1	.	12	76	64	0.170213	0.285465
chr14	99924615	99932150	SETD3	.	12	23	7	0.774194	0.285465
chrX	134679347	134690225	INTS6L	.	12	49	66	0.206897	0.285465
chr20	60714130	60716000	PSMA7	.	12	253	214	0.0512821	0.285465
chr18	9204473	9221997	ANKRD12	.	12	90	13	0.230769	0.285465
chr7	24659670	24708279	MPP6	.	12	1	102	0.230769	0.285465
chr21	30693541	30702014	BACH1	.	12	13	60	0.324324	0.285465
chrX	149962163	149984551	CD99L2	.	12	22	172	0.123077	0.285465
chr2	240929490	240946787	NDUFA10	.	12	88	115	0.117647	0.285465
chr16	3900297	3901010	CREBBP	.	12	21	38	0.4	0.285465
chr15	87898779	87966067	.	.	12	17	11	0.827586	0.285465
chr8	98731276	98735263	MTDH	.	12	1361	6754	0.00295712	0.285465
chr14	81209418	81227957	CEP128	.	12	34	137	0.139535	0.285465
chr20	46365446	46386207	SULF2	.	12	117	225	0.0699708	0.285465
chr1	8601272	8617582	RERE	.	12	18	9	0.857143	0.285465
chr11	108137897	108138069	ATM	.	12	129	51	0.132597	0.285465
chr3	196118683	196129890	UBXN7	.	12	30	19	0.48	0.285465
chr14	23375403	23380612	RBM23	.	12	28	255	0.084507	0.285465
chr13	49742748	49752790	FNDC3A	.	12	362	351	0.0336134	0.285465
chr1	231500072	231503382	EGLN1	.	12	0	166	0.143713	0.285465
chr4	73956383	73958017	ANKRD17	.	11	22	0	0.956522	0.261676
chr1	41536266	41541123	SCMH1	.	11	17	9	0.814815	0.261676
chr1	28362054	28384605	EYA3	.	11	88	575	0.0331325	0.261676
chr19	34921480	34929671	UBA2	.	11	272	87	0.0611111	0.261676
chr7	24663284	24708279	MPP6	.	11	9	102	0.196429	0.261676
chr2	172782046	172809519	HAT1	.	11	194	81	0.0797101	0.261676
chr21	17135209	17138460	USP25	.	11	26	42	0.318841	0.261676
chr1	21083658	21100103	HP1BP3	.	11	49	153	0.108374	0.261676
chr7	151944986	151970952	KMT2C	.	11	26	29	0.392857	0.261676
chr4	129913321	129925031	SCLT1	.	11	56	6	0.349206	0.261676
chr20	30115286	30115853	HM13	.	11	437	1	0.0501139	0.261676
chr2	231307651	231314970	SP100	.	11	103	21	0.176	0.261676
chr11	118454523	118455359	ARCN1	.	11	1226	866	0.0105112	0.261676
chr10	116879948	116889297	ATRNL1	.	10	13	41	0.363636	0.237888
chr9	88920106	88924932	ZCCHC6	.	10	43	123	0.11976	0.237888
chr1	35824525	35827390	ZMYM4	.	10	8	28	0.540541	0.237888
chr15	81262802	81274523	MESDC2	.	10	3	315	0.0626959	0.237888
chr7	148716083	148718239	PDIA4	.	10	342	1323	0.0120048	0.237888
chr4	1919867	1920350	WHSC1	.	10	2062	1800	0.00517732	0.237888
chr7	23015828	23023664	FAM126A	.	10	68	42	0.18018	0.237888
chr1	58971731	59002413	OMA1	.	10	67	60	0.15625	0.237888
chr1	115005725	115007010	TRIM33	.	10	19	23	0.465116	0.237888
chr16	4311779	4312702	TFAP4	.	10	4	103	0.185185	0.237888
chr6	24416624	24418806	MRS2	.	10	113	62	0.113636	0.237888
chr1	247319707	247323115	ZNF124	.	10	0	0	20	0.237888
chr15	41648236	41669502	NUSAP1	.	10	264	271	0.0373134	0.237888
chr15	63988322	64008672	HERC1	.	10	29	26	0.357143	0.237888
chr22	21288066	21288532	CRKL	.	10	26	168	0.102564	0.237888
chr18	48444479	48450582	ME2	.	10	917	381	0.0153965	0.237888
chr2	203419974	203421254	BMPR2	.	10	68	18	0.229885	0.237888
chr18	42281139	42339068	SETBP1	.	10	11	3	1.33333	0.237888
chr20	33057852	33069011	ITCH	.	10	186	287	0.0421941	0.237888
chr6	117010482	117026323	KPNA5	.	10	39	6	0.434783	0.237888
chr7	158552176	158557544	ESYT2	.	10	112	54	0.11976	0.237888
chr14	53464387	53510473	.	.	10	29	0	0.666667	0.237888
chr8	99718694	99719539	STK3	.	10	52	37	0.222222	0.237888
chr20	34317233	34320057	RBM39	.	9	76	436	0.0350877	0.214099
chr12	112371689	112381173	TMEM116	.	9	18	54	0.246575	0.214099
chr18	42281139	42281797	SETBP1	.	9	11	63	0.24	0.214099
chr5	138699447	138700432	PAIP2	.	9	141	933	0.0167442	0.214099
chr11	120907213	120930794	TBCEL	.	9	21	120	0.126761	0.214099
chr2	72958135	72960247	EXOC6B	.	9	33	36	0.257143	0.214099
chr3	31617887	31641951	STT3B	.	9	496	397	0.0201342	0.214099
chr18	33606862	33613800	RPRD1A	.	9	113	104	0.0825688	0.214099
chr18	45391429	45423180	SMAD2	.	9	15	103	0.151261	0.214099
chr11	76174864	76183884	EMSY	.	9	54	25	0.225	0.214099
chr1	65830317	65831879	DNAJC6	.	9	10	23	0.529412	0.214099
chr2	122260742	122287901	CLASP1	.	9	3	53	0.315789	0.214099
chr2	173423435	173431661	PDK1	.	9	118	291	0.0439024	0.214099
chr19	19750893	19751380	GMIP	.	9	168	14	0.0983607	0.214099
chr18	60206913	60217693	ZCCHC2	.	9	17	47	0.276923	0.214099
chr8	27151596	27151827	TRIM35	.	9	5	42	0.375	0.214099
chrX	134679347	134683730	INTS6L	.	9	49	143	0.0932642	0.214099
chr4	2951660	2952972	NOP14	NOP14-AS1	9	304	263	0.0316901	0.214099
chr7	40027197	40027857	CDK13	.	9	22	112	0.133333	0.214099
chr10	105197771	105198565	PDCD11	.	9	57	130	0.0957447	0.214099
chr7	99952765	99953427	STAG3L5P-PVRIG2P-PILRB	.	9	37	0	0.473684	0.214099
chr20	36685933	36694658	RPRD1B	.	9	49	1	0.352941	0.214099
chr20	34309661	34313077	RBM39	.	9	112	75	0.0957447	0.214099
chrX	19983161	19988416	CXorf23	.	9	6	0	2.57143	0.214099
chr9	6420911	6434173	UHRF2	.	9	15	76	0.195652	0.214099
chrX	48024315	48123352	.	SSX5	9	0	177	0.101124	0.214099
chr6	7181356	7189555	RREB1	.	9	76	8	0.211765	0.214099
chr18	55278868	55283207	NARS	.	9	158	1316	0.0122034	0.214099
chr15	77657504	77681144	PEAK1	.	9	16	0	1.05882	0.214099
chr2	136620176	136622733	MCM6	.	9	66	398	0.0387097	0.214099
chr19	5047486	5082515	KDM4B	.	9	181	28	0.0857143	0.214099
chr4	76573822	76581054	G3BP2	.	9	547	217	0.0235294	0.214099
chr12	69983264	69985939	CCT2	.	9	445	860	0.0137825	0.214099
chr5	32268806	32276848	MTMR12	.	9	83	143	0.0792952	0.214099
chr17	4186092	4200109	UBE2G1	.	9	123	335	0.0392157	0.214099
chr1	21295966	21329301	EIF4G3	.	9	51	187	0.0753138	0.214099
chr6	5404774	5431405	FARS2	.	9	43	16	0.3	0.214099
chr4	17816475	17816981	NCAPG	.	9	117	14	0.136364	0.214099
chr3	98487273	98492827	ST3GAL6	.	9	20	280	0.0598007	0.214099
chr6	76344422	76388643	SENP6	.	9	39	271	0.0578778	0.214099
chr6	44971389	44988369	SUPT3H	.	9	29	186	0.0833333	0.214099

## Sheet: LR+DNMTi
chrom	start	end	sense_gene	antisense_gene	Len +AZA junction	SA	SD	Len +AZA CTL	Len +AZA RPM
chr4	1905942	1936989	WHSC1	.	372	288	1365	0.449819	10.608
chr19	24014398	24016323	.	.	137	60	18	3.46835	3.90669
chr4	153332454	153333681	FBXW7	.	136	40	2	6.32558	3.87818
chr4	1905942	1920350	WHSC1	.	100	288	1498	0.111919	2.8516
chr6	4891946	4892613	CDYL	.	213	48	37	4.95349	6.07391
chr17	37933903	37934020	IKZF3	.	70	42	368	0.340633	1.99612
chr14	81297486	81307112	CEP128	.	131	160	288	0.583519	3.7356
chr18	9182379	9221997	ANKRD12	.	75	34	14	3.06122	2.1387
chr1	117944807	117963271	MAN1A2	.	135	357	31	0.694087	3.84966
chr12	1136913	1137738	ERC1	.	77	67	35	1.49515	2.19573
chr19	23541231	23545527	ZNF91	.	52	1	29	3.35484	1.48283
chr11	33307958	33309057	HIPK3	.	49	17	9	3.62963	1.39728
chr7	139415730	139416814	HIPK2	.	47	96	8	0.895238	1.34025
chr8	52773404	52773806	PCMTD1	.	202	181	108	1.3931	5.76023
chr14	23378691	23380612	RBM23	.	40	162	228	0.204604	1.14064
chr4	144464661	144465125	SMARCA5	.	90	342	83	0.422535	2.56644
chr16	30495147	30495584	ITGAL	.	21	256	85	0.122807	0.598836
chr11	130130750	130131824	ZBTB44	.	46	31	13	2.04444	1.31174
chr1	1586822	1650894	CDK11B	MMP23A	28	0	27	2	0.798448
chr14	97299803	97327072	VRK1	.	75	35	484	0.288462	2.1387
chr3	31617887	31621588	STT3B	.	36	292	124	0.172662	1.02658
chr1	1158623	1159348	SDF4	.	36	99	405	0.142574	1.02658
chr3	56626997	56628056	CCDC66	.	80	33	121	1.03226	2.28128
chr17	80521229	80526077	FOXK2	.	53	15	25	2.58537	1.51135
chr2	72945231	72960247	EXOC6B	.	40	12	53	1.21212	1.14064
chr4	73950965	73958017	ANKRD17	.	8	20	0	0.761905	0.228128
chr11	120345268	120348235	ARHGEF12	.	38	545	190	0.103261	1.08361
chr6	79752559	79770535	PHIP	.	73	126	45	0.848837	2.08167
chr1	155823066	155823597	GON4L	.	26	57	25	0.626506	0.741416
chr7	148543561	148544397	EZH2	.	5	73	8	0.121951	0.14258
chr15	64791491	64792365	ZNF609	.	48	5	5	8.72727	1.36877
chr7	99621041	99621930	ZKSCAN1	.	68	29	17	2.89362	1.93909
chr4	87967317	87968746	AFF1	.	38	70	6	0.987013	1.08361
chr1	117944807	117957453	MAN1A2	.	38	357	288	0.117647	1.08361
chr8	42761315	42798588	HOOK3	.	18	99	15	0.313043	0.513288
chr19	13039155	13039661	FARSA	.	43	33	110	0.597222	1.22619
chr22	42915719	42976365	.	SERHL2	20	45	9	0.727273	0.57032
chr14	81209418	81244390	CEP128	.	37	23	59	0.891566	1.05509
chr20	46252654	46262380	NCOA3	.	33	207	27	0.280851	0.941028
chr16	68155889	68160513	NFATC3	.	15	2	67	0.428571	0.42774
chr9	138773478	138774924	CAMSAP1	.	22	67	22	0.488889	0.627352
chr1	155644800	155649303	YY1AP1	.	27	137	22	0.3375	0.769932
chr12	69210591	69218431	MDM2	.	6	600	905	0.00796813	0.171096
chr5	122881110	122893258	CSNK1G3	.	30	19	76	0.625	0.85548
chr18	42529845	42533305	SETBP1	.	14	45	57	0.271845	0.399224
chr1	117944807	117948267	MAN1A2	.	133	357	374	0.363388	3.79263
chr10	70719561	70720005	DDX21	.	81	598	202	0.202247	2.3098
chr2	200233327	200298237	SATB2	.	26	4	3	6.5	0.741416
chr10	5836847	5842668	GDI2	.	59	627	775	0.0841055	1.68244
chr18	19345732	19359646	MIB1	.	38	106	45	0.5	1.08361
chr3	171965322	171969331	FNDC3B	.	24	85	65	0.317881	0.684384
chr4	1905942	1932497	WHSC1	.	21	288	1844	0.0196906	0.598836
chr18	9195548	9221997	ANKRD12	.	32	633	14	0.0987654	0.912512
chr5	109049220	109065214	MAN2A1	.	18	46	48	0.378947	0.513288
chr1	117944807	117984947	MAN1A2	.	69	357	20	0.365079	1.9676
chr2	37543379	37544322	PRKD3	.	36	9	20	2.4	1.02658
chr11	120343758	120348235	ARHGEF12	.	28	488	190	0.0824742	0.798448
chr16	80718434	80719026	CDYL2	.	24	15	45	0.786885	0.684384
chr12	1399017	1399178	ERC1	.	11	125	23	0.147651	0.313676
chr13	49712882	49720071	FNDC3A	.	5	41	47	0.11236	0.14258
chr6	16326624	16328701	ATXN1	.	3	12	13	0.230769	0.085548
chr6	87925620	87928449	ZNF292	.	8	15	14	0.533333	0.228128
chr9	114148656	114154104	KIAA0368	.	19	74	152	0.167401	0.541804
chr21	10985044	10998335	.	.	48	2	55	1.65517	1.36877
chr20	57014000	57016139	VAPB	.	12	16	65	0.292683	0.342192
chr1	151139409	151139890	TNFAIP8L2	.	14	158	403	0.0498221	0.399224
chr10	91511102	91522592	KIF20B	.	26	178	37	0.240741	0.741416
chr4	1918597	1920350	WHSC1	.	46	2266	1498	0.0244356	1.31174
chr3	157839891	157841780	RSRC1	.	64	97	162	0.492308	1.82502
chr17	45479497	45492285	EFCAB13	.	14	21	0	1.27273	0.399224
chr3	171969049	172028671	FNDC3B	.	21	730	131	0.0487239	0.598836
chr21	11038727	11058323	BAGE5	.	16	35	11	0.680851	0.456256
chr8	109462051	109462721	EMC2	.	23	801	237	0.0442733	0.655868
chr1	58971731	59004982	OMA1	.	20	49	24	0.540541	0.57032
chr10	7285519	7327916	SFMBT2	.	6	13	11	0.48	0.171096
chr15	41988272	41991357	MGA	.	27	66	34	0.534653	0.769932
chr3	56600621	56601081	CCDC66	.	11	99	29	0.170543	0.313676
chr6	77981056	77983024	.	.	7	1	5	2	0.199612
chr7	155465560	155473602	RBM33	.	39	52	59	0.696429	1.11212
chr12	116668337	116675510	MED13L	.	19	7	19	1.40741	0.541804
chr17	65941524	65972074	BPTF	.	6	14	14	0.413793	0.171096
chr20	30954186	30956926	ASXL1	.	20	28	18	0.851064	0.57032
chr20	43600718	43615937	STK4	.	14	62	57	0.233333	0.399224
chr11	95546095	95546753	CEP57	.	8	545	154	0.0228571	0.228128
chr9	33971648	33973235	UBAP2	.	3	46	7	0.111111	0.085548
chr8	103372298	103373854	UBR5	.	3	45	42	0.0681818	0.085548
chr1	155408117	155429689	ASH1L	.	22	12	92	0.419048	0.627352
chr4	178274461	178274882	NEIL3	.	41	9	25	2.34286	1.16916
chr12	69210591	69222711	MDM2	.	15	600	4403	0.0059952	0.42774
chr3	169863210	169867032	PHC3	.	22	68	53	0.360656	0.627352
chr8	61653817	61655656	CHD7	.	32	5	19	2.56	0.912512
chr8	109462051	109468159	EMC2	.	15	801	212	0.0295858	0.42774
chr19	33604672	33605325	GPATCH1	.	6	12	22	0.342857	0.171096
chr5	167915606	167921655	RARS	.	13	202	188	0.0664962	0.370708
chr10	126631025	126631876	ZRANB1	.	13	26	14	0.634146	0.370708
chr9	33953282	33963789	UBAP2	.	11	7	46	0.407407	0.313676
chr4	153332454	153391140	FBXW7	.	8	40	0	0.390244	0.228128
chrX	139865339	139866824	.	CDR1	25	0	0	50	0.7129
chr4	56277780	56284152	TMEM165	.	22	39	451	0.089613	0.627352
chr10	5815804	5842668	GDI2	.	36	745	775	0.0473373	1.02658
chr13	96409897	96416207	DNAJC3	.	31	114	544	0.0940819	0.883996
chr8	98698895	98703416	MTDH	.	8	8465	995	0.00169115	0.228128
chr3	17051165	17056403	PLCL2	.	25	38	42	0.617284	0.7129
chr19	8520288	8528570	HNRNPM	.	23	297	83	0.120735	0.655868
chr11	120916382	120930794	TBCEL	.	7	27	62	0.155556	0.199612
chr1	146724277	146731572	CHD1L	.	5	85	12	0.102041	0.14258
chr15	41961025	41962156	MGA	.	28	21	60	0.682927	0.798448
chr10	15875628	15889942	FAM188A	.	34	83	18	0.666667	0.969544
chr12	124071293	124074996	TMED2	.	30	1098	2308	0.0176108	0.85548
chr14	39648294	39648666	PNN	.	40	218	195	0.193237	1.14064
chr15	87949593	87966067	.	.	22	38	11	0.88	0.627352
chr20	33065576	33067594	ITCH	.	12	341	46	0.0618557	0.342192
chr4	39739039	39776553	UBE2K	.	5	147	65	0.0469484	0.14258
chr17	37933903	37934263	IKZF3	.	9	42	0	0.418605	0.256644
chr3	50102463	50103935	RBM6	.	5	98	147	0.0406504	0.14258
chr12	46622935	46637097	SLC38A1	.	20	146	162	0.12945	0.57032
chr12	120592773	120593523	GCN1	.	11	59	56	0.189655	0.313676
chr1	31465236	31468067	PUM1	.	26	3	191	0.266667	0.741416
chr11	72695132	72700142	FCHSD2	.	10	14	57	0.277778	0.28516
chr5	41794104	41807540	OXCT1	.	25	192	185	0.132275	0.7129
chr10	28872327	28884970	WAC	.	9	94	252	0.0518732	0.256644
chr18	8718421	8720494	MTCL1	.	13	17	22	0.65	0.370708
chr12	69222550	69230529	MDM2	.	9	907	381	0.0139643	0.256644
chr7	128655032	128658211	TNPO3	.	18	27	32	0.6	0.513288
chr17	57808781	57816308	VMP1	.	20	229	218	0.0892857	0.57032
chr16	68155889	68157024	NFATC3	.	14	2	39	0.666667	0.399224
chr5	68470703	68471364	CCNB1	.	18	309	100	0.0878049	0.513288
chr10	7318853	7327916	SFMBT2	.	16	7	11	1.68421	0.456256
chr7	99090662	99092254	ZNF394	.	16	0	41	0.761905	0.456256
chr1	155691307	155695810	DAP3	.	7	370	127	0.0281124	0.199612
chr4	48371865	48385801	SLAIN2	.	16	27	9	0.864865	0.456256
chr3	171969049	172016577	FNDC3B	.	28	730	736	0.0381731	0.798448
chr18	44526019	44526886	.	.	8	10	1	1.33333	0.228128
chr11	108098321	108100050	ATM	.	12	117	81	0.120603	0.342192
chr10	102683731	102685776	SLF2	.	26	49	65	0.452174	0.741416
chr12	69644908	69656342	CPSF6	.	11	147	28	0.125	0.313676
chr5	6737622	6746540	PAPD7	.	5	9	12	0.454545	0.14258
chr6	158733082	158735300	TULP4	.	24	24	4	1.65517	0.684384
chr10	5827104	5842668	GDI2	.	38	61	775	0.0908005	1.08361
chr5	60768507	60768864	ZSWIM6	.	9	6	17	0.75	0.256644
chr10	105382226	105420872	SH3PXD2A	.	18	23	0	1.5	0.513288
chr5	109049220	109051965	MAN2A1	.	6	46	98	0.0827586	0.171096
chr8	22332466	22333137	PPP3CC	.	9	378	57	0.0412844	0.256644
chr21	46548316	46554747	ADARB1	.	4	13	44	0.137931	0.114064
chr5	137320945	137324004	FAM13B	.	4	22	14	0.216216	0.114064
chr18	19345732	19399607	MIB1	.	10	106	27	0.149254	0.28516
chr1	28907071	28907741	SNHG12	.	5	49	37	0.114943	0.14258
chr8	28013458	28019595	ELP3	.	7	125	265	0.0358056	0.199612
chr1	1601102	1666274	CDK11B	MMP23A	12	8	1	2.4	0.342192
chr12	46319924	46322642	SCAF11	.	4	74	41	0.0689655	0.114064
chr22	22160138	22162135	MAPK1	.	29	21	52	0.783784	0.826964
chr14	99924615	99932150	SETD3	.	16	9	5	2.13333	0.456256
chrX	134679347	134690225	INTS6L	.	13	39	33	0.356164	0.370708
chr20	60714130	60716000	PSMA7	.	21	188	379	0.0739437	0.598836
chr18	9204473	9221997	ANKRD12	.	23	105	14	0.383333	0.655868
chr7	24659670	24708279	MPP6	.	25	1	100	0.490196	0.7129
chr21	30693541	30702014	BACH1	.	15	17	57	0.4	0.42774
chrX	149962163	149984551	CD99L2	.	21	5	321	0.12844	0.598836
chr2	240929490	240946787	NDUFA10	.	10	53	87	0.141844	0.28516
chr16	3900297	3901010	CREBBP	.	11	8	23	0.6875	0.313676
chr15	87898779	87966067	.	.	15	17	11	1.03448	0.42774
chr8	98731276	98735263	MTDH	.	16	2055	12567	0.00218833	0.456256
chr14	81209418	81227957	CEP128	.	12	23	421	0.0539326	0.342192
chr20	46365446	46386207	SULF2	.	3	82	238	0.0186916	0.085548
chr1	8601272	8617582	RERE	.	4	18	8	0.296296	0.114064
chr11	108137897	108138069	ATM	.	0	0	0	0	0
chr3	196118683	196129890	UBXN7	.	7	19	14	0.411765	0.199612
chr14	23375403	23380612	RBM23	.	9	40	228	0.0669145	0.256644
chr13	49742748	49752790	FNDC3A	.	5	323	216	0.0185185	0.14258
chr1	231500072	231503382	EGLN1	.	2	0	120	0.0330579	0.057032
chr4	73956383	73958017	ANKRD17	.	9	20	0	0.857143	0.256644
chr1	41536266	41541123	SCMH1	.	18	22	10	1.09091	0.513288
chr1	28362054	28384605	EYA3	.	24	121	306	0.11215	0.684384
chr19	34921480	34929671	UBA2	.	10	243	43	0.0696864	0.28516
chr7	24663284	24708279	MPP6	.	13	14	100	0.226087	0.370708
chr2	172782046	172809519	HAT1	.	14	180	31	0.132075	0.399224
chr21	17135209	17138460	USP25	.	4	30	32	0.126984	0.114064
chr1	21083658	21100103	HP1BP3	.	14	29	227	0.108949	0.399224
chr7	151944986	151970952	KMT2C	.	0	0	0	0	0
chr4	129913321	129925031	SCLT1	.	13	65	9	0.346667	0.370708
chr20	30115286	30115853	HM13	.	17	216	0	0.156682	0.484772
chr2	231307651	231314970	SP100	.	8	84	14	0.161616	0.228128
chr11	118454523	118455359	ARCN1	.	3	1316	1049	0.00253593	0.085548
chr10	116879948	116889297	ATRNL1	.	18	12	53	0.545455	0.513288
chr9	88920106	88924932	ZCCHC6	.	9	40	52	0.193548	0.256644
chr1	35824525	35827390	ZMYM4	.	9	10	60	0.253521	0.256644
chr15	81262802	81274523	MESDC2	.	19	1	425	0.088993	0.541804
chr7	148716083	148718239	PDIA4	.	18	356	1780	0.016846	0.513288
chr4	1919867	1920350	WHSC1	.	19	2737	1498	0.00897073	0.541804
chr7	23015828	23023664	FAM126A	.	16	37	36	0.432432	0.456256
chr1	58971731	59002413	OMA1	.	11	49	86	0.161765	0.313676
chr1	115005725	115007010	TRIM33	.	12	12	33	0.521739	0.342192
chr16	4311779	4312702	TFAP4	.	5	1	100	0.0980392	0.14258
chr6	24416624	24418806	MRS2	.	9	125	71	0.0913706	0.256644
chr1	247319707	247323115	ZNF124	.	6	0	0	12	0.171096
chr15	41648236	41669502	NUSAP1	.	11	151	395	0.0402194	0.313676
chr15	63988322	64008672	HERC1	.	12	14	32	0.510638	0.342192
chr22	21288066	21288532	CRKL	.	0	0	0	0	0
chr18	48444479	48450582	ME2	.	8	1068	284	0.0118256	0.228128
chr2	203419974	203421254	BMPR2	.	9	30	17	0.375	0.256644
chr18	42281139	42339068	SETBP1	.	0	0	0	0	0
chr20	33057852	33069011	ITCH	.	2	114	230	0.0115942	0.057032
chr6	117010482	117026323	KPNA5	.	5	51	1	0.188679	0.14258
chr7	158552176	158557544	ESYT2	.	0	0	0	0	0
chr14	53464387	53510473	.	.	2	5	0	0.666667	0.057032
chr8	99718694	99719539	STK3	.	2	57	18	0.0526316	0.057032
chr20	34317233	34320057	RBM39	.	34	109	1044	0.0589255	0.969544
chr12	112371689	112381173	TMEM116	.	40	9	48	1.37931	1.14064
chr18	42281139	42281797	SETBP1	.	10	10	38	0.408163	0.28516
chr5	138699447	138700432	PAIP2	.	15	142	649	0.0378788	0.42774
chr11	120907213	120930794	TBCEL	.	12	40	62	0.23301	0.342192
chr2	72958135	72960247	EXOC6B	.	17	32	53	0.395349	0.484772
chr3	31617887	31641951	STT3B	.	13	292	202	0.0525253	0.370708
chr18	33606862	33613800	RPRD1A	.	14	196	133	0.0848485	0.399224
chr18	45391429	45423180	SMAD2	.	9	8	77	0.209302	0.256644
chr11	76174864	76183884	EMSY	.	18	44	23	0.529412	0.513288
chr1	65830317	65831879	DNAJC6	.	8	9	6	1	0.228128
chr2	122260742	122287901	CLASP1	.	14	4	37	0.666667	0.399224
chr2	173423435	173431661	PDK1	.	6	82	210	0.0409556	0.171096
chr19	19750893	19751380	GMIP	.	9	130	3	0.134328	0.256644
chr18	60206913	60217693	ZCCHC2	.	7	9	20	0.466667	0.199612
chr8	27151596	27151827	TRIM35	.	9	0	67	0.264706	0.256644
chrX	134679347	134683730	INTS6L	.	8	39	142	0.0879121	0.228128
chr4	2951660	2952972	NOP14	NOP14-AS1	14	268	168	0.0640732	0.399224
chr7	40027197	40027857	CDK13	.	11	5	58	0.34375	0.313676
chr10	105197771	105198565	PDCD11	.	11	46	73	0.183333	0.313676
chr7	99952765	99953427	STAG3L5P-PVRIG2P-PILRB	.	3	51	0	0.115385	0.085548
chr20	36685933	36694658	RPRD1B	.	12	56	16	0.328767	0.342192
chr20	34309661	34313077	RBM39	.	3	113	111	0.0266667	0.085548
chrX	19983161	19988416	CXorf23	.	10	7	0	2.5	0.28516
chr9	6420911	6434173	UHRF2	.	0	0	0	0	0
chrX	48024315	48123352	.	SSX5	0	0	0	0	0
chr6	7181356	7189555	RREB1	.	7	99	4	0.134615	0.199612
chr18	55278868	55283207	NARS	.	4	203	2127	0.003432	0.114064
chr15	77657504	77681144	PEAK1	.	0	0	0	0	0
chr2	136620176	136622733	MCM6	.	3	64	205	0.0222222	0.085548
chr19	5047486	5082515	KDM4B	.	8	86	6	0.172043	0.228128
chr4	76573822	76581054	G3BP2	.	7	305	120	0.0328638	0.199612
chr12	69983264	69985939	CCT2	.	0	0	0	0	0
chr5	32268806	32276848	MTMR12	.	6	19	142	0.0740741	0.171096
chr17	4186092	4200109	UBE2G1	.	4	34	126	0.0496894	0.114064
chr1	21295966	21329301	EIF4G3	.	6	31	74	0.113208	0.171096
chr6	5404774	5431405	FARS2	.	3	60	14	0.08	0.085548
chr4	17816475	17816981	NCAPG	.	0	0	0	0	0
chr3	98487273	98492827	ST3GAL6	.	0	0	0	0	0
chr6	76344422	76388643	SENP6	.	7	31	327	0.0389972	0.199612
chr6	44971389	44988369	SUPT3H	.	0	0	0	0	0
chr11	118656760	118657227	DDX6	.	9	25	24	0.36	0.256644
chr10	22193450	22209892	DNAJC1	.	7	1775	104	0.00744681	0.199612
chr5	32135677	32143986	GOLPH3	.	6	385	430	0.0147059	0.171096
chr6	7899808	7904956	BLOC1S5-TXNDC5	.	22	2189	7034	0.00477016	0.627352
chr22	50810448	50832564	PPP6R2	.	10	30	22	0.377358	0.28516
chr1	84376847	84412965	LOC101927587	.	14	57	10	0.411765	0.399224
chr5	65349233	65350779	ERBIN	.	11	72	19	0.23913	0.313676
chr10	112356155	112358048	SMC3	.	8	246	75	0.0496894	0.228128
chr4	39915230	39927553	PDS5A	.	9	68	110	0.100559	0.256644
chr12	69214104	69218431	MDM2	.	3	640	905	0.00388098	0.085548
chr6	13579682	13584457	SIRT5	.	17	5	2	4.25	0.484772
chr11	73418464	73429763	RAB6A	.	6	107	19	0.0944882	0.171096
chr2	58449076	58459247	FANCL	.	4	12	15	0.285714	0.114064
chr5	118433673	118450236	DMXL1	.	0	0	0	0	0
chr14	31139461	31144271	SCFD1	.	5	50	127	0.0561798	0.14258
chr5	80071512	80088663	MSH3	.	15	67	84	0.197368	0.42774
chr1	22816372	22818026	ZBTB40	.	10	29	23	0.377358	0.28516
chr10	22193450	22218070	DNAJC1	.	6	1775	177	0.00614439	0.171096
chr21	30698379	30702014	BACH1	.	2	26	57	0.047619	0.057032
chr17	40650941	40653322	ATP6V0A1	.	6	32	43	0.157895	0.171096
chr3	142455220	142467302	TRPC1	.	0	0	0	0	0
chr3	171969049	172025291	FNDC3B	.	6	730	119	0.0141176	0.171096
chr18	48450467	48466756	ME2	.	5	968	753	0.0058072	0.14258
chr9	20819794	20823114	FOCAD	.	4	36	30	0.119403	0.114064
chr8	42812236	42819617	HOOK3	.	5	29	321	0.02849	0.14258
chr2	45773870	45789895	SRBD1	.	13	14	5	1.3	0.370708
chr2	215609790	215646233	BARD1	.	10	47	64	0.178571	0.28516
chr3	123649948	123667979	CCDC14	.	5	68	73	0.0704225	0.14258
chr6	109215669	109225608	ARMC2	.	4	87	54	0.056338	0.114064
chr6	10703637	10705077	PAK1IP1	.	9	76	13	0.2	0.256644
chr7	72873865	72884813	BAZ1B	.	18	46	155	0.178218	0.513288
chr16	87782278	87795646	KLHDC4	.	3	23	3	0.222222	0.085548
chr1	14099572	14109326	PRDM2	.	4	46	8	0.145455	0.114064
chr17	62130139	62130731	ERN1	.	10	41	90	0.151515	0.28516
chr13	21742126	21742538	SKA3	.	0	0	0	0	0
chr14	53558502	53570574	DDHD1	.	4	44	94	0.057554	0.114064
chr7	152007050	152012423	KMT2C	.	5	20	27	0.208333	0.14258
chr1	1747194	1756938	GNB1	.	3	32	192	0.0266667	0.085548
chr16	19627435	19628130	C16orf62	.	5	6	7	0.714286	0.14258
chr10	116590610	116608496	FAM160B1	.	8	15	9	0.64	0.228128
chr7	104702610	104722244	KMT2E	.	0	0	0	0	0
chr7	129760588	129762042	KLHDC10	.	0	0	0	0	0
chr6	7904806	7904956	BLOC1S5-TXNDC5	.	4	7615	7034	0.000546075	0.114064
chr5	93978977	93990457	SLF1	.	2	2	14	0.235294	0.057032
chr9	128099296	128099870	GAPVD1	.	0	0	0	0	0
chr10	125780771	125806240	CHST15	.	0	0	0	0	0
chr1	155490890	155491409	ASH1L	.	2	35	9	0.0888889	0.057032
chr4	146744573	146770713	ZNF827	.	4	0	2	2.66667	0.114064
chr12	116674625	116675510	MED13L	.	0	0	0	0	0
chr6	7298155	7299056	SSR1	.	0	0	0	0	0
chr21	34614144	34635942	IFNAR2	.	0	0	0	0	0
chr16	58593707	58594266	CNOT1	.	0	0	0	0	0
chr4	36230203	36231267	ARAP2	.	0	0	0	0	0
chr1	154207066	154207767	UBAP2L	.	3	602	21	0.00961538	0.085548
chr8	28304687	28309883	FBXO16	.	0	0	0	0	0
chr14	80963811	80997230	CEP128	.	10	13	76	0.222222	0.28516
chr17	20107645	20109225	SPECC1	.	9	17	25	0.418605	0.256644
chr8	107691437	107696587	OXR1	.	25	511	1631	0.0233318	0.7129
chr12	46633461	46637097	SLC38A1	.	13	240	162	0.0645161	0.370708
chr18	54423813	54426184	WDR7	.	18	54	12	0.537313	0.513288
chr2	190656515	190682906	PMS1	.	12	21	28	0.48	0.342192
chr10	125798030	125806240	CHST15	.	10	16	90	0.186916	0.28516
chr5	102432244	102433485	GIN1	.	18	7	129	0.262774	0.513288
chr9	138741982	138758382	CAMSAP1	.	18	13	70	0.428571	0.513288
chr1	155896466	155896947	KIAA0907	.	16	225	274	0.064	0.456256
chr11	108098321	108138069	ATM	.	14	117	61	0.156425	0.399224
chr12	124904502	124915333	NCOR2	.	15	3	25	1.03448	0.42774
chr20	33057852	33080402	ITCH	.	12	114	163	0.0863309	0.342192
chr4	75040222	75091111	MTHFD2L	.	7	4	8	1.07692	0.199612
chr12	70193988	70195501	RAB3IP	.	10	14	9	0.833333	0.28516
chr20	35812582	35812776	RPN2	.	7	329	343	0.0208024	0.199612
chr10	112723882	112745523	SHOC2	.	4	4	171	0.0454545	0.114064
chr1	70758070	70781249	ANKRD13C	.	4	34	30	0.123077	0.114064
chr1	67423741	67428843	MIER1	.	9	75	52	0.140625	0.256644
chr7	87593948	87607727	ADAM22	.	9	1	11	1.38462	0.256644
chr5	179136873	179147561	CANX	.	8	2298	553	0.0056101	0.228128
chr1	161071837	161072165	PFDN2	.	4	701	268	0.00824742	0.114064
chr20	45891031	45905539	ZMYND8	.	9	90	55	0.123288	0.256644
chr18	53763305	53764426	.	LINC01539	12	7	4	2	0.342192
chrX	149983334	149984551	CD99L2	.	4	172	321	0.0161943	0.114064
chr2	200245086	200298237	SATB2	.	7	46	3	0.28	0.199612
chr2	239090705	239093928	ILKAP	.	4	9	34	0.181818	0.114064
chr15	63824845	63855207	USP3	.	14	35	6	0.666667	0.399224
chr8	42780699	42798588	HOOK3	.	2	416	15	0.00925926	0.057032
chr11	8474368	8486369	STK33	.	4	5	94	0.08	0.114064
chr11	120347369	120348235	ARHGEF12	.	0	0	0	0	0
chr5	65284462	65290692	ERBIN	.	4	40	16	0.140351	0.114064
chr16	69404385	69406258	TERF2	.	0	0	0	0	0
chr6	74190397	74191967	MTO1	.	10	206	24	0.0865801	0.28516
chr10	31661946	31676195	ZEB1	.	8	6	25	0.5	0.228128
chr2	215632205	215646233	BARD1	.	4	4	64	0.115942	0.114064
chr1	205585605	205593019	ELK4	.	0	0	0	0	0
chr16	18846213	18856973	SMG1	.	9	6	58	0.276923	0.256644
chr15	85223943	85234875	SEC11A	.	8	134	188	0.0495356	0.228128
chr9	103082546	103111654	TEX10	.	4	10	14	0.32	0.114064
chr7	33185853	33217203	BBS9	.	4	11	3	0.533333	0.114064
chr6	10702601	10702872	PAK1IP1	.	0	0	0	0	0
chr16	48587449	48596355	N4BP1	MIR548AE2	3	10	15	0.230769	0.085548
chr5	113740134	113740553	KCNN2	.	3	0	3	1.5	0.085548
chr17	80521229	80529746	FOXK2	.	3	15	10	0.230769	0.085548
chr16	70598967	70601439	SF3B3	.	5	61	109	0.0584795	0.14258
chrX	90669902	90673870	PABPC5-AS1	.	0	0	0	0	0
chr6	13632601	13644961	RANBP9	NOL7	0	0	0	0	0
chr12	1372199	1399178	ERC1	.	5	253	23	0.0361011	0.14258
chr11	32611092	32617593	EIF3M	.	2	328	189	0.00772201	0.057032
chr12	80187642	80215970	PPP1R12A	.	6	1	216	0.0550459	0.171096
chr5	178312614	178358327	ZFP2	.	14	11	0	2.33333	0.399224
chr8	124349864	124351686	ATAD2	.	5	132	41	0.0574713	0.14258
chr4	103225473	103236987	SLC39A8	.	0	0	0	0	0
chr19	5653125	5654467	SAFB	.	2	64	81	0.0273973	0.057032
chr17	40652724	40653322	ATP6V0A1	.	0	0	0	0	0
chr9	88211276	88248289	AGTPBP1	.	7	58	48	0.130841	0.199612
chr8	22899553	22900756	TNFRSF10B	.	0	0	0	0	0
chr20	42331129	42331543	MYBL2	.	0	0	0	0	0
chr3	185638891	185641772	TRA2B	.	3	158	462	0.00966184	0.085548
chr6	52132662	52134024	MCM3	.	6	442	382	0.0145455	0.171096
chr1	220179447	220180680	EPRS	RNU5F-1	5	258	353	0.0163399	0.14258
chr3	28051960	28070094	.	.	5	2	1	2.5	0.14258
chr1	35846859	35847359	ZMYM4	.	0	0	0	0	0
chr9	22046749	22097363	CDKN2B-AS1	.	0	0	0	0	0
chr5	179136873	179143295	CANX	.	0	0	0	0	0
chr11	77409531	77413540	RSF1	.	4	7	68	0.105263	0.114064
chr3	141228409	141248644	RASA2	.	0	0	0	0	0
chr15	101104896	101105470	.	.	2	0	4	0.8	0.057032
chrX	54013510	54014377	PHF8	.	0	0	0	0	0
chr7	127344892	127361454	SND1	.	3	109	211	0.0186916	0.085548
chr11	85707868	85742653	PICALM	.	3	4	31	0.166667	0.085548
chr1	154197559	154209612	UBAP2L	.	2	171	175	0.0115274	0.057032
chr12	1213915	1250953	ERC1	.	0	0	0	0	0
chr5	171482591	171484477	STK10	.	0	0	0	0	0
chr18	9182379	9216898	ANKRD12	.	0	0	0	0	0
chr7	91924202	91948826	ANKIB1	.	5	34	6	0.243902	0.14258
chr12	121858044	121861320	RNF34	.	2	231	0	0.0172414	0.057032
chr1	176524542	176526377	PAPPA2	.	0	0	0	0	0
chr8	68005777	68024300	CSPP1	.	0	0	0	0	0
chr11	68334481	68343511	PPP6R3	.	0	0	0	0	0
chr17	40880842	40882936	EZH1	.	0	0	0	0	0
chr15	72283443	72302788	MYO9A	.	0	0	0	0	0
chr6	109232101	109258202	ARMC2	ARMC2-AS1	9	54	304	0.0501393	0.256644
chr10	5741487	5756170	FAM208B	.	21	0	21	1.90909	0.598836
chrX	44383247	44386611	FUNDC1	.	10	0	127	0.15625	0.28516
chr1	52959282	52975384	ZCCHC11	.	19	70	93	0.231707	0.541804
chr6	92045595	92047935	.	.	10	0	3	5	0.28516
chr22	28910744	28915308	TTC28	.	15	0	4	6	0.42774
chr10	15858833	15889942	FAM188A	.	5	27	18	0.217391	0.14258
chr8	68044185	68049838	CSPP1	.	13	36	58	0.273684	0.370708
chrX	133607388	133627620	HPRT1	.	7	8	8	0.823529	0.199612
chr5	176370335	176385155	UIMC1	.	6	56	5	0.193548	0.171096
chr10	22171210	22209892	DNAJC1	.	10	70	104	0.114286	0.28516
chr9	33948371	33953472	UBAP2	.	12	93	17	0.216216	0.342192
chr8	142264087	142264728	SLC45A4	LOC105375787	10	0	0	20	0.28516
chr1	187272597	187298192	LINC01036	.	7	4	24	0.482759	0.199612
chr14	31416295	31425448	STRN3	.	11	153	94	0.0887097	0.313676
chr19	58772216	58775042	ZNF544	.	13	24	0	1.04	0.370708
chr12	69218142	69222711	MDM2	.	2	1758	4403	0.00064914	0.057032
chr14	81223235	81244390	CEP128	.	12	114	59	0.137931	0.342192
chr20	34300940	34313077	RBM39	.	17	68	111	0.188889	0.484772
chr1	51032748	51061888	FAF1	.	6	80	90	0.0701754	0.171096
chr9	103261046	103279053	MSANTD3	.	5	29	21	0.196078	0.14258
chr9	37126308	37147442	ZCCHC7	.	2	66	1	0.0588235	0.057032
chr2	200213423	200298237	SATB2	.	0	0	0	0	0
chr4	54280781	54294350	FIP1L1	.	10	56	44	0.19802	0.28516
chr3	169889160	169896726	PHC3	.	3	68	7	0.0789474	0.085548
chr7	127013395	127017383	ZNF800	.	12	1	17	1.26316	0.342192
chr21	37711076	37717005	MORC3	.	8	0	27	0.571429	0.228128
chr20	43607083	43615937	STK4	.	0	0	0	0	0
chrX	135323318	135326954	MAP7D3	.	7	76	399	0.0294118	0.199612
chr20	47570092	47580435	ARFGEF2	.	7	257	28	0.048951	0.199612
chr15	89656955	89659752	ABHD2	.	7	103	82	0.0752688	0.199612
chr15	49528047	49531564	GALK2	.	0	0	0	0	0
chr20	47691321	47707559	CSE1L	.	11	1436	216	0.0133091	0.313676
chr11	116627861	116629123	BUD13	.	7	6	236	0.0576132	0.199612
chr17	35310185	35311207	AATF	.	13	145	35	0.143646	0.370708
chr13	96636057	96651561	UGGT2	.	5	33	0	0.294118	0.14258
chr19	24014398	24017206	.	.	6	60	2	0.190476	0.171096
chr8	48866179	48869991	PRKDC	.	0	0	0	0	0
chr11	117150623	117150975	RNF214	.	5	104	18	0.0813008	0.14258
chr17	46189392	46190763	SNX11	.	7	8	3	1.16667	0.199612
chr3	47651555	47719801	SMARCC1	.	12	68	209	0.0863309	0.342192
chr15	93543741	93558139	CHD2	.	10	11	22	0.588235	0.28516
chr1	174241551	174274265	RABGAP1L	.	6	370	74	0.0269663	0.171096
chrX	79962925	79975155	BRWD3	.	3	64	65	0.0461538	0.085548
chr5	70798425	70808255	BDP1	.	6	35	76	0.107143	0.171096
chr4	178274461	178281831	NEIL3	.	5	9	7	0.588235	0.14258
chr12	32480394	32481489	BICD1	.	10	2	3	3.33333	0.28516
chr10	32740519	32762951	CCDC7	.	8	14	7	0.727273	0.228128
chr10	70404454	70406762	TET1	.	5	2	2	2	0.14258
chr5	14673750	14693203	OTULIN	.	6	5	0	2	0.171096
chr2	61118817	61149134	REL	.	0	0	0	0	0
chr6	20546576	20548936	CDKAL1	.	3	22	48	0.084507	0.085548
chr1	162535801	162567648	UAP1	.	8	2541	305	0.00561995	0.228128
chr1	1747194	1770677	GNB1	.	2	32	25	0.0689655	0.057032
chr20	62407030	62422143	ZBTB46	.	8	1	0	8	0.228128
chr10	12123470	12162266	DHTKD1	.	3	4	9	0.428571	0.085548
chr9	96233422	96261168	FAM120A	.	5	51	9	0.163934	0.14258
chr7	23224688	23226765	NUPL2	.	0	0	0	0	0
chr7	104714065	104717880	KMT2E	.	2	75	19	0.0421053	0.057032
chr15	73064123	73067438	ADPGK	.	4	64	126	0.0418848	0.114064
chr1	21295966	21307720	EIF4G3	.	0	0	0	0	0
chr7	117825700	117828459	LSM8	.	0	0	0	0	0
chr5	132227855	132228810	AFF4	.	0	0	0	0	0
chr2	70451685	70457986	TIA1	.	0	0	0	0	0
chr17	7402357	7402810	POLR2A	.	0	0	0	0	0
chr14	81405728	81408724	.	.	4	72	12	0.0941176	0.114064
chr16	12060051	12061700	TNFRSF17	.	0	0	0	0	0
chr7	156956503	156963144	UBE3C	.	3	120	177	0.0201342	0.085548
chr4	83795763	83803093	SEC31A	.	4	9	105	0.0695652	0.114064
chr1	168007608	168037701	DCAF6	.	5	328	51	0.0263158	0.14258
chr11	34978930	35006275	PDHX	.	2	468	89	0.00716846	0.057032
chr4	106367539	106377902	PPA2	.	2	429	98	0.00757576	0.057032
chr18	48444479	48458730	ME2	.	3	1068	127	0.00501672	0.085548
chr16	88008653	88017865	BANP	.	2	12	23	0.111111	0.057032
chr2	113057425	113089859	ZC3H6	.	0	0	0	0	0
chr2	48061717	48062010	FBXO11	.	0	0	0	0	0
chr10	14938844	14939516	SUV39H2	.	4	24	110	0.0592593	0.114064
chr8	119388020	119391939	SAMD12	.	0	0	0	0	0
chr2	85270686	85276771	KCMF1	.	3	45	132	0.0337079	0.085548
chr17	29483000	29497015	NF1	.	5	27	6	0.294118	0.14258
chr14	61275042	61346553	MNAT1	.	3	124	28	0.0392157	0.085548
chr14	58785259	58796887	ARID4A	.	0	0	0	0	0
chr13	35883664	35926460	NBEA	.	0	0	0	0	0
chr11	118997644	118997835	HINFP	.	0	0	0	0	0
chr9	78682870	78722267	PCSK5	.	5	42	3	0.217391	0.14258
chr10	27431315	27434519	YME1L1	.	2	52	74	0.0314961	0.057032
chr1	213037066	213058738	FLVCR1	.	0	0	0	0	0
chr20	49551566	49571822	DPM1	ADNP-AS1	0	0	0	0	0
chr1	97235258	97250810	PTBP2	.	0	0	0	0	0
chr15	93543741	93552553	CHD2	.	0	0	0	0	0
chr4	10099334	10105610	WDR1	.	0	0	0	0	0
chr17	4186092	4210418	UBE2G1	.	0	0	0	0	0
chr8	98698895	98735263	MTDH	.	0	0	0	0	0
chr12	51173922	51203372	ATF1	.	0	0	0	0	0
chr3	171944660	171969331	FNDC3B	.	0	0	0	0	0
chr7	102957276	102960125	DNAJC2	.	0	0	0	0	0
chr6	130631011	130706381	.	SAMD3	0	0	0	0	0
chr22	29193064	29195141	XBP1	.	0	0	0	0	0
chr21	47768925	47769734	PCNT	.	0	0	0	0	0
chr8	48003023	48045390	.	.	0	0	0	0	0
chr5	41794104	41801172	OXCT1	.	0	0	0	0	0
chr2	209045468	209051785	C2orf80	.	0	0	0	0	0
chr15	43067332	43109295	TTBK2	.	0	0	0	0	0
chr3	125032151	125050082	ZNF148	.	7	35	147	0.0765027	0.199612
chr11	34093272	34098189	CAPRIN1	.	22	83	411	0.0888889	0.627352
chr1	52981562	52992045	ZCCHC11	.	13	93	51	0.17931	0.370708
chrX	53672262	53681075	HUWE1	.	15	74	226	0.0996678	0.42774
chr2	122363276	122363756	CLASP1	.	16	38	53	0.347826	0.456256
chr2	136432901	136437894	R3HDM1	.	8	156	67	0.0714286	0.228128
chr11	8435041	8486369	STK33	.	11	9	94	0.211538	0.313676
chr2	191765289	191789319	GLS	.	10	27	26	0.37037	0.28516
chr17	60061531	60062451	MED13	.	11	15	20	0.611111	0.313676
chr9	127670655	127674305	GOLGA1	.	4	0	102	0.0776699	0.114064
chr8	128902834	128903244	PVT1	.	2	8	7	0.25	0.057032
chr6	87920168	87928449	ZNF292	.	8	0	14	1.06667	0.228128
chr2	64778576	64780543	AFTPH	.	6	51	33	0.141176	0.171096
chr6	158703294	158735300	.	.	5	5	4	1	0.14258
chr7	38050522	38053183	.	.	8	2	2	3.2	0.228128
chr12	116668237	116675510	MED13L	.	9	0	19	0.9	0.256644
chr18	13048857	13059311	CEP192	.	4	118	2	0.0661157	0.114064
chr7	23650789	23651172	CCDC126	.	5	11	24	0.277778	0.14258
chr18	51804072	51813781	POLI	.	9	78	15	0.191489	0.256644
chr18	13048857	13073184	CEP192	.	16	118	7	0.253968	0.456256
chr11	8457040	8486369	STK33	.	6	35	94	0.0923077	0.171096
chr21	34614144	34625135	IFNAR2	.	11	3	44	0.458333	0.313676
chr10	117221450	117228839	ATRNL1	.	6	49	11	0.196721	0.171096
chr5	109152973	109159538	MAN2A1	.	11	128	259	0.056701	0.313676
chr1	29068914	29070498	YTHDF2	.	4	23	2	0.307692	0.114064
chr1	151060665	151090615	GABPB2	.	3	78	2	0.0740741	0.085548
chr8	71071739	71075089	NCOA2	.	8	39	1	0.390244	0.228128
chr5	14673750	14681716	OTULIN	.	10	5	101	0.186916	0.28516
chr8	68005777	68007967	CSPP1	.	11	189	43	0.0944206	0.313676
chr3	113207791	113225452	SPICE1	.	9	17	17	0.514286	0.256644
chr12	1289705	1299218	ERC1	.	7	63	319	0.0365535	0.199612
chr20	39721111	39729993	TOP1	PLCG1-AS1	14	43	83	0.220472	0.399224
chr9	33996220	34017187	UBAP2	.	5	155	14	0.0588235	0.14258
chr1	224599128	224601037	WDR26	.	6	19	12	0.375	0.171096
chr2	100078957	100081447	REV1	.	4	15	0	0.5	0.114064
chr10	15875628	15885271	FAM188A	.	6	83	104	0.0638298	0.171096
chr8	37623043	37623873	PROSC	.	3	19	16	0.166667	0.085548
chr22	32874967	32881196	FBXO7	.	4	65	82	0.0540541	0.114064
chr6	42559888	42562042	UBR2	.	3	41	46	0.0681818	0.085548
chr2	61749745	61761038	XPO1	.	3	77	63	0.0425532	0.085548
chr12	69983264	69987393	CCT2	.	0	0	0	0	0
chr2	172782046	172844276	HAT1	.	12	180	651	0.0288462	0.342192
chr2	62100136	62103369	CCT4	.	5	1120	1210	0.00429	0.14258
chr7	24663284	24690331	MPP6	.	5	14	69	0.119048	0.14258
chr14	64065473	64066691	WDR89	.	10	0	46	0.425532	0.28516
chr13	33091993	33101669	N4BP2L2	.	5	22	16	0.25641	0.14258
chr14	50616725	50616948	SOS2	.	0	0	0	0	0
chr7	17908029	17915413	SNX13	.	5	33	64	0.102041	0.14258
chr1	110203786	110233186	GSTM2	.	0	0	0	0	0
chr5	43675612	43704502	NNT	.	3	94	0	0.0631579	0.085548
chr9	88284399	88327481	AGTPBP1	.	0	0	0	0	0
chr8	22332466	22370945	PPP3CC	.	10	378	741	0.0178571	0.28516
chr9	37126308	37127260	ZCCHC7	.	5	66	0	0.149254	0.14258
chr17	57808781	57851246	VMP1	.	8	229	20	0.064	0.228128
chr7	97820039	97823884	LMTK2	.	0	0	0	0	0
chr12	27867712	27877119	MRPS35	.	4	66	162	0.0349345	0.114064
chr14	81209418	81259454	CEP128	.	0	0	0	0	0
chr1	179972308	179975702	CEP350	.	6	66	102	0.0710059	0.171096
chr2	111423839	111427130	BUB1	.	5	200	61	0.0381679	0.14258
chr1	78267015	78280916	FAM73A	.	14	44	14	0.474576	0.399224
chr19	47767859	47768203	CCDC9	.	6	44	11	0.214286	0.171096
chr19	38631823	38633350	SIPA1L3	.	0	0	0	0	0
chr2	136467002	136467801	R3HDM1	.	0	0	0	0	0
chr9	123593608	123595734	PSMD5	.	4	12	16	0.275862	0.114064
chr1	172525008	172539870	SUCO	.	3	22	38	0.0983607	0.085548
chr9	35295692	35313986	UNC13B	.	9	6	26	0.545455	0.256644
chr11	94219089	94224131	MRE11A	.	0	0	0	0	0
chr6	17648037	17649531	NUP153	.	4	84	145	0.0347826	0.114064
chr9	130106513	130107756	GARNL3	.	9	41	3	0.4	0.256644
chr8	37971709	37976881	ASH2L	.	10	37	5	0.465116	0.28516
chr4	154315413	154318485	MND1	.	0	0	0	0	0
chr9	96233422	96238620	FAM120A	.	0	0	0	0	0
chr1	12335881	12338095	VPS13D	.	3	19	22	0.142857	0.085548
chr18	12999419	13030607	CEP192	.	5	7	108	0.0862069	0.14258
chr10	105767934	105778666	SLK	.	14	316	119	0.0642202	0.399224
chr15	44620882	44673174	CASC4	.	9	170	244	0.0433735	0.256644
chr9	77631183	77632364	CARNMT1	.	5	6	157	0.0609756	0.14258
chr4	113483526	113506881	ZGRF1	.	2	15	13	0.137931	0.057032
chr1	21076215	21100103	HP1BP3	.	4	171	227	0.0200501	0.114064
chr3	52238708	52240767	ALAS1	.	5	48	6	0.181818	0.14258
chr11	95546095	95552068	CEP57	.	6	545	100	0.0185759	0.171096
chr20	34304661	34313077	RBM39	.	8	253	111	0.0438356	0.228128
chr22	41568502	41569788	EP300	.	6	71	6	0.153846	0.171096
chr3	119219541	119232566	TIMMDC1	.	4	62	788	0.00940071	0.114064
chr19	12825634	12826553	TNPO2	.	0	0	0	0	0
chr10	103552595	103570071	MGEA5	.	2	13	20	0.117647	0.057032
chr3	33725850	33731424	CLASP2	.	0	0	0	0	0
chr14	102661274	102676199	WDR20	.	4	14	3	0.444444	0.114064
chr2	69565029	69573131	GFPT1	.	0	0	0	0	0
chr8	38677039	38678153	TACC1	.	6	22	16	0.307692	0.171096
chr2	61710091	61717911	XPO1	.	4	186	119	0.0261438	0.114064
chr15	50878588	50884823	TRPM7	.	5	30	25	0.178571	0.14258
chr9	33351557	33352717	NFX1	.	3	4	28	0.181818	0.085548
chrX	10031484	10066619	WWC3	.	3	8	6	0.4	0.085548
chr7	103801519	103808973	ORC5	.	5	16	215	0.0431034	0.14258
chr6	7895338	7904956	BLOC1S5-TXNDC5	.	3	1227	7034	0.000726216	0.085548
chr6	18160113	18166609	KDM1B	.	6	7	3	1.09091	0.171096
chr4	106345352	106377902	PPA2	.	4	235	98	0.0239521	0.114064
chr1	35846859	35854683	ZMYM4	.	0	0	0	0	0
chr12	69229608	69230529	MDM2	.	5	4407	381	0.00208812	0.14258
chr8	48955592	48962538	UBE2V2	.	0	0	0	0	0
chr3	49016914	49017929	ARIH2	.	0	0	0	0	0
chr2	17846769	17927218	SMC6	.	0	0	0	0	0
chr1	150997086	150998149	PRUNE	.	0	0	0	0	0
chr9	111819470	111826847	TMEM245	.	7	15	77	0.150538	0.199612
chr2	61505299	61508377	USP34	.	3	11	15	0.222222	0.085548
chr19	24015450	24015618	.	.	0	0	0	0	0
chr7	138951078	138957186	UBN2	.	2	13	24	0.105263	0.057032
chr21	38792600	38802702	DYRK1A	.	3	12	1	0.428571	0.085548
chr20	47691321	47706283	CSE1L	.	4	1436	697	0.00374883	0.114064
chr13	26974589	26975761	CDK8	.	5	14	12	0.37037	0.14258
chr4	39739039	39779430	UBE2K	.	0	0	0	0	0
chr10	32308785	32310215	KIF5B	.	0	0	0	0	0
chrX	64295353	64295792	.	.	0	0	0	0	0
chr7	128845043	128846428	SMO	.	0	0	0	0	0
chr4	24572276	24578301	DHX15	.	3	121	555	0.00886263	0.085548
chr5	118417268	118450236	DMXL1	.	0	0	0	0	0
chr3	152132729	152165562	MBNL1	.	0	0	0	0	0
chr22	25771779	25777545	LRP5L	.	4	0	2	2.66667	0.114064
chr18	56363597	56367823	MALT1	.	3	20	4	0.24	0.085548
chr9	34241182	34242106	UBAP1	.	0	0	0	0	0
chr17	35931889	35945538	SYNRG	.	3	8	63	0.0833333	0.085548
chr14	53622960	53656654	.	.	0	0	0	0	0
chr2	128520635	128528578	WDR33	.	3	65	14	0.075	0.085548
chr17	60038227	60040332	MED13	.	3	19	104	0.0483871	0.085548
chr6	64389900	64395812	PHF3	.	3	93	25	0.0504202	0.085548
chr3	183435438	183446639	YEATS2	.	0	0	0	0	0
chr20	34450934	34459751	PHF20	.	4	36	21	0.137931	0.114064
chr1	244582061	244583598	ADSS	.	0	0	0	0	0
chr11	102701462	102703637	WTAPP1	.	0	0	0	0	0
chr10	74790028	74828741	P4HA1	.	0	0	0	0	0
chr18	2775731	2784619	SMCHD1	.	0	0	0	0	0
chr16	69395306	69402385	TERF2	.	0	0	0	0	0
chr1	231079551	231097049	TTC13	.	0	0	0	0	0
chr9	88925620	88934585	ZCCHC6	.	0	0	0	0	0
chr9	271626	289581	DOCK8	.	0	0	0	0	0
chr20	6077548	6078278	FERMT1	.	0	0	0	0	0
chr1	110125058	110129504	GNAI3	.	0	0	0	0	0
chr1	155408117	155408859	ASH1L	.	10	12	7	1	0.28516
chr18	12999419	13019205	CEP192	.	17	7	8	2.125	0.484772
chr18	48444479	48466756	ME2	.	16	1068	753	0.0175631	0.456256
chr2	48555699	48573890	FOXN2	.	14	14	22	0.756757	0.399224
chr1	45223227	45223812	KIF2C	.	14	106	53	0.175	0.399224
chr16	47143393	47165936	NETO2	.	13	22	22	0.577778	0.370708
chr5	56160560	56161804	MAP3K1	.	14	22	8	0.903226	0.399224
chr18	74561481	74563895	ZNF236	.	4	2	10	0.615385	0.114064
chr11	32948702	32956981	QSER1	.	9	0	4	3.6	0.256644
chr17	27613009	27614734	NUFIP2	.	5	39	223	0.0380228	0.14258
chr2	99802639	99812219	MRPL30	.	14	103	9	0.247788	0.399224
chr3	43341245	43345284	SNRK	.	10	1	10	1.66667	0.28516
chr1	92798947	92846430	RPAP2	.	11	9	2	1.83333	0.313676
chr11	119002244	119003929	HINFP	.	8	37	14	0.307692	0.228128
chr10	32197099	32199491	ARHGAP12	.	7	1	1	4.66667	0.199612
chr1	9991948	9994918	LZIC	.	4	9	10	0.4	0.114064
chr16	70294946	70296427	AARS	.	12	182	250	0.0554273	0.342192
chr22	24698162	24709434	SPECC1L	.	13	21	88	0.236364	0.370708
chr11	108586605	108594189	DDX10	.	4	81	131	0.0375587	0.114064
chr3	138289159	138291774	CEP70	.	10	79	18	0.204082	0.28516
chr11	70200406	70202360	PPFIA1	.	5	8	17	0.384615	0.14258
chr15	67524151	67529158	AAGAB	.	2	70	5	0.0526316	0.057032
chr10	126628942	126631876	.	.	4	3	14	0.444444	0.114064
chr6	108243000	108250718	SEC63	.	3	18	17	0.166667	0.085548
chr3	196817782	196846401	DLG1	.	5	260	65	0.0306748	0.14258
chr17	35640167	35646430	ACACA	.	16	4	12	1.88235	0.456256
chr3	141228409	141259451	RASA2	.	5	2	16	0.526316	0.14258
chr3	52771601	52775515	NEK4	.	19	18	23	0.904762	0.541804
chr2	173435453	173460751	PDK1	.	2	268	38	0.0130293	0.057032
chr2	135010665	135012215	.	.	0	0	0	0	0
chr15	93467550	93472321	CHD2	.	11	54	159	0.102804	0.313676
chr10	7409610	7412337	SFMBT2	.	16	12	67	0.4	0.456256
chr9	98740342	98766983	ERCC6L2	.	0	0	0	0	0
chr8	101299728	101300495	RNF19A	.	4	191	97	0.0276817	0.114064
chr8	42819453	42873637	HOOK3	.	5	205	0	0.0485437	0.14258
chr4	106613132	106614643	INTS12	.	7	51	117	0.0828402	0.199612
chr2	190593385	190609514	ANKAR	.	9	5	0	3	0.256644
chr6	161455290	161471011	MAP3K4	.	4	4	13	0.444444	0.114064
chr6	90052042	90053475	UBE2J1	.	4	773	632	0.0056899	0.114064
chr6	87925620	87943245	ZNF292	.	4	15	1	0.470588	0.114064
chr14	93760203	93762503	BTBD7	.	3	10	4	0.4	0.085548
chr1	156286956	156287338	CCT3	.	3	798	1987	0.00215363	0.085548
chr9	88190229	88261333	AGTPBP1	.	7	6	42	0.285714	0.199612
chr6	109249290	109258202	ARMC2	.	0	0	0	0	0
chr11	118422500	118430579	IFT46	.	3	25	57	0.0722892	0.085548
chr18	48702264	48703946	MEX3C	.	5	0	85	0.116279	0.14258
chr10	225933	295028	ZMYND11	.	8	50	22	0.219178	0.228128
chr18	39607406	39629569	PIK3C3	.	3	217	132	0.0171429	0.085548
chr7	73100965	73101425	WBSCR22	.	0	0	0	0	0
chr1	180953812	180962561	STX6	.	4	3	12	0.5	0.114064
chr14	61262934	61285565	MNAT1	.	10	146	133	0.0714286	0.28516
chr1	155365249	155429689	ASH1L	POU5F1P4	0	0	0	0	0
chr1	150202905	150204264	ANP32E	.	4	2176	115	0.0034904	0.114064
chr3	47466974	47470160	SCAP	.	4	4	18	0.347826	0.114064
chr19	5604593	5604947	SAFB2	.	2	94	21	0.0344828	0.057032
chr6	108225832	108246136	SEC63	.	5	10	37	0.208333	0.14258
chr17	40879652	40882936	EZH1	.	0	0	0	0	0
chr15	91524113	91525211	PRC1	PRC1-AS1	6	193	238	0.0277778	0.171096
chr12	89853414	89866052	POC1B	.	8	33	2	0.444444	0.228128
chr13	78293666	78327493	SLAIN1	.	6	35	1	0.324324	0.171096
chr5	142779220	142780417	NR3C1	.	5	17	55	0.136986	0.14258
chr11	107916996	107925682	CUL5	.	2	31	21	0.0754717	0.057032
chr9	110062421	110087285	RAD23B	.	0	0	0	0	0
chr4	88104354	88116842	KLHL8	.	3	58	17	0.0789474	0.085548
chr17	76187050	76188866	AFMID	.	3	33	0	0.176471	0.085548
chr17	49340634	49346265	UTP18	.	3	43	30	0.0810811	0.085548
chr3	3819408	3830758	.	.	4	0	0	8	0.114064
chr2	190670377	190682906	PMS1	.	2	16	28	0.0888889	0.057032
chrX	72797242	72804408	CHIC1	.	6	0	7	1.5	0.171096
chr11	6962801	6977013	ZNF215	.	5	33	12	0.217391	0.14258
chr11	68318588	68331900	PPP6R3	.	9	171	15	0.0962567	0.256644
chr15	41036244	41037457	RMDN3	.	0	0	0	0	0
chr14	81329100	81366373	CEP128	.	2	285	68	0.0112994	0.057032
chr15	72338064	72338975	MYO9A	.	3	19	19	0.153846	0.085548
chr7	77407654	77408131	RSBN1L	.	0	0	0	0	0
chr1	230313963	230339036	GALNT2	.	4	322	9	0.0240964	0.114064
chr5	38991050	39021238	RICTOR	.	3	41	8	0.12	0.085548
chr19	8520288	8539128	HNRNPM	.	0	0	0	0	0
chr11	85961337	85967554	EED	.	0	0	0	0	0
chr10	120488806	120489922	CACUL1	.	0	0	0	0	0
chr10	116879948	116931050	ATRNL1	.	5	12	6	0.526316	0.14258
chr1	149931602	149936274	OTUD7B	.	0	0	0	0	0
chr10	114286845	114298089	VTI1A	.	0	0	0	0	0
chr2	55559701	55562300	CCDC88A	.	6	13	103	0.102564	0.171096
chr4	54292038	54310270	FIP1L1	.	0	0	0	0	0
chr5	14741935	14758707	ANKH	.	2	3	46	0.08	0.057032
chr14	31404368	31425448	STRN3	.	0	0	0	0	0
chr6	82900789	82914675	IBTK	.	4	44	117	0.0493827	0.114064
chr9	33293677	33295425	NFX1	.	2	1	48	0.08	0.057032
chr20	35651052	35684059	RBL1	.	0	0	0	0	0
chr5	619104	620376	CEP72	.	0	0	0	0	0
chr9	5968018	5988545	KIAA2026	.	5	14	25	0.25	0.14258
chr7	27824781	27839709	TAX1BP1	.	2	432	360	0.00504414	0.057032
chr21	40619626	40630598	BRWD1	.	4	38	100	0.057554	0.114064
chr17	80842020	80861354	TBCD	.	0	0	0	0	0
chr16	67644726	67646024	CTCF	.	3	90	17	0.0555556	0.085548
chr1	162535801	162570693	UAP1	.	3	2541	18	0.00234375	0.085548
chrX	64271341	64295792	.	.	5	0	0	10	0.14258
chr7	18705835	18706099	HDAC9	.	4	45	1	0.170213	0.114064
chr3	56694758	56707753	FAM208A	.	5	27	15	0.232558	0.14258
chr2	240929490	240954277	NDUFA10	.	2	53	180	0.017094	0.057032
chr2	160602280	160605414	MARCH7	.	0	0	0	0	0
chr18	42281139	42283072	SETBP1	.	0	0	0	0	0
chr6	137015277	137019820	MAP3K5	.	0	0	0	0	0
chr8	101281012	101300495	RNF19A	.	0	0	0	0	0
chr6	47251673	47254331	TNFRSF21	.	0	0	0	0	0
chr11	124517260	124518071	SIAE	.	0	0	0	0	0
chr6	90916287	90981660	BACH2	.	0	0	0	0	0
chr15	79748439	79761487	KIAA1024	.	0	0	0	0	0
chr7	102944288	102944937	PMPCB	.	2	251	34	0.013986	0.057032
chr3	141231004	141259451	RASA2	.	0	0	0	0	0
chr1	202724398	202733273	KDM5B	.	0	0	0	0	0
chr8	101271334	101300495	RNF19A	.	0	0	0	0	0
chr6	76368977	76388643	SENP6	.	0	0	0	0	0
chr3	172013152	172028671	FNDC3B	.	6	53	131	0.0648649	0.171096
chr7	91924202	91957214	ANKIB1	.	0	0	0	0	0
chr19	11223953	11224438	LDLR	.	0	0	0	0	0
chr12	1345934	1399178	ERC1	.	0	0	0	0	0
chr3	101535638	101540594	NXPE3	.	0	0	0	0	0
chr20	42331129	42333998	MYBL2	.	3	78	192	0.0221402	0.085548
chr20	33954359	33971936	UQCC1	.	2	112	147	0.0153846	0.057032
chr12	112513481	112516545	NAA25	.	3	86	47	0.0447761	0.085548
chr2	210968827	211019335	KANSL1L	.	0	0	0	0	0
chr9	140458885	140459606	DPH7	.	0	0	0	0	0
chr7	122047593	122056218	CADPS2	.	2	12	161	0.0229885	0.057032
chr18	60223435	60232329	ZCCHC2	.	0	0	0	0	0
chr11	34978930	34999729	PDHX	.	0	0	0	0	0
chr18	39595439	39609405	PIK3C3	.	0	0	0	0	0
chr12	124856567	124862930	NCOR2	.	3	4	11	0.375	0.085548
chr7	97820925	97823884	LMTK2	.	0	0	0	0	0
chr6	110048311	110064975	FIG4	.	3	75	7	0.0722892	0.085548
chr14	39620949	39628754	TRAPPC6B	.	2	60	23	0.047619	0.057032
chr7	152007050	152055760	KMT2C	.	0	0	0	0	0
chr5	151169883	151170623	G3BP1	.	3	178	33	0.0283019	0.085548
chr8	98673299	98718978	MTDH	.	0	0	0	0	0
chr5	176468126	176477937	ZNF346	.	0	0	0	0	0
chr20	25394425	25405963	GINS1	.	2	42	14	0.0701754	0.057032
chr19	32847521	32851524	ZNF507	.	3	55	14	0.0857143	0.085548
chr18	72997402	73000603	TSHZ1	.	0	0	0	0	0
chr14	89178614	89181539	EML5	.	2	1	11	0.307692	0.057032
chr9	123230137	123253755	CDK5RAP2	.	2	75	133	0.0191388	0.057032
chr6	142487364	142510671	VTA1	.	0	0	0	0	0
chrX	109263579	109352374	TMEM164	.	0	0	0	0	0
chr9	130947825	130950213	CIZ1	.	3	199	22	0.027027	0.085548
chr8	34030494	34042423	.	.	0	0	0	0	0
chr6	56416981	56479282	DST	.	0	0	0	0	0
chr2	175976295	175986268	ATF2	.	0	0	0	0	0
chr19	11230767	11231198	LDLR	.	0	0	0	0	0
chr17	49048067	49064598	SPAG9	.	0	0	0	0	0
chr1	219366423	219414650	.	.	7	1	3	2.8	0.199612
chr1	10380100	10384953	KIF1B	.	0	0	0	0	0
chr2	15629017	15651474	NBAS	.	0	0	0	0	0
chr17	49057106	49064598	SPAG9	.	0	0	0	0	0
chr20	40141484	40162209	CHD6	.	0	0	0	0	0
chr7	131060182	131084192	MKLN1	.	0	0	0	0	0
chr1	51121113	51210447	FAF1	.	0	0	0	0	0
chr11	120317111	120330029	ARHGEF12	.	4	403	108	0.015625	0.114064
chr9	99220660	99220823	HABP4	.	0	0	0	0	0
chr7	143080248	143080415	ZYX	.	0	0	0	0	0
chr5	64747301	64769779	ADAMTS6	.	0	0	0	0	0
chr5	156945830	156947039	ADAM19	.	0	0	0	0	0
chr2	196544755	196548630	SLC39A10	.	4	32	4	0.216216	0.114064
chr1	235316020	235318427	RBM34	.	2	8	251	0.0153846	0.057032
chr1	1735857	1756938	GNB1	.	3	36	192	0.0262009	0.085548
chr11	18010143	18029623	SERGEF	.	0	0	0	0	0
chr3	196612021	196613565	SENP5	.	0	0	0	0	0
chr2	38201182	38231359	RMDN2	RMDN2-AS1	0	0	0	0	0
chr3	179418795	179426745	USP13	.	3	50	1	0.115385	0.085548
chr3	160131260	160141628	SMC4	.	0	0	0	0	0
chr18	19345732	19371518	MIB1	.	0	0	0	0	0
chr1	77620133	77635080	PIGK	.	2	20	26	0.0851064	0.057032
chr16	75425277	75448593	CFDP1	.	3	6	254	0.0229885	0.085548
chr15	49528047	49584734	GALK2	.	0	0	0	0	0
chr3	169840378	169847340	PHC3	.	0	0	0	0	0
chr3	133876964	133914026	RYK	.	0	0	0	0	0
chr17	61841375	61843554	CCDC47	.	0	0	0	0	0
chr1	155686796	155695810	DAP3	.	0	0	0	0	0
chr11	116734383	116744352	SIK3	.	0	0	0	0	0
chr3	12976947	12983365	IQSEC1	.	0	0	0	0	0
chr15	77046148	77067458	SCAPER	.	0	0	0	0	0
chr8	98698895	98725997	MTDH	.	0	0	0	0	0
chr4	128842678	128861152	MFSD8	.	0	0	0	0	0
chr3	178626309	178632350	.	.	0	0	0	0	0
chr2	55785910	55816092	PPP4R3B	.	0	0	0	0	0
chr21	10985044	10998332	.	.	0	0	0	0	0
chr19	45766370	45766625	MARK4	.	0	0	0	0	0
chr18	34740162	34753044	KIAA1328	.	0	0	0	0	0
chr15	41988272	42021547	MGA	.	2	66	42	0.0366972	0.057032
chr1	25551492	25554726	SYF2	.	0	0	0	0	0
chr1	150416726	150418877	RPRD2	.	0	0	0	0	0
chr11	108178623	108188248	ATM	.	0	0	0	0	0
chr10	70506917	70513834	CCAR1	.	0	0	0	0	0
chr10	66046225	66061412	.	.	0	0	0	0	0
chr10	38064271	38065503	.	.	0	0	0	0	0
chrX	67731690	67742759	YIPF6	.	0	0	0	0	0
chrX	62875373	62898452	ARHGEF9	.	0	0	0	0	0
chr9	133485340	133495845	FUBP3	.	0	0	0	0	0
chr9	125932180	125936121	STRBP	.	0	0	0	0	0
chr8	48746756	48752750	PRKDC	.	0	0	0	0	0
chr8	131172109	131193126	ASAP1	.	0	0	0	0	0
chr7	72951551	72957974	BCL7B	.	0	0	0	0	0
chr6	90082155	90097115	RRAGD	.	0	0	0	0	0
chr6	57072425	57075243	RAB23	.	0	0	0	0	0
chr6	111726672	111795682	REV3L	.	0	0	0	0	0
chr6	111632271	111652987	REV3L	.	0	0	0	0	0
chr4	187070326	187088416	FAM149A	.	0	0	0	0	0
chr4	151719232	151738409	LRBA	.	0	0	0	0	0
chr4	11330174	11339043	.	.	0	0	0	0	0
chr4	10447449	10447882	.	ZNF518B	0	0	0	0	0
chr3	52661288	52677359	PBRM1	.	0	0	0	0	0
chr3	49717347	49717550	.	APEH	0	0	0	0	0
chr2	47635599	47710111	MSH2	.	0	0	0	0	0
chr2	44204293	44216829	LRPPRC	.	0	0	0	0	0
chr2	206992520	207009750	NDUFS1	.	0	0	0	0	0
chr19	2438160	2438529	LMNB2	.	0	0	0	0	0
chr18	44407921	44409830	PIAS2	.	0	0	0	0	0
chr18	3534191	3582246	DLGAP1	.	0	0	0	0	0
chr17	35830503	35837130	TADA2A	.	0	0	0	0	0
chr17	2929301	2930364	RAP1GAP2	.	0	0	0	0	0
chr1	69550862	69554245	.	.	0	0	0	0	0
chr16	4484384	4487486	DNAJA3	.	0	0	0	0	0
chr1	5987708	6046387	NPHP4	.	0	0	0	0	0
chr14	81223235	81259454	CEP128	.	0	0	0	0	0
chr14	23375403	23378804	RBM23	.	0	0	0	0	0
chr13	100959445	100992513	PCCA	.	0	0	0	0	0
chr12	94804396	94806367	CEP83	.	0	0	0	0	0
chr1	197611840	197621445	DENND1B	.	0	0	0	0	0
chr11	76158113	76159724	EMSY	.	0	0	0	0	0
chr11	108204615	108205768	ATM	.	0	0	0	0	0
chr10	94396940	94410274	KIF11	.	0	0	0	0	0
chr10	75302560	75302889	USP54	.	0	0	0	0	0
chr10	12160747	12162266	DHTKD1	.	0	0	0	0	0
chr9	128419929	128434922	MAPKAP1	.	12	214	74	0.083045	0.342192
chr12	69214104	69222711	MDM2	.	21	640	4403	0.00832672	0.598836
chr13	113170753	113181798	TUBGCP3	.	10	0	10	1.81818	0.28516
chr8	98725889	98735263	MTDH	.	13	1474	12567	0.00185159	0.370708
chr17	71231614	71233134	C17orf80	.	11	40	23	0.34375	0.313676
chr14	21971315	21972024	METTL3	.	4	59	17	0.103896	0.114064
chr5	6604250	6605521	NSUN2	.	5	50	206	0.0389105	0.14258
chr2	128750760	128754065	SAP130	.	0	0	0	0	0
chr14	81362061	81372425	CEP128	.	8	161	96	0.0620155	0.228128
chr8	52758220	52773806	PCMTD1	.	15	21	108	0.230769	0.42774
chr4	1905942	1941505	WHSC1	.	7	288	188	0.0293501	0.199612
chr1	150464886	150469384	TARS2	.	9	44	14	0.305085	0.256644
chr4	4650703	4651269	STX18-AS1	.	6	2	0	4	0.171096
chr2	10740978	10747437	NOL10	.	11	34	149	0.119565	0.313676
chr1	155385534	155429689	ASH1L	POU5F1P4	3	72	92	0.0363636	0.085548
chr3	171969049	171979873	FNDC3B	.	10	730	6	0.027137	0.28516
chr10	12039670	12056183	UPF2	.	8	73	41	0.13913	0.228128
chr5	53839008	53843428	SNX18	.	5	72	0	0.136986	0.14258
chr8	37734626	37735069	RAB11FIP1	.	6	40	162	0.0591133	0.171096
chr1	172520651	172526934	SUCO	.	10	18	522	0.0369686	0.28516
chr4	1932352	1941505	WHSC1	.	3	1513	188	0.00352526	0.085548
chr8	61484604	61504528	RAB2A	.	8	268	110	0.0422164	0.228128
chr2	203329531	203332412	BMPR2	.	2	4	13	0.222222	0.057032
chr9	138741982	138774924	CAMSAP1	.	7	13	22	0.388889	0.199612
chr1	184701970	184706845	EDEM3	.	5	2206	19	0.00449236	0.14258
chr8	37727937	37735069	RAB11FIP1	.	4	17	162	0.0444444	0.114064
chr8	52744003	52773806	PCMTD1	.	10	112	108	0.0904977	0.28516
chr3	169854206	169867032	PHC3	.	5	65	53	0.0840336	0.14258
chr1	243579003	243589860	SDCCAG8	.	5	35	3	0.25641	0.14258
chr4	39739039	39757359	UBE2K	.	7	147	37	0.0756757	0.199612
chr6	17624791	17649531	NUP153	.	13	16	145	0.160494	0.370708
chr14	80944596	80997230	CEP128	.	7	7	76	0.166667	0.199612
chr13	33109905	33111164	N4BP2L2	.	2	17	361	0.0105541	0.057032
chr7	22330793	22357656	RAPGEF5	.	2	8	5	0.285714	0.057032
chr14	81329100	81372425	CEP128	.	4	285	96	0.0209424	0.114064
chr2	173423435	173429801	PDK1	.	5	82	300	0.0261097	0.14258
chr3	136183722	136221621	STAG1	.	11	127	82	0.104762	0.313676
chr3	63898263	63898901	ATXN7	.	3	4	0	1.2	0.085548
chr14	92592465	92609638	CPSF2	.	8	4	168	0.0924855	0.228128
chr7	155457868	155473602	RBM33	.	6	35	59	0.126316	0.171096
chr3	169831147	169840532	PHC3	.	3	49	18	0.0882353	0.085548
chr8	42828431	42841938	HOOK3	.	6	474	336	0.0147965	0.171096
chr3	98502406	98512636	ST3GAL6	.	6	111	9	0.0991736	0.171096
chr20	30904020	30904677	KIF3B	.	3	138	149	0.0208333	0.085548
chr20	43600718	43625947	STK4	.	0	0	0	0	0
chr3	101389973	101391057	ZBTB11	.	8	8	52	0.262295	0.228128
chr1	147805338	147808043	NBPF8	.	7	0	6	2	0.199612
chr8	135612678	135622898	ZFAT	ZFAT-AS1	0	0	0	0	0
chr8	103850971	103855975	AZIN1	.	3	639	363	0.00598205	0.085548
chr3	128514202	128526514	RAB7A	.	8	7	34	0.380952	0.228128
chr18	59888269	59899660	KIAA1468	.	8	54	27	0.195122	0.228128
chr7	77378740	77394949	RSBN1L	.	11	48	21	0.314286	0.313676
chr1	21097422	21100103	HP1BP3	.	0	0	0	0	0
chr10	15863654	15885271	FAM188A	.	12	18	104	0.195122	0.342192
chr3	169694733	169706147	SEC62	.	7	389	219	0.0229885	0.199612
chr15	65471271	65472542	CLPX	.	2	28	81	0.0363636	0.057032
chr9	35236465	35243361	UNC13B	.	4	101	26	0.0625	0.114064
chr1	33413822	33415375	RNF19B	.	0	0	0	0	0
chr6	139264649	139265759	REPS1	.	0	0	0	0	0
chr2	99786012	99787892	MITD1	.	0	0	0	0	0
chrX	130498722	130503026	.	.	9	0	0	18	0.256644
chr2	197777605	197787849	PGAP1	.	6	2	0	4	0.171096
chr1	162535801	162560301	UAP1	.	10	2541	633	0.00629921	0.28516
chr6	116966876	116980087	ZUFSP	.	5	8	62	0.140845	0.14258
chr14	56078736	56086030	KTN1	.	4	68	272	0.0234604	0.114064
chr16	81385187	81411307	GAN	.	0	0	0	0	0
chr16	85667519	85667738	GSE1	.	0	0	0	0	0
chr8	28866588	28876430	HMBOX1	.	3	42	99	0.0422535	0.085548
chr11	85707868	85714494	PICALM	.	0	0	0	0	0
chr10	104117795	104119192	GBF1	.	3	85	27	0.0530973	0.085548
chr11	92085261	92088570	FAT3	.	9	10	4	1.2	0.256644
chr10	31661946	31750166	ZEB1	.	2	6	39	0.0869565	0.057032
chr8	42761315	42829337	HOOK3	.	5	99	70	0.0588235	0.14258
chr2	173429230	173460751	PDK1	.	0	0	0	0	0
chr15	91519905	91525211	PRC1	PRC1-AS1	3	384	238	0.00963082	0.085548
chr4	2659529	2674099	FAM193A	.	7	17	22	0.35	0.199612
chr16	17352844	17353355	XYLT1	.	3	19	24	0.136364	0.085548
chr3	27958264	27972446	.	.	0	0	0	0	0
chr13	33306237	33309467	PDS5B	.	0	0	0	0	0
chr4	2951660	2955372	NOP14	NOP14-AS1	3	268	120	0.0154242	0.085548
chr20	34241449	34246936	CPNE1	.	2	1	37	0.102564	0.057032
chr20	49558567	49571822	DPM1	ADNP-AS1	3	825	1009	0.00326975	0.085548
chr11	94178975	94180604	MRE11A	.	3	62	32	0.0631579	0.085548
chr1	168007608	168014465	DCAF6	.	10	328	572	0.0221976	0.28516
chr2	64083439	64085070	UGP2	.	2	84	14	0.040404	0.057032
chr9	33948371	33956144	UBAP2	.	0	0	0	0	0
chr4	3088665	3109150	HTT	.	3	0	11	0.5	0.085548
chr9	33986757	34017187	UBAP2	.	7	7	14	0.636364	0.199612
chr14	73614502	73640415	PSEN1	.	0	0	0	0	0
chr6	76412360	76412788	SENP6	.	3	21	112	0.0447761	0.085548
chr4	88116475	88116842	KLHL8	.	0	0	0	0	0
chr10	3160973	3162236	PFKP	.	0	0	0	0	0
chr11	18312988	18314523	HPS5	.	3	17	31	0.122449	0.085548
chr14	73181130	73198642	DPF3	.	3	61	72	0.0447761	0.085548
chr7	100410368	100410830	EPHB4	.	0	0	0	0	0
chr3	188844845	188850486	.	.	4	3	3	1.14286	0.114064
chr12	112116954	112121111	BRAP	.	0	0	0	0	0
chrX	16846216	16847893	TXLNG	.	4	133	110	0.0327869	0.114064
chr3	169854206	169896726	PHC3	.	3	65	7	0.0821918	0.085548
chr1	176050287	176105683	RFWD2	.	3	20	38	0.101695	0.085548
chr8	67986477	67988816	CSPP1	.	2	42	278	0.0124611	0.057032
chr6	7884591	7889081	BLOC1S5-TXNDC5	.	4	8510	8509	0.000470035	0.114064
chr5	74109664	74137504	FAM169A	.	7	13	7	0.666667	0.199612
chr15	66044716	66053776	DENND4A	.	0	0	0	0	0
chr5	122868262	122893258	CSNK1G3	.	5	0	76	0.12987	0.14258
chr5	133534776	133541822	PPP2CA	.	2	195	113	0.012945	0.057032
chr19	18258252	18258434	MAST3	.	0	0	0	0	0
chr4	25128885	25160729	SEPSECS	.	0	0	0	0	0
chr5	147468916	147473305	.	SPINK5	4	0	5	1.33333	0.114064
chr8	17829837	17830196	PCM1	.	0	0	0	0	0
chr7	65592690	65599361	CRCP	.	2	4	27	0.125	0.057032
chr2	44428324	44436466	PPM1B	.	6	19	73	0.129032	0.171096
chr1	91382196	91447927	ZNF644	.	6	0	22	0.521739	0.171096
chr18	76953182	76974038	ATP9B	.	0	0	0	0	0
chr1	145646114	145663367	NBPF20	.	6	21	52	0.162162	0.171096
chr10	102683734	102685776	SLF2	.	6	16	65	0.146341	0.171096
chr2	128747137	128754065	SAP130	.	0	0	0	0	0
chr22	24698162	24743144	SPECC1L	.	0	0	0	0	0
chr3	129546645	129551669	TMCC1	.	3	14	11	0.230769	0.085548
chr7	33397466	33427756	BBS9	.	0	0	0	0	0
chr5	96349351	96364316	LNPEP	.	3	77	2	0.075	0.085548
chr14	81297486	81304622	CEP128	.	2	160	177	0.0118343	0.057032
chr11	118940943	118944661	VPS11	.	2	25	29	0.0727273	0.057032
chr11	108199747	108202764	ATM	.	6	135	124	0.0461538	0.171096
chr14	21825355	21829372	SUPT16H	.	0	0	0	0	0
chr20	2944917	2945848	VPS16	.	2	6	19	0.153846	0.057032
chr1	78097534	78107340	ZZZ3	.	7	17	72	0.155556	0.199612
chr3	61603333	61609229	PTPRG	.	0	0	0	0	0
chr3	33441680	33467233	UBP1	.	0	0	0	0	0
chr20	30380537	30382351	TPX2	.	0	0	0	0	0
chr1	78177431	78181553	USP33	.	2	113	75	0.021164	0.057032
chr10	90661412	90682193	STAMBPL1	.	6	10	5	0.75	0.171096
chr1	145594038	145595220	POLR3C	NBPF20	0	0	0	0	0
chr8	618597	624047	ERICH1	.	4	14	314	0.0243161	0.114064
chr18	8714136	8720494	.	.	6	0	22	0.521739	0.171096
chr16	18852886	18856973	SMG1	.	7	21	58	0.175	0.199612
chr15	59204761	59205895	SLTM	.	2	7	155	0.0245399	0.057032
chr10	1118055	1126416	WDR37	.	0	0	0	0	0
chr11	120339996	120348235	ARHGEF12	.	0	0	0	0	0
chr16	30740286	30740893	SRCAP	.	0	0	0	0	0
chr16	11114049	11154879	CLEC16A	.	2	8	4	0.307692	0.057032
chr9	81035195	81038128	.	.	2	0	0	4	0.057032
chr5	173371969	173380275	CPEB4	.	0	0	0	0	0
chr5	134696186	134705832	H2AFY	.	4	76	141	0.0366972	0.114064
chr2	27822449	27824309	ZNF512	.	0	0	0	0	0
chr18	20569183	20581692	RBBP8	.	0	0	0	0	0
chr16	85023909	85029613	ZDHHC7	.	0	0	0	0	0
chr17	59853761	59857762	BRIP1	.	0	0	0	0	0
chr2	69590676	69601245	GFPT1	.	0	0	0	0	0
chr15	41648236	41668026	NUSAP1	.	0	0	0	0	0
chr8	67513932	67514758	MYBL1	.	0	0	0	0	0
chr4	56319220	56322467	CLOCK	.	0	0	0	0	0
chr4	54280781	54310270	FIP1L1	.	0	0	0	0	0
chr3	23710890	23711550	.	.	5	2	1	2.5	0.14258
chr21	33073307	33078670	SCAF4	.	0	0	0	0	0
chr11	112064196	112072913	BCO2	.	0	0	0	0	0
chr7	77407654	77410091	RSBN1L	.	0	0	0	0	0
chr3	100013930	100016889	TBC1D23	.	0	0	0	0	0
chr12	112743867	112757546	HECTD4	.	3	23	14	0.157895	0.085548
chr1	171492359	171502100	PRRC2C	.	0	0	0	0	0
chr11	34107610	34107960	CAPRIN1	.	0	0	0	0	0
chr10	99196947	99197507	EXOSC1	.	0	0	0	0	0
chr3	61607643	61609229	PTPRG	.	0	0	0	0	0
chrX	48433555	48435497	RBM3	.	0	0	0	0	0
chr3	186509513	186522513	RFC4	.	2	92	132	0.0177778	0.057032
chr1	22073559	22084276	USP48	.	4	118	38	0.0509554	0.114064
chr10	15863654	15889942	FAM188A	.	3	18	18	0.162162	0.085548
chr3	47098310	47108608	SETD2	.	0	0	0	0	0
chr2	173429230	173429801	PDK1	.	0	0	0	0	0
chr20	42602006	42635432	TOX2	.	0	0	0	0	0
chr14	69583082	69589077	DCAF5	.	0	0	0	0	0
chr1	160293220	160302347	COPA	.	4	19	195	0.0372093	0.114064
chr9	131254704	131255084	SLC27A4	.	0	0	0	0	0
chr8	124089350	124132428	TBC1D31	.	0	0	0	0	0
chr11	86778735	86782657	TMEM135	.	2	256	34	0.0137457	0.057032
chr2	15691616	15698758	NBAS	.	0	0	0	0	0
chr2	62227835	62228117	COMMD1	.	2	114	127	0.0165289	0.057032
chr6	109215669	109286343	ARMC2	ARMC2-AS1	0	0	0	0	0
chr6	108233919	108246136	SEC63	.	3	5	37	0.139535	0.085548
chr3	169863210	169896726	PHC3	.	0	0	0	0	0
chr13	77779390	77818086	MYCBP2	.	0	0	0	0	0
chr1	51005263	51061888	FAF1	.	0	0	0	0	0
chr2	44200745	44209573	LRPPRC	.	0	0	0	0	0
chr16	53907697	53922863	FTO	.	0	0	0	0	0
chr15	65756098	65772737	DPP8	.	0	0	0	0	0
chr15	52876941	52885933	FAM214A	.	0	0	0	0	0
chr1	156127860	156128615	SEMA4A	.	0	0	0	0	0
chr1	155348071	155385714	ASH1L	.	0	0	0	0	0
chr4	48371865	48396670	SLAIN2	.	0	0	0	0	0
chr7	115889073	115892530	TES	.	2	251	145	0.0100756	0.057032
chr3	142242834	142279296	ATR	.	0	0	0	0	0
chr2	97399255	97400263	LMAN2L	.	0	0	0	0	0
chr22	50810448	50845304	PPP6R2	.	0	0	0	0	0
chr18	9182379	9208801	ANKRD12	.	0	0	0	0	0
chr18	42362429	42364010	SETBP1	.	4	4	0	1.6	0.114064
chr16	30507417	30507887	ITGAL	.	0	0	0	0	0
chr6	90454991	90460251	MDN1	.	0	0	0	0	0
chr6	90045020	90053475	UBE2J1	.	3	268	632	0.00665927	0.085548
chr3	172080422	172098883	FNDC3B	.	0	0	0	0	0
chr16	69189773	69201088	UTP4	.	0	0	0	0	0
chr12	105385489	105389804	C12orf45	.	0	0	0	0	0
chr11	108172374	108181042	ATM	.	0	0	0	0	0
chr10	126631025	126655350	ZRANB1	.	2	26	54	0.0493827	0.057032
chr1	185183638	185200840	SWT1	.	0	0	0	0	0
chr5	74041502	74046492	GFM2	.	0	0	0	0	0
chr8	38693679	38696064	TACC1	.	0	0	0	0	0
chr8	16955670	16977910	MICU3	.	0	0	0	0	0
chr5	77385216	77425131	AP3B1	.	0	0	0	0	0
chr21	46591524	46596579	ADARB1	.	0	0	0	0	0
chr21	40596333	40610499	BRWD1	.	2	2	38	0.097561	0.057032
chr2	10784445	10808849	NOL10	.	0	0	0	0	0
chr17	64509453	64510584	PRKCA	.	0	0	0	0	0
chr15	44846750	44855423	EIF3J	SPG11	0	0	0	0	0
chr15	101775286	101775782	CHSY1	.	0	0	0	0	0
chr14	81223235	81304622	CEP128	.	0	0	0	0	0
chr11	62491058	62491898	BSCL2	.	0	0	0	0	0
chr1	114372213	114377061	PTPN22	AP4B1-AS1	0	0	0	0	0
chr10	90653627	90665417	STAMBPL1	.	0	0	0	0	0
chr10	5827814	5842668	GDI2	.	2	151	775	0.00431499	0.057032
chr8	95390407	95423543	RAD54B	.	0	0	0	0	0
chr8	22355513	22370945	PPP3CC	.	0	0	0	0	0
chr7	66273872	66275834	RABGEF1	GTF2IRD1P1	0	0	0	0	0
chr7	131193709	131196192	PODXL	.	0	0	0	0	0
chr6	82923943	82933337	IBTK	.	0	0	0	0	0
chr5	95091099	95099324	RHOBTB3	.	0	0	0	0	0
chr3	51474985	51477919	VPRBP	.	0	0	0	0	0
chr20	50048603	50052298	NFATC2	.	0	0	0	0	0
chr20	23370582	23383709	NAPB	.	3	4	3	0.75	0.085548
chr17	27248705	27251320	PHF12	.	0	0	0	0	0
chr13	77785301	77818086	MYCBP2	.	0	0	0	0	0
chr1	224592131	224612356	WDR26	.	0	0	0	0	0
chr1	156294762	156304709	CCT3	.	0	0	0	0	0
chr11	34969052	34991833	PDHX	.	3	85	46	0.0454545	0.085548
chr10	93711159	93713630	BTAF1	.	0	0	0	0	0
chr10	128768965	128798571	DOCK1	.	3	16	7	0.25	0.085548
chr10	103557736	103567658	MGEA5	.	0	0	0	0	0
chr3	18419661	18462483	SATB1	.	0	0	0	0	0
chr13	20304378	20356931	PSPC1	.	0	0	0	0	0
chr9	3395471	3420870	RFX3	.	0	0	0	0	0
chr8	67504674	67514758	MYBL1	.	0	0	0	0	0
chr7	91700218	91715000	AKAP9	.	0	0	0	0	0
chr6	109215669	109258202	ARMC2	ARMC2-AS1	0	0	0	0	0
chr5	54635837	54675023	SKIV2L2	.	0	0	0	0	0
chr5	32121600	32143986	GOLPH3	.	0	0	0	0	0
chr4	108565957	108581228	PAPSS1	.	0	0	0	0	0
chr3	56657671	56707753	FAM208A	.	0	0	0	0	0
chr3	141272698	141278837	RASA2	.	2	15	18	0.117647	0.057032
chr2	9675962	9676957	ADAM17	.	0	0	0	0	0
chr22	41277773	41278181	XPNPEP3	.	0	0	0	0	0
chr2	190728468	190728954	PMS1	.	2	125	54	0.0222222	0.057032
chr20	60699672	60706562	LSM14B	.	0	0	0	0	0
chr19	8520288	8532468	HNRNPM	.	0	0	0	0	0
chr19	18648410	18649243	FKBP8	.	0	0	0	0	0
chr17	4109615	4113242	ANKFY1	.	0	0	0	0	0
chr17	27778472	27794234	TAOK1	.	0	0	0	0	0
chr17	13768395	13796156	.	.	0	0	0	0	0
chr16	89371613	89383486	ANKRD11	.	0	0	0	0	0
chr15	72300166	72338975	MYO9A	.	0	0	0	0	0
chr1	52289335	52306186	NRDC	.	0	0	0	0	0
chr14	35560275	35579835	PPP2R3C	FAM177A1	0	0	0	0	0
chr1	40654726	40661436	RLF	.	0	0	0	0	0
chr11	75672487	75694557	UVRAG	.	0	0	0	0	0
chrX	53588716	53589205	HUWE1	.	0	0	0	0	0
chr8	48752576	48766775	PRKDC	.	0	0	0	0	0
chr7	158423188	158439255	NCAPG2	.	0	0	0	0	0
chr7	101950003	101952188	SH2B2	.	0	0	0	0	0
chr6	82923943	82930430	IBTK	.	0	0	0	0	0
chr6	76344422	76412788	SENP6	.	0	0	0	0	0
chr6	74183087	74189849	MTO1	.	0	0	0	0	0
chr5	74696029	74706928	COL4A3BP	.	0	0	0	0	0
chr5	179135239	179136060	CANX	.	0	0	0	0	0
chr5	172507587	172550205	CREBRF	.	0	0	0	0	0
chr4	170428187	170459062	NEK1	.	0	0	0	0	0
chr3	192444969	192463145	.	.	0	0	0	0	0
chr3	169866873	169896726	PHC3	.	0	0	0	0	0
chr3	167437849	167443261	PDCD10	.	0	0	0	0	0
chr2	203139835	203169329	NOP58	.	0	0	0	0	0
chr2	17942662	17946340	GEN1	.	0	0	0	0	0
chr19	6890491	6916379	ADGRE1	.	0	0	0	0	0
chr1	93070863	93091491	EVI5	.	0	0	0	0	0
chr19	1880363	1922898	.	ABHD17A	0	0	0	0	0
chr18	34534393	34539398	KIAA1328	.	0	0	0	0	0
chr17	3955264	3961449	ZZEF1	.	0	0	0	0	0
chr17	19843025	19866335	AKAP10	.	0	0	0	0	0
chr17	15974722	15979016	NCOR1	.	0	0	0	0	0
chr1	46105881	46120991	GPBP1L1	.	0	0	0	0	0
chr1	243468014	243493994	SDCCAG8	.	0	0	0	0	0
chr12	31600471	31633189	DENND5B	.	0	0	0	0	0
chr12	26864105	26943160	ITPR2	.	0	0	0	0	0
chr1	21306826	21329301	EIF4G3	.	0	0	0	0	0
chr1	21167348	21191755	EIF4G3	.	0	0	0	0	0
chr11	65267236	65267597	.	MALAT1	0	0	0	0	0
chr1	151150476	151156969	VPS72	.	0	0	0	0	0
chr11	122646926	122647918	UBASH3B	.	0	0	0	0	0
chr10	76910271	76910864	SAMD8	.	0	0	0	0	0
chr10	35805450	35819171	CCNY	.	0	0	0	0	0
chr2	208841374	208842310	PLEKHM3	.	6	1	2	3	0.171096
chr10	34558584	34573173	PARD3	.	18	38	56	0.378947	0.513288
chr8	98673299	98703416	MTDH	.	7	1549	995	0.00550098	0.199612
chr11	85733409	85742653	PICALM	.	10	140	31	0.116279	0.28516
chr3	61608136	61609229	PTPRG	.	13	7	8	1.625	0.370708
chr9	86292641	86293514	UBQLN1	.	9	59	636	0.0258621	0.256644
chr6	155095122	155116273	SCAF8	.	12	70	25	0.25	0.342192
chr2	82024941	82025642	.	.	20	12	0	3.07692	0.57032
chr4	77055327	77065626	NUP54	.	12	23	53	0.311688	0.342192
chr13	51501542	51523641	RNASEH2B	.	0	0	0	0	0
chr10	70227879	70229920	DNA2	.	3	11	27	0.153846	0.085548
chr1	29481207	29481422	SRSF4	.	0	0	0	0	0
chr4	156617907	156643344	GUCY1A3	.	5	141	29	0.0584795	0.14258
chr1	162535801	162536138	UAP1	.	4	2541	2116	0.00171748	0.114064
chr6	161469647	161471011	MAP3K4	.	8	65	13	0.202532	0.228128
chr16	11940357	11941663	RSL1D1	.	11	856	112	0.0227038	0.313676
chr2	177161587	177202305	MTX2	.	7	6	0	2	0.199612
chr3	3178943	3186394	TRNT1	.	6	31	1	0.363636	0.171096
chr22	32874967	32875262	FBXO7	.	11	65	109	0.125714	0.313676
chr4	83799882	83803093	SEC31A	.	0	0	0	0	0
chr22	42204878	42206295	CCDC134	.	5	3	11	0.666667	0.14258
chr2	86088303	86097381	ST3GAL5	.	5	12	6	0.526316	0.14258
chr7	39243833	39247219	POU6F2	.	6	7	6	0.857143	0.171096
chr16	11815432	11830089	TXNDC11	.	8	158	21	0.0888889	0.228128
chr3	33725850	33738425	CLASP2	.	9	19	61	0.222222	0.256644
chr1	115262199	115263338	CSDE1	.	3	110	2264	0.00252632	0.085548
chr1	51001040	51061888	FAF1	.	10	323	90	0.0483092	0.28516
chrX	154736558	154766779	TMLHE	.	3	7	0	0.75	0.085548
chr10	76153898	76158337	ADK	.	3	316	9	0.0184049	0.085548
chr2	211018218	211019335	KANSL1L	.	0	0	0	0	0
chr2	72692288	72707879	EXOC6B	.	4	0	22	0.347826	0.114064
chr7	40027197	40041630	CDK13	.	3	5	2	0.75	0.085548
chr11	93429485	93433352	CEP295	.	5	45	41	0.114943	0.14258
chr1	162546566	162570693	UAP1	.	3	2118	18	0.00280767	0.085548
chr17	5364258	5365866	DHX33	.	2	3	4	0.5	0.057032
chr14	81209418	81297638	CEP128	.	8	23	366	0.0410256	0.228128
chr8	119251953	119253509	SAMD12	.	4	0	6	1.14286	0.114064
chr9	88233897	88248289	AGTPBP1	.	3	34	48	0.0722892	0.085548
chr16	88694029	88695262	ZC3H18	.	3	7	12	0.3	0.085548
chr16	22236974	22237296	EEF2K	.	3	4	32	0.162162	0.085548
chr6	109220896	109233761	ARMC2	ARMC2-AS1	2	676	94	0.00518807	0.057032
chr1	169947225	170001116	KIFAP3	.	2	31	0	0.125	0.057032
chr1	51868106	51874004	EPS15	.	2	6	85	0.0434783	0.057032
chr10	31661946	31676727	ZEB1	.	2	6	5	0.333333	0.057032
chr17	73238416	73239651	GGA3	.	3	39	28	0.0882353	0.085548
chr7	30661008	30662078	GARS	.	6	72	434	0.0236686	0.171096
chr1	187223507	187298192	LINC01036	.	13	1	24	1	0.370708
chr14	81380665	81382906	CEP128	.	8	71	93	0.0969697	0.228128
chr2	20478343	20527139	PUM2	.	5	6	78	0.117647	0.14258
chr21	34614190	34625135	IFNAR2	.	0	0	0	0	0
chr1	151611363	151611595	SNX27	.	0	0	0	0	0
chr7	4780468	4780654	FOXK1	.	6	14	13	0.428571	0.171096
chr2	99811213	99812219	MRPL30	.	15	50	9	0.5	0.42774
chr1	114377531	114397671	PTPN22	AP4B1-AS1	0	0	0	0	0
chr8	100108539	100205285	VPS13B	.	0	0	0	0	0
chr4	1918597	1936989	WHSC1	.	11	2266	1365	0.00605727	0.313676
chr13	95953494	96003967	.	.	3	18	0	0.315789	0.085548
chr5	100222046	100231489	ST8SIA4	.	4	291	239	0.0150659	0.114064
chr11	120446377	120447998	GRIK4	.	3	3	2	1	0.085548
chr22	46125304	46136418	ATXN10	.	0	0	0	0	0
chr16	22360599	22361170	CDR2	.	3	56	69	0.047619	0.085548
chr2	85595808	85598685	ELMOD3	.	5	0	2	3.33333	0.14258
chr7	24663281	24708279	MPP6	.	3	16	100	0.0512821	0.085548
chr10	7409610	7423911	SFMBT2	.	3	12	15	0.214286	0.085548
chr7	148851036	148851432	ZNF398	.	6	25	11	0.324324	0.171096
chr1	58992932	59004982	OMA1	.	6	48	24	0.164384	0.171096
chr7	22999874	23030758	FAM126A	.	2	100	35	0.0294118	0.057032
chr6	107824860	107827631	SOBP	.	3	0	4	1.2	0.085548
chr4	88091230	88116842	KLHL8	.	0	0	0	0	0
chr10	5838725	5842668	GDI2	.	4	87	775	0.00926999	0.114064
chr9	140646782	140652463	EHMT1	.	3	26	17	0.136364	0.085548
chr2	201721404	201726585	CLK1	.	0	0	0	0	0
chr10	1125950	1126416	WDR37	.	2	66	4	0.056338	0.057032
chr4	88084709	88116842	KLHL8	.	4	2	17	0.4	0.114064
chr22	46085591	46114373	ATXN10	.	10	3	77	0.246914	0.28516
chr1	24840803	24841057	RCAN3	.	0	0	0	0	0
chr16	70292882	70296427	AARS	.	4	45	250	0.027027	0.114064
chr14	35331249	35331528	BAZ1A	.	4	13	37	0.156863	0.114064
chr8	98698895	98718978	MTDH	.	0	0	0	0	0
chr4	52729602	52744020	DCUN1D4	.	0	0	0	0	0
chr11	13435076	13466728	BTBD10	.	9	19	25	0.4	0.256644
chr2	168869143	168873605	STK39	.	0	0	0	0	0
chr5	172359438	172362313	ERGIC1	.	4	102	41	0.0555556	0.114064
chr5	139819703	139828890	ANKHD1	.	0	0	0	0	0
chr2	61749745	61753656	XPO1	.	0	0	0	0	0
chr21	45106684	45108121	RRP1B	.	4	1	21	0.347826	0.114064
chr12	112096539	112098479	BRAP	.	0	0	0	0	0
chr2	61118817	61128218	REL	.	4	69	6	0.105263	0.114064
chr7	23400204	23401360	IGF2BP3	.	6	0	2	4	0.171096
chr2	182346324	182350719	ITGA4	.	2	864	165	0.0038835	0.057032
chr3	71090478	71102924	FOXP1	.	3	4	11	0.375	0.085548
chr2	204244930	204267457	ABI2	.	3	56	11	0.0882353	0.085548
chr1	28362054	28374937	EYA3	.	4	121	61	0.0437158	0.114064
chr10	126370175	126370948	FAM53B	.	0	0	0	0	0
chr17	27248705	27254081	PHF12	LOC101927018	0	0	0	0	0
chrX	135304551	135326954	MAP7D3	.	3	376	399	0.00773196	0.085548
chr7	30590251	30601744	LOC401320	.	3	8	4	0.461538	0.085548
chr3	197541778	197547301	LRCH3	.	9	8	33	0.428571	0.256644
chr22	38917612	38964294	DMC1	.	0	0	0	0	0
chr1	173961892	173962273	RC3H1	.	0	0	0	0	0
chr7	104714065	104719410	KMT2E	.	0	0	0	0	0
chr8	68018139	68028357	CSPP1	.	4	24	28	0.150943	0.114064
chr8	29927157	29927575	MIR548O2	.	4	387	1082	0.00544218	0.114064
chr9	125932180	125946577	STRBP	.	11	63	74	0.15942	0.313676
chr6	90039501	90053475	UBE2J1	.	0	0	0	0	0
chr3	119219541	119222868	TIMMDC1	.	0	0	0	0	0
chr9	86294689	86301070	UBQLN1	.	0	0	0	0	0
chr4	103644027	103647840	MANBA	.	4	23	25	0.163265	0.114064
chr5	78936673	78964851	PAPD4	.	2	17	71	0.0449438	0.057032
chr14	23395341	23396023	PRMT5	.	2	45	281	0.0122324	0.057032
chr18	42281139	42375009	SETBP1	.	3	10	12	0.26087	0.085548
chr14	103470264	103478525	CDC42BPB	.	0	0	0	0	0
chr5	78915434	78919312	PAPD4	.	3	22	17	0.15	0.085548
chr22	38083916	38084999	NOL12	.	2	72	21	0.0425532	0.057032
chr15	41988272	41989221	MGA	.	11	66	112	0.122905	0.313676
chr12	83250788	83251359	TMTC2	.	5	15	1	0.588235	0.14258
chr1	193202122	193205486	CDC73	.	4	141	8	0.0533333	0.114064
chr11	120916382	120918376	TBCEL	.	0	0	0	0	0
chr10	105371337	105420872	SH3PXD2A	.	5	3	0	2.5	0.14258
chr8	105080739	105161076	RIMS2	.	0	0	0	0	0
chr7	158672374	158684024	WDR60	.	0	0	0	0	0
chr6	74175931	74176329	MTO1	.	2	38	60	0.040404	0.057032
chr4	148867767	148887990	ARHGAP10	.	0	0	0	0	0
chr3	133341934	133343019	TOPBP1	.	4	190	271	0.017316	0.114064
chr17	28808160	28811788	GOSR1	.	4	277	240	0.015444	0.114064
chr12	19615443	19626289	AEBP2	.	4	7	6	0.571429	0.114064
chr3	111985084	111999630	SLC9C1	.	0	0	0	0	0
chr6	90571844	90581107	CASP8AP2	.	0	0	0	0	0
chr19	18648410	18649246	FKBP8	.	0	0	0	0	0
chr2	69553302	69601245	GFPT1	.	0	0	0	0	0
chr14	97008579	97031551	PAPOLA	.	0	0	0	0	0
chr16	74493579	74497377	GLG1	.	5	46	190	0.0421941	0.14258
chr1	15860731	15863309	DNAJC16	.	4	20	4	0.32	0.114064
chr8	90657364	90660841	.	.	11	0	1	11	0.313676
chr6	20781375	20846409	CDKAL1	.	0	0	0	0	0
chr5	100191806	100231489	ST8SIA4	.	4	141	239	0.0209974	0.114064
chr20	47886478	47888287	ZNFX1	.	0	0	0	0	0
chr11	85722072	85742653	PICALM	.	4	9	31	0.195122	0.114064
chr11	74500670	74528759	RNF169	.	4	20	37	0.137931	0.114064
chr1	215749243	215752480	KCTD3	.	0	0	0	0	0
chr7	72883846	72884813	BAZ1B	.	2	70	155	0.0176991	0.057032
chr7	30590251	30614497	LOC401320	.	0	0	0	0	0
chr3	121354581	121356103	HCLS1	.	2	1124	0	0.00355556	0.057032
chr18	12999419	13073184	CEP192	.	0	0	0	0	0
chr13	61013821	61041513	TDRD3	.	0	0	0	0	0
chr5	38991050	39003724	RICTOR	.	3	41	17	0.101695	0.085548
chr5	179134132	179137066	CANX	.	3	1016	1314	0.002574	0.085548
chr20	47707278	47711500	CSE1L	.	0	0	0	0	0
chr18	72589152	72601994	ZNF407	.	0	0	0	0	0
chr18	2666155	2674144	SMCHD1	.	0	0	0	0	0
chr17	80417867	80430574	NARF	.	12	162	11	0.137931	0.342192
chr12	46285562	46287504	ARID2	.	0	0	0	0	0
chr3	114069120	114070725	ZBTB20	ZBTB20-AS1	0	0	0	0	0
chr9	14639893	14680160	ZDHHC21	.	0	0	0	0	0
chr6	7886193	7904956	BLOC1S5-TXNDC5	.	2	498	7034	0.000530997	0.057032
chr6	108222573	108246136	SEC63	.	0	0	0	0	0
chr5	31421378	31424578	DROSHA	.	0	0	0	0	0
chr4	83793096	83796975	SEC31A	.	0	0	0	0	0
chr20	60572605	60574164	TAF4	.	0	0	0	0	0
chrX	53652117	53654466	HUWE1	.	0	0	0	0	0
chr15	90984737	90986710	IQGAP1	.	0	0	0	0	0
chr5	126140467	126147590	LMNB1	.	0	0	0	0	0
chr8	68163533	68172161	ARFGEF1	.	0	0	0	0	0
chr8	10683661	10692285	PINX1	.	0	0	0	0	0
chr19	49642924	49643345	PPFIA3	.	0	0	0	0	0
chr17	65924470	65928135	BPTF	.	0	0	0	0	0
chr16	9014215	9024254	USP7	.	2	71	129	0.0199005	0.057032
chr15	101691924	101719185	.	.	0	0	0	0	0
chr1	150413398	150418877	RPRD2	.	5	43	44	0.113636	0.14258
chr8	17847367	17851128	PCM1	.	0	0	0	0	0
chr3	52446826	52448603	PHF7	.	0	0	0	0	0
chr2	202010100	202014558	CFLAR	CFLAR-AS1	0	0	0	0	0
chr16	70566381	70573110	SF3B3	.	2	299	1134	0.0027894	0.057032
chr6	2397454	2399271	GMDS-AS1	.	2	6	4	0.363636	0.057032
chr4	148800382	148803083	ARHGAP10	.	0	0	0	0	0
chr4	106155053	106158508	TET2	TET2-AS1	0	0	0	0	0
chr18	55280833	55283207	NARS	.	2	576	2127	0.00147929	0.057032
chr18	20570899	20576425	RBBP8	.	0	0	0	0	0
chr14	91755448	91760662	CCDC88C	.	0	0	0	0	0
chr1	48821341	48825442	SPATA6	.	0	0	0	0	0
chr14	35438375	35441270	.	.	0	0	0	0	0
chr10	93711159	93726514	BTAF1	.	3	481	4	0.0123457	0.085548
chr16	70575571	70578436	SF3B3	.	0	0	0	0	0
chr1	184680856	184681732	EDEM3	.	0	0	0	0	0
chr5	58284319	58289292	PDE4D	.	0	0	0	0	0
chr21	46591524	46605006	ADARB1	.	0	0	0	0	0
chr8	42780699	42814457	HOOK3	.	3	416	206	0.00963082	0.085548
chr8	100108539	100168971	VPS13B	.	0	0	0	0	0
chr2	169018296	169038600	STK39	.	0	0	0	0	0
chr1	89206670	89237562	PKN2	.	3	11	10	0.272727	0.085548
chr18	9182379	9211782	ANKRD12	.	6	34	273	0.038961	0.171096
chr14	91763648	91766414	CCDC88C	.	0	0	0	0	0
chr1	41474465	41475261	CTPS1	.	2	144	25	0.0235294	0.057032
chr11	118360506	118363945	KMT2A	.	0	0	0	0	0
chr1	202742245	202746222	KDM5B	.	0	0	0	0	0
chr19	11168930	11170863	SMARCA4	.	0	0	0	0	0
chr16	70566381	70578436	SF3B3	.	0	0	0	0	0
chr2	136505836	136519481	UBXN4	.	0	0	0	0	0
chr8	42805530	42873637	HOOK3	.	0	0	0	0	0
chr17	54926056	54934026	DGKE	.	0	0	0	0	0
chr1	67356836	67371058	WDR78	.	2	4	0	0.8	0.057032
chr15	50875285	50884823	TRPM7	.	6	1	25	0.444444	0.171096
chr12	123798166	123800207	SBNO1	.	0	0	0	0	0
chr12	111951160	111957880	ATXN2	.	3	3	48	0.115385	0.085548
chr1	172520651	172560211	SUCO	.	2	18	0	0.210526	0.057032
chr1	151630710	151641111	SNX27	.	0	0	0	0	0
chr1	150413398	150416853	RPRD2	.	0	0	0	0	0
chr10	103916775	103917971	NOLC1	.	0	0	0	0	0
chr22	21178613	21193019	PI4KA	.	3	19	17	0.162162	0.085548
chr9	86292641	86301070	UBQLN1	.	0	0	0	0	0
chr9	111812562	111826847	TMEM245	.	4	4	77	0.097561	0.114064
chr8	42805530	42841938	HOOK3	.	3	12	336	0.017192	0.085548
chr2	203817281	203826149	CARF	.	0	0	0	0	0
chr2	203155045	203160560	NOP58	.	7	157	357	0.0271845	0.199612
chr2	128922303	128928858	UGGT1	.	0	0	0	0	0
chr17	40174416	40174658	NKIRAS2	.	0	0	0	0	0
chr15	41961025	41991357	MGA	.	0	0	0	0	0
chr10	3201105	3202522	PITRM1	.	0	0	0	0	0
chr4	2986239	3031136	GRK4	.	0	0	0	0	0
chr12	4219087	4219446	.	.	0	0	0	0	0
chr1	153734045	153737539	INTS3	.	0	0	0	0	0
chrX	53641494	53641706	HUWE1	.	0	0	0	0	0
chr8	42761315	42785315	HOOK3	.	0	0	0	0	0
chr6	45479982	45514707	RUNX2	.	0	0	0	0	0
chr5	70805291	70806978	BDP1	.	3	72	19	0.0652174	0.085548
chr4	87685745	87689129	PTPN13	.	2	0	16	0.235294	0.057032
chr3	138400808	138403645	PIK3CB	.	0	0	0	0	0
chr18	42449194	42533305	SETBP1	.	0	0	0	0	0
chr14	50262508	50267414	NEMF	.	0	0	0	0	0
chr11	78176921	78204241	NARS2	.	0	0	0	0	0
chr1	171548492	171556890	PRRC2C	.	4	77	270	0.0229885	0.114064
chr8	98817580	98837381	LAPTM4B	.	0	0	0	0	0
chr6	76331247	76357517	SENP6	.	4	63	37	0.0792079	0.114064
chr4	77916933	77952123	2011-09-01	.	2	0	14	0.266667	0.057032
chr3	50150815	50151684	RBM5	.	4	130	217	0.0229885	0.114064
chr22	42204878	42206004	CCDC134	.	0	0	0	0	0
chr17	57842331	57851246	VMP1	.	0	0	0	0	0
chr17	49067810	49075978	SPAG9	.	0	0	0	0	0
chr17	26490568	26499644	NLK	.	0	0	0	0	0
chr14	81209418	81307112	CEP128	.	0	0	0	0	0
chr13	52971366	52976816	THSD1	.	0	0	0	0	0
chr1	184671944	184677478	EDEM3	.	2	75	306	0.0104712	0.057032
chr11	120447096	120447998	GRIK4	.	3	0	2	2	0.085548
chr10	111883774	111890244	ADD3	.	0	0	0	0	0
chr3	155547476	155551830	SLC33A1	.	0	0	0	0	0
chr3	169840378	169843795	PHC3	.	0	0	0	0	0
chr3	185155234	185161424	MAP3K13	.	0	0	0	0	0
chr14	75576387	75577074	NEK9	.	0	0	0	0	0
chr14	39627488	39628754	TRAPPC6B	.	0	0	0	0	0
chr8	30938382	30958471	WRN	.	0	0	0	0	0
chr7	105121498	105135700	PUS7	.	0	0	0	0	0
chr6	71242862	71248104	FAM135A	.	0	0	0	0	0
chr6	62687970	62757899	KHDRBS2	.	0	0	0	0	0
chr6	170626457	170632347	FAM120B	.	0	0	0	0	0
chr5	64863339	64868113	PPWD1	.	0	0	0	0	0
chr22	38894089	38897285	DDX17	.	0	0	0	0	0
chr22	38620791	38627340	TMEM184B	.	0	0	0	0	0
chr2	171862656	171863573	TLK1	.	0	0	0	0	0
chr2	136688051	136691560	DARS	.	0	0	0	0	0
chr19	8520288	8536311	HNRNPM	.	0	0	0	0	0
chr18	9204473	9239554	ANKRD12	.	6	105	0	0.113208	0.171096
chr17	35578644	35583373	ACACA	.	0	0	0	0	0
chr16	11096930	11118778	CLEC16A	.	0	0	0	0	0
chr13	41133645	41134997	FOXO1	.	0	0	0	0	0
chr1	243456392	243471479	SDCCAG8	.	0	0	0	0	0
chr1	223991875	223994649	TP53BP2	.	2	49	12	0.0645161	0.057032
chr1	171492359	171494104	PRRC2C	.	0	0	0	0	0
chr11	128963515	129034322	ARHGAP32	.	0	0	0	0	0
chr6	18212718	18214012	KDM1B	.	0	0	0	0	0
chr10	518378	532470	DIP2C	.	0	0	0	0	0
chr7	98564663	98569568	TRRAP	.	3	21	46	0.0882353	0.085548
chr6	155108994	155154543	SCAF8	.	0	0	0	0	0
chr5	75737217	75758139	IQGAP2	.	0	0	0	0	0
chr19	12635609	12639510	ZNF564	.	0	0	0	0	0
chr16	11114049	11118778	CLEC16A	.	0	0	0	0	0
chr9	86274694	86284242	UBQLN1	.	0	0	0	0	0
chr8	640897	642612	ERICH1	.	0	0	0	0	0
chr7	155493466	155499762	RBM33	.	3	56	12	0.0869565	0.085548
chr5	43675612	43704444	NNT	.	2	94	0	0.0421053	0.057032
chr3	65415194	65428524	MAGI1	.	0	0	0	0	0
chr3	47651555	47680270	SMARCC1	.	0	0	0	0	0
chr3	182788786	182789145	MCCC1	.	0	0	0	0	0
chr2	201994451	202014558	CFLAR	CFLAR-AS1	0	0	0	0	0
chr17	58538023	58539422	APPBP2	.	0	0	0	0	0
chr17	45405634	45422464	EFCAB13	.	3	1	0	3	0.085548
chr1	47745912	47748131	STIL	.	0	0	0	0	0
chr12	117365827	117387511	FBXW8	.	0	0	0	0	0
chr5	134010304	134011815	SEC24A	.	0	0	0	0	0
chr14	90446883	90451554	TDP1	.	0	0	0	0	0
chr12	29492783	29494749	ERGIC2	.	0	0	0	0	0
chr1	114964057	115007010	TRIM33	.	0	0	0	0	0
chrX	130883333	130918067	FIRRE	.	0	0	0	0	0
chr9	88247576	88261333	AGTPBP1	.	0	0	0	0	0
chr9	123280704	123301442	CDK5RAP2	.	0	0	0	0	0
chr8	16955966	16991770	MICU3	.	2	3	3	0.571429	0.057032
chr7	65705311	65706257	TPST1	.	2	0	11	0.333333	0.057032
chr6	149663820	149700654	TAB2	.	0	0	0	0	0
chr5	76745584	76760634	WDR41	.	0	0	0	0	0
chr3	69077050	69077446	TMF1	.	0	0	0	0	0
chr3	57618991	57627474	DENND6A	.	0	0	0	0	0
chr18	13681603	13682104	FAM210A	.	0	0	0	0	0
chr15	91030185	91035943	IQGAP1	.	0	0	0	0	0
chr14	81297486	81297638	CEP128	.	0	0	0	0	0
chr1	36213507	36214205	CLSPN	.	0	0	0	0	0
chr12	1213915	1225199	ERC1	.	0	0	0	0	0
chr1	197611840	197627499	DENND1B	.	0	0	0	0	0
chr10	89268092	89280926	MINPP1	.	0	0	0	0	0
chr3	188925164	188956698	TPRG1	TPRG1-AS2	0	0	0	0	0
chr9	33953282	33996331	UBAP2	.	0	0	0	0	0
chr8	42716887	42729149	RNF170	.	0	0	0	0	0
chr8	22332466	22355625	PPP3CC	.	0	0	0	0	0
chr6	90461149	90463341	MDN1	.	0	0	0	0	0
chr4	148944413	148968202	ARHGAP10	.	0	0	0	0	0
chr3	132389041	132391021	UBA5	ACAD11	0	0	0	0	0
chr2	68717321	68772444	APLF	.	0	0	0	0	0
chr2	165969394	165970480	SCN3A	.	0	0	0	0	0
chr2	106739425	106782539	UXS1	.	3	1	10	0.5	0.085548
chr20	33065576	33069011	ITCH	.	0	0	0	0	0
chr19	19756682	19757156	ATP13A1	.	0	0	0	0	0
chr15	65790201	65793117	DPP8	.	0	0	0	0	0
chr14	71443658	71462642	PCNX1	.	0	0	0	0	0
chr1	185143503	185144245	SWT1	.	0	0	0	0	0
chr11	68334481	68363686	PPP6R3	.	0	0	0	0	0
chr1	162567581	162571304	UAP1	.	0	0	0	0	0
chr1	15862969	15863309	DNAJC16	.	0	0	0	0	0
chr5	153409048	153414527	FAM114A2	.	0	0	0	0	0
chr2	88874183	88895181	EIF2AK3	LOC101928371	0	0	0	0	0
chrX	53432176	53432323	SMC1A	.	0	0	0	0	0
chrX	10031484	10035530	WWC3	.	0	0	0	0	0
chr9	6420911	6421142	UHRF2	.	2	8	71	0.05	0.057032
chr9	19286766	19305525	DENND4C	.	0	0	0	0	0
chr8	61496766	61504528	RAB2A	.	0	0	0	0	0
chr7	129665997	129688984	ZC3HC1	.	0	0	0	0	0
chr6	76376427	76407233	SENP6	.	0	0	0	0	0
chr6	3076997	3078169	RIPK1	.	0	0	0	0	0
chr6	18236682	18237747	DEK	.	0	0	0	0	0
chr5	76330242	76342502	AGGF1	.	0	0	0	0	0
chr5	5292679	5293787	.	ADAMTS16	0	0	0	0	0
chr5	32125898	32143986	GOLPH3	.	2	0	430	0.00928074	0.057032
chr5	171479932	171488272	STK10	.	0	0	0	0	0
chr5	130840318	130883883	RAPGEF6	.	0	0	0	0	0
chr5	118576113	118580271	DMXL1	.	0	0	0	0	0
chr4	83970318	83978561	COPS4	.	0	0	0	0	0
chr4	1961197	1962878	WHSC1	.	2	538	185	0.00552486	0.057032
chr4	129752887	129773423	JADE1	.	0	0	0	0	0
chr3	155547476	155560408	SLC33A1	.	0	0	0	0	0
chr2	9650107	9668083	ADAM17	.	2	115	39	0.0258065	0.057032
chr2	38536520	38546161	ATL2	.	0	0	0	0	0
chr2	29140758	29152576	WDR43	.	0	0	0	0	0
chr2	136402948	136418963	R3HDM1	.	2	53	149	0.0197044	0.057032
chr21	34614190	34633032	IFNAR2	.	0	0	0	0	0
chr21	34614144	34660566	.	IL10RB-AS1	0	0	0	0	0
chr19	34922765	34929671	UBA2	.	0	0	0	0	0
chr19	33600622	33602808	GPATCH1	.	0	0	0	0	0
chr19	2111677	2111827	AP3D1	.	2	35	197	0.0171674	0.057032
chr19	19049161	19049858	HOMER3	.	0	0	0	0	0
chr1	8568685	8617582	RERE	.	0	0	0	0	0
chr18	23612362	23637706	SS18	.	2	55	18	0.0540541	0.057032
chr17	80521229	80521424	FOXK2	.	0	0	0	0	0
chr17	38065210	38066177	GSDMB	.	0	0	0	0	0
chr16	89961445	89967202	TCF25	.	0	0	0	0	0
chr16	71710349	71713438	PHLPP2	.	0	0	0	0	0
chr16	70566381	70575737	SF3B3	.	0	0	0	0	0
chr15	93480747	93518180	CHD2	.	0	0	0	0	0
chr15	68378643	68457142	PIAS1	.	2	14	8	0.173913	0.057032
chr15	63978557	63981898	HERC1	.	0	0	0	0	0
chr15	43102811	43109295	TTBK2	.	0	0	0	0	0
chr1	52937623	52975384	ZCCHC11	.	0	0	0	0	0
chr14	91409421	91467503	RPS6KA5	.	0	0	0	0	0
chr14	76238076	76259443	TTLL5	.	0	0	0	0	0
chr14	73614502	73659572	PSEN1	.	2	32	85	0.0338983	0.057032
chr1	45340349	45341367	EIF2B3	.	0	0	0	0	0
chr13	95886863	95900007	ABCC4	.	0	0	0	0	0
chr12	26864105	26878698	ITPR2	.	2	4	38	0.0930233	0.057032
chr1	198201682	198233365	NEK7	.	0	0	0	0	0
chr11	66515849	66526567	C11orf80	.	0	0	0	0	0
chr10	98703869	98711953	LCOR	.	0	0	0	0	0
chr10	94372796	94381230	KIF11	.	0	0	0	0	0
chrX	53423146	53432323	SMC1A	.	0	0	0	0	0
chrX	46712910	46719537	RP2	.	0	0	0	0	0
chrX	151092840	151093315	MAGEA4	.	0	0	0	0	0
chrX	109263579	109310624	TMEM164	.	0	0	0	0	0
chrX	10031484	10062321	WWC3	.	0	0	0	0	0
chr9	79890413	79908424	VPS13A	.	0	0	0	0	0
chr9	72333252	72356774	PTAR1	.	0	0	0	0	0
chr9	7011697	7015929	KDM4C	.	0	0	0	0	0
chr9	6475390	6486925	UHRF2	.	0	0	0	0	0
chr9	5742868	5774357	RIC1	.	0	0	0	0	0
chr9	33941646	33944637	UBAP2	.	0	0	0	0	0
chr9	20907148	20933102	FOCAD	.	0	0	0	0	0
chr9	15447092	15460311	SNAPC3	.	0	0	0	0	0
chr9	134025710	134039531	NUP214	.	0	0	0	0	0
chr9	130501960	130509550	SH2D3C	.	0	0	0	0	0
chr9	126392654	126439068	DENND1A	.	0	0	0	0	0
chr9	123280704	123280923	CDK5RAP2	.	0	0	0	0	0
chr9	121693396	121739714	.	.	0	0	0	0	0
chr9	117228546	117241051	DFNB31	.	0	0	0	0	0
chr9	107485148	107485999	.	.	0	0	0	0	0
chr8	84324027	84324290	.	.	0	0	0	0	0
chr8	62489330	62496588	ASPH	.	0	0	0	0	0
chr8	17867055	17872349	PCM1	.	0	0	0	0	0
chr8	132952745	132982890	EFR3A	.	0	0	0	0	0
chr8	103845283	103848618	AZIN1	.	0	0	0	0	0
chr8	100568677	100597745	VPS13B	.	0	0	0	0	0
chr7	90339129	90419967	CDK14	.	0	0	0	0	0
chr7	75189035	75190705	HIP1	.	0	0	0	0	0
chr7	44423664	44424743	NUDCD3	.	0	0	0	0	0
chr7	23454866	23458443	IGF2BP3	.	0	0	0	0	0
chr7	148771477	148777809	ZNF786	.	0	0	0	0	0
chr7	14613836	14712652	DGKB	.	0	0	0	0	0
chr7	133002037	133041327	EXOC4	.	0	0	0	0	0
chr7	132973675	133059756	EXOC4	.	0	0	0	0	0
chr7	105131986	105135700	PUS7	.	0	0	0	0	0
chr7	105098208	105108910	PUS7	.	0	0	0	0	0
chr6	86227473	86253478	SNX14	.	0	0	0	0	0
chr6	79770194	79773627	PHIP	.	0	0	0	0	0
chr6	71464682	71508440	SMAP1	.	0	0	0	0	0
chr6	42630995	42633983	UBR2	.	0	0	0	0	0
chr6	35586872	35588051	FKBP5	.	0	0	0	0	0
chr6	157431605	157454341	ARID1B	.	0	0	0	0	0
chr6	136879937	136883753	MAP3K5	.	0	0	0	0	0
chr6	108248082	108248817	.	SEC63	0	0	0	0	0
chr5	94833119	94845391	TTC37	.	0	0	0	0	0
chr5	78692645	78734972	HOMER1	.	0	0	0	0	0
chr5	77458642	77512061	AP3B1	.	0	0	0	0	0
chr5	77406030	77409747	AP3B1	.	0	0	0	0	0
chr5	53839008	53913760	.	.	0	0	0	0	0
chr5	40764615	40777688	PRKAA1	.	0	0	0	0	0
chr5	39002636	39030674	RICTOR	.	0	0	0	0	0
chr5	139889221	139889766	ANKHD1	.	0	0	0	0	0
chr5	139876104	139889766	ANKHD1	.	0	0	0	0	0
chr5	100222046	100222304	ST8SIA4	.	0	0	0	0	0
chr4	88957371	88987031	PKD2	.	0	0	0	0	0
chr4	42505466	42546003	ATP8A1	.	0	0	0	0	0
chr4	42236178	42253245	.	.	0	0	0	0	0
chr4	40892380	40895428	APBB2	.	0	0	0	0	0
chr4	39306433	39308324	RFC1	KLHL5	0	0	0	0	0
chr4	3101000	3190820	HTT	.	0	0	0	0	0
chr4	186111296	186112366	CFAP97	.	0	0	0	0	0
chr4	148886174	148944564	ARHGAP10	.	0	0	0	0	0
chr4	140255327	140262223	NAA15	.	0	0	0	0	0
chr4	121675707	121732604	PRDM5	.	0	0	0	0	0
chr3	62136776	62142898	PTPRG	.	0	0	0	0	0
chr3	50106122	50107985	RBM6	.	0	0	0	0	0
chr3	44816745	44828066	KIF15	.	0	0	0	0	0
chr3	31474128	31477474	.	.	0	0	0	0	0
chr3	195605123	195615477	TNK2	.	0	0	0	0	0
chr3	195533238	195533389	MUC4	.	0	0	0	0	0
chr3	171944660	171965566	FNDC3B	.	0	0	0	0	0
chr3	167217940	167254788	WDR49	.	0	0	0	0	0
chr3	158399783	158409437	GFM1	.	0	0	0	0	0
chr3	158376710	158399946	GFM1	LXN	0	0	0	0	0
chr3	129579782	129599402	TMCC1	.	0	0	0	0	0
chr3	129557740	129599402	TMCC1	.	0	0	0	0	0
chr3	124456414	124459046	UMPS	.	0	0	0	0	0
chr3	121448034	121449820	GOLGB1	.	0	0	0	0	0
chr2	99135426	99193606	INPP4A	.	0	0	0	0	0
chr2	38795340	38818790	HNRNPLL	.	0	0	0	0	0
chr2	32602655	32605358	BIRC6	.	0	0	0	0	0
chr22	47274548	47290742	TBC1D22A	.	0	0	0	0	0
chr22	43203078	43206950	ARFGAP3	.	0	0	0	0	0
chr22	42262834	42281015	SREBF2	.	0	0	0	0	0
chr2	24181170	24199945	UBXN2A	.	0	0	0	0	0
chr2	24103508	24108699	ATAD2B	.	0	0	0	0	0
chr2	240944626	240961757	NDUFA10	.	0	0	0	0	0
chr2	24021007	24046439	ATAD2B	.	0	0	0	0	0
chr2	239090705	239098613	ILKAP	.	0	0	0	0	0
chr2	228004876	228012300	COL4A4	.	0	0	0	0	0
chr22	24734353	24743144	SPECC1L	.	0	0	0	0	0
chr2	207395608	207414884	ADAM23	.	0	0	0	0	0
chr2	206997668	207009750	NDUFS1	.	0	0	0	0	0
chr2	203997780	204001497	NBEAL1	.	0	0	0	0	0
chr2	202144826	202145194	CASP8	.	0	0	0	0	0
chr2	191765289	191769893	GLS	.	0	0	0	0	0
chr2	178284996	178310354	AGPS	.	0	0	0	0	0
chr2	173377061	173377246	.	.	0	0	0	0	0
chr21	47801608	47811291	PCNT	.	0	0	0	0	0
chr21	45945048	45945207	.	TSPEAR	0	0	0	0	0
chr2	136505836	136530117	UBXN4	.	0	0	0	0	0
chr2	128481906	128484351	WDR33	.	0	0	0	0	0
chr20	3888572	3897697	PANK2	.	0	0	0	0	0
chr20	34430494	34519366	PHF20	.	0	0	0	0	0
chr19	8533657	8539128	HNRNPM	.	0	0	0	0	0
chr19	4422562	4498912	.	UBXN6	0	0	0	0	0
chr19	39866289	39869229	SAMD4B	.	0	0	0	0	0
chr19	1611702	1615820	TCF3	.	0	0	0	0	0
chr19	11240188	11242471	LDLR	.	0	0	0	0	0
chr19	10396113	10396344	.	ICAM1	0	0	0	0	0
chr18	9195548	9235907	ANKRD12	.	0	0	0	0	0
chr18	9195548	9216898	ANKRD12	.	0	0	0	0	0
chr18	67718646	67727278	RTTN	.	0	0	0	0	0
chr1	8555122	8617582	RERE	.	0	0	0	0	0
chr18	53763305	53770066	.	LINC01539	0	0	0	0	0
chr18	45415391	45423180	SMAD2	.	0	0	0	0	0
chr18	40922901	40923052	.	.	0	0	0	0	0
chr18	18588019	18600200	ROCK1	.	0	0	0	0	0
chr18	18586311	18608896	ROCK1	.	0	0	0	0	0
chr1	78181426	78191447	USP33	.	0	0	0	0	0
chr1	78063379	78107340	ZZZ3	.	0	0	0	0	0
chr17	54978779	54985924	TRIM25	.	0	0	0	0	0
chr17	47778002	47778872	SLC35B1	.	0	0	0	0	0
chr17	19839598	19861884	AKAP10	.	0	0	0	0	0
chr17	17158172	17165420	COPS3	.	0	0	0	0	0
chr17	13796041	13861594	.	.	0	0	0	0	0
chr1	70761812	70771973	ANKRD13C	.	0	0	0	0	0
chr16	69402278	69406258	TERF2	.	0	0	0	0	0
chr16	68321648	68331379	SLC7A6	.	0	0	0	0	0
chr16	66756455	66756704	DYNC1LI2	.	0	0	0	0	0
chr1	65095037	65107652	CACHD1	.	0	0	0	0	0
chr16	1837637	1838036	.	NUBP2	0	0	0	0	0
chr16	11778020	11781822	TXNDC11	.	0	0	0	0	0
chr15	93480747	93482948	CHD2	.	0	0	0	0	0
chr15	90760670	90763123	SEMA4B	.	0	0	0	0	0
chr15	66169669	66170293	RAB11A	.	0	0	0	0	0
chr15	65994642	65995346	DENND4A	.	0	0	0	0	0
chr15	49303927	49320879	SECISBP2L	.	0	0	0	0	0
chr15	44898222	44912601	SPG11	.	0	0	0	0	0
chr15	42850395	42853068	HAUS2	.	0	0	0	0	0
chr15	41044734	41045977	.	RMDN3	0	0	0	0	0
chr14	93182480	93183806	LGMN	.	0	0	0	0	0
chr14	89220855	89221015	EML5	.	0	0	0	0	0
chr14	81297486	81382906	CEP128	.	0	0	0	0	0
chr14	78390799	78399987	ADCK1	.	0	0	0	0	0
chr14	71116061	71116518	.	TTC9	0	0	0	0	0
chr14	53464387	53469399	.	.	0	0	0	0	0
chr14	51208299	51211083	NIN	.	0	0	0	0	0
chr14	45475210	45495075	FAM179B	.	0	0	0	0	0
chr1	41448949	41463198	CTPS1	.	0	0	0	0	0
chr14	103148231	103180954	RCOR1	.	0	0	0	0	0
chr1	40672955	40673957	RLF	.	0	0	0	0	0
chr13	95768175	95822882	ABCC4	.	0	0	0	0	0
chr13	73333610	73349513	DIS3	.	0	0	0	0	0
chr13	61013821	61109367	TDRD3	.	0	0	0	0	0
chr13	52971366	52976829	THSD1	.	0	0	0	0	0
chr13	49741379	49752790	FNDC3A	.	0	0	0	0	0
chr13	45978461	45983209	SLC25A30	.	0	0	0	0	0
chr13	26535712	26542817	ATP8A2	.	0	0	0	0	0
chr13	103309405	103317286	TPP2	.	0	0	0	0	0
chr1	29010094	29023596	GMEB1	.	0	0	0	0	0
chr12	72017139	72018072	ZFC3H1	.	0	0	0	0	0
chr12	69962784	69965214	FRS2	.	0	0	0	0	0
chr12	69218142	69222729	MDM2	.	0	0	0	0	0
chr12	58089562	58109753	OS9	.	0	0	0	0	0
chr12	53800368	53803345	SP1	.	0	0	0	0	0
chr12	49918464	49921496	SPATS2	.	0	0	0	0	0
chr12	4626226	4634749	C12orf4	.	0	0	0	0	0
chr12	4219087	4219400	.	.	0	0	0	0	0
chr1	233321276	233322241	PCNX2	.	0	0	0	0	0
chr12	32133811	32145683	KIAA1551	.	0	0	0	0	0
chr12	30783593	30789991	IPO8	.	0	0	0	0	0
chr1	227300012	227300614	CDC42BPA	.	0	0	0	0	0
chr12	23206924	23210831	.	.	0	0	0	0	0
chr12	123281853	123290842	CCDC62	.	0	0	0	0	0
chr12	123262037	123265877	CCDC62	.	0	0	0	0	0
chr12	12022357	12022903	ETV6	.	0	0	0	0	0
chr12	112403398	112441667	TMEM116	.	0	0	0	0	0
chr12	112096539	112117144	BRAP	.	0	0	0	0	0
chr12	101750331	101759403	UTP20	.	0	0	0	0	0
chr12	101750331	101755838	UTP20	.	0	0	0	0	0
chr11	98925446	98939775	.	CNTN5	0	0	0	0	0
chr11	94163076	94189504	MRE11A	.	0	0	0	0	0
chr1	193456519	193457178	.	.	0	0	0	0	0
chr1	183469391	183471526	SMG7	.	0	0	0	0	0
chr1	178846632	178855255	RALGPS2	.	0	0	0	0	0
chr11	77043774	77064644	PAK1	.	0	0	0	0	0
chr1	174363132	174384995	RABGAP1L	.	0	0	0	0	0
chr1	173915613	173921276	RC3H1	.	0	0	0	0	0
chr11	72548575	72552004	FCHSD2	.	0	0	0	0	0
chr1	167661528	167663539	RCSD1	.	0	0	0	0	0
chr1	154420600	154427057	IL6R	.	0	0	0	0	0
chr1	154150658	154151010	TPM3	.	0	0	0	0	0
chr1	153916815	153917273	.	DENND4B	0	0	0	0	0
chr11	35226058	35232996	CD44	.	0	0	0	0	0
chr11	35211544	35250895	.	CD44	0	0	0	0	0
chr11	34104501	34107766	CAPRIN1	.	0	0	0	0	0
chr1	117948170	117957453	MAN1A2	.	0	0	0	0	0
chr11	118454523	118461221	ARCN1	.	0	0	0	0	0
chr11	111558724	111593480	SIK2	.	0	0	0	0	0
chr11	107224249	107300177	CWF19L2	.	0	0	0	0	0
chr11	103173821	103229087	DYNC2H1	.	0	0	0	0	0
chr11	102953476	102954055	DCUN1D5	.	0	0	0	0	0
chr10	35477127	35495979	CREM	.	0	0	0	0	0
chr10	34540529	34542583	PARD3	.	0	0	0	0	0
chr10	27821435	27822923	RAB18	.	0	0	0	0	0
chr10	14896123	14897942	HSPA14	.	0	0	0	0	0
chr10	1296102	1296224	.	ADARB2	0	0	0	0	0
chr10	12159671	12162266	DHTKD1	.	0	0	0	0	0
chr10	104859682	104866463	NT5C2	.	0	0	0	0	0
chr10	104120778	104125356	GBF1	.	0	0	0	0	0
chr10	103699619	103717489	C10orf76	.	0	0	0	0	0
chr8	107691437	107705105	OXR1	.	25	511	88	0.0833333	0.7129
chr8	80963761	80976828	TPD52	.	22	273	1332	0.0273973	0.627352
chr9	4860124	4860901	RCL1	.	16	46	1	0.666667	0.456256
chr18	12999419	13042333	CEP192	.	15	7	102	0.272727	0.42774
chr7	156619298	156629579	LMBR1	.	6	3	6	1.2	0.171096
chr1	162535801	162538176	UAP1	.	17	2541	1	0.01337	0.484772
chr8	42819453	42829337	HOOK3	.	14	205	70	0.101449	0.399224
chr3	143704384	143708679	C3orf58	.	9	12	0	1.38462	0.256644
chr4	75040222	75067087	MTHFD2L	.	17	4	29	1	0.484772
chr3	71739160	71748859	EIF4E3	.	12	8	8	1.41176	0.342192
chr19	50838315	50862904	.	.	0	0	0	0	0
chr4	129857809	129891623	SCLT1	.	21	22	68	0.461538	0.598836
chr12	109046047	109048186	CORO1C	.	0	0	0	0	0
chr3	121563299	121591635	EAF2	.	12	71	222	0.0816327	0.342192
chr2	170401230	170413807	FASTKD1	.	12	90	187	0.0863309	0.342192
chr11	108186549	108206688	ATM	.	2	127	7	0.0296296	0.057032
chr2	200233327	200246543	SATB2	.	9	4	60	0.276923	0.256644
chr1	35846859	35855699	ZMYM4	.	8	63	6	0.228571	0.228128
chr8	98725889	98731417	MTDH	.	3	1474	3016	0.00133601	0.085548
chr16	68308593	68309152	SLC7A6	.	8	17	82	0.16	0.228128
chr20	47895640	47897501	ZFAS1	.	2	545	193	0.00541272	0.057032
chr11	118425173	118430579	IFT46	.	5	153	57	0.0473934	0.14258
chr11	93523739	93527201	MED17	.	7	334	146	0.029106	0.199612
chr20	40141484	40143591	CHD6	.	14	21	122	0.194444	0.399224
chr14	23395341	23396869	PRMT5	.	6	45	59	0.114286	0.171096
chr6	146209155	146216113	SHPRH	.	4	46	18	0.123077	0.114064
chr5	154330380	154346797	MRPL22	.	7	34	0	0.4	0.199612
chr3	27420739	27465643	SLC4A7	.	8	11	22	0.470588	0.228128
chr7	24663284	24720139	MPP6	.	4	14	39	0.148148	0.114064
chr2	206992520	206994966	NDUFS1	.	4	189	127	0.0252366	0.114064
chr20	43600718	43623898	STK4	.	8	62	52	0.13913	0.228128
chr1	6867042	6885270	CAMTA1	.	6	2	20	0.521739	0.171096
chr5	176636636	176639196	NSD1	.	7	16	43	0.233333	0.199612
chr10	70547683	70548085	CCAR1	.	14	74	46	0.231405	0.399224
chr11	108046972	108047817	NPAT	.	0	0	0	0	0
chr7	23015828	23030758	FAM126A	.	0	0	0	0	0
chr9	86293355	86301070	UBQLN1	.	0	0	0	0	0
chr4	38091552	38104778	TBC1D1	.	6	22	38	0.196721	0.171096
chr6	76331247	76344527	SENP6	.	2	63	19	0.0481928	0.057032
chr11	34111725	34113603	CAPRIN1	.	6	249	40	0.0413793	0.171096
chr14	100847246	100848083	WDR25	.	0	0	0	0	0
chr2	45773870	45780869	SRBD1	.	9	14	18	0.545455	0.256644
chr15	87949593	87965267	.	.	0	0	0	0	0
chr1	150464886	150470223	TARS2	.	6	44	39	0.142857	0.171096
chrX	134679347	134686071	INTS6L	.	6	39	19	0.20339	0.171096
chr12	1399017	1481143	ERC1	.	4	125	18	0.0555556	0.114064
chr5	64824278	64825026	CENPK	.	4	29	61	0.0879121	0.114064
chr6	7176887	7189555	RREB1	.	0	0	0	0	0
chr3	167754623	167759262	GOLIM4	.	7	196	211	0.0343137	0.199612
chr9	88200377	88248289	AGTPBP1	.	4	52	48	0.0792079	0.114064
chr17	45695715	45696530	NPEPPS	.	0	0	0	0	0
chr1	33760537	33760906	ZNF362	.	5	8	1	1	0.14258
chr7	8257934	8275635	ICA1	.	3	8	23	0.1875	0.085548
chr17	35936438	35945538	SYNRG	.	5	5	63	0.144928	0.14258
chr12	121220457	121222396	SPPL3	.	4	1	0	4	0.114064
chr18	72342922	72353078	ZNF407	.	4	6	13	0.4	0.114064
chr11	117109316	117110576	RNF214	.	5	47	49	0.103093	0.14258
chr7	158580694	158591763	ESYT2	.	7	36	5	0.333333	0.199612
chr21	46538478	46554747	ADARB1	.	4	1	44	0.173913	0.114064
chr5	127474288	127488497	SLC12A2	.	4	133	6	0.0571429	0.114064
chr12	112096539	112097149	BRAP	.	0	0	0	0	0
chr9	112898406	112900819	PALM2	.	0	0	0	0	0
chr3	120469369	120469847	GTF2E1	.	12	28	51	0.3	0.342192
chr2	97024782	97026448	NCAPH	.	7	95	96	0.0729167	0.199612
chr11	47774467	47776216	FNBP4	.	0	0	0	0	0
chr8	42862989	42873637	HOOK3	.	9	39	0	0.45	0.256644
chr2	240929490	240961757	NDUFA10	.	2	53	90	0.0277778	0.057032
chr1	23356961	23377013	KDM1A	.	6	8	16	0.48	0.171096
chr15	73052747	73067438	ADPGK	.	3	24	126	0.0397351	0.085548
chr8	42819453	42841938	HOOK3	.	8	205	336	0.0295203	0.228128
chr2	73315177	73316443	RAB11FIP5	.	11	0	27	0.785714	0.313676
chr2	170411633	170413807	FASTKD1	.	0	0	0	0	0
chr10	225933	267296	ZMYND11	.	8	50	122	0.0924855	0.228128
chr4	32147674	32159703	LOC102723828	.	0	0	0	0	0
chr8	41905895	41907225	KAT6A	.	0	0	0	0	0
chr6	73016960	73043538	RIMS1	.	7	11	0	1.16667	0.199612
chr20	46385932	46386207	SULF2	.	9	159	238	0.0452261	0.256644
chr9	110062421	110074018	RAD23B	.	3	129	39	0.035503	0.085548
chr9	134305476	134308181	PRRC2B	.	7	6	25	0.4375	0.199612
chr17	19861326	19861884	AKAP10	.	4	22	15	0.210526	0.114064
chr16	19717913	19722762	KNOP1	.	13	0	50	0.509804	0.370708
chr14	81362061	81382906	CEP128	.	5	161	93	0.0392157	0.14258
chr13	31204971	31205611	USPL1	.	4	42	26	0.115942	0.114064
chr12	5269472	5281055	.	.	4	3	5	0.888889	0.114064
chr11	120310837	120317794	ARHGEF12	.	10	422	772	0.0167364	0.28516
chr8	29959413	29962002	LEPROTL1	MIR548O2	2	29	76	0.0377358	0.057032
chr4	52729602	52758017	DCUN1D4	.	0	0	0	0	0
chr14	66028054	66028484	FUT8	.	2	3	91	0.0421053	0.057032
chr20	45874751	45875261	ZMYND8	.	9	4	147	0.118421	0.256644
chr3	196831773	196846401	DLG1	.	0	0	0	0	0
chr2	48049356	48050499	FBXO11	.	0	0	0	0	0
chr18	42281139	42287187	SETBP1	.	9	10	16	0.666667	0.256644
chr17	57430575	57430887	YPEL2	.	12	3	0	6	0.342192
chr6	45399599	45405788	RUNX2	.	2	13	39	0.0754717	0.057032
chr19	18650180	18650530	FKBP8	.	5	30	60	0.10989	0.14258
chr11	107965117	107966418	CUL5	.	6	14	125	0.0857143	0.171096
chr6	13639794	13644961	RANBP9	.	5	102	0	0.0970874	0.14258
chr5	122881110	122911657	CSNK1G3	.	0	0	0	0	0
chr1	180366650	180382606	ACBD6	.	0	0	0	0	0
chr3	138289159	138290198	CEP70	.	7	79	24	0.134615	0.199612
chr6	7303782	7310262	SSR1	.	0	0	0	0	0
chr7	91842508	91855996	KRIT1	.	2	15	81	0.0412371	0.057032
chr15	63845913	63855207	USP3	.	3	45	6	0.115385	0.085548
chr12	69222550	69233581	MDM2	.	3	907	0	0.00660793	0.085548
chr12	105321750	105322472	SLC41A2	.	5	16	9	0.384615	0.14258
chr1	151288048	151288985	PI4KB	.	0	0	0	0	0
chr15	75219106	75221573	COX5A	.	0	0	0	0	0
chr18	48450467	48458730	ME2	.	0	0	0	0	0
chr7	24659670	24690331	MPP6	.	2	1	69	0.056338	0.057032
chr12	111947352	111948386	ATXN2	.	5	18	3	0.454545	0.14258
chr18	9208654	9221997	ANKRD12	.	3	198	14	0.028169	0.085548
chr12	12397195	12397589	LRP6	.	3	10	7	0.333333	0.085548
chr10	7262372	7327916	SFMBT2	.	5	4	11	0.625	0.14258
chrX	53430497	53430825	SMC1A	.	4	173	95	0.0297398	0.114064
chr8	18656804	18662408	PSD3	.	0	0	0	0	0
chr7	35707043	35712888	HERPUD2	.	7	12	18	0.451613	0.199612
chr5	75884730	75886411	IQGAP2	.	4	68	39	0.0740741	0.114064
chr4	25848915	25849486	SEL1L3	.	3	53	39	0.0645161	0.085548
chr12	31595708	31600703	DENND5B	.	0	0	0	0	0
chr11	13435076	13443385	BTBD10	.	2	19	77	0.0412371	0.057032
chr6	35280078	35280549	DEF6	.	0	0	0	0	0
chr19	17212469	17213367	MYO9B	.	2	6	25	0.125	0.057032
chr17	76000250	76027923	TNRC6C	.	4	4	7	0.666667	0.114064
chr3	3178943	3182332	TRNT1	.	11	31	27	0.372881	0.313676
chr18	74090809	74092259	ZNF516	.	4	4	5	0.8	0.114064
chr19	49416267	49416821	NUCB1	NUCB1-AS1	2	371	156	0.00757576	0.057032
chr8	68015271	68049838	CSPP1	.	6	38	58	0.123711	0.171096
chr20	32996456	33001685	ITCH	.	8	444	471	0.0174672	0.228128
chr1	9991948	9995685	LZIC	.	5	9	19	0.344828	0.14258
chrX	149761066	149787612	MTM1	.	0	0	0	0	0
chr9	35231116	35243361	UNC13B	.	2	5	26	0.125	0.057032
chr2	233651863	233660935	GIGYF2	.	11	0	0	22	0.313676
chr13	41515056	41518061	ELF1	.	6	24	182	0.057971	0.171096
chr4	25315667	25317022	ZCCHC4	.	0	0	0	0	0
chr5	153413350	153414527	FAM114A2	.	0	0	0	0	0
chr12	49890615	49893988	SPATS2	.	0	0	0	0	0
chr3	170077486	170109048	SKIL	.	2	24	59	0.047619	0.057032
chr11	108172374	108175579	ATM	.	3	103	52	0.0384615	0.085548
chr11	85685750	85742653	PICALM	.	4	66	31	0.0816327	0.114064
chr10	35349801	35360267	CUL2	.	0	0	0	0	0
chr2	24357988	24369956	FAM228B	.	2	0	1	2	0.057032
chr5	72370568	72373320	FCHO2	.	0	0	0	0	0
chr5	10213602	10227759	.	.	9	1	21	0.782609	0.256644
chr4	153391092	153403825	FBXW7	.	14	0	0	28	0.399224
chr22	38933596	38964294	DMC1	.	4	8	11	0.4	0.114064
chr17	37933903	37949186	IKZF3	.	9	42	286	0.0547112	0.256644
chr13	42385360	42393522	VWA8	.	3	8	52	0.0983607	0.085548
chr1	184675776	184681011	EDEM3	.	2	701	201	0.00442968	0.057032
chr11	34978930	35013926	PDHX	.	5	468	4	0.0211416	0.14258
chr2	53941520	53943880	ASB3	.	7	116	19	0.102941	0.199612
chr20	47708582	47711500	CSE1L	.	0	0	0	0	0
chr4	1902352	1941505	WHSC1	.	2	2	188	0.0209424	0.057032
chr19	3660963	3661999	PIP5K1C	.	0	0	0	0	0
chrX	24190831	24197887	ZFX	.	0	0	0	0	0
chr8	42761315	42805598	HOOK3	.	0	0	0	0	0
chr6	109232101	109286343	ARMC2	ARMC2-AS1	4	54	52	0.0747664	0.114064
chr5	70888752	70900295	MCCC2	.	5	63	12	0.131579	0.14258
chr5	6623326	6625782	NSUN2	.	0	0	0	0	0
chr4	48686689	48689177	FRYL	.	4	4	2	1.14286	0.114064
chr2	111406810	111419418	BUB1	.	6	237	196	0.0276498	0.171096
chr20	47895640	47897107	ZFAS1	.	0	0	0	0	0
chr14	96807858	96813678	ATG2B	.	6	11	6	0.666667	0.171096
chr11	85718584	85742653	PICALM	.	8	4	31	0.444444	0.228128
chr1	175070268	175070406	.	TNN	0	0	0	0	0
chr15	66727364	66729230	MAP2K1	.	7	56	96	0.0915033	0.199612
chr9	79952170	79986065	VPS13A	.	4	40	41	0.097561	0.114064
chr12	62864480	62895478	MON2	.	3	10	45	0.107143	0.085548
chr6	90087389	90097309	RRAGD	.	0	0	0	0	0
chr11	17190223	17191353	PIK3C2A	.	3	36	110	0.0408163	0.085548
chr2	215609790	215661841	BARD1	.	0	0	0	0	0
chr10	27453992	27454468	MASTL	.	0	0	0	0	0
chr10	116879948	116925405	ATRNL1	.	2	12	108	0.0330579	0.057032
chr4	37633006	37640126	RELL1	.	5	5	11	0.588235	0.14258
chr1	47761436	47767420	STIL	.	0	0	0	0	0
chr7	104678572	104681470	KMT2E	.	2	2	79	0.0487805	0.057032
chr4	77045801	77065626	NUP54	.	5	105	53	0.0628931	0.14258
chr8	56854413	56866543	LYN	.	7	51	14	0.212121	0.199612
chr22	37328806	37330036	CSF2RB	.	0	0	0	0	0
chr11	120318582	120338017	ARHGEF12	.	2	772	562	0.00299625	0.057032
chr3	71739160	71759635	EIF4E3	.	3	8	6	0.4	0.085548
chr3	47139444	47147610	SETD2	.	3	6	23	0.2	0.085548
chr14	102506572	102507010	DYNC1H1	.	0	0	0	0	0
chr10	17746429	17747740	STAM	.	4	34	17	0.153846	0.114064
chr18	59739905	59763183	PIGN	.	0	0	0	0	0
chr12	14576842	14578407	ATF7IP	.	9	17	72	0.2	0.256644
chr17	49294694	49302570	MBTD1	.	7	2	12	0.933333	0.199612
chr18	48573289	48593557	SMAD4	.	3	16	48	0.0923077	0.085548
chr8	101276261	101300495	RNF19A	.	0	0	0	0	0
chr6	170626457	170639638	FAM120B	.	0	0	0	0	0
chr16	53472927	53481018	RBL2	.	3	49	11	0.0983607	0.085548
chr16	4516153	4519466	NMRAL1	.	4	44	203	0.0322581	0.114064
chr9	77611362	77632364	CARNMT1	C9orf41-AS1	8	37	157	0.0820513	0.228128
chr8	80830212	80831383	.	.	0	0	0	0	0
chr6	90556280	90566918	CASP8AP2	.	2	5	59	0.0615385	0.057032
chr6	57058639	57075243	RAB23	.	2	16	24	0.097561	0.057032
chr5	109117096	109125228	MAN2A1	.	0	0	0	0	0
chr4	159634270	159636836	PPID	.	6	178	346	0.0228571	0.171096
chr20	34309661	34320057	RBM39	.	9	113	1044	0.015544	0.256644
chr18	48422178	48466756	ME2	.	0	0	0	0	0
chr11	61205096	61205585	SDHAF2	.	0	0	0	0	0
chr10	7405839	7423911	SFMBT2	.	6	0	15	0.75	0.171096
chr3	122156016	122160963	KPNA1	LOC102723582	0	0	0	0	0
chr4	108603170	108622441	PAPSS1	.	7	68	19	0.159091	0.199612
chr22	34157357	34161940	LARGE	.	2	7	0	0.5	0.057032
chr8	101271334	101277013	RNF19A	.	0	0	0	0	0
chr8	68024206	68031056	CSPP1	.	0	0	0	0	0
chr11	82560090	82571159	PRCP	.	4	6	8	0.533333	0.114064
chr4	187627716	187630999	FAT1	.	0	0	0	0	0
chr1	78183551	78191447	USP33	.	4	75	62	0.057971	0.114064
chr12	95887831	95889874	METAP2	.	5	449	292	0.0134771	0.14258
chr9	134518625	134526336	RAPGEF1	.	0	0	0	0	0
chr9	134381500	134381840	POMT1	.	0	0	0	0	0
chr7	80418621	80440017	SEMA3C	.	0	0	0	0	0
chr7	22347957	22357656	RAPGEF5	.	0	0	0	0	0
chr4	54292038	54294350	FIP1L1	.	0	0	0	0	0
chr2	70451685	70463307	TIA1	.	2	55	74	0.0307692	0.057032
chr2	113057425	113082774	ZC3H6	.	0	0	0	0	0
chr20	40161688	40179999	CHD6	.	0	0	0	0	0
chr18	34643483	34647508	KIAA1328	.	0	0	0	0	0
chr1	76205664	76216231	ACADM	DLSTP1	2	162	40	0.0197044	0.057032
chr17	15974722	15976883	NCOR1	.	2	46	121	0.0238095	0.057032
chr14	97312431	97327072	VRK1	.	0	0	0	0	0
chr14	81302548	81307112	CEP128	.	5	343	288	0.0158228	0.14258
chr1	155695172	155695810	DAP3	.	0	0	0	0	0
chr1	145592632	145595220	POLR3C	NBPF20	2	0	36	0.108108	0.057032
chr1	117944807	118009049	MAN1A2	.	6	357	29	0.0310078	0.171096
chr10	111667448	111674857	XPNPEP1	.	0	0	0	0	0
chr20	46252654	46256767	NCOA3	.	3	207	78	0.020979	0.085548
chr18	2732262	2747645	SMCHD1	.	0	0	0	0	0
chr1	153637695	153641033	ILF2	.	2	431	47	0.00835073	0.057032
chr5	64084777	64100213	CWC27	.	0	0	0	0	0
chr11	118453893	118455359	ARCN1	.	0	0	0	0	0
chr12	117423010	117426674	FBXW8	LOC100506551	0	0	0	0	0
chrX	151804335	151809756	.	GABRQ	2	6	0	0.571429	0.057032
chr8	42761315	42814457	HOOK3	.	0	0	0	0	0
chr6	43492208	43494485	XPO5	POLR1C	0	0	0	0	0
chr4	77065301	77065626	NUP54	.	0	0	0	0	0
chr2	210962809	211019335	KANSL1L	.	3	6	0	0.857143	0.085548
chr2	109945679	109964405	SH3RF3	.	2	0	11	0.333333	0.057032
chr18	76856475	76886375	ATP9B	.	0	0	0	0	0
chr16	18851019	18853776	SMG1	.	0	0	0	0	0
chr15	63821212	63829355	USP3	.	0	0	0	0	0
chr14	66082695	66096324	FUT8	.	0	0	0	0	0
chr14	40124048	40125012	.	.	2	4	3	0.5	0.057032
chr12	4626226	4628046	C12orf4	.	6	120	157	0.0431655	0.171096
chr11	120318582	120340097	ARHGEF12	.	0	0	0	0	0
chr6	44900389	44988369	SUPT3H	.	4	10	144	0.0516129	0.114064
chr9	2191265	2192802	SMARCA2	.	0	0	0	0	0
chr19	1218415	1219412	STK11	.	0	0	0	0	0
chr16	53175090	53191453	CHD9	.	0	0	0	0	0
chr5	86627164	86633908	RASA1	.	3	78	4	0.0722892	0.085548
chr12	122825299	122826244	CLIP1	.	0	0	0	0	0
chr7	151873275	151875095	KMT2C	.	4	12	28	0.195122	0.114064
chr12	121853961	121855714	RNF34	.	2	36	224	0.0153257	0.057032
chr5	74842834	74848416	POLK	.	0	0	0	0	0
[truncated: 4,369 more rows]

## Sheet: LR+HDACi
chrom	start	end	sense_gene	antisense_gene	Len +pan junction	SA	SD	Len +pan CTL	Len +pan RPM
chr4	1905942	1936989	WHSC1	.	244	251	1192	0.33795	7.1354
chr19	24014398	24016323	.	.	106	61	12	2.86486	3.0998
chr4	153332454	153333681	FBXW7	.	64	25	3	4.41379	1.87158
chr4	1905942	1920350	WHSC1	.	136	251	1163	0.192226	3.97711
chr6	4891946	4892613	CDYL	.	78	45	40	1.81395	2.28099
chr17	37933903	37934020	IKZF3	.	65	57	359	0.311751	1.90082
chr14	81297486	81307112	CEP128	.	68	107	205	0.434505	1.98855
chr18	9182379	9221997	ANKRD12	.	43	27	4	2.6875	1.25747
chr1	117944807	117963271	MAN1A2	.	87	294	25	0.54375	2.54418
chr12	1136913	1137738	ERC1	.	95	85	32	1.61017	2.77813
chr19	23541231	23545527	ZNF91	.	55	1	28	3.66667	1.60839
chr11	33307958	33309057	HIPK3	.	32	12	20	1.93939	0.93579
chr7	139415730	139416814	HIPK2	.	34	146	16	0.417178	0.994276
chr8	52773404	52773806	PCMTD1	.	90	75	68	1.25	2.63191
chr14	23378691	23380612	RBM23	.	38	160	210	0.204852	1.11125
chr4	144464661	144465125	SMARCA5	.	60	263	81	0.347826	1.75461
chr16	30495147	30495584	ITGAL	.	28	170	50	0.253394	0.818816
chr11	130130750	130131824	ZBTB44	.	29	22	7	1.93333	0.848059
chr1	1586822	1650894	CDK11B	MMP23A	34	0	14	4.53333	0.994276
chr14	97299803	97327072	VRK1	.	43	19	258	0.309353	1.25747
chr3	31617887	31621588	STT3B	.	15	255	100	0.0842697	0.438651
chr1	1158623	1159348	SDF4	.	51	89	335	0.24	1.49141
chr3	56626997	56628056	CCDC66	.	57	29	114	0.791667	1.66688
chr17	80521229	80526077	FOXK2	.	56	44	13	1.93103	1.63763
chr2	72945231	72960247	EXOC6B	.	25	11	33	1.11111	0.731086
chr4	73950965	73958017	ANKRD17	.	12	19	0	1.2	0.350921
chr11	120345268	120348235	ARHGEF12	.	29	567	195	0.0760157	0.848059
chr6	79752559	79770535	PHIP	.	46	72	39	0.821429	1.3452
chr1	155823066	155823597	GON4L	.	20	50	14	0.615385	0.584868
chr7	148543561	148544397	EZH2	.	2	59	10	0.0571429	0.0584868
chr15	64791491	64792365	ZNF609	.	31	3	3	8.85714	0.906546
chr7	99621041	99621930	ZKSCAN1	.	63	27	12	3.15	1.84234
chr4	87967317	87968746	AFF1	.	40	89	6	0.833333	1.16974
chr1	117944807	117957453	MAN1A2	.	31	294	157	0.137168	0.906546
chr8	42761315	42798588	HOOK3	.	11	101	17	0.184874	0.321678
chr19	13039155	13039661	FARSA	.	34	47	71	0.571429	0.994276
chr22	42915719	42976365	.	SERHL2	17	36	5	0.809524	0.497138
chr14	81209418	81244390	CEP128	.	32	15	55	0.901408	0.93579
chr20	46252654	46262380	NCOA3	.	32	220	29	0.256	0.93579
chr16	68155889	68160513	NFATC3	.	20	3	57	0.655738	0.584868
chr9	138773478	138774924	CAMSAP1	.	15	92	36	0.232558	0.438651
chr1	155644800	155649303	YY1AP1	.	17	154	24	0.189944	0.497138
chr12	69210591	69218431	MDM2	.	14	514	630	0.0244541	0.409408
chr5	122881110	122893258	CSNK1G3	.	15	19	55	0.4	0.438651
chr18	42529845	42533305	SETBP1	.	25	95	75	0.292398	0.731086
chr1	117944807	117948267	MAN1A2	.	46	294	191	0.1893	1.3452
chr10	70719561	70720005	DDX21	.	40	464	194	0.121396	1.16974
chr2	200233327	200298237	SATB2	.	24	9	8	2.66667	0.701842
chr10	5836847	5842668	GDI2	.	28	344	639	0.0569106	0.818816
chr18	19345732	19359646	MIB1	.	18	91	60	0.236842	0.526382
chr3	171965322	171969331	FNDC3B	.	17	70	75	0.232877	0.497138
chr4	1905942	1932497	WHSC1	.	28	251	1510	0.0317821	0.818816
chr18	9195548	9221997	ANKRD12	.	17	394	4	0.085213	0.497138
chr5	109049220	109065214	MAN2A1	.	11	56	17	0.297297	0.321678
chr1	117944807	117984947	MAN1A2	.	30	294	22	0.189274	0.877303
chr2	37543379	37544322	PRKD3	.	25	7	25	1.51515	0.731086
chr11	120343758	120348235	ARHGEF12	.	9	566	195	0.023622	0.263191
chr16	80718434	80719026	CDYL2	.	9	16	25	0.428571	0.263191
chr12	1399017	1399178	ERC1	.	18	190	28	0.164384	0.526382
chr13	49712882	49720071	FNDC3A	.	8	50	52	0.15534	0.233947
chr6	16326624	16328701	ATXN1	.	16	7	26	0.941176	0.467895
chr6	87925620	87928449	ZNF292	.	11	16	8	0.88	0.321678
chr9	114148656	114154104	KIAA0368	.	10	61	116	0.11236	0.292434
chr21	10985044	10998335	.	.	19	1	38	0.95	0.555625
chr20	57014000	57016139	VAPB	.	25	9	39	1.02041	0.731086
chr1	151139409	151139890	TNFAIP8L2	.	15	126	420	0.0548446	0.438651
chr10	91511102	91522592	KIF20B	.	10	144	34	0.111732	0.292434
chr4	1918597	1920350	WHSC1	.	57	1732	1163	0.0393646	1.66688
chr3	157839891	157841780	RSRC1	.	33	79	211	0.226804	0.965033
chr17	45479497	45492285	EFCAB13	.	5	13	1	0.666667	0.146217
chr3	171969049	172028671	FNDC3B	.	18	877	83	0.037461	0.526382
chr21	11038727	11058323	BAGE5	.	12	24	9	0.705882	0.350921
chr8	109462051	109462721	EMC2	.	24	514	178	0.0692641	0.701842
chr1	58971731	59004982	OMA1	.	10	70	8	0.253165	0.292434
chr10	7285519	7327916	SFMBT2	.	0	0	0	0	0
chr15	41988272	41991357	MGA	.	12	57	13	0.338028	0.350921
chr3	56600621	56601081	CCDC66	.	8	65	35	0.158416	0.233947
chr6	77981056	77983024	.	.	7	0	1	7	0.204704
chr7	155465560	155473602	RBM33	.	21	38	65	0.403846	0.614112
chr12	116668337	116675510	MED13L	.	8	7	24	0.5	0.233947
chr17	65941524	65972074	BPTF	.	10	28	10	0.512821	0.292434
chr20	30954186	30956926	ASXL1	.	7	34	18	0.264151	0.204704
chr20	43600718	43615937	STK4	.	4	39	38	0.102564	0.116974
chr11	95546095	95546753	CEP57	.	6	509	143	0.0183767	0.175461
chr9	33971648	33973235	UBAP2	.	12	43	2	0.521739	0.350921
chr8	103372298	103373854	UBR5	.	6	30	46	0.155844	0.175461
chr1	155408117	155429689	ASH1L	.	17	11	123	0.251852	0.497138
chr4	178274461	178274882	NEIL3	.	14	15	19	0.8	0.409408
chr12	69210591	69222711	MDM2	.	37	514	3530	0.0182942	1.08201
chr3	169863210	169867032	PHC3	.	10	61	55	0.17094	0.292434
chr8	61653817	61655656	CHD7	.	22	16	47	0.6875	0.643355
chr8	109462051	109468159	EMC2	.	16	514	134	0.0493066	0.467895
chr19	33604672	33605325	GPATCH1	.	6	22	10	0.363636	0.175461
chr5	167915606	167921655	RARS	.	8	140	125	0.0601504	0.233947
chr10	126631025	126631876	ZRANB1	.	13	13	18	0.8125	0.380165
chr9	33953282	33963789	UBAP2	.	6	14	41	0.214286	0.175461
chr4	153332454	153391140	FBXW7	.	0	0	0	0	0
chrX	139865339	139866824	.	CDR1	12	0	0	24	0.350921
chr4	56277780	56284152	TMEM165	.	20	52	394	0.0894855	0.584868
chr10	5815804	5842668	GDI2	.	24	578	639	0.0394089	0.701842
chr13	96409897	96416207	DNAJC3	.	9	132	455	0.0306122	0.263191
chr8	98698895	98703416	MTDH	.	11	8865	1382	0.00214676	0.321678
chr3	17051165	17056403	PLCL2	.	16	26	32	0.542373	0.467895
chr19	8520288	8528570	HNRNPM	.	14	185	58	0.114754	0.409408
chr11	120916382	120930794	TBCEL	.	5	39	38	0.128205	0.146217
chr1	146724277	146731572	CHD1L	.	8	47	16	0.25	0.233947
chr15	41961025	41962156	MGA	.	6	19	42	0.193548	0.175461
chr10	15875628	15889942	FAM188A	.	19	40	12	0.716981	0.555625
chr12	124071293	124074996	TMED2	.	20	833	1839	0.0149645	0.584868
chr14	39648294	39648666	PNN	.	0	0	0	0	0
chr15	87949593	87966067	.	.	15	25	6	0.9375	0.438651
chr20	33065576	33067594	ITCH	.	2	266	25	0.0136986	0.0584868
chr4	39739039	39776553	UBE2K	.	9	139	75	0.0837209	0.263191
chr17	37933903	37934263	IKZF3	.	10	57	0	0.344828	0.292434
chr3	50102463	50103935	RBM6	.	6	60	104	0.0727273	0.175461
chr12	46622935	46637097	SLC38A1	.	12	191	180	0.0645161	0.350921
chr12	120592773	120593523	GCN1	.	15	94	88	0.163934	0.438651
chr1	31465236	31468067	PUM1	.	14	4	173	0.157303	0.409408
chr11	72695132	72700142	FCHSD2	.	3	19	39	0.101695	0.0877303
chr5	41794104	41807540	OXCT1	.	13	160	153	0.0828025	0.380165
chr10	28872327	28884970	WAC	.	9	78	211	0.062069	0.263191
chr18	8718421	8720494	MTCL1	.	8	7	17	0.64	0.233947
chr12	69222550	69230529	MDM2	.	2	634	272	0.00441014	0.0584868
chr7	128655032	128658211	TNPO3	.	9	21	32	0.333333	0.263191
chr17	57808781	57816308	VMP1	.	8	134	133	0.0597015	0.233947
chr16	68155889	68157024	NFATC3	.	18	3	31	1.02857	0.526382
chr5	68470703	68471364	CCNB1	.	15	193	87	0.106762	0.438651
chr10	7318853	7327916	SFMBT2	.	0	0	0	0	0
chr7	99090662	99092254	ZNF394	.	8	2	26	0.551724	0.233947
chr1	155691307	155695810	DAP3	.	11	318	95	0.0531401	0.321678
chr4	48371865	48385801	SLAIN2	.	17	17	23	0.829268	0.497138
chr3	171969049	172016577	FNDC3B	.	13	877	895	0.0146644	0.380165
chr18	44526019	44526886	.	.	14	11	0	2.33333	0.409408
chr11	108098321	108100050	ATM	.	11	90	51	0.15493	0.321678
chr10	102683731	102685776	SLF2	.	11	47	75	0.178862	0.321678
chr12	69644908	69656342	CPSF6	.	8	132	35	0.0952381	0.233947
chr5	6737622	6746540	PAPD7	.	6	17	22	0.3	0.175461
chr6	158733082	158735300	TULP4	.	27	22	4	2	0.789572
chr10	5827104	5842668	GDI2	.	0	0	0	0	0
chr5	60768507	60768864	ZSWIM6	.	4	9	25	0.228571	0.116974
chr10	105382226	105420872	SH3PXD2A	.	20	23	2	1.53846	0.584868
chr5	109049220	109051965	MAN2A1	.	9	56	75	0.136364	0.263191
chr8	22332466	22333137	PPP3CC	.	9	375	49	0.0423529	0.263191
chr21	46548316	46554747	ADARB1	.	9	20	46	0.268657	0.263191
chr5	137320945	137324004	FAM13B	.	4	24	4	0.275862	0.116974
chr18	19345732	19399607	MIB1	.	7	91	45	0.10219	0.204704
chr1	28907071	28907741	SNHG12	.	5	26	23	0.2	0.146217
chr8	28013458	28019595	ELP3	.	0	0	0	0	0
chr1	1601102	1666274	CDK11B	MMP23A	0	0	0	0	0
chr12	46319924	46322642	SCAF11	.	3	58	32	0.0659341	0.0877303
chr22	22160138	22162135	MAPK1	.	34	46	49	0.708333	0.994276
chr14	99924615	99932150	SETD3	.	7	16	6	0.608696	0.204704
chrX	134679347	134690225	INTS6L	.	12	46	29	0.315789	0.350921
chr20	60714130	60716000	PSMA7	.	11	149	281	0.0510441	0.321678
chr18	9204473	9221997	ANKRD12	.	8	65	4	0.228571	0.233947
chr7	24659670	24708279	MPP6	.	15	0	79	0.375	0.438651
chr21	30693541	30702014	BACH1	.	13	8	76	0.305882	0.380165
chrX	149962163	149984551	CD99L2	.	9	12	218	0.0779221	0.263191
chr2	240929490	240946787	NDUFA10	.	15	64	100	0.181818	0.438651
chr16	3900297	3901010	CREBBP	.	3	4	15	0.3	0.0877303
chr15	87898779	87966067	.	.	10	8	6	1.33333	0.292434
chr8	98731276	98735263	MTDH	.	24	2459	15746	0.00263649	0.701842
chr14	81209418	81227957	CEP128	.	8	15	260	0.057971	0.233947
chr20	46365446	46386207	SULF2	.	9	98	187	0.0629371	0.263191
chr1	8601272	8617582	RERE	.	4	5	0	1.33333	0.116974
chr11	108137897	108138069	ATM	.	2	66	24	0.043956	0.0584868
chr3	196118683	196129890	UBXN7	.	5	22	9	0.3125	0.146217
chr14	23375403	23380612	RBM23	.	3	22	210	0.0257511	0.0877303
chr13	49742748	49752790	FNDC3A	.	5	224	175	0.025	0.146217
chr1	231500072	231503382	EGLN1	.	0	0	0	0	0
chr4	73956383	73958017	ANKRD17	.	19	28	0	1.31034	0.555625
chr1	41536266	41541123	SCMH1	.	13	25	5	0.83871	0.380165
chr1	28362054	28384605	EYA3	.	13	112	286	0.0651629	0.380165
chr19	34921480	34929671	UBA2	.	14	195	37	0.120172	0.409408
chr7	24663284	24708279	MPP6	.	15	8	79	0.340909	0.438651
chr2	172782046	172809519	HAT1	.	13	147	45	0.134715	0.380165
chr21	17135209	17138460	USP25	.	16	21	29	0.627451	0.467895
chr1	21083658	21100103	HP1BP3	.	8	20	178	0.080402	0.233947
chr7	151944986	151970952	KMT2C	.	0	0	0	0	0
chr4	129913321	129925031	SCLT1	.	7	47	6	0.259259	0.204704
chr20	30115286	30115853	HM13	.	3	281	0	0.0212766	0.0877303
chr2	231307651	231314970	SP100	.	6	64	13	0.153846	0.175461
chr11	118454523	118455359	ARCN1	.	4	1175	1076	0.0035524	0.116974
chr10	116879948	116889297	ATRNL1	.	21	14	22	1.13514	0.614112
chr9	88920106	88924932	ZCCHC6	.	6	43	48	0.130435	0.175461
chr1	35824525	35827390	ZMYM4	.	13	8	37	0.565217	0.380165
chr15	81262802	81274523	MESDC2	.	14	2	474	0.0587002	0.409408
chr7	148716083	148718239	PDIA4	.	11	305	1375	0.0130874	0.321678
chr4	1919867	1920350	WHSC1	.	9	2129	1163	0.00546614	0.263191
chr7	23015828	23023664	FAM126A	.	0	0	0	0	0
chr1	58971731	59002413	OMA1	.	6	70	45	0.103448	0.175461
chr1	115005725	115007010	TRIM33	.	10	12	32	0.444444	0.292434
chr16	4311779	4312702	TFAP4	.	7	5	97	0.135922	0.204704
chr6	24416624	24418806	MRS2	.	3	105	63	0.035503	0.0877303
chr1	247319707	247323115	ZNF124	.	7	0	0	14	0.204704
chr15	41648236	41669502	NUSAP1	.	10	175	463	0.0312989	0.292434
chr15	63988322	64008672	HERC1	.	10	22	17	0.5	0.292434
chr22	21288066	21288532	CRKL	.	2	23	183	0.0193237	0.0584868
chr18	48444479	48450582	ME2	.	7	959	310	0.0110236	0.204704
chr2	203419974	203421254	BMPR2	.	6	55	16	0.166667	0.175461
chr18	42281139	42339068	SETBP1	.	2	7	5	0.307692	0.0584868
chr20	33057852	33069011	ITCH	.	2	137	159	0.013468	0.0584868
chr6	117010482	117026323	KPNA5	.	5	26	2	0.344828	0.146217
chr7	158552176	158557544	ESYT2	.	4	71	33	0.0761905	0.116974
chr14	53464387	53510473	.	.	0	0	0	0	0
chr8	99718694	99719539	STK3	.	0	0	0	0	0
chr20	34317233	34320057	RBM39	.	20	68	649	0.0557103	0.584868
chr12	112371689	112381173	TMEM116	.	12	6	42	0.489796	0.350921
chr18	42281139	42281797	SETBP1	.	12	7	43	0.470588	0.350921
chr5	138699447	138700432	PAIP2	.	10	111	408	0.0384615	0.292434
chr11	120907213	120930794	TBCEL	.	13	16	38	0.472727	0.380165
chr2	72958135	72960247	EXOC6B	.	5	36	33	0.142857	0.146217
chr3	31617887	31641951	STT3B	.	10	255	167	0.0472813	0.292434
chr18	33606862	33613800	RPRD1A	.	9	164	89	0.0708661	0.263191
chr18	45391429	45423180	SMAD2	.	5	9	66	0.131579	0.146217
chr11	76174864	76183884	EMSY	.	7	75	26	0.137255	0.204704
chr1	65830317	65831879	DNAJC6	.	0	0	0	0	0
chr2	122260742	122287901	CLASP1	.	6	1	45	0.255319	0.175461
chr2	173423435	173431661	PDK1	.	0	0	0	0	0
chr19	19750893	19751380	GMIP	.	13	136	10	0.176871	0.380165
chr18	60206913	60217693	ZCCHC2	.	8	5	29	0.457143	0.233947
chr8	27151596	27151827	TRIM35	.	10	0	99	0.2	0.292434
chrX	134679347	134683730	INTS6L	.	6	46	110	0.0764331	0.175461
chr4	2951660	2952972	NOP14	NOP14-AS1	10	246	199	0.044843	0.292434
chr7	40027197	40027857	CDK13	.	3	9	55	0.0923077	0.0877303
chr10	105197771	105198565	PDCD11	.	4	55	102	0.0506329	0.116974
chr7	99952765	99953427	STAG3L5P-PVRIG2P-PILRB	.	4	17	0	0.444444	0.116974
chr20	36685933	36694658	RPRD1B	.	8	30	5	0.444444	0.233947
chr20	34309661	34313077	RBM39	.	2	73	70	0.0277778	0.0584868
chrX	19983161	19988416	CXorf23	.	6	5	0	2	0.175461
chr9	6420911	6434173	UHRF2	.	0	0	0	0	0
chrX	48024315	48123352	.	SSX5	0	0	0	0	0
chr6	7181356	7189555	RREB1	.	6	115	8	0.0967742	0.175461
chr18	55278868	55283207	NARS	.	8	146	1598	0.00916905	0.233947
chr15	77657504	77681144	PEAK1	.	3	6	0	0.857143	0.0877303
chr2	136620176	136622733	MCM6	.	6	45	127	0.0693642	0.175461
chr19	5047486	5082515	KDM4B	.	0	0	0	0	0
chr4	76573822	76581054	G3BP2	.	6	242	104	0.0345821	0.175461
chr12	69983264	69985939	CCT2	.	3	379	708	0.00551471	0.0877303
chr5	32268806	32276848	MTMR12	.	5	21	109	0.0763359	0.146217
chr17	4186092	4200109	UBE2G1	.	5	40	115	0.0641026	0.146217
chr1	21295966	21329301	EIF4G3	.	9	49	182	0.0775862	0.263191
chr6	5404774	5431405	FARS2	.	0	0	0	0	0
chr4	17816475	17816981	NCAPG	.	4	37	12	0.16	0.116974
chr3	98487273	98492827	ST3GAL6	.	0	0	0	0	0
chr6	76344422	76388643	SENP6	.	5	10	202	0.0469484	0.146217
chr6	44971389	44988369	SUPT3H	.	0	0	0	0	0
chr11	118656760	118657227	DDX6	.	8	21	22	0.363636	0.233947
chr10	22193450	22209892	DNAJC1	.	6	1484	96	0.00759013	0.175461
chr5	32135677	32143986	GOLPH3	.	4	260	364	0.0128	0.116974
chr6	7899808	7904956	BLOC1S5-TXNDC5	.	12	2547	7291	0.00243927	0.350921
chr22	50810448	50832564	PPP6R2	.	5	13	42	0.178571	0.146217
chr1	84376847	84412965	LOC101927587	.	3	54	12	0.0895522	0.0877303
chr5	65349233	65350779	ERBIN	.	15	77	27	0.285714	0.438651
chr10	112356155	112358048	SMC3	.	4	153	78	0.0344828	0.116974
chr4	39915230	39927553	PDS5A	.	6	35	118	0.0779221	0.175461
chr12	69214104	69218431	MDM2	.	10	529	630	0.0172414	0.292434
chr6	13579682	13584457	SIRT5	.	5	4	3	1.25	0.146217
chr11	73418464	73429763	RAB6A	.	10	83	24	0.185185	0.292434
chr2	58449076	58459247	FANCL	.	7	10	12	0.608696	0.204704
chr5	118433673	118450236	DMXL1	.	3	74	24	0.0606061	0.0877303
chr14	31139461	31144271	SCFD1	.	6	62	51	0.105263	0.175461
chr5	80071512	80088663	MSH3	.	6	73	63	0.0875912	0.175461
chr1	22816372	22818026	ZBTB40	.	11	33	16	0.44	0.321678
chr10	22193450	22218070	DNAJC1	.	6	1484	191	0.0071599	0.175461
chr21	30698379	30702014	BACH1	.	5	29	76	0.0943396	0.146217
chr17	40650941	40653322	ATP6V0A1	.	2	28	29	0.0689655	0.0584868
chr3	142455220	142467302	TRPC1	.	2	8	5	0.285714	0.0584868
chr3	171969049	172025291	FNDC3B	.	6	877	93	0.0123584	0.175461
chr18	48450467	48466756	ME2	.	9	1036	687	0.0104408	0.263191
chr9	20819794	20823114	FOCAD	.	3	33	44	0.0769231	0.0877303
chr8	42812236	42819617	HOOK3	.	0	0	0	0	0
chr2	45773870	45789895	SRBD1	.	0	0	0	0	0
chr2	215609790	215646233	BARD1	.	3	35	56	0.0652174	0.0877303
chr3	123649948	123667979	CCDC14	.	0	0	0	0	0
chr6	109215669	109225608	ARMC2	.	3	31	27	0.101695	0.0877303
chr6	10703637	10705077	PAK1IP1	.	9	50	11	0.290323	0.263191
chr7	72873865	72884813	BAZ1B	.	5	31	131	0.0613497	0.146217
chr16	87782278	87795646	KLHDC4	.	3	26	7	0.176471	0.0877303
chr1	14099572	14109326	PRDM2	.	6	34	5	0.3	0.175461
chr17	62130139	62130731	ERN1	.	11	23	61	0.258824	0.321678
chr13	21742126	21742538	SKA3	.	4	9	5	0.533333	0.116974
chr14	53558502	53570574	DDHD1	.	0	0	0	0	0
chr7	152007050	152012423	KMT2C	.	0	0	0	0	0
chr1	1747194	1756938	GNB1	.	0	0	0	0	0
chr16	19627435	19628130	C16orf62	.	4	5	5	0.727273	0.116974
chr10	116590610	116608496	FAM160B1	.	0	0	0	0	0
chr7	104702610	104722244	KMT2E	.	2	62	34	0.0412371	0.0584868
chr7	129760588	129762042	KLHDC10	.	3	12	59	0.0833333	0.0877303
chr6	7904806	7904956	BLOC1S5-TXNDC5	.	0	0	0	0	0
chr5	93978977	93990457	SLF1	.	0	0	0	0	0
chr9	128099296	128099870	GAPVD1	.	0	0	0	0	0
chr10	125780771	125806240	CHST15	.	0	0	0	0	0
chr1	155490890	155491409	ASH1L	.	0	0	0	0	0
chr4	146744573	146770713	ZNF827	.	0	0	0	0	0
chr12	116674625	116675510	MED13L	.	0	0	0	0	0
chr6	7298155	7299056	SSR1	.	2	145	826	0.00411523	0.0584868
chr21	34614144	34635942	IFNAR2	.	0	0	0	0	0
chr16	58593707	58594266	CNOT1	.	0	0	0	0	0
chr4	36230203	36231267	ARAP2	.	0	0	0	0	0
chr1	154207066	154207767	UBAP2L	.	0	0	0	0	0
chr8	28304687	28309883	FBXO16	.	0	0	0	0	0
chr14	80963811	80997230	CEP128	.	5	1	50	0.192308	0.146217
chr17	20107645	20109225	SPECC1	.	9	7	13	0.857143	0.263191
chr8	107691437	107696587	OXR1	.	11	362	1202	0.0140575	0.321678
chr12	46633461	46637097	SLC38A1	.	7	159	180	0.0411765	0.204704
chr18	54423813	54426184	WDR7	.	16	39	11	0.627451	0.467895
chr2	190656515	190682906	PMS1	.	12	35	10	0.521739	0.350921
chr10	125798030	125806240	CHST15	.	10	28	71	0.2	0.292434
chr5	102432244	102433485	GIN1	.	10	15	85	0.19802	0.292434
chr9	138741982	138758382	CAMSAP1	.	11	19	96	0.189655	0.321678
chr1	155896466	155896947	KIAA0907	.	7	159	187	0.0403458	0.204704
chr11	108098321	108138069	ATM	.	4	90	24	0.0695652	0.116974
chr12	124904502	124915333	NCOR2	.	11	5	30	0.611111	0.321678
chr20	33057852	33080402	ITCH	.	8	137	163	0.0531561	0.233947
chr4	75040222	75091111	MTHFD2L	.	4	3	5	0.888889	0.116974
chr12	70193988	70195501	RAB3IP	.	5	18	7	0.384615	0.146217
chr20	35812582	35812776	RPN2	.	8	352	368	0.0221914	0.233947
chr10	112723882	112745523	SHOC2	.	7	10	154	0.0848485	0.204704
chr1	70758070	70781249	ANKRD13C	.	4	34	16	0.156863	0.116974
chr1	67423741	67428843	MIER1	.	8	53	22	0.210526	0.233947
chr7	87593948	87607727	ADAM22	.	0	0	0	0	0
chr5	179136873	179147561	CANX	.	7	2523	554	0.00454841	0.204704
chr1	161071837	161072165	PFDN2	.	10	445	147	0.0337268	0.292434
chr20	45891031	45905539	ZMYND8	.	8	131	55	0.0855615	0.233947
chr18	53763305	53764426	.	LINC01539	3	7	0	0.75	0.0877303
chrX	149983334	149984551	CD99L2	.	6	131	218	0.0342857	0.175461
chr2	200245086	200298237	SATB2	.	6	54	8	0.190476	0.175461
chr2	239090705	239093928	ILKAP	.	0	0	0	0	0
chr15	63824845	63855207	USP3	.	9	33	3	0.486486	0.263191
chr8	42780699	42798588	HOOK3	.	5	307	17	0.0307692	0.146217
chr11	8474368	8486369	STK33	.	4	20	86	0.0747664	0.116974
chr11	120347369	120348235	ARHGEF12	.	4	0	195	0.0408163	0.116974
chr5	65284462	65290692	ERBIN	.	5	48	14	0.15873	0.146217
chr16	69404385	69406258	TERF2	.	7	23	2	0.538462	0.204704
chr6	74190397	74191967	MTO1	.	4	148	32	0.0441989	0.116974
chr10	31661946	31676195	ZEB1	.	2	5	27	0.121212	0.0584868
chr2	215632205	215646233	BARD1	.	3	2	56	0.101695	0.0877303
chr1	205585605	205593019	ELK4	.	0	0	0	0	0
chr16	18846213	18856973	SMG1	.	4	9	57	0.119403	0.116974
chr15	85223943	85234875	SEC11A	.	3	73	139	0.028169	0.0877303
chr9	103082546	103111654	TEX10	.	5	1	36	0.263158	0.146217
chr7	33185853	33217203	BBS9	.	3	2	3	1	0.0877303
chr6	10702601	10702872	PAK1IP1	.	0	0	0	0	0
chr16	48587449	48596355	N4BP1	MIR548AE2	3	4	13	0.333333	0.0877303
chr5	113740134	113740553	KCNN2	.	3	0	1	3	0.0877303
chr17	80521229	80529746	FOXK2	.	5	44	17	0.16129	0.146217
chr16	70598967	70601439	SF3B3	.	0	0	0	0	0
chrX	90669902	90673870	PABPC5-AS1	.	6	1	0	6	0.175461
chr6	13632601	13644961	RANBP9	NOL7	2	8	0	0.444444	0.0584868
chr12	1372199	1399178	ERC1	.	13	331	28	0.0722222	0.380165
chr11	32611092	32617593	EIF3M	.	0	0	0	0	0
chr12	80187642	80215970	PPP1R12A	.	5	0	205	0.0485437	0.146217
chr5	178312614	178358327	ZFP2	.	0	0	0	0	0
chr8	124349864	124351686	ATAD2	.	8	82	42	0.128	0.233947
chr4	103225473	103236987	SLC39A8	.	0	0	0	0	0
chr19	5653125	5654467	SAFB	.	3	71	77	0.0402685	0.0877303
chr17	40652724	40653322	ATP6V0A1	.	0	0	0	0	0
chr9	88211276	88248289	AGTPBP1	.	0	0	0	0	0
chr8	22899553	22900756	TNFRSF10B	.	2	1	49	0.0784314	0.0584868
chr20	42331129	42331543	MYBL2	.	0	0	0	0	0
chr3	185638891	185641772	TRA2B	.	0	0	0	0	0
chr6	52132662	52134024	MCM3	.	0	0	0	0	0
chr1	220179447	220180680	EPRS	RNU5F-1	0	0	0	0	0
chr3	28051960	28070094	.	.	0	0	0	0	0
chr1	35846859	35847359	ZMYM4	.	0	0	0	0	0
chr9	22046749	22097363	CDKN2B-AS1	.	0	0	0	0	0
chr5	179136873	179143295	CANX	.	2	2523	4085	0.000605235	0.0584868
chr11	77409531	77413540	RSF1	.	4	5	66	0.111111	0.116974
chr3	141228409	141248644	RASA2	.	2	8	22	0.129032	0.0584868
chr15	101104896	101105470	.	.	2	0	0	4	0.0584868
chrX	54013510	54014377	PHF8	.	0	0	0	0	0
chr7	127344892	127361454	SND1	.	0	0	0	0	0
chr11	85707868	85742653	PICALM	.	0	0	0	0	0
chr1	154197559	154209612	UBAP2L	.	0	0	0	0	0
chr12	1213915	1250953	ERC1	.	0	0	0	0	0
chr5	171482591	171484477	STK10	.	0	0	0	0	0
chr18	9182379	9216898	ANKRD12	.	0	0	0	0	0
chr7	91924202	91948826	ANKIB1	.	0	0	0	0	0
chr12	121858044	121861320	RNF34	.	0	0	0	0	0
chr1	176524542	176526377	PAPPA2	.	0	0	0	0	0
chr8	68005777	68024300	CSPP1	.	0	0	0	0	0
chr11	68334481	68343511	PPP6R3	.	0	0	0	0	0
chr17	40880842	40882936	EZH1	.	0	0	0	0	0
chr15	72283443	72302788	MYO9A	.	0	0	0	0	0
chr6	109232101	109258202	ARMC2	ARMC2-AS1	6	23	148	0.0697674	0.175461
chr10	5741487	5756170	FAM208B	.	9	0	28	0.62069	0.263191
chrX	44383247	44386611	FUNDC1	.	13	0	79	0.325	0.380165
chr1	52959282	52975384	ZCCHC11	.	3	52	38	0.0659341	0.0877303
chr6	92045595	92047935	.	.	10	1	0	10	0.292434
chr22	28910744	28915308	TTC28	.	3	0	1	3	0.0877303
chr10	15858833	15889942	FAM188A	.	3	21	12	0.176471	0.0877303
chr8	68044185	68049838	CSPP1	.	12	28	46	0.32	0.350921
chrX	133607388	133627620	HPRT1	.	6	18	12	0.387097	0.175461
chr5	176370335	176385155	UIMC1	.	0	0	0	0	0
chr10	22171210	22209892	DNAJC1	.	0	0	0	0	0
chr9	33948371	33953472	UBAP2	.	7	70	21	0.152174	0.204704
chr8	142264087	142264728	SLC45A4	LOC105375787	3	0	3	1.5	0.0877303
chr1	187272597	187298192	LINC01036	.	13	4	9	1.85714	0.380165
chr14	31416295	31425448	STRN3	.	9	151	82	0.0769231	0.263191
chr19	58772216	58775042	ZNF544	.	11	9	0	2.2	0.321678
chr12	69218142	69222711	MDM2	.	6	1390	3530	0.00243853	0.175461
chr14	81223235	81244390	CEP128	.	11	85	55	0.156028	0.321678
chr20	34300940	34313077	RBM39	.	0	0	0	0	0
chr1	51032748	51061888	FAF1	.	8	66	90	0.101911	0.233947
chr9	103261046	103279053	MSANTD3	.	9	21	16	0.473684	0.263191
chr9	37126308	37147442	ZCCHC7	.	7	30	0	0.451613	0.204704
chr2	200213423	200298237	SATB2	.	3	11	8	0.3	0.0877303
chr4	54280781	54294350	FIP1L1	.	5	20	37	0.172414	0.146217
chr3	169889160	169896726	PHC3	.	10	70	11	0.243902	0.292434
chr7	127013395	127017383	ZNF800	.	3	2	28	0.193548	0.0877303
chr21	37711076	37717005	MORC3	.	5	0	22	0.434783	0.146217
chr20	43607083	43615937	STK4	.	4	92	38	0.0610687	0.116974
chrX	135323318	135326954	MAP7D3	.	5	77	409	0.0205339	0.146217
chr20	47570092	47580435	ARFGEF2	.	7	320	21	0.0409357	0.204704
chr15	89656955	89659752	ABHD2	.	4	84	101	0.0430108	0.116974
chr15	49528047	49531564	GALK2	.	7	49	55	0.133333	0.204704
chr20	47691321	47707559	CSE1L	.	0	0	0	0	0
chr11	116627861	116629123	BUD13	.	0	0	0	0	0
chr17	35310185	35311207	AATF	.	2	122	40	0.0245399	0.0584868
chr13	96636057	96651561	UGGT2	.	3	22	1	0.25	0.0877303
chr19	24014398	24017206	.	.	0	0	0	0	0
chr8	48866179	48869991	PRKDC	.	7	51	29	0.17284	0.204704
chr11	117150623	117150975	RNF214	.	7	105	20	0.111111	0.204704
chr17	46189392	46190763	SNX11	.	3	4	3	0.75	0.0877303
chr3	47651555	47719801	SMARCC1	.	0	0	0	0	0
chr15	93543741	93558139	CHD2	.	4	9	15	0.32	0.116974
chr1	174241551	174274265	RABGAP1L	.	3	315	54	0.0162162	0.0877303
chrX	79962925	79975155	BRWD3	.	6	74	43	0.101695	0.175461
chr5	70798425	70808255	BDP1	.	3	33	65	0.0606061	0.0877303
chr4	178274461	178281831	NEIL3	.	6	15	0	0.75	0.175461
chr12	32480394	32481489	BICD1	.	2	4	2	0.571429	0.0584868
chr10	32740519	32762951	CCDC7	.	3	11	6	0.333333	0.0877303
chr10	70404454	70406762	TET1	.	0	0	0	0	0
chr5	14673750	14693203	OTULIN	.	3	0	0	6	0.0877303
chr2	61118817	61149134	REL	.	4	137	0	0.057971	0.116974
chr6	20546576	20548936	CDKAL1	.	4	16	74	0.0879121	0.116974
chr1	162535801	162567648	UAP1	.	2	1690	209	0.00210526	0.0584868
chr1	1747194	1770677	GNB1	.	0	0	0	0	0
chr20	62407030	62422143	ZBTB46	.	3	1	0	3	0.0877303
chr10	12123470	12162266	DHTKD1	.	0	0	0	0	0
chr9	96233422	96261168	FAM120A	.	0	0	0	0	0
chr7	23224688	23226765	NUPL2	.	2	102	36	0.028777	0.0584868
chr7	104714065	104717880	KMT2E	.	2	92	16	0.0366972	0.0584868
chr15	73064123	73067438	ADPGK	.	0	0	0	0	0
chr1	21295966	21307720	EIF4G3	.	7	49	83	0.105263	0.204704
chr7	117825700	117828459	LSM8	.	2	0	139	0.0285714	0.0584868
chr5	132227855	132228810	AFF4	.	0	0	0	0	0
chr2	70451685	70457986	TIA1	.	0	0	0	0	0
chr17	7402357	7402810	POLR2A	.	0	0	0	0	0
chr14	81405728	81408724	.	.	3	56	2	0.101695	0.0877303
chr16	12060051	12061700	TNFRSF17	.	0	0	0	0	0
chr7	156956503	156963144	UBE3C	.	2	89	123	0.0187793	0.0584868
chr4	83795763	83803093	SEC31A	.	0	0	0	0	0
chr1	168007608	168037701	DCAF6	.	4	357	42	0.02	0.116974
chr11	34978930	35006275	PDHX	.	0	0	0	0	0
chr4	106367539	106377902	PPA2	.	2	349	116	0.00858369	0.0584868
chr18	48444479	48458730	ME2	.	0	0	0	0	0
chr16	88008653	88017865	BANP	.	0	0	0	0	0
chr2	113057425	113089859	ZC3H6	.	0	0	0	0	0
chr2	48061717	48062010	FBXO11	.	0	0	0	0	0
chr10	14938844	14939516	SUV39H2	.	0	0	0	0	0
chr8	119388020	119391939	SAMD12	.	0	0	0	0	0
chr2	85270686	85276771	KCMF1	.	0	0	0	0	0
chr17	29483000	29497015	NF1	.	0	0	0	0	0
chr14	61275042	61346553	MNAT1	.	0	0	0	0	0
chr14	58785259	58796887	ARID4A	.	0	0	0	0	0
chr13	35883664	35926460	NBEA	.	0	0	0	0	0
chr11	118997644	118997835	HINFP	.	0	0	0	0	0
chr9	78682870	78722267	PCSK5	.	0	0	0	0	0
chr10	27431315	27434519	YME1L1	.	0	0	0	0	0
chr1	213037066	213058738	FLVCR1	.	0	0	0	0	0
chr20	49551566	49571822	DPM1	ADNP-AS1	0	0	0	0	0
chr1	97235258	97250810	PTBP2	.	0	0	0	0	0
chr15	93543741	93552553	CHD2	.	5	9	23	0.30303	0.146217
chr4	10099334	10105610	WDR1	.	0	0	0	0	0
chr17	4186092	4210418	UBE2G1	.	0	0	0	0	0
chr8	98698895	98735263	MTDH	.	0	0	0	0	0
chr12	51173922	51203372	ATF1	.	0	0	0	0	0
chr3	171944660	171969331	FNDC3B	.	0	0	0	0	0
chr7	102957276	102960125	DNAJC2	.	0	0	0	0	0
chr6	130631011	130706381	.	SAMD3	0	0	0	0	0
chr22	29193064	29195141	XBP1	.	0	0	0	0	0
chr21	47768925	47769734	PCNT	.	0	0	0	0	0
chr8	48003023	48045390	.	.	0	0	0	0	0
chr5	41794104	41801172	OXCT1	.	0	0	0	0	0
chr2	209045468	209051785	C2orf80	.	0	0	0	0	0
chr15	43067332	43109295	TTBK2	.	0	0	0	0	0
chr3	125032151	125050082	ZNF148	.	13	16	267	0.0915493	0.380165
chr11	34093272	34098189	CAPRIN1	.	4	75	420	0.016129	0.116974
chr1	52981562	52992045	ZCCHC11	.	8	38	28	0.238806	0.233947
chrX	53672262	53681075	HUWE1	.	14	78	182	0.10728	0.409408
chr2	122363276	122363756	CLASP1	.	11	46	53	0.22	0.321678
chr2	136432901	136437894	R3HDM1	.	11	236	76	0.0702875	0.321678
chr11	8435041	8486369	STK33	.	18	14	86	0.356436	0.526382
chr2	191765289	191789319	GLS	.	0	0	0	0	0
chr17	60061531	60062451	MED13	.	5	9	31	0.243902	0.146217
chr9	127670655	127674305	GOLGA1	.	8	2	72	0.213333	0.233947
chr8	128902834	128903244	PVT1	.	4	9	4	0.571429	0.116974
chr6	87920168	87928449	ZNF292	.	7	0	8	1.55556	0.204704
chr2	64778576	64780543	AFTPH	.	3	59	20	0.075	0.0877303
chr6	158703294	158735300	.	.	0	0	0	0	0
chr7	38050522	38053183	.	.	12	1	1	8	0.350921
chr12	116668237	116675510	MED13L	.	2	0	24	0.16	0.0584868
chr18	13048857	13059311	CEP192	.	10	105	0	0.188679	0.292434
chr7	23650789	23651172	CCDC126	.	0	0	0	0	0
chr18	51804072	51813781	POLI	.	5	53	3	0.175439	0.146217
chr18	13048857	13073184	CEP192	.	7	105	12	0.118644	0.204704
chr11	8457040	8486369	STK33	.	6	46	86	0.0902256	0.175461
chr21	34614144	34625135	IFNAR2	.	6	13	38	0.230769	0.175461
chr10	117221450	117228839	ATRNL1	.	9	27	2	0.6	0.263191
chr5	109152973	109159538	MAN2A1	.	4	120	216	0.0237389	0.116974
chr1	29068914	29070498	YTHDF2	.	5	39	1	0.243902	0.146217
chr1	151060665	151090615	GABPB2	.	3	84	0	0.0705882	0.0877303
chr8	71071739	71075089	NCOA2	.	3	36	6	0.139535	0.0877303
chr5	14673750	14681716	OTULIN	.	7	0	49	0.28	0.204704
chr8	68005777	68007967	CSPP1	.	7	157	36	0.0721649	0.204704
chr3	113207791	113225452	SPICE1	.	6	5	19	0.48	0.175461
chr12	1289705	1299218	ERC1	.	2	125	395	0.00767754	0.0584868
chr20	39721111	39729993	TOP1	PLCG1-AS1	0	0	0	0	0
chr9	33996220	34017187	UBAP2	.	7	102	12	0.121739	0.204704
chr1	224599128	224601037	WDR26	.	6	9	11	0.571429	0.175461
chr2	100078957	100081447	REV1	.	0	0	0	0	0
chr10	15875628	15885271	FAM188A	.	4	40	51	0.0869565	0.116974
chr8	37623043	37623873	PROSC	.	4	10	18	0.275862	0.116974
chr22	32874967	32881196	FBXO7	.	8	107	80	0.0851064	0.233947
chr6	42559888	42562042	UBR2	.	2	25	40	0.0606061	0.0584868
chr2	61749745	61761038	XPO1	.	2	54	31	0.0465116	0.0584868
chr12	69983264	69987393	CCT2	.	0	0	0	0	0
chr2	172782046	172844276	HAT1	.	3	147	734	0.00680272	0.0877303
chr2	62100136	62103369	CCT4	.	2	873	1033	0.00209754	0.0584868
chr7	24663284	24690331	MPP6	.	3	8	60	0.0869565	0.0877303
chr14	64065473	64066691	WDR89	.	0	0	0	0	0
chr13	33091993	33101669	N4BP2L2	.	6	8	14	0.521739	0.175461
chr14	50616725	50616948	SOS2	.	0	0	0	0	0
chr7	17908029	17915413	SNX13	.	5	42	65	0.0925926	0.146217
chr1	110203786	110233186	GSTM2	.	3	0	1	3	0.0877303
chr5	43675612	43704502	NNT	.	0	0	0	0	0
chr9	88284399	88327481	AGTPBP1	.	0	0	0	0	0
chr8	22332466	22370945	PPP3CC	.	0	0	0	0	0
chr9	37126308	37127260	ZCCHC7	.	4	30	0	0.258065	0.116974
chr17	57808781	57851246	VMP1	.	2	134	12	0.0272109	0.0584868
chr7	97820039	97823884	LMTK2	.	5	9	5	0.666667	0.146217
chr12	27867712	27877119	MRPS35	.	8	31	160	0.0833333	0.233947
chr14	81209418	81259454	CEP128	.	0	0	0	0	0
chr1	179972308	179975702	CEP350	.	0	0	0	0	0
chr2	111423839	111427130	BUB1	.	5	173	40	0.046729	0.146217
chr1	78267015	78280916	FAM73A	.	2	39	5	0.0888889	0.0584868
chr19	47767859	47768203	CCDC9	.	7	11	7	0.736842	0.204704
chr19	38631823	38633350	SIPA1L3	.	4	13	21	0.228571	0.116974
chr2	136467002	136467801	R3HDM1	.	3	77	30	0.0555556	0.0877303
chr9	123593608	123595734	PSMD5	.	4	17	6	0.333333	0.116974
chr1	172525008	172539870	SUCO	.	0	0	0	0	0
chr9	35295692	35313986	UNC13B	.	3	16	19	0.166667	0.0877303
chr11	94219089	94224131	MRE11A	.	13	23	128	0.171053	0.380165
chr6	17648037	17649531	NUP153	.	0	0	0	0	0
chr9	130106513	130107756	GARNL3	.	4	38	0	0.205128	0.116974
chr8	37971709	37976881	ASH2L	.	0	0	0	0	0
chr4	154315413	154318485	MND1	.	3	71	17	0.0674157	0.0877303
chr9	96233422	96238620	FAM120A	.	2	74	11	0.0465116	0.0584868
chr1	12335881	12338095	VPS13D	.	3	14	23	0.157895	0.0877303
chr18	12999419	13030607	CEP192	.	0	0	0	0	0
chr10	105767934	105778666	SLK	.	3	258	115	0.0160428	0.0877303
chr15	44620882	44673174	CASC4	.	0	0	0	0	0
chr9	77631183	77632364	CARNMT1	.	7	12	178	0.0732984	0.204704
chr4	113483526	113506881	ZGRF1	.	2	12	7	0.2	0.0584868
chr1	21076215	21100103	HP1BP3	.	0	0	0	0	0
chr3	52238708	52240767	ALAS1	.	4	36	6	0.186047	0.116974
chr11	95546095	95552068	CEP57	.	5	509	104	0.0162866	0.146217
chr20	34304661	34313077	RBM39	.	0	0	0	0	0
chr22	41568502	41569788	EP300	.	4	121	6	0.0625	0.116974
chr3	119219541	119232566	TIMMDC1	.	0	0	0	0	0
chr19	12825634	12826553	TNPO2	.	0	0	0	0	0
chr10	103552595	103570071	MGEA5	.	0	0	0	0	0
chr3	33725850	33731424	CLASP2	.	5	11	67	0.126582	0.146217
chr14	102661274	102676199	WDR20	.	4	14	0	0.533333	0.116974
chr2	69565029	69573131	GFPT1	.	7	74	396	0.029724	0.204704
chr8	38677039	38678153	TACC1	.	0	0	0	0	0
chr2	61710091	61717911	XPO1	.	0	0	0	0	0
chr15	50878588	50884823	TRPM7	.	3	35	26	0.0967742	0.0877303
chr9	33351557	33352717	NFX1	.	0	0	0	0	0
chrX	10031484	10066619	WWC3	.	2	17	10	0.142857	0.0584868
chr7	103801519	103808973	ORC5	.	6	12	129	0.084507	0.175461
chr6	7895338	7904956	BLOC1S5-TXNDC5	.	3	1385	7291	0.000691483	0.0877303
chr6	18160113	18166609	KDM1B	.	0	0	0	0	0
chr4	106345352	106377902	PPA2	.	0	0	0	0	0
chr1	35846859	35854683	ZMYM4	.	0	0	0	0	0
chr12	69229608	69230529	MDM2	.	2	3534	272	0.0010507	0.0584868
chr8	48955592	48962538	UBE2V2	.	2	45	84	0.0307692	0.0584868
chr3	49016914	49017929	ARIH2	.	0	0	0	0	0
chr2	17846769	17927218	SMC6	.	6	0	37	0.315789	0.175461
chr1	150997086	150998149	PRUNE	.	0	0	0	0	0
chr9	111819470	111826847	TMEM245	.	2	7	104	0.0357143	0.0584868
chr2	61505299	61508377	USP34	.	0	0	0	0	0
chr19	24015450	24015618	.	.	0	0	0	0	0
chr7	138951078	138957186	UBN2	.	0	0	0	0	0
chr21	38792600	38802702	DYRK1A	.	0	0	0	0	0
chr20	47691321	47706283	CSE1L	.	0	0	0	0	0
chr13	26974589	26975761	CDK8	.	4	9	22	0.25	0.116974
chr4	39739039	39779430	UBE2K	.	0	0	0	0	0
chr10	32308785	32310215	KIF5B	.	0	0	0	0	0
chrX	64295353	64295792	.	.	0	0	0	0	0
chr7	128845043	128846428	SMO	.	2	0	0	4	0.0584868
chr4	24572276	24578301	DHX15	.	0	0	0	0	0
chr5	118417268	118450236	DMXL1	.	0	0	0	0	0
chr3	152132729	152165562	MBNL1	.	4	373	22	0.020202	0.116974
chr22	25771779	25777545	LRP5L	.	0	0	0	0	0
chr18	56363597	56367823	MALT1	.	0	0	0	0	0
chr9	34241182	34242106	UBAP1	.	6	67	14	0.146341	0.175461
chr17	35931889	35945538	SYNRG	.	0	0	0	0	0
chr14	53622960	53656654	.	.	4	0	0	8	0.116974
chr2	128520635	128528578	WDR33	.	0	0	0	0	0
chr17	60038227	60040332	MED13	.	0	0	0	0	0
chr6	64389900	64395812	PHF3	.	0	0	0	0	0
chr3	183435438	183446639	YEATS2	.	0	0	0	0	0
chr20	34450934	34459751	PHF20	.	0	0	0	0	0
chr1	244582061	244583598	ADSS	.	0	0	0	0	0
chr11	102701462	102703637	WTAPP1	.	0	0	0	0	0
chr10	74790028	74828741	P4HA1	.	0	0	0	0	0
chr18	2775731	2784619	SMCHD1	.	0	0	0	0	0
chr16	69395306	69402385	TERF2	.	2	22	23	0.0869565	0.0584868
chr1	231079551	231097049	TTC13	.	0	0	0	0	0
chr9	88925620	88934585	ZCCHC6	.	0	0	0	0	0
chr9	271626	289581	DOCK8	.	0	0	0	0	0
chr20	6077548	6078278	FERMT1	.	0	0	0	0	0
chr1	110125058	110129504	GNAI3	.	0	0	0	0	0
chr1	155408117	155408859	ASH1L	.	12	11	7	1.26316	0.350921
chr18	12999419	13019205	CEP192	.	11	4	6	2	0.321678
chr18	48444479	48466756	ME2	.	3	959	687	0.00364299	0.0877303
chr2	48555699	48573890	FOXN2	.	10	18	18	0.540541	0.292434
chr1	45223227	45223812	KIF2C	.	12	89	34	0.193548	0.350921
chr16	47143393	47165936	NETO2	.	5	29	20	0.2	0.146217
chr5	56160560	56161804	MAP3K1	.	7	28	8	0.378378	0.204704
chr18	74561481	74563895	ZNF236	.	7	7	8	0.875	0.204704
chr11	32948702	32956981	QSER1	.	3	0	7	0.75	0.0877303
chr17	27613009	27614734	NUFIP2	.	5	43	222	0.037594	0.146217
chr2	99802639	99812219	MRPL30	.	5	65	3	0.144928	0.146217
chr3	43341245	43345284	SNRK	.	0	0	0	0	0
chr1	92798947	92846430	RPAP2	.	8	5	0	2.66667	0.233947
chr11	119002244	119003929	HINFP	.	6	45	23	0.173913	0.175461
chr10	32197099	32199491	ARHGAP12	.	0	0	0	0	0
chr1	9991948	9994918	LZIC	.	3	22	16	0.153846	0.0877303
chr16	70294946	70296427	AARS	.	10	204	195	0.05	0.292434
chr22	24698162	24709434	SPECC1L	.	11	19	81	0.217822	0.321678
chr11	108586605	108594189	DDX10	.	0	0	0	0	0
chr3	138289159	138291774	CEP70	.	8	55	12	0.235294	0.233947
chr11	70200406	70202360	PPFIA1	.	2	18	17	0.111111	0.0584868
chr15	67524151	67529158	AAGAB	.	3	65	4	0.0857143	0.0877303
chr10	126628942	126631876	.	.	2	8	18	0.148148	0.0584868
chr6	108243000	108250718	SEC63	.	4	18	41	0.133333	0.116974
chr3	196817782	196846401	DLG1	.	4	242	61	0.0263158	0.116974
chr17	35640167	35646430	ACACA	.	6	10	9	0.6	0.175461
chr3	141228409	141259451	RASA2	.	9	8	26	0.514286	0.263191
chr3	52771601	52775515	NEK4	.	5	26	21	0.208333	0.146217
chr2	173435453	173460751	PDK1	.	8	245	16	0.0610687	0.233947
chr2	135010665	135012215	.	.	2	6	43	0.08	0.0584868
chr15	93467550	93472321	CHD2	.	4	49	101	0.0529801	0.116974
chr10	7409610	7412337	SFMBT2	.	13	17	64	0.317073	0.380165
chr9	98740342	98766983	ERCC6L2	.	3	15	17	0.181818	0.0877303
chr8	101299728	101300495	RNF19A	.	4	127	47	0.0457143	0.116974
chr8	42819453	42873637	HOOK3	.	5	174	0	0.0571429	0.146217
chr4	106613132	106614643	INTS12	.	6	43	111	0.0774194	0.175461
chr2	190593385	190609514	ANKAR	.	9	4	0	3.6	0.263191
chr6	161455290	161471011	MAP3K4	.	4	5	15	0.380952	0.116974
chr6	90052042	90053475	UBE2J1	.	3	1035	764	0.00333333	0.0877303
chr6	87925620	87943245	ZNF292	.	3	16	1	0.333333	0.0877303
chr14	93760203	93762503	BTBD7	.	7	8	3	1.16667	0.204704
chr1	156286956	156287338	CCT3	.	5	709	1872	0.00387297	0.146217
chr9	88190229	88261333	AGTPBP1	.	6	11	39	0.235294	0.175461
chr6	109249290	109258202	ARMC2	.	3	34	148	0.0327869	0.0877303
chr11	118422500	118430579	IFT46	.	0	0	0	0	0
chr18	48702264	48703946	MEX3C	.	0	0	0	0	0
chr10	225933	295028	ZMYND11	.	3	27	24	0.115385	0.0877303
chr18	39607406	39629569	PIK3C3	.	0	0	0	0	0
chr7	73100965	73101425	WBSCR22	.	4	29	33	0.126984	0.116974
chr1	180953812	180962561	STX6	.	0	0	0	0	0
chr14	61262934	61285565	MNAT1	.	4	137	77	0.0372093	0.116974
chr1	155365249	155429689	ASH1L	POU5F1P4	6	17	123	0.0851064	0.175461
chr1	150202905	150204264	ANP32E	.	0	0	0	0	0
chr3	47466974	47470160	SCAP	.	2	8	31	0.1	0.0584868
chr19	5604593	5604947	SAFB2	.	4	84	16	0.0792079	0.116974
chr6	108225832	108246136	SEC63	.	7	7	48	0.25	0.204704
chr17	40879652	40882936	EZH1	.	4	39	4	0.181818	0.116974
chr15	91524113	91525211	PRC1	PRC1-AS1	0	0	0	0	0
chr12	89853414	89866052	POC1B	.	0	0	0	0	0
chr13	78293666	78327493	SLAIN1	.	4	20	1	0.363636	0.116974
chr5	142779220	142780417	NR3C1	.	0	0	0	0	0
chr11	107916996	107925682	CUL5	.	0	0	0	0	0
chr9	110062421	110087285	RAD23B	.	0	0	0	0	0
chr4	88104354	88116842	KLHL8	.	4	31	11	0.186047	0.116974
chr17	76187050	76188866	AFMID	.	0	0	0	0	0
chr17	49340634	49346265	UTP18	.	6	42	8	0.235294	0.175461
chr3	3819408	3830758	.	.	0	0	0	0	0
chr2	190670377	190682906	PMS1	.	0	0	0	0	0
chrX	72797242	72804408	CHIC1	.	2	2	11	0.285714	0.0584868
chr11	6962801	6977013	ZNF215	.	2	31	11	0.0930233	0.0584868
chr11	68318588	68331900	PPP6R3	.	0	0	0	0	0
chr15	41036244	41037457	RMDN3	.	0	0	0	0	0
chr14	81329100	81366373	CEP128	.	4	204	66	0.0295203	0.116974
chr15	72338064	72338975	MYO9A	.	2	7	17	0.16	0.0584868
chr7	77407654	77408131	RSBN1L	.	2	27	0	0.142857	0.0584868
chr1	230313963	230339036	GALNT2	.	0	0	0	0	0
chr5	38991050	39021238	RICTOR	.	0	0	0	0	0
chr19	8520288	8539128	HNRNPM	.	5	185	111	0.03367	0.146217
chr11	85961337	85967554	EED	.	4	49	72	0.0655738	0.116974
chr10	120488806	120489922	CACUL1	.	4	27	101	0.0620155	0.116974
chr10	116879948	116931050	ATRNL1	.	0	0	0	0	0
chr1	149931602	149936274	OTUD7B	.	5	5	68	0.135135	0.146217
chr10	114286845	114298089	VTI1A	.	3	101	115	0.0276498	0.0877303
chr2	55559701	55562300	CCDC88A	.	3	21	98	0.05	0.0877303
chr4	54292038	54310270	FIP1L1	.	8	100	129	0.0695652	0.233947
chr5	14741935	14758707	ANKH	.	0	0	0	0	0
chr14	31404368	31425448	STRN3	.	3	37	82	0.05	0.0877303
chr6	82900789	82914675	IBTK	.	0	0	0	0	0
chr9	33293677	33295425	NFX1	.	5	1	34	0.277778	0.146217
chr20	35651052	35684059	RBL1	.	4	13	77	0.0879121	0.116974
chr5	619104	620376	CEP72	.	0	0	0	0	0
chr9	5968018	5988545	KIAA2026	.	3	17	25	0.139535	0.0877303
chr7	27824781	27839709	TAX1BP1	.	0	0	0	0	0
chr21	40619626	40630598	BRWD1	.	2	17	79	0.0412371	0.0584868
chr17	80842020	80861354	TBCD	.	0	0	0	0	0
chr16	67644726	67646024	CTCF	.	0	0	0	0	0
chr1	162535801	162570693	UAP1	.	0	0	0	0	0
chrX	64271341	64295792	.	.	0	0	0	0	0
chr7	18705835	18706099	HDAC9	.	4	50	0	0.156863	0.116974
chr3	56694758	56707753	FAM208A	.	0	0	0	0	0
chr2	240929490	240954277	NDUFA10	.	3	64	163	0.0263158	0.0877303
chr2	160602280	160605414	MARCH7	.	0	0	0	0	0
chr18	42281139	42283072	SETBP1	.	0	0	0	0	0
chr6	137015277	137019820	MAP3K5	.	0	0	0	0	0
chr8	101281012	101300495	RNF19A	.	2	71	47	0.0336134	0.0584868
chr6	47251673	47254331	TNFRSF21	.	0	0	0	0	0
chr11	124517260	124518071	SIAE	.	0	0	0	0	0
chr6	90916287	90981660	BACH2	.	0	0	0	0	0
chr15	79748439	79761487	KIAA1024	.	0	0	0	0	0
chr7	102944288	102944937	PMPCB	.	0	0	0	0	0
chr3	141231004	141259451	RASA2	.	0	0	0	0	0
chr1	202724398	202733273	KDM5B	.	4	1	156	0.0506329	0.116974
chr8	101271334	101300495	RNF19A	.	3	6	47	0.111111	0.0877303
chr6	76368977	76388643	SENP6	.	5	27	202	0.0434783	0.146217
chr3	172013152	172028671	FNDC3B	.	0	0	0	0	0
chr7	91924202	91957214	ANKIB1	.	0	0	0	0	0
chr19	11223953	11224438	LDLR	.	0	0	0	0	0
chr12	1345934	1399178	ERC1	.	0	0	0	0	0
chr3	101535638	101540594	NXPE3	.	0	0	0	0	0
chr20	42331129	42333998	MYBL2	.	0	0	0	0	0
chr20	33954359	33971936	UQCC1	.	3	132	128	0.0229885	0.0877303
chr12	112513481	112516545	NAA25	.	4	87	45	0.0601504	0.116974
chr2	210968827	211019335	KANSL1L	.	0	0	0	0	0
chr9	140458885	140459606	DPH7	.	0	0	0	0	0
chr7	122047593	122056218	CADPS2	.	0	0	0	0	0
chr18	60223435	60232329	ZCCHC2	.	3	28	69	0.0612245	0.0877303
chr11	34978930	34999729	PDHX	.	7	326	3	0.0424242	0.204704
chr18	39595439	39609405	PIK3C3	.	0	0	0	0	0
chr12	124856567	124862930	NCOR2	.	0	0	0	0	0
chr7	97820925	97823884	LMTK2	.	0	0	0	0	0
chr6	110048311	110064975	FIG4	.	0	0	0	0	0
chr14	39620949	39628754	TRAPPC6B	.	0	0	0	0	0
chr7	152007050	152055760	KMT2C	.	0	0	0	0	0
chr5	151169883	151170623	G3BP1	.	0	0	0	0	0
chr8	98673299	98718978	MTDH	.	0	0	0	0	0
chr5	176468126	176477937	ZNF346	.	0	0	0	0	0
chr20	25394425	25405963	GINS1	.	0	0	0	0	0
chr19	32847521	32851524	ZNF507	.	0	0	0	0	0
chr18	72997402	73000603	TSHZ1	.	0	0	0	0	0
chr14	89178614	89181539	EML5	.	3	2	15	0.333333	0.0877303
chr9	123230137	123253755	CDK5RAP2	.	0	0	0	0	0
chr6	142487364	142510671	VTA1	.	0	0	0	0	0
chrX	109263579	109352374	TMEM164	.	0	0	0	0	0
chr9	130947825	130950213	CIZ1	.	0	0	0	0	0
chr8	34030494	34042423	.	.	3	8	18	0.222222	0.0877303
chr6	56416981	56479282	DST	.	0	0	0	0	0
chr2	175976295	175986268	ATF2	.	3	56	24	0.0740741	0.0877303
chr19	11230767	11231198	LDLR	.	0	0	0	0	0
chr17	49048067	49064598	SPAG9	.	3	13	22	0.166667	0.0877303
chr1	219366423	219414650	.	.	0	0	0	0	0
chr1	10380100	10384953	KIF1B	.	2	24	5	0.133333	0.0584868
chr2	15629017	15651474	NBAS	.	0	0	0	0	0
chr17	49057106	49064598	SPAG9	.	0	0	0	0	0
chr20	40141484	40162209	CHD6	.	0	0	0	0	0
chr7	131060182	131084192	MKLN1	.	0	0	0	0	0
chr1	51121113	51210447	FAF1	.	0	0	0	0	0
chr11	120317111	120330029	ARHGEF12	.	0	0	0	0	0
chr9	99220660	99220823	HABP4	.	0	0	0	0	0
chr7	143080248	143080415	ZYX	.	0	0	0	0	0
chr5	64747301	64769779	ADAMTS6	.	0	0	0	0	0
chr5	156945830	156947039	ADAM19	.	2	36	102	0.028777	0.0584868
chr2	196544755	196548630	SLC39A10	.	2	23	3	0.148148	0.0584868
chr1	235316020	235318427	RBM34	.	0	0	0	0	0
chr1	1735857	1756938	GNB1	.	0	0	0	0	0
chr11	18010143	18029623	SERGEF	.	0	0	0	0	0
chr3	196612021	196613565	SENP5	.	0	0	0	0	0
chr2	38201182	38231359	RMDN2	RMDN2-AS1	0	0	0	0	0
chr3	179418795	179426745	USP13	.	0	0	0	0	0
chr3	160131260	160141628	SMC4	.	0	0	0	0	0
chr18	19345732	19371518	MIB1	.	3	91	29	0.0495868	0.0877303
chr1	77620133	77635080	PIGK	.	0	0	0	0	0
chr16	75425277	75448593	CFDP1	.	0	0	0	0	0
chr15	49528047	49584734	GALK2	.	0	0	0	0	0
chr3	169840378	169847340	PHC3	.	2	7	73	0.0493827	0.0584868
chr3	133876964	133914026	RYK	.	0	0	0	0	0
chr17	61841375	61843554	CCDC47	.	0	0	0	0	0
chr1	155686796	155695810	DAP3	.	0	0	0	0	0
chr11	116734383	116744352	SIK3	.	0	0	0	0	0
chr3	12976947	12983365	IQSEC1	.	0	0	0	0	0
chr15	77046148	77067458	SCAPER	.	0	0	0	0	0
chr8	98698895	98725997	MTDH	.	0	0	0	0	0
chr4	128842678	128861152	MFSD8	.	0	0	0	0	0
chr3	178626309	178632350	.	.	2	0	0	4	0.0584868
chr2	55785910	55816092	PPP4R3B	.	0	0	0	0	0
chr21	10985044	10998332	.	.	0	0	0	0	0
chr19	45766370	45766625	MARK4	.	0	0	0	0	0
chr18	34740162	34753044	KIAA1328	.	0	0	0	0	0
chr15	41988272	42021547	MGA	.	0	0	0	0	0
chr1	25551492	25554726	SYF2	.	0	0	0	0	0
chr1	150416726	150418877	RPRD2	.	0	0	0	0	0
chr11	108178623	108188248	ATM	.	0	0	0	0	0
chr10	70506917	70513834	CCAR1	.	0	0	0	0	0
chr10	66046225	66061412	.	.	0	0	0	0	0
chr10	38064271	38065503	.	.	2	0	4	0.8	0.0584868
chrX	67731690	67742759	YIPF6	.	0	0	0	0	0
chrX	62875373	62898452	ARHGEF9	.	0	0	0	0	0
chr9	133485340	133495845	FUBP3	.	0	0	0	0	0
chr9	125932180	125936121	STRBP	.	0	0	0	0	0
chr8	48746756	48752750	PRKDC	.	0	0	0	0	0
chr8	131172109	131193126	ASAP1	.	0	0	0	0	0
chr7	72951551	72957974	BCL7B	.	0	0	0	0	0
chr6	90082155	90097115	RRAGD	.	0	0	0	0	0
chr6	57072425	57075243	RAB23	.	0	0	0	0	0
chr6	111726672	111795682	REV3L	.	0	0	0	0	0
chr6	111632271	111652987	REV3L	.	0	0	0	0	0
chr4	187070326	187088416	FAM149A	.	0	0	0	0	0
chr4	151719232	151738409	LRBA	.	0	0	0	0	0
chr4	11330174	11339043	.	.	0	0	0	0	0
chr4	10447449	10447882	.	ZNF518B	0	0	0	0	0
chr3	52661288	52677359	PBRM1	.	0	0	0	0	0
chr3	49717347	49717550	.	APEH	0	0	0	0	0
chr2	47635599	47710111	MSH2	.	0	0	0	0	0
chr2	44204293	44216829	LRPPRC	.	0	0	0	0	0
chr2	206992520	207009750	NDUFS1	.	0	0	0	0	0
chr19	2438160	2438529	LMNB2	.	0	0	0	0	0
chr18	44407921	44409830	PIAS2	.	0	0	0	0	0
chr18	3534191	3582246	DLGAP1	.	0	0	0	0	0
chr17	35830503	35837130	TADA2A	.	0	0	0	0	0
chr17	2929301	2930364	RAP1GAP2	.	0	0	0	0	0
chr1	69550862	69554245	.	.	0	0	0	0	0
chr16	4484384	4487486	DNAJA3	.	0	0	0	0	0
chr1	5987708	6046387	NPHP4	.	0	0	0	0	0
chr14	81223235	81259454	CEP128	.	0	0	0	0	0
chr14	23375403	23378804	RBM23	.	0	0	0	0	0
chr13	100959445	100992513	PCCA	.	0	0	0	0	0
chr12	94804396	94806367	CEP83	.	0	0	0	0	0
chr1	197611840	197621445	DENND1B	.	0	0	0	0	0
chr11	76158113	76159724	EMSY	.	0	0	0	0	0
chr11	108204615	108205768	ATM	.	0	0	0	0	0
chr10	94396940	94410274	KIF11	.	0	0	0	0	0
chr10	75302560	75302889	USP54	.	0	0	0	0	0
chr10	12160747	12162266	DHTKD1	.	0	0	0	0	0
chr9	128419929	128434922	MAPKAP1	.	9	203	52	0.0703125	0.263191
chr12	69214104	69222711	MDM2	.	7	529	3530	0.00344828	0.204704
chr13	113170753	113181798	TUBGCP3	.	11	1	17	1.15789	0.321678
chr8	98725889	98735263	MTDH	.	12	1988	15746	0.00135326	0.350921
chr17	71231614	71233134	C17orf80	.	0	0	0	0	0
chr14	21971315	21972024	METTL3	.	3	64	8	0.0821918	0.0877303
chr5	6604250	6605521	NSUN2	.	7	30	148	0.0782123	0.204704
chr2	128750760	128754065	SAP130	.	12	19	24	0.545455	0.350921
chr14	81362061	81372425	CEP128	.	10	97	75	0.115607	0.292434
chr8	52758220	52773806	PCMTD1	.	3	25	68	0.0638298	0.0877303
chr4	1905942	1941505	WHSC1	.	2	251	142	0.0101523	0.0584868
chr1	150464886	150469384	TARS2	.	4	39	11	0.156863	0.116974
chr4	4650703	4651269	STX18-AS1	.	11	0	7	2.75	0.321678
chr2	10740978	10747437	NOL10	.	0	0	0	0	0
chr1	155385534	155429689	ASH1L	POU5F1P4	4	62	123	0.0430108	0.116974
chr3	171969049	171979873	FNDC3B	.	4	877	2	0.00909091	0.116974
chr10	12039670	12056183	UPF2	.	5	47	35	0.120482	0.146217
chr5	53839008	53843428	SNX18	.	10	90	1	0.217391	0.292434
chr8	37734626	37735069	RAB11FIP1	.	2	34	132	0.0239521	0.0584868
chr1	172520651	172526934	SUCO	.	3	11	377	0.0154242	0.0877303
chr4	1932352	1941505	WHSC1	.	4	1167	142	0.00610687	0.116974
chr8	61484604	61504528	RAB2A	.	0	0	0	0	0
chr2	203329531	203332412	BMPR2	.	4	5	18	0.333333	0.116974
chr9	138741982	138774924	CAMSAP1	.	6	19	36	0.214286	0.175461
chr1	184701970	184706845	EDEM3	.	4	2085	36	0.00377003	0.116974
chr8	37727937	37735069	RAB11FIP1	.	4	9	132	0.056338	0.116974
chr8	52744003	52773806	PCMTD1	.	4	72	68	0.0567376	0.116974
chr3	169854206	169867032	PHC3	.	2	69	55	0.032	0.0584868
chr1	243579003	243589860	SDCCAG8	.	11	26	9	0.611111	0.321678
chr4	39739039	39757359	UBE2K	.	0	0	0	0	0
chr6	17624791	17649531	NUP153	.	0	0	0	0	0
chr14	80944596	80997230	CEP128	.	5	0	50	0.196078	0.146217
chr13	33109905	33111164	N4BP2L2	.	0	0	0	0	0
chr7	22330793	22357656	RAPGEF5	.	0	0	0	0	0
chr14	81329100	81372425	CEP128	.	7	204	75	0.05	0.204704
chr2	173423435	173429801	PDK1	.	4	84	311	0.020202	0.116974
chr3	136183722	136221621	STAG1	.	4	134	103	0.0336134	0.116974
chr3	63898263	63898901	ATXN7	.	0	0	0	0	0
chr14	92592465	92609638	CPSF2	.	0	0	0	0	0
chr7	155457868	155473602	RBM33	.	3	38	65	0.0576923	0.0877303
chr3	169831147	169840532	PHC3	.	9	36	18	0.327273	0.263191
chr8	42828431	42841938	HOOK3	.	0	0	0	0	0
chr3	98502406	98512636	ST3GAL6	.	5	71	1	0.136986	0.146217
chr20	30904020	30904677	KIF3B	.	5	128	104	0.0429185	0.146217
chr20	43600718	43625947	STK4	.	0	0	0	0	0
chr3	101389973	101391057	ZBTB11	.	0	0	0	0	0
chr1	147805338	147808043	NBPF8	.	4	0	2	2.66667	0.116974
chr8	135612678	135622898	ZFAT	ZFAT-AS1	5	12	8	0.47619	0.146217
chr8	103850971	103855975	AZIN1	.	3	478	334	0.00738007	0.0877303
chr3	128514202	128526514	RAB7A	.	3	11	26	0.157895	0.0877303
chr18	59888269	59899660	KIAA1468	.	0	0	0	0	0
chr7	77378740	77394949	RSBN1L	.	7	53	33	0.16092	0.204704
chr1	21097422	21100103	HP1BP3	.	2	27	178	0.0194175	0.0584868
chr10	15863654	15885271	FAM188A	.	2	9	51	0.0655738	0.0584868
chr3	169694733	169706147	SEC62	.	2	436	200	0.00627943	0.0584868
chr15	65471271	65472542	CLPX	.	2	10	41	0.0769231	0.0584868
chr9	35236465	35243361	UNC13B	.	5	90	40	0.0763359	0.146217
chr1	33413822	33415375	RNF19B	.	0	0	0	0	0
chr6	139264649	139265759	REPS1	.	0	0	0	0	0
chr2	99786012	99787892	MITD1	.	0	0	0	0	0
chrX	130498722	130503026	.	.	2	1	0	2	0.0584868
chr2	197777605	197787849	PGAP1	.	0	0	0	0	0
chr1	162535801	162560301	UAP1	.	0	0	0	0	0
chr6	116966876	116980087	ZUFSP	.	2	7	57	0.0615385	0.0584868
chr14	56078736	56086030	KTN1	.	0	0	0	0	0
chr16	81385187	81411307	GAN	.	0	0	0	0	0
chr16	85667519	85667738	GSE1	.	4	2	2	1.6	0.116974
chr8	28866588	28876430	HMBOX1	.	2	41	98	0.0285714	0.0584868
chr11	85707868	85714494	PICALM	.	0	0	0	0	0
chr10	104117795	104119192	GBF1	.	8	73	43	0.136752	0.233947
chr11	92085261	92088570	FAT3	.	0	0	0	0	0
chr10	31661946	31750166	ZEB1	.	3	5	38	0.136364	0.0877303
chr8	42761315	42829337	HOOK3	.	5	101	47	0.0671141	0.146217
chr2	173429230	173460751	PDK1	.	3	280	16	0.020202	0.0877303
chr15	91519905	91525211	PRC1	PRC1-AS1	2	310	192	0.00795229	0.0584868
chr4	2659529	2674099	FAM193A	.	3	41	29	0.084507	0.0877303
chr16	17352844	17353355	XYLT1	.	2	15	33	0.0816327	0.0584868
chr3	27958264	27972446	.	.	6	0	1	6	0.175461
chr13	33306237	33309467	PDS5B	.	0	0	0	0	0
chr4	2951660	2955372	NOP14	NOP14-AS1	0	0	0	0	0
chr20	34241449	34246936	CPNE1	.	2	0	35	0.111111	0.0584868
chr20	49558567	49571822	DPM1	ADNP-AS1	9	566	710	0.0140955	0.263191
chr11	94178975	94180604	MRE11A	.	2	37	17	0.0727273	0.0584868
chr1	168007608	168014465	DCAF6	.	2	357	524	0.00453515	0.0584868
chr2	64083439	64085070	UGP2	.	0	0	0	0	0
chr9	33948371	33956144	UBAP2	.	3	70	2	0.0821918	0.0877303
chr4	3088665	3109150	HTT	.	0	0	0	0	0
chr9	33986757	34017187	UBAP2	.	0	0	0	0	0
chr14	73614502	73640415	PSEN1	.	0	0	0	0	0
chr6	76412360	76412788	SENP6	.	0	0	0	0	0
chr4	88116475	88116842	KLHL8	.	0	0	0	0	0
chr10	3160973	3162236	PFKP	.	7	210	128	0.0412979	0.204704
chr11	18312988	18314523	HPS5	.	0	0	0	0	0
chr14	73181130	73198642	DPF3	.	3	40	40	0.0740741	0.0877303
chr7	100410368	100410830	EPHB4	.	2	2	6	0.444444	0.0584868
chr3	188844845	188850486	.	.	2	2	3	0.666667	0.0584868
chr12	112116954	112121111	BRAP	.	3	13	72	0.0697674	0.0877303
chrX	16846216	16847893	TXLNG	.	0	0	0	0	0
chr3	169854206	169896726	PHC3	.	0	0	0	0	0
chr1	176050287	176105683	RFWD2	.	2	29	34	0.0625	0.0584868
chr8	67986477	67988816	CSPP1	.	2	34	245	0.0142857	0.0584868
chr6	7884591	7889081	BLOC1S5-TXNDC5	.	3	7690	9250	0.00035417	0.0877303
chr5	74109664	74137504	FAM169A	.	0	0	0	0	0
chr15	66044716	66053776	DENND4A	.	2	12	3	0.25	0.0584868
chr5	122868262	122893258	CSNK1G3	.	0	0	0	0	0
chr5	133534776	133541822	PPP2CA	.	0	0	0	0	0
chr19	18258252	18258434	MAST3	.	0	0	0	0	0
chr4	25128885	25160729	SEPSECS	.	3	16	7	0.25	0.0877303
chr5	147468916	147473305	.	SPINK5	0	0	0	0	0
chr8	17829837	17830196	PCM1	.	2	158	106	0.0150943	0.0584868
chr7	65592690	65599361	CRCP	.	0	0	0	0	0
chr2	44428324	44436466	PPM1B	.	4	22	51	0.108108	0.116974
chr1	91382196	91447927	ZNF644	.	0	0	0	0	0
chr18	76953182	76974038	ATP9B	.	5	39	9	0.204082	0.146217
chr1	145646114	145663367	NBPF20	.	0	0	0	0	0
chr10	102683734	102685776	SLF2	.	3	10	75	0.0697674	0.0877303
chr2	128747137	128754065	SAP130	.	0	0	0	0	0
chr22	24698162	24743144	SPECC1L	.	3	19	23	0.139535	0.0877303
chr3	129546645	129551669	TMCC1	.	2	18	1	0.2	0.0584868
chr7	33397466	33427756	BBS9	.	2	2	3	0.666667	0.0584868
chr5	96349351	96364316	LNPEP	.	0	0	0	0	0
chr14	81297486	81304622	CEP128	.	0	0	0	0	0
chr11	118940943	118944661	VPS11	.	5	33	37	0.140845	0.146217
chr11	108199747	108202764	ATM	.	0	0	0	0	0
chr14	21825355	21829372	SUPT16H	.	0	0	0	0	0
chr20	2944917	2945848	VPS16	.	0	0	0	0	0
chr1	78097534	78107340	ZZZ3	.	0	0	0	0	0
chr3	61603333	61609229	PTPRG	.	4	4	2	1.14286	0.116974
chr3	33441680	33467233	UBP1	.	0	0	0	0	0
chr20	30380537	30382351	TPX2	.	0	0	0	0	0
chr1	78177431	78181553	USP33	.	0	0	0	0	0
chr10	90661412	90682193	STAMBPL1	.	0	0	0	0	0
chr1	145594038	145595220	POLR3C	NBPF20	5	52	30	0.120482	0.146217
chr8	618597	624047	ERICH1	.	0	0	0	0	0
chr18	8714136	8720494	.	.	0	0	0	0	0
chr16	18852886	18856973	SMG1	.	0	0	0	0	0
chr15	59204761	59205895	SLTM	.	0	0	0	0	0
chr10	1118055	1126416	WDR37	.	4	4	1	1.33333	0.116974
chr11	120339996	120348235	ARHGEF12	.	0	0	0	0	0
chr16	30740286	30740893	SRCAP	.	0	0	0	0	0
chr16	11114049	11154879	CLEC16A	.	0	0	0	0	0
chr9	81035195	81038128	.	.	0	0	0	0	0
chr5	173371969	173380275	CPEB4	.	3	25	16	0.142857	0.0877303
chr5	134696186	134705832	H2AFY	.	0	0	0	0	0
chr2	27822449	27824309	ZNF512	.	0	0	0	0	0
chr18	20569183	20581692	RBBP8	.	0	0	0	0	0
chr16	85023909	85029613	ZDHHC7	.	3	53	0	0.111111	0.0877303
chr17	59853761	59857762	BRIP1	.	0	0	0	0	0
chr2	69590676	69601245	GFPT1	.	6	145	138	0.0422535	0.175461
chr15	41648236	41668026	NUSAP1	.	2	175	467	0.00622084	0.0584868
chr8	67513932	67514758	MYBL1	.	0	0	0	0	0
chr4	56319220	56322467	CLOCK	.	0	0	0	0	0
chr4	54280781	54310270	FIP1L1	.	0	0	0	0	0
chr3	23710890	23711550	.	.	0	0	0	0	0
chr21	33073307	33078670	SCAF4	.	0	0	0	0	0
chr11	112064196	112072913	BCO2	.	0	0	0	0	0
chr7	77407654	77410091	RSBN1L	.	0	0	0	0	0
chr3	100013930	100016889	TBC1D23	.	0	0	0	0	0
chr12	112743867	112757546	HECTD4	.	0	0	0	0	0
chr1	171492359	171502100	PRRC2C	.	3	14	143	0.0379747	0.0877303
chr11	34107610	34107960	CAPRIN1	.	0	0	0	0	0
chr10	99196947	99197507	EXOSC1	.	0	0	0	0	0
chr3	61607643	61609229	PTPRG	.	0	0	0	0	0
chrX	48433555	48435497	RBM3	.	0	0	0	0	0
chr3	186509513	186522513	RFC4	.	0	0	0	0	0
chr1	22073559	22084276	USP48	.	0	0	0	0	0
chr10	15863654	15889942	FAM188A	.	0	0	0	0	0
chr3	47098310	47108608	SETD2	.	2	6	13	0.2	0.0584868
chr2	173429230	173429801	PDK1	.	2	280	311	0.00675676	0.0584868
chr20	42602006	42635432	TOX2	.	0	0	0	0	0
chr14	69583082	69589077	DCAF5	.	0	0	0	0	0
chr1	160293220	160302347	COPA	.	0	0	0	0	0
chr9	131254704	131255084	SLC27A4	.	0	0	0	0	0
chr8	124089350	124132428	TBC1D31	.	0	0	0	0	0
chr11	86778735	86782657	TMEM135	.	0	0	0	0	0
chr2	15691616	15698758	NBAS	.	0	0	0	0	0
chr2	62227835	62228117	COMMD1	.	0	0	0	0	0
chr6	109215669	109286343	ARMC2	ARMC2-AS1	0	0	0	0	0
chr6	108233919	108246136	SEC63	.	0	0	0	0	0
chr3	169863210	169896726	PHC3	.	2	61	11	0.0547945	0.0584868
chr13	77779390	77818086	MYCBP2	.	4	42	99	0.056338	0.116974
chr1	51005263	51061888	FAF1	.	0	0	0	0	0
chr2	44200745	44209573	LRPPRC	.	0	0	0	0	0
chr16	53907697	53922863	FTO	.	0	0	0	0	0
chr15	65756098	65772737	DPP8	.	0	0	0	0	0
chr15	52876941	52885933	FAM214A	.	0	0	0	0	0
chr1	156127860	156128615	SEMA4A	.	0	0	0	0	0
chr1	155348071	155385714	ASH1L	.	0	0	0	0	0
chr4	48371865	48396670	SLAIN2	.	4	17	3	0.380952	0.116974
chr7	115889073	115892530	TES	.	0	0	0	0	0
chr3	142242834	142279296	ATR	.	0	0	0	0	0
chr2	97399255	97400263	LMAN2L	.	0	0	0	0	0
chr22	50810448	50845304	PPP6R2	.	0	0	0	0	0
chr18	9182379	9208801	ANKRD12	.	0	0	0	0	0
chr18	42362429	42364010	SETBP1	.	0	0	0	0	0
chr16	30507417	30507887	ITGAL	.	0	0	0	0	0
chr6	90454991	90460251	MDN1	.	0	0	0	0	0
chr6	90045020	90053475	UBE2J1	.	0	0	0	0	0
chr3	172080422	172098883	FNDC3B	.	0	0	0	0	0
chr16	69189773	69201088	UTP4	.	0	0	0	0	0
chr12	105385489	105389804	C12orf45	.	0	0	0	0	0
chr11	108172374	108181042	ATM	.	0	0	0	0	0
chr10	126631025	126655350	ZRANB1	.	0	0	0	0	0
chr1	185183638	185200840	SWT1	.	0	0	0	0	0
chr5	74041502	74046492	GFM2	.	0	0	0	0	0
chr8	38693679	38696064	TACC1	.	0	0	0	0	0
chr8	16955670	16977910	MICU3	.	2	0	0	4	0.0584868
chr5	77385216	77425131	AP3B1	.	0	0	0	0	0
chr21	46591524	46596579	ADARB1	.	0	0	0	0	0
chr21	40596333	40610499	BRWD1	.	0	0	0	0	0
chr2	10784445	10808849	NOL10	.	0	0	0	0	0
chr17	64509453	64510584	PRKCA	.	0	0	0	0	0
chr15	44846750	44855423	EIF3J	SPG11	0	0	0	0	0
chr15	101775286	101775782	CHSY1	.	0	0	0	0	0
chr14	81223235	81304622	CEP128	.	0	0	0	0	0
chr11	62491058	62491898	BSCL2	.	0	0	0	0	0
chr1	114372213	114377061	PTPN22	AP4B1-AS1	0	0	0	0	0
chr10	90653627	90665417	STAMBPL1	.	0	0	0	0	0
chr10	5827814	5842668	GDI2	.	2	78	639	0.00557103	0.0584868
chr8	95390407	95423543	RAD54B	.	0	0	0	0	0
chr8	22355513	22370945	PPP3CC	.	0	0	0	0	0
chr7	66273872	66275834	RABGEF1	GTF2IRD1P1	0	0	0	0	0
chr7	131193709	131196192	PODXL	.	3	29	20	0.12	0.0877303
chr6	82923943	82933337	IBTK	.	0	0	0	0	0
chr5	95091099	95099324	RHOBTB3	.	0	0	0	0	0
chr3	51474985	51477919	VPRBP	.	0	0	0	0	0
chr20	50048603	50052298	NFATC2	.	0	0	0	0	0
chr20	23370582	23383709	NAPB	.	0	0	0	0	0
chr17	27248705	27251320	PHF12	.	0	0	0	0	0
chr13	77785301	77818086	MYCBP2	.	0	0	0	0	0
chr1	224592131	224612356	WDR26	.	0	0	0	0	0
chr1	156294762	156304709	CCT3	.	0	0	0	0	0
chr11	34969052	34991833	PDHX	.	0	0	0	0	0
chr10	93711159	93713630	BTAF1	.	0	0	0	0	0
chr10	128768965	128798571	DOCK1	.	0	0	0	0	0
chr10	103557736	103567658	MGEA5	.	3	12	129	0.0422535	0.0877303
chr3	18419661	18462483	SATB1	.	0	0	0	0	0
chr13	20304378	20356931	PSPC1	.	0	0	0	0	0
chr9	3395471	3420870	RFX3	.	0	0	0	0	0
chr8	67504674	67514758	MYBL1	.	0	0	0	0	0
chr7	91700218	91715000	AKAP9	.	0	0	0	0	0
chr6	109215669	109258202	ARMC2	ARMC2-AS1	0	0	0	0	0
chr5	54635837	54675023	SKIV2L2	.	0	0	0	0	0
chr5	32121600	32143986	GOLPH3	.	0	0	0	0	0
chr4	108565957	108581228	PAPSS1	.	0	0	0	0	0
chr3	56657671	56707753	FAM208A	.	0	0	0	0	0
chr3	141272698	141278837	RASA2	.	0	0	0	0	0
chr2	9675962	9676957	ADAM17	.	0	0	0	0	0
chr22	41277773	41278181	XPNPEP3	.	0	0	0	0	0
chr2	190728468	190728954	PMS1	.	0	0	0	0	0
chr20	60699672	60706562	LSM14B	.	0	0	0	0	0
chr19	8520288	8532468	HNRNPM	.	2	185	46	0.0172414	0.0584868
chr19	18648410	18649243	FKBP8	.	0	0	0	0	0
chr17	4109615	4113242	ANKFY1	.	0	0	0	0	0
chr17	27778472	27794234	TAOK1	.	2	52	8	0.0655738	0.0584868
chr17	13768395	13796156	.	.	2	0	4	0.8	0.0584868
chr16	89371613	89383486	ANKRD11	.	0	0	0	0	0
chr15	72300166	72338975	MYO9A	.	0	0	0	0	0
chr1	52289335	52306186	NRDC	.	2	7	151	0.0251572	0.0584868
chr14	35560275	35579835	PPP2R3C	FAM177A1	0	0	0	0	0
chr1	40654726	40661436	RLF	.	0	0	0	0	0
chr11	75672487	75694557	UVRAG	.	0	0	0	0	0
chrX	53588716	53589205	HUWE1	.	0	0	0	0	0
chr8	48752576	48766775	PRKDC	.	0	0	0	0	0
chr7	158423188	158439255	NCAPG2	.	0	0	0	0	0
chr7	101950003	101952188	SH2B2	.	0	0	0	0	0
chr6	82923943	82930430	IBTK	.	0	0	0	0	0
chr6	76344422	76412788	SENP6	.	0	0	0	0	0
chr6	74183087	74189849	MTO1	.	0	0	0	0	0
chr5	74696029	74706928	COL4A3BP	.	0	0	0	0	0
chr5	179135239	179136060	CANX	.	0	0	0	0	0
chr5	172507587	172550205	CREBRF	.	0	0	0	0	0
chr4	170428187	170459062	NEK1	.	0	0	0	0	0
chr3	192444969	192463145	.	.	0	0	0	0	0
chr3	169866873	169896726	PHC3	.	0	0	0	0	0
chr3	167437849	167443261	PDCD10	.	0	0	0	0	0
chr2	203139835	203169329	NOP58	.	0	0	0	0	0
chr2	17942662	17946340	GEN1	.	0	0	0	0	0
chr19	6890491	6916379	ADGRE1	.	0	0	0	0	0
chr1	93070863	93091491	EVI5	.	0	0	0	0	0
chr19	1880363	1922898	.	ABHD17A	0	0	0	0	0
chr18	34534393	34539398	KIAA1328	.	0	0	0	0	0
chr17	3955264	3961449	ZZEF1	.	0	0	0	0	0
chr17	19843025	19866335	AKAP10	.	0	0	0	0	0
chr17	15974722	15979016	NCOR1	.	0	0	0	0	0
chr1	46105881	46120991	GPBP1L1	.	0	0	0	0	0
chr1	243468014	243493994	SDCCAG8	.	0	0	0	0	0
chr12	31600471	31633189	DENND5B	.	0	0	0	0	0
chr12	26864105	26943160	ITPR2	.	0	0	0	0	0
chr1	21306826	21329301	EIF4G3	.	0	0	0	0	0
chr1	21167348	21191755	EIF4G3	.	0	0	0	0	0
chr11	65267236	65267597	.	MALAT1	0	0	0	0	0
chr1	151150476	151156969	VPS72	.	0	0	0	0	0
chr11	122646926	122647918	UBASH3B	.	0	0	0	0	0
chr10	76910271	76910864	SAMD8	.	0	0	0	0	0
chr10	35805450	35819171	CCNY	.	0	0	0	0	0
chr2	208841374	208842310	PLEKHM3	.	7	2	1	3.5	0.204704
chr10	34558584	34573173	PARD3	.	16	42	45	0.363636	0.467895
chr8	98673299	98703416	MTDH	.	9	2385	1382	0.00477707	0.263191
chr11	85733409	85742653	PICALM	.	7	97	33	0.10687	0.204704
chr3	61608136	61609229	PTPRG	.	6	2	2	2.4	0.175461
chr9	86292641	86293514	UBQLN1	.	4	50	463	0.0155642	0.116974
chr6	155095122	155116273	SCAF8	.	2	83	26	0.0363636	0.0584868
chr2	82024941	82025642	.	.	3	11	0	0.5	0.0877303
chr4	77055327	77065626	NUP54	.	5	28	31	0.166667	0.146217
chr13	51501542	51523641	RNASEH2B	.	3	34	133	0.0357143	0.0877303
chr10	70227879	70229920	DNA2	.	0	0	0	0	0
chr1	29481207	29481422	SRSF4	.	4	92	93	0.0430108	0.116974
chr4	156617907	156643344	GUCY1A3	.	3	143	23	0.0359281	0.0877303
chr1	162535801	162536138	UAP1	.	0	0	0	0	0
chr6	161469647	161471011	MAP3K4	.	4	22	15	0.210526	0.116974
chr16	11940357	11941663	RSL1D1	.	8	947	92	0.0153846	0.233947
chr2	177161587	177202305	MTX2	.	8	7	2	1.6	0.233947
chr3	3178943	3186394	TRNT1	.	7	31	1	0.424242	0.204704
chr22	32874967	32875262	FBXO7	.	0	0	0	0	0
chr4	83799882	83803093	SEC31A	.	5	30	111	0.0704225	0.146217
chr22	42204878	42206295	CCDC134	.	8	6	21	0.571429	0.233947
chr2	86088303	86097381	ST3GAL5	.	2	15	4	0.2	0.0584868
chr7	39243833	39247219	POU6F2	.	2	1	1	1.33333	0.0584868
chr16	11815432	11830089	TXNDC11	.	3	210	17	0.0263158	0.0877303
chr3	33725850	33738425	CLASP2	.	3	11	55	0.0895522	0.0877303
chr1	115262199	115263338	CSDE1	.	3	108	1953	0.0029098	0.0877303
chr1	51001040	51061888	FAF1	.	5	266	90	0.0280112	0.146217
chrX	154736558	154766779	TMLHE	.	7	3	0	3.5	0.204704
chr10	76153898	76158337	ADK	.	3	229	11	0.0248963	0.0877303
chr2	211018218	211019335	KANSL1L	.	2	15	2	0.222222	0.0584868
chr2	72692288	72707879	EXOC6B	.	10	2	24	0.740741	0.292434
chr7	40027197	40041630	CDK13	.	0	0	0	0	0
chr11	93429485	93433352	CEP295	.	0	0	0	0	0
chr1	162546566	162570693	UAP1	.	3	1452	3	0.00412088	0.0877303
chr17	5364258	5365866	DHX33	.	0	0	0	0	0
chr14	81209418	81297638	CEP128	.	6	15	243	0.046332	0.175461
chr8	119251953	119253509	SAMD12	.	3	1	8	0.6	0.0877303
chr9	88233897	88248289	AGTPBP1	.	0	0	0	0	0
chr16	88694029	88695262	ZC3H18	.	0	0	0	0	0
chr16	22236974	22237296	EEF2K	.	10	4	26	0.645161	0.292434
chr6	109220896	109233761	ARMC2	ARMC2-AS1	9	367	44	0.0436893	0.263191
chr1	169947225	170001116	KIFAP3	.	0	0	0	0	0
chr1	51868106	51874004	EPS15	.	4	2	72	0.106667	0.116974
chr10	31661946	31676727	ZEB1	.	2	5	3	0.444444	0.0584868
chr17	73238416	73239651	GGA3	.	0	0	0	0	0
chr7	30661008	30662078	GARS	.	2	104	450	0.00720721	0.0584868
chr1	187223507	187298192	LINC01036	.	5	2	9	0.833333	0.146217
chr14	81380665	81382906	CEP128	.	0	0	0	0	0
chr2	20478343	20527139	PUM2	.	4	5	44	0.16	0.116974
chr21	34614190	34625135	IFNAR2	.	5	28	38	0.149254	0.146217
chr1	151611363	151611595	SNX27	.	0	0	0	0	0
chr7	4780468	4780654	FOXK1	.	4	10	16	0.296296	0.116974
chr2	99811213	99812219	MRPL30	.	0	0	0	0	0
chr1	114377531	114397671	PTPN22	AP4B1-AS1	0	0	0	0	0
chr8	100108539	100205285	VPS13B	.	4	63	7	0.112676	0.116974
chr4	1918597	1936989	WHSC1	.	3	1732	1192	0.00205128	0.0877303
chr13	95953494	96003967	.	.	6	16	0	0.705882	0.175461
chr5	100222046	100231489	ST8SIA4	.	0	0	0	0	0
chr11	120446377	120447998	GRIK4	.	3	1	0	3	0.0877303
chr22	46125304	46136418	ATXN10	.	0	0	0	0	0
chr16	22360599	22361170	CDR2	.	4	54	54	0.0733945	0.116974
chr2	85595808	85598685	ELMOD3	.	0	0	0	0	0
chr7	24663281	24708279	MPP6	.	2	9	79	0.0449438	0.0584868
chr10	7409610	7423911	SFMBT2	.	4	17	21	0.205128	0.116974
chr7	148851036	148851432	ZNF398	.	4	16	13	0.266667	0.116974
chr1	58992932	59004982	OMA1	.	0	0	0	0	0
chr7	22999874	23030758	FAM126A	.	3	68	15	0.0714286	0.0877303
chr6	107824860	107827631	SOBP	.	0	0	0	0	0
chr4	88091230	88116842	KLHL8	.	3	15	11	0.222222	0.0877303
chr10	5838725	5842668	GDI2	.	7	60	639	0.02	0.204704
chr9	140646782	140652463	EHMT1	.	3	22	15	0.157895	0.0877303
chr2	201721404	201726585	CLK1	.	3	59	114	0.0344828	0.0877303
chr10	1125950	1126416	WDR37	.	7	50	1	0.269231	0.204704
chr4	88084709	88116842	KLHL8	.	3	0	11	0.5	0.0877303
chr22	46085591	46114373	ATXN10	.	0	0	0	0	0
chr1	24840803	24841057	RCAN3	.	3	6	4	0.545455	0.0877303
chr16	70292882	70296427	AARS	.	0	0	0	0	0
chr14	35331249	35331528	BAZ1A	.	0	0	0	0	0
chr8	98698895	98718978	MTDH	.	6	8865	1984	0.00110599	0.175461
chr4	52729602	52744020	DCUN1D4	.	3	11	40	0.115385	0.0877303
chr11	13435076	13466728	BTBD10	.	0	0	0	0	0
chr2	168869143	168873605	STK39	.	0	0	0	0	0
chr5	172359438	172362313	ERGIC1	.	0	0	0	0	0
chr5	139819703	139828890	ANKHD1	.	4	110	11	0.0655738	0.116974
chr2	61749745	61753656	XPO1	.	0	0	0	0	0
chr21	45106684	45108121	RRP1B	.	5	1	34	0.277778	0.146217
chr12	112096539	112098479	BRAP	.	0	0	0	0	0
chr2	61118817	61128218	REL	.	3	137	15	0.0392157	0.0877303
chr7	23400204	23401360	IGF2BP3	.	0	0	0	0	0
chr2	182346324	182350719	ITGA4	.	2	1010	143	0.0034662	0.0584868
chr3	71090478	71102924	FOXP1	.	0	0	0	0	0
chr2	204244930	204267457	ABI2	.	3	86	18	0.0571429	0.0877303
chr1	28362054	28374937	EYA3	.	0	0	0	0	0
chr10	126370175	126370948	FAM53B	.	0	0	0	0	0
chr17	27248705	27254081	PHF12	LOC101927018	0	0	0	0	0
chrX	135304551	135326954	MAP7D3	.	4	294	409	0.0113636	0.116974
chr7	30590251	30601744	LOC401320	.	7	4	12	0.823529	0.204704
chr3	197541778	197547301	LRCH3	.	0	0	0	0	0
chr22	38917612	38964294	DMC1	.	2	2	3	0.666667	0.0584868
chr1	173961892	173962273	RC3H1	.	0	0	0	0	0
chr7	104714065	104719410	KMT2E	.	0	0	0	0	0
chr8	68018139	68028357	CSPP1	.	2	28	8	0.108108	0.0584868
chr8	29927157	29927575	MIR548O2	.	3	383	946	0.00451128	0.0877303
chr9	125932180	125946577	STRBP	.	0	0	0	0	0
chr6	90039501	90053475	UBE2J1	.	0	0	0	0	0
chr3	119219541	119222868	TIMMDC1	.	0	0	0	0	0
chr9	86294689	86301070	UBQLN1	.	2	458	28	0.00821355	0.0584868
chr4	103644027	103647840	MANBA	.	4	10	9	0.4	0.116974
chr5	78936673	78964851	PAPD4	.	0	0	0	0	0
chr14	23395341	23396023	PRMT5	.	3	46	333	0.0157895	0.0877303
chr18	42281139	42375009	SETBP1	.	3	7	6	0.428571	0.0877303
chr14	103470264	103478525	CDC42BPB	.	7	18	13	0.4375	0.204704
chr5	78915434	78919312	PAPD4	.	3	24	9	0.176471	0.0877303
chr22	38083916	38084999	NOL12	.	7	53	11	0.215385	0.204704
chr15	41988272	41989221	MGA	.	0	0	0	0	0
chr12	83250788	83251359	TMTC2	.	0	0	0	0	0
chr1	193202122	193205486	CDC73	.	0	0	0	0	0
chr11	120916382	120918376	TBCEL	.	0	0	0	0	0
chr10	105371337	105420872	SH3PXD2A	.	0	0	0	0	0
chr8	105080739	105161076	RIMS2	.	0	0	0	0	0
chr7	158672374	158684024	WDR60	.	6	2	16	0.631579	0.175461
chr6	74175931	74176329	MTO1	.	2	17	48	0.0606061	0.0584868
chr4	148867767	148887990	ARHGAP10	.	3	50	48	0.0606061	0.0877303
chr3	133341934	133343019	TOPBP1	.	3	201	234	0.0137615	0.0877303
chr17	28808160	28811788	GOSR1	.	3	162	148	0.0192926	0.0877303
chr12	19615443	19626289	AEBP2	.	0	0	0	0	0
chr3	111985084	111999630	SLC9C1	.	0	0	0	0	0
chr6	90571844	90581107	CASP8AP2	.	2	40	0	0.097561	0.0584868
chr19	18648410	18649246	FKBP8	.	0	0	0	0	0
chr2	69553302	69601245	GFPT1	.	0	0	0	0	0
chr14	97008579	97031551	PAPOLA	.	0	0	0	0	0
chr16	74493579	74497377	GLG1	.	5	35	214	0.04	0.146217
chr1	15860731	15863309	DNAJC16	.	0	0	0	0	0
chr8	90657364	90660841	.	.	0	0	0	0	0
chr6	20781375	20846409	CDKAL1	.	3	114	73	0.0319149	0.0877303
chr5	100191806	100231489	ST8SIA4	.	4	118	224	0.0233236	0.116974
chr20	47886478	47888287	ZNFX1	.	0	0	0	0	0
chr11	85722072	85742653	PICALM	.	0	0	0	0	0
chr11	74500670	74528759	RNF169	.	4	23	57	0.0987654	0.116974
chr1	215749243	215752480	KCTD3	.	0	0	0	0	0
chr7	72883846	72884813	BAZ1B	.	4	77	131	0.0382775	0.116974
chr7	30590251	30614497	LOC401320	.	0	0	0	0	0
chr3	121354581	121356103	HCLS1	.	2	645	0	0.00619195	0.0584868
chr18	12999419	13073184	CEP192	.	0	0	0	0	0
chr13	61013821	61041513	TDRD3	.	4	5	8	0.571429	0.116974
chr5	38991050	39003724	RICTOR	.	0	0	0	0	0
chr5	179134132	179137066	CANX	.	0	0	0	0	0
chr20	47707278	47711500	CSE1L	.	6	700	22	0.0165975	0.175461
chr18	72589152	72601994	ZNF407	.	3	27	3	0.193548	0.0877303
chr18	2666155	2674144	SMCHD1	.	0	0	0	0	0
chr17	80417867	80430574	NARF	.	0	0	0	0	0
chr12	46285562	46287504	ARID2	.	0	0	0	0	0
chr3	114069120	114070725	ZBTB20	ZBTB20-AS1	0	0	0	0	0
chr9	14639893	14680160	ZDHHC21	.	2	5	1	0.571429	0.0584868
chr6	7886193	7904956	BLOC1S5-TXNDC5	.	3	409	7291	0.00077912	0.0877303
chr6	108222573	108246136	SEC63	.	2	10	48	0.0677966	0.0584868
chr5	31421378	31424578	DROSHA	.	2	12	1	0.285714	0.0584868
chr4	83793096	83796975	SEC31A	.	0	0	0	0	0
chr20	60572605	60574164	TAF4	.	6	13	56	0.171429	0.175461
chrX	53652117	53654466	HUWE1	.	3	3	164	0.0357143	0.0877303
chr15	90984737	90986710	IQGAP1	.	0	0	0	0	0
chr5	126140467	126147590	LMNB1	.	2	226	73	0.0133333	0.0584868
chr8	68163533	68172161	ARFGEF1	.	2	6	33	0.1	0.0584868
chr8	10683661	10692285	PINX1	.	2	147	27	0.0228571	0.0584868
chr19	49642924	49643345	PPFIA3	.	2	8	25	0.117647	0.0584868
chr17	65924470	65928135	BPTF	.	6	5	12	0.666667	0.175461
chr16	9014215	9024254	USP7	.	2	58	139	0.020202	0.0584868
chr15	101691924	101719185	.	.	0	0	0	0	0
chr1	150413398	150418877	RPRD2	.	0	0	0	0	0
chr8	17847367	17851128	PCM1	.	0	0	0	0	0
chr3	52446826	52448603	PHF7	.	2	44	1	0.0869565	0.0584868
chr2	202010100	202014558	CFLAR	CFLAR-AS1	0	0	0	0	0
chr16	70566381	70573110	SF3B3	.	0	0	0	0	0
chr6	2397454	2399271	GMDS-AS1	.	0	0	0	0	0
chr4	148800382	148803083	ARHGAP10	.	0	0	0	0	0
chr4	106155053	106158508	TET2	TET2-AS1	0	0	0	0	0
chr18	55280833	55283207	NARS	.	2	358	1598	0.00204394	0.0584868
chr18	20570899	20576425	RBBP8	.	0	0	0	0	0
chr14	91755448	91760662	CCDC88C	.	0	0	0	0	0
chr1	48821341	48825442	SPATA6	.	4	1	0	4	0.116974
chr14	35438375	35441270	.	.	4	0	1	4	0.116974
chr10	93711159	93726514	BTAF1	.	0	0	0	0	0
chr16	70575571	70578436	SF3B3	.	4	921	47	0.00825593	0.116974
chr1	184680856	184681732	EDEM3	.	4	347	324	0.0119048	0.116974
chr5	58284319	58289292	PDE4D	.	0	0	0	0	0
chr21	46591524	46605006	ADARB1	.	3	75	1	0.0779221	0.0877303
chr8	42780699	42814457	HOOK3	.	0	0	0	0	0
chr8	100108539	100168971	VPS13B	.	2	63	2	0.0606061	0.0584868
chr2	169018296	169038600	STK39	.	0	0	0	0	0
chr1	89206670	89237562	PKN2	.	3	11	7	0.315789	0.0877303
chr18	9182379	9211782	ANKRD12	.	0	0	0	0	0
chr14	91763648	91766414	CCDC88C	.	0	0	0	0	0
chr1	41474465	41475261	CTPS1	.	0	0	0	0	0
chr11	118360506	118363945	KMT2A	.	0	0	0	0	0
chr1	202742245	202746222	KDM5B	.	0	0	0	0	0
chr19	11168930	11170863	SMARCA4	.	0	0	0	0	0
chr16	70566381	70578436	SF3B3	.	0	0	0	0	0
chr2	136505836	136519481	UBXN4	.	0	0	0	0	0
chr8	42805530	42873637	HOOK3	.	0	0	0	0	0
chr17	54926056	54934026	DGKE	.	2	65	0	0.0606061	0.0584868
chr1	67356836	67371058	WDR78	.	3	6	0	0.857143	0.0877303
chr15	50875285	50884823	TRPM7	.	0	0	0	0	0
chr12	123798166	123800207	SBNO1	.	0	0	0	0	0
chr12	111951160	111957880	ATXN2	.	4	6	63	0.114286	0.116974
chr1	172520651	172560211	SUCO	.	0	0	0	0	0
chr1	151630710	151641111	SNX27	.	0	0	0	0	0
chr1	150413398	150416853	RPRD2	.	6	65	121	0.0641711	0.175461
chr10	103916775	103917971	NOLC1	.	3	24	588	0.00978793	0.0877303
chr22	21178613	21193019	PI4KA	.	0	0	0	0	0
chr9	86292641	86301070	UBQLN1	.	5	50	28	0.126582	0.146217
chr9	111812562	111826847	TMEM245	.	3	6	104	0.0540541	0.0877303
chr8	42805530	42841938	HOOK3	.	0	0	0	0	0
chr2	203817281	203826149	CARF	.	2	23	5	0.137931	0.0584868
chr2	203155045	203160560	NOP58	.	0	0	0	0	0
chr2	128922303	128928858	UGGT1	.	0	0	0	0	0
chr17	40174416	40174658	NKIRAS2	.	0	0	0	0	0
chr15	41961025	41991357	MGA	.	0	0	0	0	0
chr10	3201105	3202522	PITRM1	.	0	0	0	0	0
chr4	2986239	3031136	GRK4	.	0	0	0	0	0
chr12	4219087	4219446	.	.	0	0	0	0	0
chr1	153734045	153737539	INTS3	.	0	0	0	0	0
chrX	53641494	53641706	HUWE1	.	2	4	42	0.0851064	0.0584868
chr8	42761315	42785315	HOOK3	.	0	0	0	0	0
chr6	45479982	45514707	RUNX2	.	3	89	5	0.0631579	0.0877303
chr5	70805291	70806978	BDP1	.	0	0	0	0	0
chr4	87685745	87689129	PTPN13	.	0	0	0	0	0
chr3	138400808	138403645	PIK3CB	.	0	0	0	0	0
chr18	42449194	42533305	SETBP1	.	0	0	0	0	0
chr14	50262508	50267414	NEMF	.	3	139	57	0.0304569	0.0877303
chr11	78176921	78204241	NARS2	.	2	20	3	0.166667	0.0584868
chr1	171548492	171556890	PRRC2C	.	0	0	0	0	0
chr8	98817580	98837381	LAPTM4B	.	0	0	0	0	0
chr6	76331247	76357517	SENP6	.	0	0	0	0	0
chr4	77916933	77952123	2011-09-01	.	3	4	26	0.193548	0.0877303
chr3	50150815	50151684	RBM5	.	0	0	0	0	0
chr22	42204878	42206004	CCDC134	.	4	6	16	0.347826	0.116974
chr17	57842331	57851246	VMP1	.	7	132	12	0.0965517	0.204704
chr17	49067810	49075978	SPAG9	.	2	27	12	0.1	0.0584868
chr17	26490568	26499644	NLK	.	2	20	32	0.0754717	0.0584868
chr14	81209418	81307112	CEP128	.	5	15	205	0.0452489	0.146217
chr13	52971366	52976816	THSD1	.	0	0	0	0	0
chr1	184671944	184677478	EDEM3	.	0	0	0	0	0
chr11	120447096	120447998	GRIK4	.	0	0	0	0	0
chr10	111883774	111890244	ADD3	.	0	0	0	0	0
chr3	155547476	155551830	SLC33A1	.	0	0	0	0	0
chr3	169840378	169843795	PHC3	.	0	0	0	0	0
chr3	185155234	185161424	MAP3K13	.	2	18	7	0.153846	0.0584868
chr14	75576387	75577074	NEK9	.	0	0	0	0	0
chr14	39627488	39628754	TRAPPC6B	.	0	0	0	0	0
chr8	30938382	30958471	WRN	.	2	55	21	0.0519481	0.0584868
chr7	105121498	105135700	PUS7	.	0	0	0	0	0
chr6	71242862	71248104	FAM135A	.	2	10	9	0.2	0.0584868
chr6	62687970	62757899	KHDRBS2	.	0	0	0	0	0
chr6	170626457	170632347	FAM120B	.	0	0	0	0	0
chr5	64863339	64868113	PPWD1	.	0	0	0	0	0
chr22	38894089	38897285	DDX17	.	2	2028	153	0.00183318	0.0584868
chr22	38620791	38627340	TMEM184B	.	0	0	0	0	0
chr2	171862656	171863573	TLK1	.	0	0	0	0	0
chr2	136688051	136691560	DARS	.	0	0	0	0	0
chr19	8520288	8536311	HNRNPM	.	0	0	0	0	0
chr18	9204473	9239554	ANKRD12	.	0	0	0	0	0
chr17	35578644	35583373	ACACA	.	0	0	0	0	0
chr16	11096930	11118778	CLEC16A	.	0	0	0	0	0
chr13	41133645	41134997	FOXO1	.	0	0	0	0	0
chr1	243456392	243471479	SDCCAG8	.	0	0	0	0	0
chr1	223991875	223994649	TP53BP2	.	0	0	0	0	0
chr1	171492359	171494104	PRRC2C	.	0	0	0	0	0
chr11	128963515	129034322	ARHGAP32	.	0	0	0	0	0
chr6	18212718	18214012	KDM1B	.	0	0	0	0	0
chr10	518378	532470	DIP2C	.	0	0	0	0	0
chr7	98564663	98569568	TRRAP	.	0	0	0	0	0
chr6	155108994	155154543	SCAF8	.	0	0	0	0	0
chr5	75737217	75758139	IQGAP2	.	0	0	0	0	0
chr19	12635609	12639510	ZNF564	.	3	0	1	3	0.0877303
chr16	11114049	11118778	CLEC16A	.	0	0	0	0	0
chr9	86274694	86284242	UBQLN1	.	0	0	0	0	0
chr8	640897	642612	ERICH1	.	0	0	0	0	0
chr7	155493466	155499762	RBM33	.	0	0	0	0	0
chr5	43675612	43704444	NNT	.	0	0	0	0	0
chr3	65415194	65428524	MAGI1	.	0	0	0	0	0
chr3	47651555	47680270	SMARCC1	.	5	41	178	0.0454545	0.146217
chr3	182788786	182789145	MCCC1	.	3	31	19	0.117647	0.0877303
chr2	201994451	202014558	CFLAR	CFLAR-AS1	0	0	0	0	0
chr17	58538023	58539422	APPBP2	.	0	0	0	0	0
chr17	45405634	45422464	EFCAB13	.	0	0	0	0	0
chr1	47745912	47748131	STIL	.	0	0	0	0	0
chr12	117365827	117387511	FBXW8	.	0	0	0	0	0
chr5	134010304	134011815	SEC24A	.	0	0	0	0	0
chr14	90446883	90451554	TDP1	.	0	0	0	0	0
chr12	29492783	29494749	ERGIC2	.	0	0	0	0	0
chr1	114964057	115007010	TRIM33	.	0	0	0	0	0
chrX	130883333	130918067	FIRRE	.	0	0	0	0	0
chr9	88247576	88261333	AGTPBP1	.	0	0	0	0	0
chr9	123280704	123301442	CDK5RAP2	.	0	0	0	0	0
chr8	16955966	16991770	MICU3	.	0	0	0	0	0
chr7	65705311	65706257	TPST1	.	0	0	0	0	0
chr6	149663820	149700654	TAB2	.	0	0	0	0	0
chr5	76745584	76760634	WDR41	.	0	0	0	0	0
chr3	69077050	69077446	TMF1	.	0	0	0	0	0
chr3	57618991	57627474	DENND6A	.	0	0	0	0	0
chr18	13681603	13682104	FAM210A	.	2	23	5	0.137931	0.0584868
chr15	91030185	91035943	IQGAP1	.	0	0	0	0	0
chr14	81297486	81297638	CEP128	.	0	0	0	0	0
chr1	36213507	36214205	CLSPN	.	0	0	0	0	0
chr12	1213915	1225199	ERC1	.	0	0	0	0	0
chr1	197611840	197627499	DENND1B	.	0	0	0	0	0
chr10	89268092	89280926	MINPP1	.	0	0	0	0	0
chr3	188925164	188956698	TPRG1	TPRG1-AS2	0	0	0	0	0
chr9	33953282	33996331	UBAP2	.	0	0	0	0	0
chr8	42716887	42729149	RNF170	.	0	0	0	0	0
chr8	22332466	22355625	PPP3CC	.	0	0	0	0	0
chr6	90461149	90463341	MDN1	.	0	0	0	0	0
chr4	148944413	148968202	ARHGAP10	.	0	0	0	0	0
chr3	132389041	132391021	UBA5	ACAD11	0	0	0	0	0
chr2	68717321	68772444	APLF	.	0	0	0	0	0
chr2	165969394	165970480	SCN3A	.	0	0	0	0	0
chr2	106739425	106782539	UXS1	.	0	0	0	0	0
chr20	33065576	33069011	ITCH	.	0	0	0	0	0
chr19	19756682	19757156	ATP13A1	.	0	0	0	0	0
chr15	65790201	65793117	DPP8	.	3	26	74	0.0594059	0.0877303
chr14	71443658	71462642	PCNX1	.	0	0	0	0	0
chr1	185143503	185144245	SWT1	.	0	0	0	0	0
chr11	68334481	68363686	PPP6R3	.	0	0	0	0	0
chr1	162567581	162571304	UAP1	.	0	0	0	0	0
chr1	15862969	15863309	DNAJC16	.	3	30	6	0.162162	0.0877303
chr5	153409048	153414527	FAM114A2	.	0	0	0	0	0
chr2	88874183	88895181	EIF2AK3	LOC101928371	0	0	0	0	0
chrX	53432176	53432323	SMC1A	.	0	0	0	0	0
chrX	10031484	10035530	WWC3	.	0	0	0	0	0
chr9	6420911	6421142	UHRF2	.	0	0	0	0	0
chr9	19286766	19305525	DENND4C	.	0	0	0	0	0
chr8	61496766	61504528	RAB2A	.	0	0	0	0	0
chr7	129665997	129688984	ZC3HC1	.	0	0	0	0	0
chr6	76376427	76407233	SENP6	.	0	0	0	0	0
chr6	3076997	3078169	RIPK1	.	0	0	0	0	0
chr6	18236682	18237747	DEK	.	0	0	0	0	0
chr5	76330242	76342502	AGGF1	.	0	0	0	0	0
chr5	5292679	5293787	.	ADAMTS16	0	0	0	0	0
chr5	32125898	32143986	GOLPH3	.	0	0	0	0	0
chr5	171479932	171488272	STK10	.	0	0	0	0	0
chr5	130840318	130883883	RAPGEF6	.	0	0	0	0	0
chr5	118576113	118580271	DMXL1	.	2	4	32	0.108108	0.0584868
chr4	83970318	83978561	COPS4	.	0	0	0	0	0
chr4	1961197	1962878	WHSC1	.	0	0	0	0	0
chr4	129752887	129773423	JADE1	.	0	0	0	0	0
chr3	155547476	155560408	SLC33A1	.	0	0	0	0	0
chr2	9650107	9668083	ADAM17	.	0	0	0	0	0
chr2	38536520	38546161	ATL2	.	0	0	0	0	0
chr2	29140758	29152576	WDR43	.	0	0	0	0	0
chr2	136402948	136418963	R3HDM1	.	0	0	0	0	0
chr21	34614190	34633032	IFNAR2	.	0	0	0	0	0
chr21	34614144	34660566	.	IL10RB-AS1	0	0	0	0	0
chr19	34922765	34929671	UBA2	.	0	0	0	0	0
chr19	33600622	33602808	GPATCH1	.	2	21	11	0.121212	0.0584868
chr19	2111677	2111827	AP3D1	.	0	0	0	0	0
chr19	19049161	19049858	HOMER3	.	0	0	0	0	0
chr1	8568685	8617582	RERE	.	0	0	0	0	0
chr18	23612362	23637706	SS18	.	0	0	0	0	0
chr17	80521229	80521424	FOXK2	.	0	0	0	0	0
chr17	38065210	38066177	GSDMB	.	0	0	0	0	0
chr16	89961445	89967202	TCF25	.	0	0	0	0	0
chr16	71710349	71713438	PHLPP2	.	0	0	0	0	0
chr16	70566381	70575737	SF3B3	.	0	0	0	0	0
chr15	93480747	93518180	CHD2	.	0	0	0	0	0
chr15	68378643	68457142	PIAS1	.	0	0	0	0	0
chr15	63978557	63981898	HERC1	.	2	62	36	0.040404	0.0584868
chr15	43102811	43109295	TTBK2	.	0	0	0	0	0
chr1	52937623	52975384	ZCCHC11	.	0	0	0	0	0
chr14	91409421	91467503	RPS6KA5	.	0	0	0	0	0
chr14	76238076	76259443	TTLL5	.	0	0	0	0	0
chr14	73614502	73659572	PSEN1	.	0	0	0	0	0
chr1	45340349	45341367	EIF2B3	.	0	0	0	0	0
chr13	95886863	95900007	ABCC4	.	0	0	0	0	0
chr12	26864105	26878698	ITPR2	.	0	0	0	0	0
chr1	198201682	198233365	NEK7	.	0	0	0	0	0
chr11	66515849	66526567	C11orf80	.	0	0	0	0	0
chr10	98703869	98711953	LCOR	.	0	0	0	0	0
chr10	94372796	94381230	KIF11	.	0	0	0	0	0
chrX	53423146	53432323	SMC1A	.	0	0	0	0	0
chrX	46712910	46719537	RP2	.	0	0	0	0	0
chrX	151092840	151093315	MAGEA4	.	0	0	0	0	0
chrX	109263579	109310624	TMEM164	.	0	0	0	0	0
chrX	10031484	10062321	WWC3	.	0	0	0	0	0
chr9	79890413	79908424	VPS13A	.	0	0	0	0	0
chr9	72333252	72356774	PTAR1	.	0	0	0	0	0
chr9	7011697	7015929	KDM4C	.	0	0	0	0	0
chr9	6475390	6486925	UHRF2	.	0	0	0	0	0
chr9	5742868	5774357	RIC1	.	0	0	0	0	0
chr9	33941646	33944637	UBAP2	.	0	0	0	0	0
chr9	20907148	20933102	FOCAD	.	0	0	0	0	0
chr9	15447092	15460311	SNAPC3	.	0	0	0	0	0
chr9	134025710	134039531	NUP214	.	0	0	0	0	0
chr9	130501960	130509550	SH2D3C	.	0	0	0	0	0
chr9	126392654	126439068	DENND1A	.	0	0	0	0	0
chr9	123280704	123280923	CDK5RAP2	.	0	0	0	0	0
chr9	121693396	121739714	.	.	0	0	0	0	0
chr9	117228546	117241051	DFNB31	.	0	0	0	0	0
chr9	107485148	107485999	.	.	0	0	0	0	0
chr8	84324027	84324290	.	.	0	0	0	0	0
chr8	62489330	62496588	ASPH	.	0	0	0	0	0
chr8	17867055	17872349	PCM1	.	0	0	0	0	0
chr8	132952745	132982890	EFR3A	.	0	0	0	0	0
chr8	103845283	103848618	AZIN1	.	0	0	0	0	0
chr8	100568677	100597745	VPS13B	.	0	0	0	0	0
chr7	90339129	90419967	CDK14	.	0	0	0	0	0
chr7	75189035	75190705	HIP1	.	0	0	0	0	0
chr7	44423664	44424743	NUDCD3	.	0	0	0	0	0
chr7	23454866	23458443	IGF2BP3	.	0	0	0	0	0
chr7	148771477	148777809	ZNF786	.	0	0	0	0	0
chr7	14613836	14712652	DGKB	.	0	0	0	0	0
chr7	133002037	133041327	EXOC4	.	0	0	0	0	0
chr7	132973675	133059756	EXOC4	.	0	0	0	0	0
chr7	105131986	105135700	PUS7	.	0	0	0	0	0
chr7	105098208	105108910	PUS7	.	0	0	0	0	0
chr6	86227473	86253478	SNX14	.	0	0	0	0	0
chr6	79770194	79773627	PHIP	.	0	0	0	0	0
chr6	71464682	71508440	SMAP1	.	0	0	0	0	0
chr6	42630995	42633983	UBR2	.	0	0	0	0	0
chr6	35586872	35588051	FKBP5	.	0	0	0	0	0
chr6	157431605	157454341	ARID1B	.	0	0	0	0	0
chr6	136879937	136883753	MAP3K5	.	0	0	0	0	0
chr6	108248082	108248817	.	SEC63	0	0	0	0	0
chr5	94833119	94845391	TTC37	.	0	0	0	0	0
chr5	78692645	78734972	HOMER1	.	0	0	0	0	0
chr5	77458642	77512061	AP3B1	.	0	0	0	0	0
chr5	77406030	77409747	AP3B1	.	0	0	0	0	0
chr5	53839008	53913760	.	.	0	0	0	0	0
chr5	40764615	40777688	PRKAA1	.	0	0	0	0	0
chr5	39002636	39030674	RICTOR	.	0	0	0	0	0
chr5	139889221	139889766	ANKHD1	.	0	0	0	0	0
chr5	139876104	139889766	ANKHD1	.	0	0	0	0	0
chr5	100222046	100222304	ST8SIA4	.	0	0	0	0	0
chr4	88957371	88987031	PKD2	.	0	0	0	0	0
chr4	42505466	42546003	ATP8A1	.	0	0	0	0	0
chr4	42236178	42253245	.	.	0	0	0	0	0
chr4	40892380	40895428	APBB2	.	0	0	0	0	0
chr4	39306433	39308324	RFC1	KLHL5	0	0	0	0	0
chr4	3101000	3190820	HTT	.	0	0	0	0	0
chr4	186111296	186112366	CFAP97	.	0	0	0	0	0
chr4	148886174	148944564	ARHGAP10	.	0	0	0	0	0
chr4	140255327	140262223	NAA15	.	0	0	0	0	0
chr4	121675707	121732604	PRDM5	.	0	0	0	0	0
chr3	62136776	62142898	PTPRG	.	0	0	0	0	0
chr3	50106122	50107985	RBM6	.	0	0	0	0	0
chr3	44816745	44828066	KIF15	.	0	0	0	0	0
chr3	31474128	31477474	.	.	0	0	0	0	0
chr3	195605123	195615477	TNK2	.	0	0	0	0	0
chr3	195533238	195533389	MUC4	.	0	0	0	0	0
chr3	171944660	171965566	FNDC3B	.	0	0	0	0	0
chr3	167217940	167254788	WDR49	.	0	0	0	0	0
chr3	158399783	158409437	GFM1	.	0	0	0	0	0
chr3	158376710	158399946	GFM1	LXN	0	0	0	0	0
chr3	129579782	129599402	TMCC1	.	0	0	0	0	0
chr3	129557740	129599402	TMCC1	.	0	0	0	0	0
chr3	124456414	124459046	UMPS	.	0	0	0	0	0
chr3	121448034	121449820	GOLGB1	.	0	0	0	0	0
chr2	99135426	99193606	INPP4A	.	0	0	0	0	0
chr2	38795340	38818790	HNRNPLL	.	0	0	0	0	0
chr2	32602655	32605358	BIRC6	.	0	0	0	0	0
chr22	47274548	47290742	TBC1D22A	.	0	0	0	0	0
chr22	43203078	43206950	ARFGAP3	.	0	0	0	0	0
chr22	42262834	42281015	SREBF2	.	0	0	0	0	0
chr2	24181170	24199945	UBXN2A	.	0	0	0	0	0
chr2	24103508	24108699	ATAD2B	.	0	0	0	0	0
chr2	240944626	240961757	NDUFA10	.	0	0	0	0	0
chr2	24021007	24046439	ATAD2B	.	0	0	0	0	0
chr2	239090705	239098613	ILKAP	.	0	0	0	0	0
chr2	228004876	228012300	COL4A4	.	0	0	0	0	0
chr22	24734353	24743144	SPECC1L	.	0	0	0	0	0
chr2	207395608	207414884	ADAM23	.	0	0	0	0	0
chr2	206997668	207009750	NDUFS1	.	0	0	0	0	0
chr2	203997780	204001497	NBEAL1	.	0	0	0	0	0
chr2	202144826	202145194	CASP8	.	0	0	0	0	0
chr2	191765289	191769893	GLS	.	0	0	0	0	0
chr2	178284996	178310354	AGPS	.	0	0	0	0	0
chr2	173377061	173377246	.	.	0	0	0	0	0
chr21	47801608	47811291	PCNT	.	0	0	0	0	0
chr21	45945048	45945207	.	TSPEAR	0	0	0	0	0
chr2	136505836	136530117	UBXN4	.	0	0	0	0	0
chr2	128481906	128484351	WDR33	.	0	0	0	0	0
chr20	3888572	3897697	PANK2	.	0	0	0	0	0
chr20	34430494	34519366	PHF20	.	0	0	0	0	0
chr19	8533657	8539128	HNRNPM	.	0	0	0	0	0
chr19	4422562	4498912	.	UBXN6	0	0	0	0	0
chr19	39866289	39869229	SAMD4B	.	0	0	0	0	0
chr19	1611702	1615820	TCF3	.	0	0	0	0	0
chr19	11240188	11242471	LDLR	.	0	0	0	0	0
chr19	10396113	10396344	.	ICAM1	0	0	0	0	0
chr18	9195548	9235907	ANKRD12	.	0	0	0	0	0
chr18	9195548	9216898	ANKRD12	.	0	0	0	0	0
chr18	67718646	67727278	RTTN	.	0	0	0	0	0
chr1	8555122	8617582	RERE	.	0	0	0	0	0
chr18	53763305	53770066	.	LINC01539	0	0	0	0	0
chr18	45415391	45423180	SMAD2	.	0	0	0	0	0
chr18	40922901	40923052	.	.	0	0	0	0	0
chr18	18588019	18600200	ROCK1	.	0	0	0	0	0
chr18	18586311	18608896	ROCK1	.	0	0	0	0	0
chr1	78181426	78191447	USP33	.	0	0	0	0	0
chr1	78063379	78107340	ZZZ3	.	0	0	0	0	0
chr17	54978779	54985924	TRIM25	.	0	0	0	0	0
chr17	47778002	47778872	SLC35B1	.	0	0	0	0	0
chr17	19839598	19861884	AKAP10	.	0	0	0	0	0
chr17	17158172	17165420	COPS3	.	0	0	0	0	0
chr17	13796041	13861594	.	.	0	0	0	0	0
chr1	70761812	70771973	ANKRD13C	.	0	0	0	0	0
chr16	69402278	69406258	TERF2	.	0	0	0	0	0
chr16	68321648	68331379	SLC7A6	.	0	0	0	0	0
chr16	66756455	66756704	DYNC1LI2	.	0	0	0	0	0
chr1	65095037	65107652	CACHD1	.	0	0	0	0	0
chr16	1837637	1838036	.	NUBP2	0	0	0	0	0
chr16	11778020	11781822	TXNDC11	.	0	0	0	0	0
chr15	93480747	93482948	CHD2	.	0	0	0	0	0
chr15	90760670	90763123	SEMA4B	.	0	0	0	0	0
chr15	66169669	66170293	RAB11A	.	0	0	0	0	0
chr15	65994642	65995346	DENND4A	.	0	0	0	0	0
chr15	49303927	49320879	SECISBP2L	.	0	0	0	0	0
chr15	44898222	44912601	SPG11	.	0	0	0	0	0
chr15	42850395	42853068	HAUS2	.	0	0	0	0	0
chr15	41044734	41045977	.	RMDN3	0	0	0	0	0
chr14	93182480	93183806	LGMN	.	0	0	0	0	0
chr14	89220855	89221015	EML5	.	0	0	0	0	0
chr14	81297486	81382906	CEP128	.	0	0	0	0	0
chr14	78390799	78399987	ADCK1	.	0	0	0	0	0
chr14	71116061	71116518	.	TTC9	0	0	0	0	0
chr14	53464387	53469399	.	.	0	0	0	0	0
chr14	51208299	51211083	NIN	.	0	0	0	0	0
chr14	45475210	45495075	FAM179B	.	0	0	0	0	0
chr1	41448949	41463198	CTPS1	.	0	0	0	0	0
chr14	103148231	103180954	RCOR1	.	0	0	0	0	0
chr1	40672955	40673957	RLF	.	0	0	0	0	0
chr13	95768175	95822882	ABCC4	.	0	0	0	0	0
chr13	73333610	73349513	DIS3	.	0	0	0	0	0
chr13	61013821	61109367	TDRD3	.	0	0	0	0	0
chr13	52971366	52976829	THSD1	.	0	0	0	0	0
chr13	49741379	49752790	FNDC3A	.	0	0	0	0	0
chr13	45978461	45983209	SLC25A30	.	0	0	0	0	0
chr13	26535712	26542817	ATP8A2	.	0	0	0	0	0
chr13	103309405	103317286	TPP2	.	0	0	0	0	0
chr1	29010094	29023596	GMEB1	.	0	0	0	0	0
chr12	72017139	72018072	ZFC3H1	.	0	0	0	0	0
chr12	69962784	69965214	FRS2	.	0	0	0	0	0
chr12	69218142	69222729	MDM2	.	0	0	0	0	0
chr12	58089562	58109753	OS9	.	0	0	0	0	0
chr12	53800368	53803345	SP1	.	0	0	0	0	0
chr12	49918464	49921496	SPATS2	.	0	0	0	0	0
chr12	4626226	4634749	C12orf4	.	0	0	0	0	0
chr12	4219087	4219400	.	.	0	0	0	0	0
chr1	233321276	233322241	PCNX2	.	0	0	0	0	0
chr12	32133811	32145683	KIAA1551	.	0	0	0	0	0
chr12	30783593	30789991	IPO8	.	0	0	0	0	0
chr1	227300012	227300614	CDC42BPA	.	0	0	0	0	0
chr12	23206924	23210831	.	.	0	0	0	0	0
chr12	123281853	123290842	CCDC62	.	0	0	0	0	0
chr12	123262037	123265877	CCDC62	.	0	0	0	0	0
chr12	12022357	12022903	ETV6	.	0	0	0	0	0
chr12	112403398	112441667	TMEM116	.	0	0	0	0	0
chr12	112096539	112117144	BRAP	.	0	0	0	0	0
chr12	101750331	101759403	UTP20	.	0	0	0	0	0
chr12	101750331	101755838	UTP20	.	0	0	0	0	0
chr11	98925446	98939775	.	CNTN5	0	0	0	0	0
chr11	94163076	94189504	MRE11A	.	0	0	0	0	0
chr1	193456519	193457178	.	.	0	0	0	0	0
chr1	183469391	183471526	SMG7	.	0	0	0	0	0
chr1	178846632	178855255	RALGPS2	.	0	0	0	0	0
chr11	77043774	77064644	PAK1	.	0	0	0	0	0
chr1	174363132	174384995	RABGAP1L	.	0	0	0	0	0
chr1	173915613	173921276	RC3H1	.	0	0	0	0	0
chr11	72548575	72552004	FCHSD2	.	0	0	0	0	0
chr1	167661528	167663539	RCSD1	.	0	0	0	0	0
chr1	154420600	154427057	IL6R	.	0	0	0	0	0
chr1	154150658	154151010	TPM3	.	0	0	0	0	0
chr1	153916815	153917273	.	DENND4B	0	0	0	0	0
chr11	35226058	35232996	CD44	.	0	0	0	0	0
chr11	35211544	35250895	.	CD44	0	0	0	0	0
chr11	34104501	34107766	CAPRIN1	.	0	0	0	0	0
chr1	117948170	117957453	MAN1A2	.	0	0	0	0	0
chr11	118454523	118461221	ARCN1	.	0	0	0	0	0
chr11	111558724	111593480	SIK2	.	0	0	0	0	0
chr11	107224249	107300177	CWF19L2	.	0	0	0	0	0
chr11	103173821	103229087	DYNC2H1	.	0	0	0	0	0
chr11	102953476	102954055	DCUN1D5	.	0	0	0	0	0
chr10	35477127	35495979	CREM	.	0	0	0	0	0
chr10	34540529	34542583	PARD3	.	0	0	0	0	0
chr10	27821435	27822923	RAB18	.	0	0	0	0	0
chr10	14896123	14897942	HSPA14	.	0	0	0	0	0
chr10	1296102	1296224	.	ADARB2	0	0	0	0	0
chr10	12159671	12162266	DHTKD1	.	0	0	0	0	0
chr10	104859682	104866463	NT5C2	.	0	0	0	0	0
chr10	104120778	104125356	GBF1	.	0	0	0	0	0
chr10	103699619	103717489	C10orf76	.	0	0	0	0	0
chr8	107691437	107705105	OXR1	.	20	362	65	0.0934579	0.584868
chr8	80963761	80976828	TPD52	.	6	174	806	0.0122324	0.175461
chr9	4860124	4860901	RCL1	.	4	51	2	0.148148	0.116974
chr18	12999419	13042333	CEP192	.	4	4	80	0.0941176	0.116974
chr7	156619298	156629579	LMBR1	.	8	5	4	1.6	0.233947
chr1	162535801	162538176	UAP1	.	8	1690	2	0.00945068	0.233947
chr8	42819453	42829337	HOOK3	.	9	174	47	0.0810811	0.263191
chr3	143704384	143708679	C3orf58	.	10	10	0	1.81818	0.292434
chr4	75040222	75067087	MTHFD2L	.	2	3	22	0.153846	0.0584868
chr3	71739160	71748859	EIF4E3	.	13	14	13	0.928571	0.380165
chr19	50838315	50862904	.	.	0	0	0	0	0
chr4	129857809	129891623	SCLT1	.	4	17	52	0.114286	0.116974
chr12	109046047	109048186	CORO1C	.	4	21	4	0.307692	0.116974
chr3	121563299	121591635	EAF2	.	6	53	187	0.0497925	0.175461
chr2	170401230	170413807	FASTKD1	.	5	62	145	0.0480769	0.146217
chr11	108186549	108206688	ATM	.	4	99	9	0.0733945	0.116974
chr2	200233327	200246543	SATB2	.	3	9	64	0.0810811	0.0877303
chr1	35846859	35855699	ZMYM4	.	0	0	0	0	0
chr8	98725889	98731417	MTDH	.	8	1988	4178	0.00259445	0.233947
chr16	68308593	68309152	SLC7A6	.	5	12	103	0.0862069	0.146217
chr20	47895640	47897501	ZFAS1	.	12	340	107	0.0535714	0.350921
chr11	118425173	118430579	IFT46	.	4	155	59	0.0372093	0.116974
chr11	93523739	93527201	MED17	.	2	247	102	0.0114286	0.0584868
chr20	40141484	40143591	CHD6	.	3	26	104	0.0458015	0.0877303
chr14	23395341	23396869	PRMT5	.	0	0	0	0	0
chr6	146209155	146216113	SHPRH	.	3	44	30	0.08	0.0877303
chr5	154330380	154346797	MRPL22	.	0	0	0	0	0
chr3	27420739	27465643	SLC4A7	.	5	12	29	0.238095	0.146217
chr7	24663284	24720139	MPP6	.	0	0	0	0	0
chr2	206992520	206994966	NDUFS1	.	2	160	111	0.0147059	0.0584868
chr20	43600718	43623898	STK4	.	0	0	0	0	0
chr1	6867042	6885270	CAMTA1	.	8	0	20	0.761905	0.233947
chr5	176636636	176639196	NSD1	.	7	17	29	0.297872	0.204704
chr10	70547683	70548085	CCAR1	.	0	0	0	0	0
chr11	108046972	108047817	NPAT	.	0	0	0	0	0
chr7	23015828	23030758	FAM126A	.	3	25	15	0.146341	0.0877303
chr9	86293355	86301070	UBQLN1	.	3	74	28	0.0582524	0.0877303
chr4	38091552	38104778	TBC1D1	.	5	25	43	0.144928	0.146217
chr6	76331247	76344527	SENP6	.	4	49	18	0.117647	0.116974
chr11	34111725	34113603	CAPRIN1	.	0	0	0	0	0
chr14	100847246	100848083	WDR25	.	2	0	0	4	0.0584868
chr2	45773870	45780869	SRBD1	.	0	0	0	0	0
chr15	87949593	87965267	.	.	2	25	6	0.125	0.0584868
chr1	150464886	150470223	TARS2	.	2	39	69	0.0366972	0.0584868
chrX	134679347	134686071	INTS6L	.	0	0	0	0	0
chr12	1399017	1481143	ERC1	.	0	0	0	0	0
chr5	64824278	64825026	CENPK	.	4	6	34	0.195122	0.116974
chr6	7176887	7189555	RREB1	.	3	49	8	0.103448	0.0877303
chr3	167754623	167759262	GOLIM4	.	3	163	161	0.0184615	0.0877303
chr9	88200377	88248289	AGTPBP1	.	3	44	25	0.0857143	0.0877303
chr17	45695715	45696530	NPEPPS	.	2	8	3	0.333333	0.0584868
chr1	33760537	33760906	ZNF362	.	2	14	7	0.181818	0.0584868
chr7	8257934	8275635	ICA1	.	5	10	9	0.5	0.146217
chr17	35936438	35945538	SYNRG	.	10	4	70	0.266667	0.292434
chr12	121220457	121222396	SPPL3	.	0	0	0	0	0
chr18	72342922	72353078	ZNF407	.	4	5	8	0.571429	0.116974
chr11	117109316	117110576	RNF214	.	3	41	54	0.0625	0.0877303
chr7	158580694	158591763	ESYT2	.	6	28	7	0.333333	0.175461
chr21	46538478	46554747	ADARB1	.	4	2	46	0.163265	0.116974
chr5	127474288	127488497	SLC12A2	.	0	0	0	0	0
chr12	112096539	112097149	BRAP	.	4	178	49	0.0350877	0.116974
chr9	112898406	112900819	PALM2	.	2	12	181	0.0206186	0.0584868
chr3	120469369	120469847	GTF2E1	.	0	0	0	0	0
chr2	97024782	97026448	NCAPH	.	5	88	95	0.0543478	0.146217
chr11	47774467	47776216	FNBP4	.	5	44	37	0.121951	0.146217
chr8	42862989	42873637	HOOK3	.	4	32	0	0.242424	0.116974
chr2	240929490	240961757	NDUFA10	.	4	64	79	0.0555556	0.116974
chr1	23356961	23377013	KDM1A	.	0	0	0	0	0
chr15	73052747	73067438	ADPGK	.	0	0	0	0	0
chr8	42819453	42841938	HOOK3	.	2	174	365	0.00740741	0.0584868
chr2	73315177	73316443	RAB11FIP5	.	8	0	13	1.14286	0.233947
chr2	170411633	170413807	FASTKD1	.	0	0	0	0	0
chr10	225933	267296	ZMYND11	.	0	0	0	0	0
chr4	32147674	32159703	LOC102723828	.	4	1	1	2.66667	0.116974
chr8	41905895	41907225	KAT6A	.	0	0	0	0	0
chr6	73016960	73043538	RIMS1	.	2	7	0	0.5	0.0584868
chr20	46385932	46386207	SULF2	.	0	0	0	0	0
chr9	110062421	110074018	RAD23B	.	0	0	0	0	0
chr9	134305476	134308181	PRRC2B	.	3	8	25	0.176471	0.0877303
chr17	19861326	19861884	AKAP10	.	0	0	0	0	0
chr16	19717913	19722762	KNOP1	.	0	0	0	0	0
chr14	81362061	81382906	CEP128	.	8	97	92	0.0842105	0.233947
chr13	31204971	31205611	USPL1	.	2	44	18	0.0634921	0.0584868
chr12	5269472	5281055	.	.	6	5	0	2	0.175461
chr11	120310837	120317794	ARHGEF12	.	3	411	609	0.00587659	0.0877303
chr8	29959413	29962002	LEPROTL1	MIR548O2	2	17	47	0.0615385	0.0584868
chr4	52729602	52758017	DCUN1D4	.	0	0	0	0	0
chr14	66028054	66028484	FUT8	.	3	0	42	0.139535	0.0877303
chr20	45874751	45875261	ZMYND8	.	0	0	0	0	0
chr3	196831773	196846401	DLG1	.	4	188	61	0.032	0.116974
chr2	48049356	48050499	FBXO11	.	8	48	24	0.219178	0.233947
chr18	42281139	42287187	SETBP1	.	4	7	12	0.4	0.116974
chr17	57430575	57430887	YPEL2	.	2	1	0	2	0.0584868
chr6	45399599	45405788	RUNX2	.	0	0	0	0	0
chr19	18650180	18650530	FKBP8	.	0	0	0	0	0
chr11	107965117	107966418	CUL5	.	0	0	0	0	0
chr6	13639794	13644961	RANBP9	.	0	0	0	0	0
chr5	122881110	122911657	CSNK1G3	.	4	19	64	0.0952381	0.116974
chr1	180366650	180382606	ACBD6	.	8	2	81	0.190476	0.233947
chr3	138289159	138290198	CEP70	.	5	55	17	0.136986	0.146217
chr6	7303782	7310262	SSR1	.	3	230	1050	0.00468384	0.0877303
chr7	91842508	91855996	KRIT1	.	2	17	75	0.0430108	0.0584868
chr15	63845913	63855207	USP3	.	2	33	3	0.108108	0.0584868
chr12	69222550	69233581	MDM2	.	0	0	0	0	0
chr12	105321750	105322472	SLC41A2	.	0	0	0	0	0
chr1	151288048	151288985	PI4KB	.	0	0	0	0	0
chr15	75219106	75221573	COX5A	.	0	0	0	0	0
chr18	48450467	48458730	ME2	.	0	0	0	0	0
chr7	24659670	24690331	MPP6	.	0	0	0	0	0
chr12	111947352	111948386	ATXN2	.	4	34	6	0.195122	0.116974
chr18	9208654	9221997	ANKRD12	.	0	0	0	0	0
chr12	12397195	12397589	LRP6	.	0	0	0	0	0
chr10	7262372	7327916	SFMBT2	.	0	0	0	0	0
chrX	53430497	53430825	SMC1A	.	4	130	95	0.0353982	0.116974
chr8	18656804	18662408	PSD3	.	7	3	12	0.875	0.204704
chr7	35707043	35712888	HERPUD2	.	0	0	0	0	0
chr5	75884730	75886411	IQGAP2	.	0	0	0	0	0
chr4	25848915	25849486	SEL1L3	.	0	0	0	0	0
chr12	31595708	31600703	DENND5B	.	0	0	0	0	0
chr11	13435076	13443385	BTBD10	.	4	17	61	0.101266	0.116974
chr6	35280078	35280549	DEF6	.	3	29	44	0.0810811	0.0877303
chr19	17212469	17213367	MYO9B	.	2	7	12	0.2	0.0584868
chr17	76000250	76027923	TNRC6C	.	6	2	6	1.33333	0.175461
chr3	3178943	3182332	TRNT1	.	0	0	0	0	0
chr18	74090809	74092259	ZNF516	.	0	0	0	0	0
chr19	49416267	49416821	NUCB1	NUCB1-AS1	2	381	136	0.00772201	0.0584868
chr8	68015271	68049838	CSPP1	.	7	35	46	0.170732	0.204704
chr20	32996456	33001685	ITCH	.	4	325	329	0.0122137	0.116974
chr1	9991948	9995685	LZIC	.	0	0	0	0	0
chrX	149761066	149787612	MTM1	.	3	12	29	0.142857	0.0877303
chr9	35231116	35243361	UNC13B	.	3	1	40	0.142857	0.0877303
chr2	233651863	233660935	GIGYF2	.	3	0	0	6	0.0877303
chr13	41515056	41518061	ELF1	.	3	15	125	0.0425532	0.0877303
chr4	25315667	25317022	ZCCHC4	.	4	11	22	0.235294	0.116974
chr5	153413350	153414527	FAM114A2	.	0	0	0	0	0
chr12	49890615	49893988	SPATS2	.	0	0	0	0	0
chr3	170077486	170109048	SKIL	.	0	0	0	0	0
chr11	108172374	108175579	ATM	.	4	99	24	0.0645161	0.116974
chr11	85685750	85742653	PICALM	.	0	0	0	0	0
chr10	35349801	35360267	CUL2	.	0	0	0	0	0
chr2	24357988	24369956	FAM228B	.	0	0	0	0	0
chr5	72370568	72373320	FCHO2	.	6	8	2	1.09091	0.175461
chr5	10213602	10227759	.	.	0	0	0	0	0
chr4	153391092	153403825	FBXW7	.	0	0	0	0	0
chr22	38933596	38964294	DMC1	.	3	9	3	0.461538	0.0877303
chr17	37933903	37949186	IKZF3	.	0	0	0	0	0
chr13	42385360	42393522	VWA8	.	2	2	50	0.0754717	0.0584868
chr1	184675776	184681011	EDEM3	.	0	0	0	0	0
chr11	34978930	35013926	PDHX	.	0	0	0	0	0
chr2	53941520	53943880	ASB3	.	2	91	18	0.0363636	0.0584868
chr20	47708582	47711500	CSE1L	.	0	0	0	0	0
chr4	1902352	1941505	WHSC1	.	3	9	142	0.0394737	0.0877303
chr19	3660963	3661999	PIP5K1C	.	3	10	4	0.4	0.0877303
chrX	24190831	24197887	ZFX	.	0	0	0	0	0
chr8	42761315	42805598	HOOK3	.	2	101	39	0.0283688	0.0584868
chr6	109232101	109286343	ARMC2	ARMC2-AS1	0	0	0	0	0
chr5	70888752	70900295	MCCC2	.	0	0	0	0	0
chr5	6623326	6625782	NSUN2	.	0	0	0	0	0
chr4	48686689	48689177	FRYL	.	0	0	0	0	0
chr2	111406810	111419418	BUB1	.	0	0	0	0	0
chr20	47895640	47897107	ZFAS1	.	10	340	232	0.034904	0.292434
chr14	96807858	96813678	ATG2B	.	0	0	0	0	0
chr11	85718584	85742653	PICALM	.	0	0	0	0	0
chr1	175070268	175070406	.	TNN	0	0	0	0	0
chr15	66727364	66729230	MAP2K1	.	5	52	70	0.0813008	0.146217
chr9	79952170	79986065	VPS13A	.	0	0	0	0	0
chr12	62864480	62895478	MON2	.	2	7	18	0.153846	0.0584868
chr6	90087389	90097309	RRAGD	.	0	0	0	0	0
chr11	17190223	17191353	PIK3C2A	.	3	33	86	0.05	0.0877303
chr2	215609790	215661841	BARD1	.	4	35	4	0.2	0.116974
chr10	27453992	27454468	MASTL	.	0	0	0	0	0
chr10	116879948	116925405	ATRNL1	.	2	14	50	0.0615385	0.0584868
chr4	37633006	37640126	RELL1	.	0	0	0	0	0
chr1	47761436	47767420	STIL	.	0	0	0	0	0
chr7	104678572	104681470	KMT2E	.	0	0	0	0	0
chr4	77045801	77065626	NUP54	.	0	0	0	0	0
chr8	56854413	56866543	LYN	.	3	67	17	0.0705882	0.0877303
chr22	37328806	37330036	CSF2RB	.	0	0	0	0	0
chr11	120318582	120338017	ARHGEF12	.	0	0	0	0	0
chr3	71739160	71759635	EIF4E3	.	0	0	0	0	0
chr3	47139444	47147610	SETD2	.	2	9	15	0.16	0.0584868
chr14	102506572	102507010	DYNC1H1	.	5	31	35	0.149254	0.146217
chr10	17746429	17747740	STAM	.	4	51	38	0.0888889	0.116974
chr18	59739905	59763183	PIGN	.	3	2	5	0.75	0.0877303
chr12	14576842	14578407	ATF7IP	.	0	0	0	0	0
chr17	49294694	49302570	MBTD1	.	0	0	0	0	0
chr18	48573289	48593557	SMAD4	.	0	0	0	0	0
chr8	101276261	101300495	RNF19A	.	8	164	47	0.0754717	0.233947
chr6	170626457	170639638	FAM120B	.	4	3	2	1.33333	0.116974
chr16	53472927	53481018	RBL2	.	0	0	0	0	0
chr16	4516153	4519466	NMRAL1	.	0	0	0	0	0
chr9	77611362	77632364	CARNMT1	C9orf41-AS1	0	0	0	0	0
chr8	80830212	80831383	.	.	0	0	0	0	0
chr6	90556280	90566918	CASP8AP2	.	0	0	0	0	0
chr6	57058639	57075243	RAB23	.	0	0	0	0	0
chr5	109117096	109125228	MAN2A1	.	4	348	113	0.017316	0.116974
chr4	159634270	159636836	PPID	.	3	115	213	0.0182371	0.0877303
chr20	34309661	34320057	RBM39	.	0	0	0	0	0
chr18	48422178	48466756	ME2	.	0	0	0	0	0
chr11	61205096	61205585	SDHAF2	.	0	0	0	0	0
chr10	7405839	7423911	SFMBT2	.	6	0	21	0.545455	0.175461
chr3	122156016	122160963	KPNA1	LOC102723582	0	0	0	0	0
chr4	108603170	108622441	PAPSS1	.	0	0	0	0	0
chr22	34157357	34161940	LARGE	.	0	0	0	0	0
chr8	101271334	101277013	RNF19A	.	0	0	0	0	0
chr8	68024206	68031056	CSPP1	.	2	65	28	0.0425532	0.0584868
chr11	82560090	82571159	PRCP	.	2	6	22	0.137931	0.0584868
chr4	187627716	187630999	FAT1	.	0	0	0	0	0
chr1	78183551	78191447	USP33	.	0	0	0	0	0
chr12	95887831	95889874	METAP2	.	5	261	181	0.0225734	0.146217
chr9	134518625	134526336	RAPGEF1	.	6	19	9	0.413793	0.175461
chr9	134381500	134381840	POMT1	.	0	0	0	0	0
chr7	80418621	80440017	SEMA3C	.	2	10	3	0.285714	0.0584868
chr7	22347957	22357656	RAPGEF5	.	0	0	0	0	0
chr4	54292038	54294350	FIP1L1	.	0	0	0	0	0
chr2	70451685	70463307	TIA1	.	3	42	53	0.0625	0.0877303
chr2	113057425	113082774	ZC3H6	.	0	0	0	0	0
chr20	40161688	40179999	CHD6	.	0	0	0	0	0
chr18	34643483	34647508	KIAA1328	.	3	1	19	0.285714	0.0877303
chr1	76205664	76216231	ACADM	DLSTP1	0	0	0	0	0
chr17	15974722	15976883	NCOR1	.	3	48	113	0.037037	0.0877303
chr14	97312431	97327072	VRK1	.	2	9	258	0.0149254	0.0584868
chr14	81302548	81307112	CEP128	.	4	230	205	0.0183486	0.116974
chr1	155695172	155695810	DAP3	.	0	0	0	0	0
chr1	145592632	145595220	POLR3C	NBPF20	5	0	30	0.322581	0.146217
chr1	117944807	118009049	MAN1A2	.	0	0	0	0	0
chr10	111667448	111674857	XPNPEP1	.	2	38	32	0.056338	0.0584868
chr20	46252654	46256767	NCOA3	.	3	220	53	0.0218978	0.0877303
chr18	2732262	2747645	SMCHD1	.	6	157	555	0.0168303	0.175461
chr1	153637695	153641033	ILF2	.	0	0	0	0	0
chr5	64084777	64100213	CWC27	.	0	0	0	0	0
chr11	118453893	118455359	ARCN1	.	0	0	0	0	0
chr12	117423010	117426674	FBXW8	LOC100506551	5	20	0	0.47619	0.146217
chrX	151804335	151809756	.	GABRQ	2	2	0	1.33333	0.0584868
chr8	42761315	42814457	HOOK3	.	0	0	0	0	0
chr6	43492208	43494485	XPO5	POLR1C	6	138	13	0.0789474	0.175461
chr4	77065301	77065626	NUP54	.	2	31	31	0.0634921	0.0584868
chr2	210962809	211019335	KANSL1L	.	2	2	2	0.8	0.0584868
chr2	109945679	109964405	SH3RF3	.	3	0	10	0.545455	0.0877303
chr18	76856475	76886375	ATP9B	.	2	3	4	0.5	0.0584868
chr16	18851019	18853776	SMG1	.	0	0	0	0	0
chr15	63821212	63829355	USP3	.	0	0	0	0	0
chr14	66082695	66096324	FUT8	.	0	0	0	0	0
chr14	40124048	40125012	.	.	5	1	0	5	0.146217
chr12	4626226	4628046	C12orf4	.	4	63	114	0.0449438	0.116974
chr11	120318582	120340097	ARHGEF12	.	0	0	0	0	0
chr6	44900389	44988369	SUPT3H	.	0	0	0	0	0
chr9	2191265	2192802	SMARCA2	.	0	0	0	0	0
chr19	1218415	1219412	STK11	.	4	147	12	0.05	0.116974
chr16	53175090	53191453	CHD9	.	2	0	15	0.25	0.0584868
chr5	86627164	86633908	RASA1	.	0	0	0	0	0
chr12	122825299	122826244	CLIP1	.	3	25	13	0.153846	0.0877303
chr7	151873275	151875095	KMT2C	.	0	0	0	0	0
chr12	121853961	121855714	RNF34	.	0	0	0	0	0
chr5	74842834	74848416	POLK	.	2	7	18	0.153846	0.0584868
[truncated: 4,369 more rows]

## Sheet: LR+EZH2i
chrom	start	end	sense_gene	antisense_gene	Len +EZH2i junction	SA	SD	Len +EZH2i CTL	Len +EZH2i RPM
chr4	1905942	1936989	WHSC1	.	274	188	869	0.517958	5.48396
chr19	24014398	24016323	.	.	176	67	6	4.75676	3.52254
chr4	153332454	153333681	FBXW7	.	145	79	8	3.29545	2.90209
chr4	1905942	1920350	WHSC1	.	111	188	1385	0.141042	2.2216
chr6	4891946	4892613	CDYL	.	81	32	59	1.76087	1.62117
chr17	37933903	37934020	IKZF3	.	146	197	297	0.589899	2.92211
chr14	81297486	81307112	CEP128	.	26	80	123	0.254902	0.520375
chr18	9182379	9221997	ANKRD12	.	44	15	27	2.04651	0.880635
chr1	117944807	117963271	MAN1A2	.	59	154	43	0.59596	1.18085
chr12	1136913	1137738	ERC1	.	72	122	38	0.89441	1.44104
chr19	23541231	23545527	ZNF91	.	35	1	20	3.18182	0.700505
chr11	33307958	33309057	HIPK3	.	118	19	29	4.81633	2.3617
chr7	139415730	139416814	HIPK2	.	53	118	42	0.658385	1.06077
chr8	52773404	52773806	PCMTD1	.	52	187	30	0.477064	1.04075
chr14	23378691	23380612	RBM23	.	39	144	295	0.177273	0.780563
chr4	144464661	144465125	SMARCA5	.	27	275	211	0.110883	0.54039
chr16	30495147	30495584	ITGAL	.	31	371	210	0.106529	0.620448
chr11	130130750	130131824	ZBTB44	.	113	57	15	3.09589	2.26163
chr1	1586822	1650894	CDK11B	MMP23A	42	0	38	2.15385	0.840606
chr14	97299803	97327072	VRK1	.	42	84	239	0.259259	0.840606
chr3	31617887	31621588	STT3B	.	23	486	543	0.0446602	0.460332
chr1	1158623	1159348	SDF4	.	38	95	355	0.168514	0.760549
chr3	56626997	56628056	CCDC66	.	27	21	31	1.01887	0.54039
chr17	80521229	80526077	FOXK2	.	26	33	44	0.666667	0.520375
chr2	72945231	72960247	EXOC6B	.	13	15	23	0.666667	0.260188
chr4	73950965	73958017	ANKRD17	.	28	54	0	1.01818	0.560404
chr11	120345268	120348235	ARHGEF12	.	55	359	396	0.145503	1.10079
chr6	79752559	79770535	PHIP	.	28	216	76	0.191126	0.560404
chr1	155823066	155823597	GON4L	.	35	65	72	0.507246	0.700505
chr7	148543561	148544397	EZH2	.	23	128	5	0.343284	0.460332
chr15	64791491	64792365	ZNF609	.	21	0	3	10.5	0.420303
chr7	99621041	99621930	ZKSCAN1	.	41	15	19	2.34286	0.820592
chr4	87967317	87968746	AFF1	.	23	46	10	0.807018	0.460332
chr1	117944807	117957453	MAN1A2	.	17	154	165	0.10625	0.340245
chr8	42761315	42798588	HOOK3	.	18	172	42	0.167442	0.36026
chr19	13039155	13039661	FARSA	.	39	150	187	0.230769	0.780563
chr22	42915719	42976365	.	SERHL2	50	93	14	0.925926	1.00072
chr14	81209418	81244390	CEP128	.	11	20	54	0.293333	0.220159
chr20	46252654	46262380	NCOA3	.	21	177	95	0.153846	0.420303
chr16	68155889	68160513	NFATC3	.	39	5	86	0.847826	0.780563
chr9	138773478	138774924	CAMSAP1	.	38	88	41	0.584615	0.760549
chr1	155644800	155649303	YY1AP1	.	21	117	53	0.245614	0.420303
chr12	69210591	69218431	MDM2	.	20	771	828	0.025	0.400289
chr5	122881110	122893258	CSNK1G3	.	58	17	101	0.97479	1.16084
chr18	42529845	42533305	SETBP1	.	24	63	146	0.228571	0.480347
chr1	117944807	117948267	MAN1A2	.	18	154	253	0.0882353	0.36026
chr10	70719561	70720005	DDX21	.	17	209	217	0.0796253	0.340245
chr2	200233327	200298237	SATB2	.	44	16	11	3.14286	0.880635
chr10	5836847	5842668	GDI2	.	18	785	599	0.0259928	0.36026
chr18	19345732	19359646	MIB1	.	31	65	81	0.421769	0.620448
chr3	171965322	171969331	FNDC3B	.	35	157	57	0.325581	0.700505
chr4	1905942	1932497	WHSC1	.	11	188	1525	0.0128355	0.220159
chr18	9195548	9221997	ANKRD12	.	11	225	27	0.0869565	0.220159
chr5	109049220	109065214	MAN2A1	.	32	137	92	0.278261	0.640462
chr1	117944807	117984947	MAN1A2	.	12	154	41	0.122449	0.240173
chr2	37543379	37544322	PRKD3	.	12	62	28	0.263736	0.240173
chr11	120343758	120348235	ARHGEF12	.	26	657	396	0.0493359	0.520375
chr16	80718434	80719026	CDYL2	.	12	25	26	0.461538	0.240173
chr12	1399017	1399178	ERC1	.	9	99	50	0.12	0.18013
chr13	49712882	49720071	FNDC3A	.	8	58	88	0.108844	0.160116
chr6	16326624	16328701	ATXN1	.	27	23	21	1.2	0.54039
chr6	87925620	87928449	ZNF292	.	43	10	17	3.07143	0.860621
chr9	114148656	114154104	KIAA0368	.	45	112	191	0.296053	0.90065
chr21	10985044	10998335	.	.	23	8	31	1.15	0.460332
chr20	57014000	57016139	VAPB	.	15	20	64	0.352941	0.300217
chr1	151139409	151139890	TNFAIP8L2	.	7	181	651	0.0168067	0.140101
chr10	91511102	91522592	KIF20B	.	16	94	59	0.207792	0.320231
chr4	1918597	1920350	WHSC1	.	26	2696	1385	0.0127389	0.520375
chr3	157839891	157841780	RSRC1	.	18	86	105	0.1875	0.36026
chr17	45479497	45492285	EFCAB13	.	4	8	0	0.888889	0.0800578
chr3	171969049	172028671	FNDC3B	.	11	451	209	0.0332829	0.220159
chr21	11038727	11058323	BAGE5	.	38	62	10	1.0411	0.760549
chr8	109462051	109462721	EMC2	.	24	416	358	0.0619355	0.480347
chr1	58971731	59004982	OMA1	.	18	40	19	0.6	0.36026
chr10	7285519	7327916	SFMBT2	.	17	11	12	1.41667	0.340245
chr15	41988272	41991357	MGA	.	10	58	76	0.148148	0.200144
chr3	56600621	56601081	CCDC66	.	14	48	16	0.430769	0.280202
chr6	77981056	77983024	.	.	9	0	2	6	0.18013
chr7	155465560	155473602	RBM33	.	27	39	47	0.62069	0.54039
chr12	116668337	116675510	MED13L	.	22	9	39	0.897959	0.440318
chr17	65941524	65972074	BPTF	.	39	22	26	1.59184	0.780563
chr20	30954186	30956926	ASXL1	.	17	61	43	0.32381	0.340245
chr20	43600718	43615937	STK4	.	7	76	96	0.0809249	0.140101
chr11	95546095	95546753	CEP57	.	11	382	420	0.0273973	0.220159
chr9	33971648	33973235	UBAP2	.	13	49	8	0.448276	0.260188
chr8	103372298	103373854	UBR5	.	10	100	74	0.114286	0.200144
chr1	155408117	155429689	ASH1L	.	17	29	85	0.295652	0.340245
chr4	178274461	178274882	NEIL3	.	24	29	40	0.685714	0.480347
chr12	69210591	69222711	MDM2	.	14	771	2866	0.00769654	0.280202
chr3	169863210	169867032	PHC3	.	23	76	96	0.265896	0.460332
chr8	61653817	61655656	CHD7	.	31	36	68	0.590476	0.620448
chr8	109462051	109468159	EMC2	.	15	416	202	0.0484653	0.300217
chr19	33604672	33605325	GPATCH1	.	10	14	42	0.350877	0.200144
chr5	167915606	167921655	RARS	.	13	322	312	0.0409449	0.260188
chr10	126631025	126631876	ZRANB1	.	33	55	33	0.741573	0.660477
chr9	33953282	33963789	UBAP2	.	29	36	49	0.674419	0.580419
chr4	153332454	153391140	FBXW7	.	5	79	0	0.125	0.100072
chrX	139865339	139866824	.	CDR1	21	0	0	42	0.420303
chr4	56277780	56284152	TMEM165	.	17	57	432	0.0693878	0.340245
chr10	5815804	5842668	GDI2	.	7	649	599	0.011209	0.140101
chr13	96409897	96416207	DNAJC3	.	16	103	251	0.0901408	0.320231
chr8	98698895	98703416	MTDH	.	8	2461	2033	0.00355951	0.160116
chr3	17051165	17056403	PLCL2	.	7	8	41	0.28	0.140101
chr19	8520288	8528570	HNRNPM	.	6	102	112	0.055814	0.120087
chr11	120916382	120930794	TBCEL	.	10	24	59	0.238095	0.200144
chr1	146724277	146731572	CHD1L	.	4	69	64	0.0597015	0.0800578
chr15	41961025	41962156	MGA	.	20	25	49	0.533333	0.400289
chr10	15875628	15889942	FAM188A	.	10	72	8	0.246914	0.200144
chr12	124071293	124074996	TMED2	.	10	620	1558	0.00917852	0.200144
chr14	39648294	39648666	PNN	.	0	0	0	0	0
chr15	87949593	87966067	.	.	18	19	5	1.44	0.36026
chr20	33065576	33067594	ITCH	.	12	363	178	0.0442804	0.240173
chr4	39739039	39776553	UBE2K	.	12	57	94	0.157895	0.240173
chr17	37933903	37934263	IKZF3	.	6	197	0	0.0606061	0.120087
chr3	50102463	50103935	RBM6	.	9	50	97	0.121622	0.18013
chr12	46622935	46637097	SLC38A1	.	36	185	259	0.161798	0.72052
chr12	120592773	120593523	GCN1	.	25	72	79	0.328947	0.500361
chr1	31465236	31468067	PUM1	.	9	10	176	0.0962567	0.18013
chr11	72695132	72700142	FCHSD2	.	6	52	59	0.107143	0.120087
chr5	41794104	41807540	OXCT1	.	0	0	0	0	0
chr10	28872327	28884970	WAC	.	4	219	313	0.0150094	0.0800578
chr18	8718421	8720494	MTCL1	.	3	13	45	0.101695	0.0600433
chr12	69222550	69230529	MDM2	.	5	836	555	0.00718391	0.100072
chr7	128655032	128658211	TNPO3	.	30	101	127	0.262009	0.600433
chr17	57808781	57816308	VMP1	.	15	134	80	0.139535	0.300217
chr16	68155889	68157024	NFATC3	.	32	5	40	1.3913	0.640462
chr5	68470703	68471364	CCNB1	.	21	406	382	0.0532319	0.420303
chr10	7318853	7327916	SFMBT2	.	24	16	12	1.65517	0.480347
chr7	99090662	99092254	ZNF394	.	6	0	33	0.352941	0.120087
chr1	155691307	155695810	DAP3	.	15	683	252	0.0320513	0.300217
chr4	48371865	48385801	SLAIN2	.	6	27	41	0.173913	0.120087
chr3	171969049	172016577	FNDC3B	.	10	451	582	0.0193424	0.200144
chr18	44526019	44526886	.	.	5	4	2	1.42857	0.100072
chr11	108098321	108100050	ATM	.	12	93	41	0.177778	0.240173
chr10	102683731	102685776	SLF2	.	6	63	79	0.0839161	0.120087
chr12	69644908	69656342	CPSF6	.	5	185	39	0.0444444	0.100072
chr5	6737622	6746540	PAPD7	.	0	0	0	0	0
chr6	158733082	158735300	TULP4	.	18	13	12	1.38462	0.36026
chr10	5827104	5842668	GDI2	.	0	0	0	0	0
chr5	60768507	60768864	ZSWIM6	.	25	28	51	0.625	0.500361
chr10	105382226	105420872	SH3PXD2A	.	8	15	1	0.941176	0.160116
chr5	109049220	109051965	MAN2A1	.	16	137	173	0.102894	0.320231
chr8	22332466	22333137	PPP3CC	.	5	231	227	0.0217865	0.100072
chr21	46548316	46554747	ADARB1	.	18	47	34	0.439024	0.36026
chr5	137320945	137324004	FAM13B	.	8	13	5	0.842105	0.160116
chr18	19345732	19399607	MIB1	.	3	65	82	0.0405405	0.0600433
chr1	28907071	28907741	SNHG12	.	10	87	38	0.15873	0.200144
chr8	28013458	28019595	ELP3	.	5	273	341	0.0162602	0.100072
chr1	1601102	1666274	CDK11B	MMP23A	5	6	3	1	0.100072
chr12	46319924	46322642	SCAF11	.	10	103	45	0.134228	0.200144
chr22	22160138	22162135	MAPK1	.	9	136	78	0.0837209	0.18013
chr14	99924615	99932150	SETD3	.	30	52	12	0.923077	0.600433
chrX	134679347	134690225	INTS6L	.	12	23	83	0.224299	0.240173
chr20	60714130	60716000	PSMA7	.	18	372	419	0.0454545	0.36026
chr18	9204473	9221997	ANKRD12	.	5	23	27	0.196078	0.100072
chr7	24659670	24708279	MPP6	.	7	0	60	0.229508	0.140101
chr21	30693541	30702014	BACH1	.	7	8	68	0.181818	0.140101
chrX	149962163	149984551	CD99L2	.	12	41	196	0.10084	0.240173
chr2	240929490	240946787	NDUFA10	.	13	170	281	0.0575221	0.260188
chr16	3900297	3901010	CREBBP	.	16	21	37	0.542373	0.320231
chr15	87898779	87966067	.	.	11	13	5	1.15789	0.220159
chr8	98731276	98735263	MTDH	.	0	0	0	0	0
chr14	81209418	81227957	CEP128	.	0	0	0	0	0
chr20	46365446	46386207	SULF2	.	2	185	218	0.00990099	0.0400289
chr1	8601272	8617582	RERE	.	2	12	4	0.235294	0.0400289
chr11	108137897	108138069	ATM	.	8	101	96	0.0808081	0.160116
chr3	196118683	196129890	UBXN7	.	3	21	3	0.24	0.0600433
chr14	23375403	23380612	RBM23	.	9	53	295	0.0515759	0.18013
chr13	49742748	49752790	FNDC3A	.	0	0	0	0	0
chr1	231500072	231503382	EGLN1	.	0	0	0	0	0
chr4	73956383	73958017	ANKRD17	.	25	40	0	1.21951	0.500361
chr1	41536266	41541123	SCMH1	.	18	49	31	0.444444	0.36026
chr1	28362054	28384605	EYA3	.	14	105	313	0.0668258	0.280202
chr19	34921480	34929671	UBA2	.	8	266	158	0.0376471	0.160116
chr7	24663284	24708279	MPP6	.	14	16	60	0.363636	0.280202
chr2	172782046	172809519	HAT1	.	12	192	115	0.0779221	0.240173
chr21	17135209	17138460	USP25	.	6	51	48	0.12	0.120087
chr1	21083658	21100103	HP1BP3	.	9	110	152	0.0684411	0.18013
chr7	151944986	151970952	KMT2C	.	18	19	34	0.666667	0.36026
chr4	129913321	129925031	SCLT1	.	8	55	7	0.253968	0.160116
chr20	30115286	30115853	HM13	.	5	380	2	0.0261097	0.100072
chr2	231307651	231314970	SP100	.	2	94	42	0.0291971	0.0400289
chr11	118454523	118455359	ARCN1	.	7	1394	728	0.00659444	0.140101
chr10	116879948	116889297	ATRNL1	.	17	12	34	0.723404	0.340245
chr9	88920106	88924932	ZCCHC6	.	24	25	140	0.289157	0.480347
chr1	35824525	35827390	ZMYM4	.	14	4	35	0.7	0.280202
chr15	81262802	81274523	MESDC2	.	3	3	284	0.0208333	0.0600433
chr7	148716083	148718239	PDIA4	.	10	324	824	0.0174064	0.200144
chr4	1919867	1920350	WHSC1	.	13	2129	1385	0.00739687	0.260188
chr7	23015828	23023664	FAM126A	.	6	99	96	0.0612245	0.120087
chr1	58971731	59002413	OMA1	.	15	40	74	0.26087	0.300217
chr1	115005725	115007010	TRIM33	.	10	20	26	0.425532	0.200144
chr16	4311779	4312702	TFAP4	.	6	8	79	0.136364	0.120087
chr6	24416624	24418806	MRS2	.	0	0	0	0	0
chr1	247319707	247323115	ZNF124	.	5	0	1	5	0.100072
chr15	41648236	41669502	NUSAP1	.	11	491	242	0.0299728	0.220159
chr15	63988322	64008672	HERC1	.	2	41	21	0.0634921	0.0400289
chr22	21288066	21288532	CRKL	.	16	47	114	0.197531	0.320231
chr18	48444479	48450582	ME2	.	4	971	538	0.00529801	0.0800578
chr2	203419974	203421254	BMPR2	.	4	36	56	0.0860215	0.0800578
chr18	42281139	42339068	SETBP1	.	7	14	4	0.736842	0.140101
chr20	33057852	33069011	ITCH	.	2	189	332	0.00766284	0.0400289
chr6	117010482	117026323	KPNA5	.	5	37	10	0.208333	0.100072
chr7	158552176	158557544	ESYT2	.	2	111	91	0.0197044	0.0400289
chr14	53464387	53510473	.	.	3	2	0	2	0.0600433
chr8	99718694	99719539	STK3	.	3	45	42	0.0681818	0.0600433
chr20	34317233	34320057	RBM39	.	10	110	341	0.0442478	0.200144
chr12	112371689	112381173	TMEM116	.	10	17	30	0.416667	0.200144
chr18	42281139	42281797	SETBP1	.	16	14	67	0.390244	0.320231
chr5	138699447	138700432	PAIP2	.	13	40	538	0.044905	0.260188
chr11	120907213	120930794	TBCEL	.	5	15	59	0.133333	0.100072
chr2	72958135	72960247	EXOC6B	.	3	13	23	0.162162	0.0600433
chr3	31617887	31641951	STT3B	.	4	486	665	0.00694444	0.0800578
chr18	33606862	33613800	RPRD1A	.	9	109	127	0.0759494	0.18013
chr18	45391429	45423180	SMAD2	.	7	62	54	0.119658	0.140101
chr11	76174864	76183884	EMSY	.	4	41	34	0.105263	0.0800578
chr1	65830317	65831879	DNAJC6	.	16	4	31	0.888889	0.320231
chr2	122260742	122287901	CLASP1	.	3	14	63	0.0769231	0.0600433
chr2	173423435	173431661	PDK1	.	13	171	376	0.0474453	0.260188
chr19	19750893	19751380	GMIP	.	5	86	13	0.1	0.100072
chr18	60206913	60217693	ZCCHC2	.	5	4	21	0.384615	0.100072
chr8	27151596	27151827	TRIM35	.	5	4	63	0.147059	0.100072
chrX	134679347	134683730	INTS6L	.	9	23	116	0.128571	0.18013
chr4	2951660	2952972	NOP14	NOP14-AS1	5	189	158	0.0287356	0.100072
chr7	40027197	40027857	CDK13	.	3	26	56	0.0722892	0.0600433
chr10	105197771	105198565	PDCD11	.	5	74	131	0.0485437	0.100072
chr7	99952765	99953427	STAG3L5P-PVRIG2P-PILRB	.	6	39	0	0.3	0.120087
chr20	36685933	36694658	RPRD1B	.	4	22	40	0.126984	0.0800578
chr20	34309661	34313077	RBM39	.	8	163	112	0.057971	0.160116
chrX	19983161	19988416	CXorf23	.	0	0	0	0	0
chr9	6420911	6434173	UHRF2	.	7	19	110	0.107692	0.140101
chrX	48024315	48123352	.	SSX5	0	0	0	0	0
chr6	7181356	7189555	RREB1	.	10	52	12	0.307692	0.200144
chr18	55278868	55283207	NARS	.	4	464	902	0.00585223	0.0800578
chr15	77657504	77681144	PEAK1	.	8	20	2	0.695652	0.160116
chr2	136620176	136622733	MCM6	.	4	97	259	0.022409	0.0800578
chr19	5047486	5082515	KDM4B	.	3	58	15	0.0810811	0.0600433
chr4	76573822	76581054	G3BP2	.	4	433	189	0.0128411	0.0800578
chr12	69983264	69985939	CCT2	.	3	811	952	0.00340136	0.0600433
chr5	32268806	32276848	MTMR12	.	0	0	0	0	0
chr17	4186092	4200109	UBE2G1	.	6	184	338	0.0229446	0.120087
chr1	21295966	21329301	EIF4G3	.	0	0	0	0	0
chr6	5404774	5431405	FARS2	.	0	0	0	0	0
chr4	17816475	17816981	NCAPG	.	6	238	43	0.0425532	0.120087
chr3	98487273	98492827	ST3GAL6	.	0	0	0	0	0
chr6	76344422	76388643	SENP6	.	0	0	0	0	0
chr6	44971389	44988369	SUPT3H	.	0	0	0	0	0
chr11	118656760	118657227	DDX6	.	22	101	81	0.240437	0.440318
chr10	22193450	22209892	DNAJC1	.	21	2401	201	0.0161352	0.420303
chr5	32135677	32143986	GOLPH3	.	6	615	386	0.011976	0.120087
chr6	7899808	7904956	BLOC1S5-TXNDC5	.	17	3420	11622	0.00226019	0.340245
chr22	50810448	50832564	PPP6R2	.	12	38	111	0.16	0.240173
chr1	84376847	84412965	LOC101927587	.	15	66	29	0.3125	0.300217
chr5	65349233	65350779	ERBIN	.	4	118	31	0.0533333	0.0800578
chr10	112356155	112358048	SMC3	.	14	171	68	0.116667	0.280202
chr4	39915230	39927553	PDS5A	.	17	196	206	0.0843672	0.340245
chr12	69214104	69218431	MDM2	.	6	712	828	0.00778715	0.120087
chr6	13579682	13584457	SIRT5	.	8	4	6	1.45455	0.160116
chr11	73418464	73429763	RAB6A	.	16	75	34	0.290909	0.320231
chr2	58449076	58459247	FANCL	.	8	46	23	0.228571	0.160116
chr5	118433673	118450236	DMXL1	.	32	90	45	0.470588	0.640462
chr14	31139461	31144271	SCFD1	.	10	97	187	0.0701754	0.200144
chr5	80071512	80088663	MSH3	.	7	57	66	0.112903	0.140101
chr1	22816372	22818026	ZBTB40	.	4	15	52	0.117647	0.0800578
chr10	22193450	22218070	DNAJC1	.	5	2401	454	0.0035014	0.100072
chr21	30698379	30702014	BACH1	.	7	61	68	0.107692	0.140101
chr17	40650941	40653322	ATP6V0A1	.	7	55	72	0.109375	0.140101
chr3	142455220	142467302	TRPC1	.	14	2	16	1.47368	0.280202
chr3	171969049	172025291	FNDC3B	.	2	451	145	0.00670017	0.0400289
chr18	48450467	48466756	ME2	.	0	0	0	0	0
chr9	20819794	20823114	FOCAD	.	8	76	136	0.0751174	0.160116
chr8	42812236	42819617	HOOK3	.	6	122	341	0.0258621	0.120087
chr2	45773870	45789895	SRBD1	.	0	0	0	0	0
chr2	215609790	215646233	BARD1	.	7	126	130	0.0544747	0.140101
chr3	123649948	123667979	CCDC14	.	3	61	99	0.0372671	0.0600433
chr6	109215669	109225608	ARMC2	.	8	85	118	0.0784314	0.160116
chr6	10703637	10705077	PAK1IP1	.	5	75	44	0.0833333	0.100072
chr7	72873865	72884813	BAZ1B	.	0	0	0	0	0
chr16	87782278	87795646	KLHDC4	.	10	38	27	0.30303	0.200144
chr1	14099572	14109326	PRDM2	.	3	26	5	0.1875	0.0600433
chr17	62130139	62130731	ERN1	.	0	0	0	0	0
chr13	21742126	21742538	SKA3	.	6	21	10	0.375	0.120087
chr14	53558502	53570574	DDHD1	.	6	83	156	0.05	0.120087
chr7	152007050	152012423	KMT2C	.	0	0	0	0	0
chr1	1747194	1756938	GNB1	.	2	189	124	0.0127389	0.0400289
chr16	19627435	19628130	C16orf62	.	0	0	0	0	0
chr10	116590610	116608496	FAM160B1	.	5	10	22	0.30303	0.100072
chr7	104702610	104722244	KMT2E	.	0	0	0	0	0
chr7	129760588	129762042	KLHDC10	.	5	47	78	0.0793651	0.100072
chr6	7904806	7904956	BLOC1S5-TXNDC5	.	0	0	0	0	0
chr5	93978977	93990457	SLF1	.	3	9	35	0.133333	0.0600433
chr9	128099296	128099870	GAPVD1	.	3	10	31	0.142857	0.0600433
chr10	125780771	125806240	CHST15	.	0	0	0	0	0
chr1	155490890	155491409	ASH1L	.	3	63	28	0.0652174	0.0600433
chr4	146744573	146770713	ZNF827	.	0	0	0	0	0
chr12	116674625	116675510	MED13L	.	5	18	39	0.172414	0.100072
chr6	7298155	7299056	SSR1	.	0	0	0	0	0
chr21	34614144	34635942	IFNAR2	.	10	5	4	2	0.200144
chr16	58593707	58594266	CNOT1	.	4	0	72	0.109589	0.0800578
chr4	36230203	36231267	ARAP2	.	0	0	0	0	0
chr1	154207066	154207767	UBAP2L	.	0	0	0	0	0
chr8	28304687	28309883	FBXO16	.	0	0	0	0	0
chr14	80963811	80997230	CEP128	.	46	1	84	1.06977	0.920664
chr17	20107645	20109225	SPECC1	.	27	10	23	1.58824	0.54039
chr8	107691437	107696587	OXR1	.	14	101	984	0.0257827	0.280202
chr12	46633461	46637097	SLC38A1	.	12	403	259	0.0361991	0.240173
chr18	54423813	54426184	WDR7	.	11	82	27	0.2	0.220159
chr2	190656515	190682906	PMS1	.	22	40	78	0.369748	0.440318
chr10	125798030	125806240	CHST15	.	10	72	63	0.147059	0.200144
chr5	102432244	102433485	GIN1	.	8	23	40	0.25	0.160116
chr9	138741982	138758382	CAMSAP1	.	8	24	91	0.137931	0.160116
chr1	155896466	155896947	KIAA0907	.	12	182	276	0.0522876	0.240173
chr11	108098321	108138069	ATM	.	7	93	96	0.0736842	0.140101
chr12	124904502	124915333	NCOR2	.	4	8	52	0.131148	0.0800578
chr20	33057852	33080402	ITCH	.	3	189	253	0.013544	0.0600433
chr4	75040222	75091111	MTHFD2L	.	7	4	5	1.4	0.140101
chr12	70193988	70195501	RAB3IP	.	5	30	27	0.172414	0.100072
chr20	35812582	35812776	RPN2	.	4	708	1317	0.00394867	0.0800578
chr10	112723882	112745523	SHOC2	.	9	14	209	0.0803571	0.18013
chr1	70758070	70781249	ANKRD13C	.	13	115	44	0.1625	0.260188
chr1	67423741	67428843	MIER1	.	3	61	58	0.05	0.0600433
chr7	87593948	87607727	ADAM22	.	13	3	5	2.88889	0.260188
chr5	179136873	179147561	CANX	.	13	1603	992	0.0100154	0.260188
chr1	161071837	161072165	PFDN2	.	11	593	254	0.0259434	0.220159
chr20	45891031	45905539	ZMYND8	.	8	60	66	0.125984	0.160116
chr18	53763305	53764426	.	LINC01539	4	7	0	1	0.0800578
chrX	149983334	149984551	CD99L2	.	7	268	196	0.0301075	0.140101
chr2	200245086	200298237	SATB2	.	5	67	11	0.126582	0.100072
chr2	239090705	239093928	ILKAP	.	11	39	23	0.349206	0.220159
chr15	63824845	63855207	USP3	.	0	0	0	0	0
chr8	42780699	42798588	HOOK3	.	0	0	0	0	0
chr11	8474368	8486369	STK33	.	5	22	64	0.114943	0.100072
chr11	120347369	120348235	ARHGEF12	.	8	0	396	0.0403023	0.160116
chr5	65284462	65290692	ERBIN	.	6	47	37	0.141176	0.120087
chr16	69404385	69406258	TERF2	.	0	0	0	0	0
chr6	74190397	74191967	MTO1	.	9	140	66	0.0869565	0.18013
chr10	31661946	31676195	ZEB1	.	4	3	21	0.32	0.0800578
chr2	215632205	215646233	BARD1	.	10	23	130	0.12987	0.200144
chr1	205585605	205593019	ELK4	.	0	0	0	0	0
chr16	18846213	18856973	SMG1	.	3	22	32	0.109091	0.0600433
chr15	85223943	85234875	SEC11A	.	2	64	255	0.0125	0.0400289
chr9	103082546	103111654	TEX10	.	6	21	11	0.363636	0.120087
chr7	33185853	33217203	BBS9	.	3	10	1	0.5	0.0600433
chr6	10702601	10702872	PAK1IP1	.	6	83	81	0.0727273	0.120087
chr16	48587449	48596355	N4BP1	MIR548AE2	2	45	24	0.0571429	0.0400289
chr5	113740134	113740553	KCNN2	.	8	0	1	8	0.160116
chr17	80521229	80529746	FOXK2	.	4	33	50	0.0952381	0.0800578
chr16	70598967	70601439	SF3B3	.	3	135	194	0.0181818	0.0600433
chrX	90669902	90673870	PABPC5-AS1	.	5	0	0	10	0.100072
chr6	13632601	13644961	RANBP9	NOL7	5	28	3	0.3125	0.100072
chr12	1372199	1399178	ERC1	.	0	0	0	0	0
chr11	32611092	32617593	EIF3M	.	0	0	0	0	0
chr12	80187642	80215970	PPP1R12A	.	0	0	0	0	0
chr5	178312614	178358327	ZFP2	.	8	6	0	2.28571	0.160116
chr8	124349864	124351686	ATAD2	.	5	162	62	0.0444444	0.100072
chr4	103225473	103236987	SLC39A8	.	5	113	64	0.0561798	0.100072
chr19	5653125	5654467	SAFB	.	3	67	63	0.0458015	0.0600433
chr17	40652724	40653322	ATP6V0A1	.	2	31	72	0.0384615	0.0400289
chr9	88211276	88248289	AGTPBP1	.	0	0	0	0	0
chr8	22899553	22900756	TNFRSF10B	.	4	0	41	0.190476	0.0800578
chr20	42331129	42331543	MYBL2	.	4	202	858	0.00754006	0.0800578
chr3	185638891	185641772	TRA2B	.	4	214	986	0.00666112	0.0800578
chr6	52132662	52134024	MCM3	.	0	0	0	0	0
chr1	220179447	220180680	EPRS	RNU5F-1	0	0	0	0	0
chr3	28051960	28070094	.	.	0	0	0	0	0
chr1	35846859	35847359	ZMYM4	.	5	60	23	0.119048	0.100072
chr9	22046749	22097363	CDKN2B-AS1	.	5	14	6	0.47619	0.100072
chr5	179136873	179143295	CANX	.	0	0	0	0	0
chr11	77409531	77413540	RSF1	.	0	0	0	0	0
chr3	141228409	141248644	RASA2	.	0	0	0	0	0
chr15	101104896	101105470	.	.	0	0	0	0	0
chrX	54013510	54014377	PHF8	.	0	0	0	0	0
chr7	127344892	127361454	SND1	.	4	197	397	0.0134454	0.0800578
chr11	85707868	85742653	PICALM	.	2	57	62	0.0333333	0.0400289
chr1	154197559	154209612	UBAP2L	.	4	180	233	0.0193237	0.0800578
chr12	1213915	1250953	ERC1	.	0	0	0	0	0
chr5	171482591	171484477	STK10	.	0	0	0	0	0
chr18	9182379	9216898	ANKRD12	.	0	0	0	0	0
chr7	91924202	91948826	ANKIB1	.	0	0	0	0	0
chr12	121858044	121861320	RNF34	.	0	0	0	0	0
chr1	176524542	176526377	PAPPA2	.	2	0	0	4	0.0400289
chr8	68005777	68024300	CSPP1	.	0	0	0	0	0
chr11	68334481	68343511	PPP6R3	.	0	0	0	0	0
chr17	40880842	40882936	EZH1	.	0	0	0	0	0
chr15	72283443	72302788	MYO9A	.	0	0	0	0	0
chr6	109232101	109258202	ARMC2	ARMC2-AS1	15	127	201	0.0911854	0.300217
chr10	5741487	5756170	FAM208B	.	8	0	56	0.280702	0.160116
chrX	44383247	44386611	FUNDC1	.	9	0	67	0.264706	0.18013
chr1	52959282	52975384	ZCCHC11	.	6	68	80	0.0805369	0.120087
chr6	92045595	92047935	.	.	0	0	0	0	0
chr22	28910744	28915308	TTC28	.	4	0	0	8	0.0800578
chr10	15858833	15889942	FAM188A	.	7	25	8	0.411765	0.140101
chr8	68044185	68049838	CSPP1	.	5	21	90	0.0892857	0.100072
chrX	133607388	133627620	HPRT1	.	6	14	23	0.315789	0.120087
chr5	176370335	176385155	UIMC1	.	16	30	6	0.864865	0.320231
chr10	22171210	22209892	DNAJC1	.	12	125	201	0.0733945	0.240173
chr9	33948371	33953472	UBAP2	.	6	55	45	0.118812	0.120087
chr8	142264087	142264728	SLC45A4	LOC105375787	8	1	0	8	0.160116
chr1	187272597	187298192	LINC01036	.	4	0	24	0.32	0.0800578
chr14	31416295	31425448	STRN3	.	8	165	78	0.0655738	0.160116
chr19	58772216	58775042	ZNF544	.	0	0	0	0	0
chr12	69218142	69222711	MDM2	.	12	1695	2866	0.00526085	0.240173
chr14	81223235	81244390	CEP128	.	11	166	54	0.0995475	0.220159
chr20	34300940	34313077	RBM39	.	11	63	112	0.125	0.220159
chr1	51032748	51061888	FAF1	.	8	142	141	0.056338	0.160116
chr9	103261046	103279053	MSANTD3	.	5	27	6	0.294118	0.100072
chr9	37126308	37147442	ZCCHC7	.	9	33	2	0.5	0.18013
chr2	200213423	200298237	SATB2	.	6	32	11	0.272727	0.120087
chr4	54280781	54294350	FIP1L1	.	11	120	85	0.106796	0.220159
chr3	169889160	169896726	PHC3	.	6	113	36	0.08	0.120087
chr7	127013395	127017383	ZNF800	.	0	0	0	0	0
chr21	37711076	37717005	MORC3	.	8	0	58	0.271186	0.160116
chr20	43607083	43615937	STK4	.	0	0	0	0	0
chrX	135323318	135326954	MAP7D3	.	4	89	200	0.0275862	0.0800578
chr20	47570092	47580435	ARFGEF2	.	4	233	24	0.0310078	0.0800578
chr15	89656955	89659752	ABHD2	.	3	94	102	0.0304569	0.0600433
chr15	49528047	49531564	GALK2	.	4	117	91	0.0382775	0.0800578
chr20	47691321	47707559	CSE1L	.	3	942	831	0.00338219	0.0600433
chr11	116627861	116629123	BUD13	.	9	45	122	0.107143	0.18013
chr17	35310185	35311207	AATF	.	2	150	72	0.0179372	0.0400289
chr13	96636057	96651561	UGGT2	.	0	0	0	0	0
chr19	24014398	24017206	.	.	5	67	1	0.144928	0.100072
chr8	48866179	48869991	PRKDC	.	2	252	42	0.0135593	0.0400289
chr11	117150623	117150975	RNF214	.	0	0	0	0	0
chr17	46189392	46190763	SNX11	.	4	20	8	0.275862	0.0800578
chr3	47651555	47719801	SMARCC1	.	3	48	200	0.0240964	0.0600433
chr15	93543741	93558139	CHD2	.	5	10	15	0.384615	0.100072
chr1	174241551	174274265	RABGAP1L	.	0	0	0	0	0
chrX	79962925	79975155	BRWD3	.	3	51	17	0.0869565	0.0600433
chr5	70798425	70808255	BDP1	.	2	46	58	0.0380952	0.0400289
chr4	178274461	178281831	NEIL3	.	2	29	5	0.114286	0.0400289
chr12	32480394	32481489	BICD1	.	9	2	1	4.5	0.18013
chr10	32740519	32762951	CCDC7	.	0	0	0	0	0
chr10	70404454	70406762	TET1	.	7	1	6	1.75	0.140101
chr5	14673750	14693203	OTULIN	.	6	11	5	0.705882	0.120087
chr2	61118817	61149134	REL	.	4	104	2	0.0747664	0.0800578
chr6	20546576	20548936	CDKAL1	.	0	0	0	0	0
chr1	162535801	162567648	UAP1	.	0	0	0	0	0
chr1	1747194	1770677	GNB1	.	6	189	7	0.0609137	0.120087
chr20	62407030	62422143	ZBTB46	.	0	0	0	0	0
chr10	12123470	12162266	DHTKD1	.	4	5	20	0.307692	0.0800578
chr9	96233422	96261168	FAM120A	.	3	175	19	0.0307692	0.0600433
chr7	23224688	23226765	NUPL2	.	0	0	0	0	0
chr7	104714065	104717880	KMT2E	.	0	0	0	0	0
chr15	73064123	73067438	ADPGK	.	3	121	93	0.027907	0.0600433
chr1	21295966	21307720	EIF4G3	.	7	70	79	0.0933333	0.140101
chr7	117825700	117828459	LSM8	.	4	18	238	0.0311284	0.0800578
chr5	132227855	132228810	AFF4	.	3	29	66	0.0625	0.0600433
chr2	70451685	70457986	TIA1	.	2	90	82	0.0231214	0.0400289
chr17	7402357	7402810	POLR2A	.	0	0	0	0	0
chr14	81405728	81408724	.	.	0	0	0	0	0
chr16	12060051	12061700	TNFRSF17	.	5	1895	33	0.00518403	0.100072
chr7	156956503	156963144	UBE3C	.	0	0	0	0	0
chr4	83795763	83803093	SEC31A	.	4	32	188	0.0361991	0.0800578
chr1	168007608	168037701	DCAF6	.	4	207	128	0.0238095	0.0800578
chr11	34978930	35006275	PDHX	.	3	127	121	0.0240964	0.0600433
chr4	106367539	106377902	PPA2	.	4	394	91	0.0164609	0.0800578
chr18	48444479	48458730	ME2	.	0	0	0	0	0
chr16	88008653	88017865	BANP	.	0	0	0	0	0
chr2	113057425	113089859	ZC3H6	.	0	0	0	0	0
chr2	48061717	48062010	FBXO11	.	0	0	0	0	0
chr10	14938844	14939516	SUV39H2	.	4	60	179	0.0333333	0.0800578
chr8	119388020	119391939	SAMD12	.	4	0	43	0.181818	0.0800578
chr2	85270686	85276771	KCMF1	.	0	0	0	0	0
chr17	29483000	29497015	NF1	.	3	15	7	0.26087	0.0600433
chr14	61275042	61346553	MNAT1	.	0	0	0	0	0
chr14	58785259	58796887	ARID4A	.	0	0	0	0	0
chr13	35883664	35926460	NBEA	.	2	66	68	0.0296296	0.0400289
chr11	118997644	118997835	HINFP	.	0	0	0	0	0
chr9	78682870	78722267	PCSK5	.	0	0	0	0	0
chr10	27431315	27434519	YME1L1	.	0	0	0	0	0
chr1	213037066	213058738	FLVCR1	.	0	0	0	0	0
chr20	49551566	49571822	DPM1	ADNP-AS1	0	0	0	0	0
chr1	97235258	97250810	PTBP2	.	2	11	1	0.307692	0.0400289
chr15	93543741	93552553	CHD2	.	0	0	0	0	0
chr4	10099334	10105610	WDR1	.	3	292	395	0.00872093	0.0600433
chr17	4186092	4210418	UBE2G1	.	0	0	0	0	0
chr8	98698895	98735263	MTDH	.	0	0	0	0	0
chr12	51173922	51203372	ATF1	.	0	0	0	0	0
chr3	171944660	171969331	FNDC3B	.	0	0	0	0	0
chr7	102957276	102960125	DNAJC2	.	0	0	0	0	0
chr6	130631011	130706381	.	SAMD3	0	0	0	0	0
chr22	29193064	29195141	XBP1	.	0	0	0	0	0
chr21	47768925	47769734	PCNT	.	0	0	0	0	0
chr8	48003023	48045390	.	.	0	0	0	0	0
chr5	41794104	41801172	OXCT1	.	0	0	0	0	0
chr2	209045468	209051785	C2orf80	.	0	0	0	0	0
chr15	43067332	43109295	TTBK2	.	0	0	0	0	0
chr3	125032151	125050082	ZNF148	.	14	57	48	0.264151	0.280202
chr11	34093272	34098189	CAPRIN1	.	16	101	402	0.0634921	0.320231
chr1	52981562	52992045	ZCCHC11	.	0	0	0	0	0
chrX	53672262	53681075	HUWE1	.	5	152	166	0.031348	0.100072
chr2	122363276	122363756	CLASP1	.	9	62	30	0.193548	0.18013
chr2	136432901	136437894	R3HDM1	.	7	104	83	0.0744681	0.140101
chr11	8435041	8486369	STK33	.	5	13	64	0.128205	0.100072
chr2	191765289	191789319	GLS	.	9	96	143	0.075	0.18013
chr17	60061531	60062451	MED13	.	8	36	55	0.173913	0.160116
chr9	127670655	127674305	GOLGA1	.	6	10	43	0.222222	0.120087
chr8	128902834	128903244	PVT1	.	5	21	25	0.212766	0.100072
chr6	87920168	87928449	ZNF292	.	7	0	17	0.777778	0.140101
chr2	64778576	64780543	AFTPH	.	9	62	37	0.18	0.18013
chr6	158703294	158735300	.	.	9	13	12	0.692308	0.18013
chr7	38050522	38053183	.	.	7	0	0	14	0.140101
chr12	116668237	116675510	MED13L	.	3	0	39	0.15	0.0600433
chr18	13048857	13059311	CEP192	.	5	77	3	0.123457	0.100072
chr7	23650789	23651172	CCDC126	.	12	26	7	0.705882	0.240173
chr18	51804072	51813781	POLI	.	8	53	16	0.228571	0.160116
chr18	13048857	13073184	CEP192	.	8	77	44	0.131148	0.160116
chr11	8457040	8486369	STK33	.	12	45	64	0.218182	0.240173
chr21	34614144	34625135	IFNAR2	.	7	5	76	0.170732	0.140101
chr10	117221450	117228839	ATRNL1	.	13	36	11	0.541667	0.260188
chr5	109152973	109159538	MAN2A1	.	7	185	405	0.0236887	0.140101
chr1	29068914	29070498	YTHDF2	.	6	39	4	0.272727	0.120087
chr1	151060665	151090615	GABPB2	.	7	62	6	0.202899	0.140101
chr8	71071739	71075089	NCOA2	.	18	126	21	0.243243	0.36026
chr5	14673750	14681716	OTULIN	.	0	0	0	0	0
chr8	68005777	68007967	CSPP1	.	2	80	21	0.0392157	0.0400289
chr3	113207791	113225452	SPICE1	.	5	21	14	0.277778	0.100072
chr12	1289705	1299218	ERC1	.	3	118	122	0.0248963	0.0600433
chr20	39721111	39729993	TOP1	PLCG1-AS1	2	48	99	0.027027	0.0400289
chr9	33996220	34017187	UBAP2	.	2	71	21	0.0430108	0.0400289
chr1	224599128	224601037	WDR26	.	6	55	2	0.206897	0.120087
chr2	100078957	100081447	REV1	.	15	22	0	1.30435	0.300217
chr10	15875628	15885271	FAM188A	.	2	72	58	0.0305344	0.0400289
chr8	37623043	37623873	PROSC	.	5	10	45	0.178571	0.100072
chr22	32874967	32881196	FBXO7	.	10	97	185	0.0706714	0.200144
chr6	42559888	42562042	UBR2	.	3	52	20	0.0821918	0.0600433
chr2	61749745	61761038	XPO1	.	0	0	0	0	0
chr12	69983264	69987393	CCT2	.	15	811	1011	0.0164564	0.300217
chr2	172782046	172844276	HAT1	.	2	192	480	0.00594354	0.0400289
chr2	62100136	62103369	CCT4	.	3	884	938	0.00329128	0.0600433
chr7	24663284	24690331	MPP6	.	10	16	55	0.277778	0.200144
chr14	64065473	64066691	WDR89	.	14	1	35	0.756757	0.280202
chr13	33091993	33101669	N4BP2L2	.	2	6	33	0.1	0.0400289
chr14	50616725	50616948	SOS2	.	0	0	0	0	0
chr7	17908029	17915413	SNX13	.	3	50	50	0.0594059	0.0600433
chr1	110203786	110233186	GSTM2	.	4	3	2	1.33333	0.0800578
chr5	43675612	43704502	NNT	.	5	245	0	0.0406504	0.100072
chr9	88284399	88327481	AGTPBP1	.	5	3	19	0.434783	0.100072
chr8	22332466	22370945	PPP3CC	.	5	231	924	0.00865052	0.100072
chr9	37126308	37127260	ZCCHC7	.	0	0	0	0	0
chr17	57808781	57851246	VMP1	.	0	0	0	0	0
chr7	97820039	97823884	LMTK2	.	2	25	3	0.137931	0.0400289
chr12	27867712	27877119	MRPS35	.	3	72	185	0.0232558	0.0600433
chr14	81209418	81259454	CEP128	.	0	0	0	0	0
chr1	179972308	179975702	CEP350	.	7	106	67	0.0804598	0.140101
chr2	111423839	111427130	BUB1	.	4	455	148	0.013245	0.0800578
chr1	78267015	78280916	FAM73A	.	0	0	0	0	0
chr19	47767859	47768203	CCDC9	.	3	10	10	0.285714	0.0600433
chr19	38631823	38633350	SIPA1L3	.	5	24	4	0.344828	0.100072
chr2	136467002	136467801	R3HDM1	.	3	82	32	0.0521739	0.0600433
chr9	123593608	123595734	PSMD5	.	6	18	6	0.48	0.120087
chr1	172525008	172539870	SUCO	.	10	16	164	0.110497	0.200144
chr9	35295692	35313986	UNC13B	.	4	21	42	0.125	0.0800578
chr11	94219089	94224131	MRE11A	.	0	0	0	0	0
chr6	17648037	17649531	NUP153	.	2	85	120	0.0194175	0.0400289
chr9	130106513	130107756	GARNL3	.	3	15	2	0.333333	0.0600433
chr8	37971709	37976881	ASH2L	.	2	23	25	0.0816327	0.0400289
chr4	154315413	154318485	MND1	.	3	107	60	0.0357143	0.0600433
chr9	96233422	96238620	FAM120A	.	8	175	60	0.0677966	0.160116
chr1	12335881	12338095	VPS13D	.	5	23	22	0.217391	0.100072
chr18	12999419	13030607	CEP192	.	4	7	82	0.0888889	0.0800578
chr10	105767934	105778666	SLK	.	4	127	80	0.0384615	0.0800578
chr15	44620882	44673174	CASC4	.	0	0	0	0	0
chr9	77631183	77632364	CARNMT1	.	0	0	0	0	0
chr4	113483526	113506881	ZGRF1	.	0	0	0	0	0
chr1	21076215	21100103	HP1BP3	.	0	0	0	0	0
chr3	52238708	52240767	ALAS1	.	2	39	30	0.0571429	0.0400289
chr11	95546095	95552068	CEP57	.	0	0	0	0	0
chr20	34304661	34313077	RBM39	.	2	259	112	0.0107527	0.0400289
chr22	41568502	41569788	EP300	.	0	0	0	0	0
chr3	119219541	119232566	TIMMDC1	.	0	0	0	0	0
chr19	12825634	12826553	TNPO2	.	0	0	0	0	0
chr10	103552595	103570071	MGEA5	.	0	0	0	0	0
chr3	33725850	33731424	CLASP2	.	0	0	0	0	0
chr14	102661274	102676199	WDR20	.	3	18	3	0.272727	0.0600433
chr2	69565029	69573131	GFPT1	.	0	0	0	0	0
chr8	38677039	38678153	TACC1	.	0	0	0	0	0
chr2	61710091	61717911	XPO1	.	6	170	380	0.0217786	0.120087
chr15	50878588	50884823	TRPM7	.	0	0	0	0	0
chr9	33351557	33352717	NFX1	.	2	4	33	0.105263	0.0400289
chrX	10031484	10066619	WWC3	.	0	0	0	0	0
chr7	103801519	103808973	ORC5	.	0	0	0	0	0
chr6	7895338	7904956	BLOC1S5-TXNDC5	.	0	0	0	0	0
chr6	18160113	18166609	KDM1B	.	0	0	0	0	0
chr4	106345352	106377902	PPA2	.	0	0	0	0	0
chr1	35846859	35854683	ZMYM4	.	4	60	38	0.0808081	0.0800578
chr12	69229608	69230529	MDM2	.	0	0	0	0	0
chr8	48955592	48962538	UBE2V2	.	3	95	214	0.0193548	0.0600433
chr3	49016914	49017929	ARIH2	.	4	8	373	0.0209424	0.0800578
chr2	17846769	17927218	SMC6	.	0	0	0	0	0
chr1	150997086	150998149	PRUNE	.	4	22	35	0.137931	0.0800578
chr9	111819470	111826847	TMEM245	.	0	0	0	0	0
chr2	61505299	61508377	USP34	.	0	0	0	0	0
chr19	24015450	24015618	.	.	0	0	0	0	0
chr7	138951078	138957186	UBN2	.	0	0	0	0	0
chr21	38792600	38802702	DYRK1A	.	8	13	1	1.06667	0.160116
chr20	47691321	47706283	CSE1L	.	3	942	698	0.00365631	0.0600433
chr13	26974589	26975761	CDK8	.	0	0	0	0	0
chr4	39739039	39779430	UBE2K	.	0	0	0	0	0
chr10	32308785	32310215	KIF5B	.	0	0	0	0	0
chrX	64295353	64295792	.	.	0	0	0	0	0
chr7	128845043	128846428	SMO	.	4	2	0	2.66667	0.0800578
chr4	24572276	24578301	DHX15	.	0	0	0	0	0
chr5	118417268	118450236	DMXL1	.	2	2	45	0.0833333	0.0400289
chr3	152132729	152165562	MBNL1	.	3	687	42	0.00821918	0.0600433
chr22	25771779	25777545	LRP5L	.	3	1	0	3	0.0600433
chr18	56363597	56367823	MALT1	.	0	0	0	0	0
chr9	34241182	34242106	UBAP1	.	0	0	0	0	0
chr17	35931889	35945538	SYNRG	.	0	0	0	0	0
chr14	53622960	53656654	.	.	4	0	0	8	0.0800578
chr2	128520635	128528578	WDR33	.	2	156	40	0.0203046	0.0400289
chr17	60038227	60040332	MED13	.	0	0	0	0	0
chr6	64389900	64395812	PHF3	.	0	0	0	0	0
chr3	183435438	183446639	YEATS2	.	0	0	0	0	0
chr20	34450934	34459751	PHF20	.	0	0	0	0	0
chr1	244582061	244583598	ADSS	.	0	0	0	0	0
chr11	102701462	102703637	WTAPP1	.	3	0	0	6	0.0600433
chr10	74790028	74828741	P4HA1	.	0	0	0	0	0
chr18	2775731	2784619	SMCHD1	.	0	0	0	0	0
chr16	69395306	69402385	TERF2	.	0	0	0	0	0
chr1	231079551	231097049	TTC13	.	0	0	0	0	0
chr9	88925620	88934585	ZCCHC6	.	0	0	0	0	0
chr9	271626	289581	DOCK8	.	0	0	0	0	0
chr20	6077548	6078278	FERMT1	.	0	0	0	0	0
chr1	110125058	110129504	GNAI3	.	0	0	0	0	0
chr1	155408117	155408859	ASH1L	.	17	29	22	0.653846	0.340245
chr18	12999419	13019205	CEP192	.	16	7	17	1.28	0.320231
chr18	48444479	48466756	ME2	.	20	971	2722	0.0108284	0.400289
chr2	48555699	48573890	FOXN2	.	7	39	63	0.135922	0.140101
chr1	45223227	45223812	KIF2C	.	8	138	155	0.0544218	0.160116
chr16	47143393	47165936	NETO2	.	3	25	19	0.133333	0.0600433
chr5	56160560	56161804	MAP3K1	.	13	91	64	0.166667	0.260188
chr18	74561481	74563895	ZNF236	.	16	1	24	1.23077	0.320231
chr11	32948702	32956981	QSER1	.	8	0	10	1.45455	0.160116
chr17	27613009	27614734	NUFIP2	.	9	37	224	0.0687023	0.18013
chr2	99802639	99812219	MRPL30	.	5	134	10	0.0689655	0.100072
chr3	43341245	43345284	SNRK	.	8	4	32	0.432432	0.160116
chr1	92798947	92846430	RPAP2	.	5	3	2	1.66667	0.100072
chr11	119002244	119003929	HINFP	.	4	52	59	0.0714286	0.0800578
chr10	32197099	32199491	ARHGAP12	.	7	3	0	3.5	0.140101
chr1	9991948	9994918	LZIC	.	7	42	24	0.208955	0.140101
chr16	70294946	70296427	AARS	.	4	164	332	0.0160966	0.0800578
chr22	24698162	24709434	SPECC1L	.	0	0	0	0	0
chr11	108586605	108594189	DDX10	.	15	113	113	0.132159	0.300217
chr3	138289159	138291774	CEP70	.	0	0	0	0	0
chr11	70200406	70202360	PPFIA1	.	16	39	33	0.438356	0.320231
chr15	67524151	67529158	AAGAB	.	13	107	21	0.20155	0.260188
chr10	126628942	126631876	.	.	5	4	33	0.263158	0.100072
chr6	108243000	108250718	SEC63	.	0	0	0	0	0
chr3	196817782	196846401	DLG1	.	7	169	72	0.0578512	0.140101
chr17	35640167	35646430	ACACA	.	4	5	13	0.421053	0.0800578
chr3	141228409	141259451	RASA2	.	0	0	0	0	0
chr3	52771601	52775515	NEK4	.	2	23	36	0.0666667	0.0400289
chr2	173435453	173460751	PDK1	.	6	479	45	0.0228571	0.120087
chr2	135010665	135012215	.	.	5	6	63	0.142857	0.100072
chr15	93467550	93472321	CHD2	.	4	49	65	0.0695652	0.0800578
chr10	7409610	7412337	SFMBT2	.	2	12	77	0.0444444	0.0400289
chr9	98740342	98766983	ERCC6L2	.	0	0	0	0	0
chr8	101299728	101300495	RNF19A	.	3	263	181	0.0134831	0.0600433
chr8	42819453	42873637	HOOK3	.	7	275	1	0.0505415	0.140101
chr4	106613132	106614643	INTS12	.	4	70	116	0.0427807	0.0800578
chr2	190593385	190609514	ANKAR	.	3	8	0	0.666667	0.0600433
chr6	161455290	161471011	MAP3K4	.	3	6	31	0.157895	0.0600433
chr6	90052042	90053475	UBE2J1	.	12	1965	1244	0.00747664	0.240173
chr6	87925620	87943245	ZNF292	.	2	10	9	0.2	0.0400289
chr14	93760203	93762503	BTBD7	.	4	4	6	0.727273	0.0800578
chr1	156286956	156287338	CCT3	.	0	0	0	0	0
chr9	88190229	88261333	AGTPBP1	.	5	40	50	0.10989	0.100072
chr6	109249290	109258202	ARMC2	.	5	81	201	0.0353357	0.100072
chr11	118422500	118430579	IFT46	.	2	41	45	0.045977	0.0400289
chr18	48702264	48703946	MEX3C	.	5	0	44	0.222222	0.100072
chr10	225933	295028	ZMYND11	.	3	16	63	0.075	0.0600433
chr18	39607406	39629569	PIK3C3	.	6	213	121	0.0358209	0.120087
chr7	73100965	73101425	WBSCR22	.	9	75	81	0.11465	0.18013
chr1	180953812	180962561	STX6	.	0	0	0	0	0
chr14	61262934	61285565	MNAT1	.	0	0	0	0	0
chr1	155365249	155429689	ASH1L	POU5F1P4	6	29	85	0.104348	0.120087
chr1	150202905	150204264	ANP32E	.	6	931	141	0.0111836	0.120087
chr3	47466974	47470160	SCAP	.	10	35	75	0.18018	0.200144
chr19	5604593	5604947	SAFB2	.	5	37	31	0.144928	0.100072
chr6	108225832	108246136	SEC63	.	3	5	47	0.113208	0.0600433
chr17	40879652	40882936	EZH1	.	5	39	4	0.227273	0.100072
chr15	91524113	91525211	PRC1	PRC1-AS1	11	157	266	0.0518868	0.220159
chr12	89853414	89866052	POC1B	.	9	53	5	0.305085	0.18013
chr13	78293666	78327493	SLAIN1	.	0	0	0	0	0
chr5	142779220	142780417	NR3C1	.	4	37	50	0.0909091	0.0800578
chr11	107916996	107925682	CUL5	.	5	66	73	0.0714286	0.100072
chr9	110062421	110087285	RAD23B	.	6	150	145	0.0405405	0.120087
chr4	88104354	88116842	KLHL8	.	0	0	0	0	0
chr17	76187050	76188866	AFMID	.	8	71	0	0.222222	0.160116
chr17	49340634	49346265	UTP18	.	5	32	57	0.111111	0.100072
chr3	3819408	3830758	.	.	2	0	0	4	0.0400289
chr2	190670377	190682906	PMS1	.	7	62	78	0.0992908	0.140101
chrX	72797242	72804408	CHIC1	.	2	3	10	0.285714	0.0400289
chr11	6962801	6977013	ZNF215	.	4	30	3	0.235294	0.0800578
chr11	68318588	68331900	PPP6R3	.	4	274	74	0.0229226	0.0800578
chr15	41036244	41037457	RMDN3	.	0	0	0	0	0
chr14	81329100	81366373	CEP128	.	3	124	71	0.0306122	0.0600433
chr15	72338064	72338975	MYO9A	.	6	27	16	0.272727	0.120087
chr7	77407654	77408131	RSBN1L	.	4	99	0	0.08	0.0800578
chr1	230313963	230339036	GALNT2	.	7	68	84	0.0915033	0.140101
chr5	38991050	39021238	RICTOR	.	5	33	16	0.2	0.100072
chr19	8520288	8539128	HNRNPM	.	0	0	0	0	0
chr11	85961337	85967554	EED	.	5	95	60	0.0641026	0.100072
chr10	120488806	120489922	CACUL1	.	0	0	0	0	0
chr10	116879948	116931050	ATRNL1	.	2	12	18	0.129032	0.0400289
chr1	149931602	149936274	OTUD7B	.	3	48	67	0.0517241	0.0600433
chr10	114286845	114298089	VTI1A	.	2	99	116	0.0185185	0.0400289
chr2	55559701	55562300	CCDC88A	.	0	0	0	0	0
chr4	54292038	54310270	FIP1L1	.	0	0	0	0	0
chr5	14741935	14758707	ANKH	.	0	0	0	0	0
chr14	31404368	31425448	STRN3	.	4	50	78	0.0620155	0.0800578
chr6	82900789	82914675	IBTK	.	0	0	0	0	0
chr9	33293677	33295425	NFX1	.	0	0	0	0	0
chr20	35651052	35684059	RBL1	.	0	0	0	0	0
chr5	619104	620376	CEP72	.	4	13	12	0.307692	0.0800578
chr9	5968018	5988545	KIAA2026	.	0	0	0	0	0
chr7	27824781	27839709	TAX1BP1	.	0	0	0	0	0
chr21	40619626	40630598	BRWD1	.	0	0	0	0	0
chr17	80842020	80861354	TBCD	.	7	23	19	0.325581	0.140101
chr16	67644726	67646024	CTCF	.	4	78	64	0.0559441	0.0800578
chr1	162535801	162570693	UAP1	.	6	3259	12	0.00366748	0.120087
chrX	64271341	64295792	.	.	6	0	3	3	0.120087
chr7	18705835	18706099	HDAC9	.	0	0	0	0	0
chr3	56694758	56707753	FAM208A	.	4	50	18	0.115942	0.0800578
chr2	240929490	240954277	NDUFA10	.	0	0	0	0	0
chr2	160602280	160605414	MARCH7	.	0	0	0	0	0
chr18	42281139	42283072	SETBP1	.	4	14	10	0.32	0.0800578
chr6	137015277	137019820	MAP3K5	.	0	0	0	0	0
chr8	101281012	101300495	RNF19A	.	0	0	0	0	0
chr6	47251673	47254331	TNFRSF21	.	3	2	5	0.75	0.0600433
chr11	124517260	124518071	SIAE	.	2	99	49	0.0268456	0.0400289
chr6	90916287	90981660	BACH2	.	5	8	7	0.625	0.100072
chr15	79748439	79761487	KIAA1024	.	0	0	0	0	0
chr7	102944288	102944937	PMPCB	.	7	372	106	0.0292276	0.140101
chr3	141231004	141259451	RASA2	.	0	0	0	0	0
chr1	202724398	202733273	KDM5B	.	0	0	0	0	0
chr8	101271334	101300495	RNF19A	.	7	0	181	0.0769231	0.140101
chr6	76368977	76388643	SENP6	.	0	0	0	0	0
chr3	172013152	172028671	FNDC3B	.	3	58	209	0.0223881	0.0600433
chr7	91924202	91957214	ANKIB1	.	2	45	29	0.0533333	0.0400289
chr19	11223953	11224438	LDLR	.	0	0	0	0	0
chr12	1345934	1399178	ERC1	.	0	0	0	0	0
chr3	101535638	101540594	NXPE3	.	0	0	0	0	0
chr20	42331129	42333998	MYBL2	.	2	202	228	0.00928074	0.0400289
chr20	33954359	33971936	UQCC1	.	2	169	251	0.00950119	0.0400289
chr12	112513481	112516545	NAA25	.	0	0	0	0	0
chr2	210968827	211019335	KANSL1L	.	0	0	0	0	0
chr9	140458885	140459606	DPH7	.	0	0	0	0	0
chr7	122047593	122056218	CADPS2	.	0	0	0	0	0
chr18	60223435	60232329	ZCCHC2	.	3	21	69	0.0659341	0.0600433
chr11	34978930	34999729	PDHX	.	0	0	0	0	0
chr18	39595439	39609405	PIK3C3	.	0	0	0	0	0
chr12	124856567	124862930	NCOR2	.	0	0	0	0	0
chr7	97820925	97823884	LMTK2	.	0	0	0	0	0
chr6	110048311	110064975	FIG4	.	0	0	0	0	0
chr14	39620949	39628754	TRAPPC6B	.	0	0	0	0	0
chr7	152007050	152055760	KMT2C	.	4	32	46	0.101266	0.0800578
chr5	151169883	151170623	G3BP1	.	0	0	0	0	0
chr8	98673299	98718978	MTDH	.	0	0	0	0	0
chr5	176468126	176477937	ZNF346	.	2	18	13	0.125	0.0400289
chr20	25394425	25405963	GINS1	.	0	0	0	0	0
chr19	32847521	32851524	ZNF507	.	0	0	0	0	0
chr18	72997402	73000603	TSHZ1	.	3	6	0	0.857143	0.0600433
chr14	89178614	89181539	EML5	.	0	0	0	0	0
chr9	123230137	123253755	CDK5RAP2	.	0	0	0	0	0
chr6	142487364	142510671	VTA1	.	3	417	145	0.0106572	0.0600433
chrX	109263579	109352374	TMEM164	.	5	0	15	0.625	0.100072
chr9	130947825	130950213	CIZ1	.	0	0	0	0	0
chr8	34030494	34042423	.	.	0	0	0	0	0
chr6	56416981	56479282	DST	.	0	0	0	0	0
chr2	175976295	175986268	ATF2	.	4	78	70	0.0536913	0.0800578
chr19	11230767	11231198	LDLR	.	3	58	197	0.0234375	0.0600433
chr17	49048067	49064598	SPAG9	.	0	0	0	0	0
chr1	219366423	219414650	.	.	0	0	0	0	0
chr1	10380100	10384953	KIF1B	.	0	0	0	0	0
chr2	15629017	15651474	NBAS	.	0	0	0	0	0
chr17	49057106	49064598	SPAG9	.	0	0	0	0	0
chr20	40141484	40162209	CHD6	.	3	34	2	0.162162	0.0600433
chr7	131060182	131084192	MKLN1	.	0	0	0	0	0
chr1	51121113	51210447	FAF1	.	0	0	0	0	0
chr11	120317111	120330029	ARHGEF12	.	0	0	0	0	0
chr9	99220660	99220823	HABP4	.	0	0	0	0	0
chr7	143080248	143080415	ZYX	.	0	0	0	0	0
chr5	64747301	64769779	ADAMTS6	.	0	0	0	0	0
chr5	156945830	156947039	ADAM19	.	0	0	0	0	0
chr2	196544755	196548630	SLC39A10	.	0	0	0	0	0
chr1	235316020	235318427	RBM34	.	0	0	0	0	0
chr1	1735857	1756938	GNB1	.	3	70	124	0.0307692	0.0600433
chr11	18010143	18029623	SERGEF	.	0	0	0	0	0
chr3	196612021	196613565	SENP5	.	0	0	0	0	0
chr2	38201182	38231359	RMDN2	RMDN2-AS1	0	0	0	0	0
chr3	179418795	179426745	USP13	.	0	0	0	0	0
chr3	160131260	160141628	SMC4	.	0	0	0	0	0
chr18	19345732	19371518	MIB1	.	0	0	0	0	0
chr1	77620133	77635080	PIGK	.	0	0	0	0	0
chr16	75425277	75448593	CFDP1	.	0	0	0	0	0
chr15	49528047	49584734	GALK2	.	0	0	0	0	0
chr3	169840378	169847340	PHC3	.	0	0	0	0	0
chr3	133876964	133914026	RYK	.	0	0	0	0	0
chr17	61841375	61843554	CCDC47	.	0	0	0	0	0
chr1	155686796	155695810	DAP3	.	0	0	0	0	0
chr11	116734383	116744352	SIK3	.	0	0	0	0	0
chr3	12976947	12983365	IQSEC1	.	3	9	21	0.193548	0.0600433
chr15	77046148	77067458	SCAPER	.	3	20	0	0.285714	0.0600433
chr8	98698895	98725997	MTDH	.	0	0	0	0	0
chr4	128842678	128861152	MFSD8	.	0	0	0	0	0
chr3	178626309	178632350	.	.	0	0	0	0	0
chr2	55785910	55816092	PPP4R3B	.	0	0	0	0	0
chr21	10985044	10998332	.	.	2	8	4	0.307692	0.0400289
chr19	45766370	45766625	MARK4	.	0	0	0	0	0
chr18	34740162	34753044	KIAA1328	.	0	0	0	0	0
chr15	41988272	42021547	MGA	.	0	0	0	0	0
chr1	25551492	25554726	SYF2	.	0	0	0	0	0
chr1	150416726	150418877	RPRD2	.	0	0	0	0	0
chr11	108178623	108188248	ATM	.	0	0	0	0	0
chr10	70506917	70513834	CCAR1	.	2	51	123	0.0228571	0.0400289
chr10	66046225	66061412	.	.	0	0	0	0	0
chr10	38064271	38065503	.	.	0	0	0	0	0
chrX	67731690	67742759	YIPF6	.	0	0	0	0	0
chrX	62875373	62898452	ARHGEF9	.	0	0	0	0	0
chr9	133485340	133495845	FUBP3	.	0	0	0	0	0
chr9	125932180	125936121	STRBP	.	0	0	0	0	0
chr8	48746756	48752750	PRKDC	.	0	0	0	0	0
chr8	131172109	131193126	ASAP1	.	0	0	0	0	0
chr7	72951551	72957974	BCL7B	.	0	0	0	0	0
chr6	90082155	90097115	RRAGD	.	0	0	0	0	0
chr6	57072425	57075243	RAB23	.	0	0	0	0	0
chr6	111726672	111795682	REV3L	.	0	0	0	0	0
chr6	111632271	111652987	REV3L	.	0	0	0	0	0
chr4	187070326	187088416	FAM149A	.	0	0	0	0	0
chr4	151719232	151738409	LRBA	.	0	0	0	0	0
chr4	11330174	11339043	.	.	0	0	0	0	0
chr4	10447449	10447882	.	ZNF518B	0	0	0	0	0
chr3	52661288	52677359	PBRM1	.	0	0	0	0	0
chr3	49717347	49717550	.	APEH	0	0	0	0	0
chr2	47635599	47710111	MSH2	.	0	0	0	0	0
chr2	44204293	44216829	LRPPRC	.	0	0	0	0	0
chr2	206992520	207009750	NDUFS1	.	0	0	0	0	0
chr19	2438160	2438529	LMNB2	.	0	0	0	0	0
chr18	44407921	44409830	PIAS2	.	0	0	0	0	0
chr18	3534191	3582246	DLGAP1	.	0	0	0	0	0
chr17	35830503	35837130	TADA2A	.	0	0	0	0	0
chr17	2929301	2930364	RAP1GAP2	.	0	0	0	0	0
chr1	69550862	69554245	.	.	0	0	0	0	0
chr16	4484384	4487486	DNAJA3	.	0	0	0	0	0
chr1	5987708	6046387	NPHP4	.	0	0	0	0	0
chr14	81223235	81259454	CEP128	.	0	0	0	0	0
chr14	23375403	23378804	RBM23	.	0	0	0	0	0
chr13	100959445	100992513	PCCA	.	0	0	0	0	0
chr12	94804396	94806367	CEP83	.	0	0	0	0	0
chr1	197611840	197621445	DENND1B	.	0	0	0	0	0
chr11	76158113	76159724	EMSY	.	0	0	0	0	0
chr11	108204615	108205768	ATM	.	0	0	0	0	0
chr10	94396940	94410274	KIF11	.	0	0	0	0	0
chr10	75302560	75302889	USP54	.	0	0	0	0	0
chr10	12160747	12162266	DHTKD1	.	0	0	0	0	0
chr9	128419929	128434922	MAPKAP1	.	17	237	135	0.0911528	0.340245
chr12	69214104	69222711	MDM2	.	3	712	2866	0.00167645	0.0600433
chr13	113170753	113181798	TUBGCP3	.	8	4	16	0.761905	0.160116
chr8	98725889	98735263	MTDH	.	3	1927	5220	0.000839396	0.0600433
chr17	71231614	71233134	C17orf80	.	0	0	0	0	0
chr14	21971315	21972024	METTL3	.	10	78	17	0.208333	0.200144
chr5	6604250	6605521	NSUN2	.	3	142	263	0.0147783	0.0600433
chr2	128750760	128754065	SAP130	.	7	30	27	0.241379	0.140101
chr14	81362061	81372425	CEP128	.	10	59	84	0.138889	0.200144
chr8	52758220	52773806	PCMTD1	.	6	70	30	0.118812	0.120087
chr4	1905942	1941505	WHSC1	.	13	188	572	0.0341656	0.260188
chr1	150464886	150469384	TARS2	.	8	75	30	0.150943	0.160116
chr4	4650703	4651269	STX18-AS1	.	10	1	9	1.81818	0.200144
chr2	10740978	10747437	NOL10	.	0	0	0	0	0
chr1	155385534	155429689	ASH1L	POU5F1P4	4	79	85	0.0484848	0.0800578
chr3	171969049	171979873	FNDC3B	.	12	451	0	0.0530973	0.240173
chr10	12039670	12056183	UPF2	.	6	37	44	0.146341	0.120087
chr5	53839008	53843428	SNX18	.	8	178	1	0.0888889	0.160116
chr8	37734626	37735069	RAB11FIP1	.	0	0	0	0	0
chr1	172520651	172526934	SUCO	.	7	27	221	0.0562249	0.140101
chr4	1932352	1941505	WHSC1	.	13	1395	572	0.0132114	0.260188
chr8	61484604	61504528	RAB2A	.	9	385	204	0.0305085	0.18013
chr2	203329531	203332412	BMPR2	.	10	30	34	0.307692	0.200144
chr9	138741982	138774924	CAMSAP1	.	4	24	41	0.121212	0.0800578
chr1	184701970	184706845	EDEM3	.	10	2331	192	0.00792393	0.200144
chr8	37727937	37735069	RAB11FIP1	.	6	21	51	0.164384	0.120087
chr8	52744003	52773806	PCMTD1	.	4	74	30	0.0761905	0.0800578
chr3	169854206	169867032	PHC3	.	15	44	96	0.212766	0.300217
chr1	243579003	243589860	SDCCAG8	.	0	0	0	0	0
chr4	39739039	39757359	UBE2K	.	7	57	45	0.135922	0.140101
chr6	17624791	17649531	NUP153	.	4	65	120	0.0430108	0.0800578
chr14	80944596	80997230	CEP128	.	4	6	84	0.0879121	0.0800578
chr13	33109905	33111164	N4BP2L2	.	4	33	159	0.0414508	0.0800578
chr7	22330793	22357656	RAPGEF5	.	6	3	0	3	0.120087
chr14	81329100	81372425	CEP128	.	0	0	0	0	0
chr2	173423435	173429801	PDK1	.	6	171	625	0.0150565	0.120087
chr3	136183722	136221621	STAG1	.	2	116	79	0.0204082	0.0400289
chr3	63898263	63898901	ATXN7	.	6	17	7	0.48	0.120087
chr14	92592465	92609638	CPSF2	.	8	6	229	0.0677966	0.160116
chr7	155457868	155473602	RBM33	.	3	17	47	0.0923077	0.0600433
chr3	169831147	169840532	PHC3	.	5	36	48	0.117647	0.100072
chr8	42828431	42841938	HOOK3	.	2	599	446	0.00382409	0.0400289
chr3	98502406	98512636	ST3GAL6	.	4	60	2	0.126984	0.0800578
chr20	30904020	30904677	KIF3B	.	0	0	0	0	0
chr20	43600718	43625947	STK4	.	4	76	134	0.0379147	0.0800578
chr3	101389973	101391057	ZBTB11	.	4	33	43	0.103896	0.0800578
chr1	147805338	147808043	NBPF8	.	0	0	0	0	0
chr8	135612678	135622898	ZFAT	ZFAT-AS1	8	36	14	0.313725	0.160116
chr8	103850971	103855975	AZIN1	.	0	0	0	0	0
chr3	128514202	128526514	RAB7A	.	4	18	29	0.166667	0.0800578
chr18	59888269	59899660	KIAA1468	.	2	70	22	0.0430108	0.0400289
chr7	77378740	77394949	RSBN1L	.	0	0	0	0	0
chr1	21097422	21100103	HP1BP3	.	5	80	152	0.0429185	0.100072
chr10	15863654	15885271	FAM188A	.	0	0	0	0	0
chr3	169694733	169706147	SEC62	.	4	233	196	0.0186047	0.0800578
chr15	65471271	65472542	CLPX	.	5	47	36	0.119048	0.100072
chr9	35236465	35243361	UNC13B	.	7	113	36	0.0933333	0.140101
chr1	33413822	33415375	RNF19B	.	4	31	19	0.156863	0.0800578
chr6	139264649	139265759	REPS1	.	10	18	37	0.357143	0.200144
chr2	99786012	99787892	MITD1	.	0	0	0	0	0
chrX	130498722	130503026	.	.	0	0	0	0	0
chr2	197777605	197787849	PGAP1	.	5	2	0	3.33333	0.100072
chr1	162535801	162560301	UAP1	.	2	3259	1597	0.000823554	0.0400289
chr6	116966876	116980087	ZUFSP	.	0	0	0	0	0
chr14	56078736	56086030	KTN1	.	4	71	149	0.0361991	0.0800578
chr16	81385187	81411307	GAN	.	6	13	0	0.857143	0.120087
chr16	85667519	85667738	GSE1	.	4	7	2	0.8	0.0800578
chr8	28866588	28876430	HMBOX1	.	6	70	76	0.0816327	0.120087
chr11	85707868	85714494	PICALM	.	2	57	29	0.045977	0.0400289
chr10	104117795	104119192	GBF1	.	0	0	0	0	0
chr11	92085261	92088570	FAT3	.	10	0	0	20	0.200144
chr10	31661946	31750166	ZEB1	.	4	3	10	0.571429	0.0800578
chr8	42761315	42829337	HOOK3	.	0	0	0	0	0
chr2	173429230	173460751	PDK1	.	7	444	45	0.0285714	0.140101
chr15	91519905	91525211	PRC1	PRC1-AS1	0	0	0	0	0
chr4	2659529	2674099	FAM193A	.	0	0	0	0	0
chr16	17352844	17353355	XYLT1	.	0	0	0	0	0
chr3	27958264	27972446	.	.	2	0	3	1	0.0400289
chr13	33306237	33309467	PDS5B	.	0	0	0	0	0
chr4	2951660	2955372	NOP14	NOP14-AS1	3	189	157	0.0172911	0.0600433
chr20	34241449	34246936	CPNE1	.	0	0	0	0	0
chr20	49558567	49571822	DPM1	ADNP-AS1	2	1094	999	0.00191022	0.0400289
chr11	94178975	94180604	MRE11A	.	4	129	13	0.0559441	0.0800578
chr1	168007608	168014465	DCAF6	.	0	0	0	0	0
chr2	64083439	64085070	UGP2	.	5	76	50	0.0787402	0.100072
chr9	33948371	33956144	UBAP2	.	2	55	4	0.0666667	0.0400289
chr4	3088665	3109150	HTT	.	7	2	12	0.933333	0.140101
chr9	33986757	34017187	UBAP2	.	4	8	21	0.266667	0.0800578
chr14	73614502	73640415	PSEN1	.	5	71	63	0.0740741	0.100072
chr6	76412360	76412788	SENP6	.	0	0	0	0	0
chr4	88116475	88116842	KLHL8	.	5	6	19	0.384615	0.100072
chr10	3160973	3162236	PFKP	.	0	0	0	0	0
chr11	18312988	18314523	HPS5	.	10	59	40	0.2	0.200144
chr14	73181130	73198642	DPF3	.	4	56	61	0.0677966	0.0800578
chr7	100410368	100410830	EPHB4	.	7	0	2	4.66667	0.140101
chr3	188844845	188850486	.	.	2	6	1	0.5	0.0400289
chr12	112116954	112121111	BRAP	.	0	0	0	0	0
chrX	16846216	16847893	TXLNG	.	4	129	71	0.039801	0.0800578
chr3	169854206	169896726	PHC3	.	7	44	36	0.17284	0.140101
chr1	176050287	176105683	RFWD2	.	3	96	35	0.0454545	0.0600433
chr8	67986477	67988816	CSPP1	.	4	39	110	0.0533333	0.0800578
chr6	7884591	7889081	BLOC1S5-TXNDC5	.	0	0	0	0	0
chr5	74109664	74137504	FAM169A	.	0	0	0	0	0
chr15	66044716	66053776	DENND4A	.	5	38	6	0.222222	0.100072
chr5	122868262	122893258	CSNK1G3	.	2	0	101	0.0392157	0.0400289
chr5	133534776	133541822	PPP2CA	.	4	198	231	0.0186047	0.0800578
chr19	18258252	18258434	MAST3	.	5	19	14	0.294118	0.100072
chr4	25128885	25160729	SEPSECS	.	3	36	15	0.115385	0.0600433
chr5	147468916	147473305	.	SPINK5	8	1	7	1.77778	0.160116
chr8	17829837	17830196	PCM1	.	2	281	165	0.00894855	0.0400289
chr7	65592690	65599361	CRCP	.	6	36	30	0.179104	0.120087
chr2	44428324	44436466	PPM1B	.	0	0	0	0	0
chr1	91382196	91447927	ZNF644	.	0	0	0	0	0
chr18	76953182	76974038	ATP9B	.	4	65	19	0.0941176	0.0800578
chr1	145646114	145663367	NBPF20	.	0	0	0	0	0
chr10	102683734	102685776	SLF2	.	0	0	0	0	0
chr2	128747137	128754065	SAP130	.	3	10	27	0.157895	0.0600433
chr22	24698162	24743144	SPECC1L	.	7	53	33	0.16092	0.140101
chr3	129546645	129551669	TMCC1	.	0	0	0	0	0
chr7	33397466	33427756	BBS9	.	3	8	6	0.4	0.0600433
chr5	96349351	96364316	LNPEP	.	4	89	2	0.0869565	0.0800578
chr14	81297486	81304622	CEP128	.	0	0	0	0	0
chr11	118940943	118944661	VPS11	.	2	96	58	0.0258065	0.0400289
chr11	108199747	108202764	ATM	.	0	0	0	0	0
chr14	21825355	21829372	SUPT16H	.	0	0	0	0	0
chr20	2944917	2945848	VPS16	.	0	0	0	0	0
chr1	78097534	78107340	ZZZ3	.	0	0	0	0	0
chr3	61603333	61609229	PTPRG	.	0	0	0	0	0
chr3	33441680	33467233	UBP1	.	2	96	33	0.0307692	0.0400289
chr20	30380537	30382351	TPX2	.	2	634	355	0.0040404	0.0400289
chr1	78177431	78181553	USP33	.	7	78	38	0.119658	0.140101
chr10	90661412	90682193	STAMBPL1	.	2	5	19	0.16	0.0400289
chr1	145594038	145595220	POLR3C	NBPF20	0	0	0	0	0
chr8	618597	624047	ERICH1	.	0	0	0	0	0
chr18	8714136	8720494	.	.	0	0	0	0	0
chr16	18852886	18856973	SMG1	.	2	40	32	0.0547945	0.0400289
chr15	59204761	59205895	SLTM	.	5	8	108	0.0854701	0.100072
chr10	1118055	1126416	WDR37	.	3	4	5	0.6	0.0600433
chr11	120339996	120348235	ARHGEF12	.	2	644	396	0.00384246	0.0400289
chr16	30740286	30740893	SRCAP	.	3	5	10	0.375	0.0600433
chr16	11114049	11154879	CLEC16A	.	2	14	3	0.222222	0.0400289
chr9	81035195	81038128	.	.	0	0	0	0	0
chr5	173371969	173380275	CPEB4	.	0	0	0	0	0
chr5	134696186	134705832	H2AFY	.	2	196	283	0.00833333	0.0400289
chr2	27822449	27824309	ZNF512	.	0	0	0	0	0
chr18	20569183	20581692	RBBP8	.	0	0	0	0	0
chr16	85023909	85029613	ZDHHC7	.	0	0	0	0	0
chr17	59853761	59857762	BRIP1	.	2	13	26	0.1	0.0400289
chr2	69590676	69601245	GFPT1	.	0	0	0	0	0
chr15	41648236	41668026	NUSAP1	.	2	491	309	0.00499376	0.0400289
chr8	67513932	67514758	MYBL1	.	0	0	0	0	0
chr4	56319220	56322467	CLOCK	.	2	32	77	0.0363636	0.0400289
chr4	54280781	54310270	FIP1L1	.	7	120	137	0.0542636	0.140101
chr3	23710890	23711550	.	.	3	1	2	1.5	0.0600433
chr21	33073307	33078670	SCAF4	.	0	0	0	0	0
chr11	112064196	112072913	BCO2	.	0	0	0	0	0
chr7	77407654	77410091	RSBN1L	.	0	0	0	0	0
chr3	100013930	100016889	TBC1D23	.	0	0	0	0	0
chr12	112743867	112757546	HECTD4	.	0	0	0	0	0
chr1	171492359	171502100	PRRC2C	.	2	68	118	0.0213904	0.0400289
chr11	34107610	34107960	CAPRIN1	.	2	433	450	0.00452489	0.0400289
chr10	99196947	99197507	EXOSC1	.	0	0	0	0	0
chr3	61607643	61609229	PTPRG	.	0	0	0	0	0
chrX	48433555	48435497	RBM3	.	0	0	0	0	0
chr3	186509513	186522513	RFC4	.	0	0	0	0	0
chr1	22073559	22084276	USP48	.	0	0	0	0	0
chr10	15863654	15889942	FAM188A	.	0	0	0	0	0
chr3	47098310	47108608	SETD2	.	0	0	0	0	0
chr2	173429230	173429801	PDK1	.	0	0	0	0	0
chr20	42602006	42635432	TOX2	.	7	4	6	1.27273	0.140101
chr14	69583082	69589077	DCAF5	.	0	0	0	0	0
chr1	160293220	160302347	COPA	.	0	0	0	0	0
chr9	131254704	131255084	SLC27A4	.	4	51	41	0.0860215	0.0800578
chr8	124089350	124132428	TBC1D31	.	0	0	0	0	0
chr11	86778735	86782657	TMEM135	.	0	0	0	0	0
chr2	15691616	15698758	NBAS	.	0	0	0	0	0
chr2	62227835	62228117	COMMD1	.	2	75	136	0.0188679	0.0400289
chr6	109215669	109286343	ARMC2	ARMC2-AS1	0	0	0	0	0
chr6	108233919	108246136	SEC63	.	0	0	0	0	0
chr3	169863210	169896726	PHC3	.	0	0	0	0	0
chr13	77779390	77818086	MYCBP2	.	0	0	0	0	0
chr1	51005263	51061888	FAF1	.	0	0	0	0	0
chr2	44200745	44209573	LRPPRC	.	2	321	64	0.0103627	0.0400289
chr16	53907697	53922863	FTO	.	0	0	0	0	0
chr15	65756098	65772737	DPP8	.	2	48	28	0.0519481	0.0400289
chr15	52876941	52885933	FAM214A	.	0	0	0	0	0
chr1	156127860	156128615	SEMA4A	.	0	0	0	0	0
chr1	155348071	155385714	ASH1L	.	2	38	29	0.0588235	0.0400289
chr4	48371865	48396670	SLAIN2	.	0	0	0	0	0
chr7	115889073	115892530	TES	.	0	0	0	0	0
chr3	142242834	142279296	ATR	.	2	49	57	0.0373832	0.0400289
chr2	97399255	97400263	LMAN2L	.	4	24	35	0.133333	0.0800578
chr22	50810448	50845304	PPP6R2	.	0	0	0	0	0
chr18	9182379	9208801	ANKRD12	.	0	0	0	0	0
chr18	42362429	42364010	SETBP1	.	0	0	0	0	0
chr16	30507417	30507887	ITGAL	.	3	323	554	0.00683371	0.0600433
chr6	90454991	90460251	MDN1	.	0	0	0	0	0
chr6	90045020	90053475	UBE2J1	.	0	0	0	0	0
chr3	172080422	172098883	FNDC3B	.	3	142	110	0.0237154	0.0600433
chr16	69189773	69201088	UTP4	.	3	59	28	0.0681818	0.0600433
chr12	105385489	105389804	C12orf45	.	0	0	0	0	0
chr11	108172374	108181042	ATM	.	3	89	107	0.0304569	0.0600433
chr10	126631025	126655350	ZRANB1	.	0	0	0	0	0
chr1	185183638	185200840	SWT1	.	0	0	0	0	0
chr5	74041502	74046492	GFM2	.	2	84	36	0.0330579	0.0400289
chr8	38693679	38696064	TACC1	.	0	0	0	0	0
chr8	16955670	16977910	MICU3	.	2	0	0	4	0.0400289
chr5	77385216	77425131	AP3B1	.	2	100	60	0.0248447	0.0400289
chr21	46591524	46596579	ADARB1	.	2	87	40	0.03125	0.0400289
chr21	40596333	40610499	BRWD1	.	2	19	24	0.0909091	0.0400289
chr2	10784445	10808849	NOL10	.	0	0	0	0	0
chr17	64509453	64510584	PRKCA	.	4	1	2	2	0.0800578
chr15	44846750	44855423	EIF3J	SPG11	0	0	0	0	0
chr15	101775286	101775782	CHSY1	.	0	0	0	0	0
chr14	81223235	81304622	CEP128	.	0	0	0	0	0
chr11	62491058	62491898	BSCL2	.	0	0	0	0	0
chr1	114372213	114377061	PTPN22	AP4B1-AS1	0	0	0	0	0
chr10	90653627	90665417	STAMBPL1	.	0	0	0	0	0
chr10	5827814	5842668	GDI2	.	0	0	0	0	0
chr8	95390407	95423543	RAD54B	.	0	0	0	0	0
chr8	22355513	22370945	PPP3CC	.	0	0	0	0	0
chr7	66273872	66275834	RABGEF1	GTF2IRD1P1	0	0	0	0	0
chr7	131193709	131196192	PODXL	.	0	0	0	0	0
chr6	82923943	82933337	IBTK	.	3	30	10	0.146341	0.0600433
chr5	95091099	95099324	RHOBTB3	.	0	0	0	0	0
chr3	51474985	51477919	VPRBP	.	0	0	0	0	0
chr20	50048603	50052298	NFATC2	.	0	0	0	0	0
chr20	23370582	23383709	NAPB	.	0	0	0	0	0
chr17	27248705	27251320	PHF12	.	0	0	0	0	0
chr13	77785301	77818086	MYCBP2	.	0	0	0	0	0
chr1	224592131	224612356	WDR26	.	0	0	0	0	0
chr1	156294762	156304709	CCT3	.	0	0	0	0	0
chr11	34969052	34991833	PDHX	.	0	0	0	0	0
chr10	93711159	93713630	BTAF1	.	0	0	0	0	0
chr10	128768965	128798571	DOCK1	.	0	0	0	0	0
chr10	103557736	103567658	MGEA5	.	0	0	0	0	0
chr3	18419661	18462483	SATB1	.	0	0	0	0	0
chr13	20304378	20356931	PSPC1	.	0	0	0	0	0
chr9	3395471	3420870	RFX3	.	0	0	0	0	0
chr8	67504674	67514758	MYBL1	.	0	0	0	0	0
chr7	91700218	91715000	AKAP9	.	0	0	0	0	0
chr6	109215669	109258202	ARMC2	ARMC2-AS1	0	0	0	0	0
chr5	54635837	54675023	SKIV2L2	.	0	0	0	0	0
chr5	32121600	32143986	GOLPH3	.	0	0	0	0	0
chr4	108565957	108581228	PAPSS1	.	0	0	0	0	0
chr3	56657671	56707753	FAM208A	.	0	0	0	0	0
chr3	141272698	141278837	RASA2	.	0	0	0	0	0
chr2	9675962	9676957	ADAM17	.	0	0	0	0	0
chr22	41277773	41278181	XPNPEP3	.	0	0	0	0	0
chr2	190728468	190728954	PMS1	.	0	0	0	0	0
chr20	60699672	60706562	LSM14B	.	0	0	0	0	0
chr19	8520288	8532468	HNRNPM	.	0	0	0	0	0
chr19	18648410	18649243	FKBP8	.	0	0	0	0	0
chr17	4109615	4113242	ANKFY1	.	0	0	0	0	0
chr17	27778472	27794234	TAOK1	.	0	0	0	0	0
chr17	13768395	13796156	.	.	0	0	0	0	0
chr16	89371613	89383486	ANKRD11	.	0	0	0	0	0
chr15	72300166	72338975	MYO9A	.	0	0	0	0	0
chr1	52289335	52306186	NRDC	.	0	0	0	0	0
chr14	35560275	35579835	PPP2R3C	FAM177A1	2	49	138	0.0212766	0.0400289
chr1	40654726	40661436	RLF	.	0	0	0	0	0
chr11	75672487	75694557	UVRAG	.	2	92	86	0.0223464	0.0400289
chrX	53588716	53589205	HUWE1	.	0	0	0	0	0
chr8	48752576	48766775	PRKDC	.	0	0	0	0	0
chr7	158423188	158439255	NCAPG2	.	0	0	0	0	0
chr7	101950003	101952188	SH2B2	.	0	0	0	0	0
chr6	82923943	82930430	IBTK	.	0	0	0	0	0
chr6	76344422	76412788	SENP6	.	0	0	0	0	0
chr6	74183087	74189849	MTO1	.	0	0	0	0	0
chr5	74696029	74706928	COL4A3BP	.	0	0	0	0	0
chr5	179135239	179136060	CANX	.	0	0	0	0	0
chr5	172507587	172550205	CREBRF	.	0	0	0	0	0
chr4	170428187	170459062	NEK1	.	0	0	0	0	0
chr3	192444969	192463145	.	.	0	0	0	0	0
chr3	169866873	169896726	PHC3	.	0	0	0	0	0
chr3	167437849	167443261	PDCD10	.	0	0	0	0	0
chr2	203139835	203169329	NOP58	.	0	0	0	0	0
chr2	17942662	17946340	GEN1	.	0	0	0	0	0
chr19	6890491	6916379	ADGRE1	.	0	0	0	0	0
chr1	93070863	93091491	EVI5	.	0	0	0	0	0
chr19	1880363	1922898	.	ABHD17A	0	0	0	0	0
chr18	34534393	34539398	KIAA1328	.	0	0	0	0	0
chr17	3955264	3961449	ZZEF1	.	0	0	0	0	0
chr17	19843025	19866335	AKAP10	.	0	0	0	0	0
chr17	15974722	15979016	NCOR1	.	0	0	0	0	0
chr1	46105881	46120991	GPBP1L1	.	0	0	0	0	0
chr1	243468014	243493994	SDCCAG8	.	0	0	0	0	0
chr12	31600471	31633189	DENND5B	.	0	0	0	0	0
chr12	26864105	26943160	ITPR2	.	0	0	0	0	0
chr1	21306826	21329301	EIF4G3	.	0	0	0	0	0
chr1	21167348	21191755	EIF4G3	.	0	0	0	0	0
chr11	65267236	65267597	.	MALAT1	0	0	0	0	0
chr1	151150476	151156969	VPS72	.	0	0	0	0	0
chr11	122646926	122647918	UBASH3B	.	0	0	0	0	0
chr10	76910271	76910864	SAMD8	.	0	0	0	0	0
chr10	35805450	35819171	CCNY	.	0	0	0	0	0
chr2	208841374	208842310	PLEKHM3	.	16	1	11	2.46154	0.320231
chr10	34558584	34573173	PARD3	.	10	62	48	0.18018	0.200144
chr8	98673299	98703416	MTDH	.	4	1675	2033	0.00215692	0.0800578
chr11	85733409	85742653	PICALM	.	16	151	62	0.149533	0.320231
chr3	61608136	61609229	PTPRG	.	13	11	1	2	0.260188
chr9	86292641	86293514	UBQLN1	.	10	285	609	0.0223464	0.200144
chr6	155095122	155116273	SCAF8	.	15	45	58	0.288462	0.300217
chr2	82024941	82025642	.	.	5	6	3	1	0.100072
chr4	77055327	77065626	NUP54	.	11	25	44	0.314286	0.220159
chr13	51501542	51523641	RNASEH2B	.	6	80	148	0.0524017	0.120087
chr10	70227879	70229920	DNA2	.	13	21	16	0.684211	0.260188
chr1	29481207	29481422	SRSF4	.	7	145	123	0.0520446	0.140101
chr4	156617907	156643344	GUCY1A3	.	11	165	85	0.0876494	0.220159
chr1	162535801	162536138	UAP1	.	15	3259	5425	0.00345423	0.300217
chr6	161469647	161471011	MAP3K4	.	13	47	31	0.329114	0.260188
chr16	11940357	11941663	RSL1D1	.	11	1094	346	0.0152672	0.220159
chr2	177161587	177202305	MTX2	.	16	16	0	1.88235	0.320231
chr3	3178943	3186394	TRNT1	.	0	0	0	0	0
chr22	32874967	32875262	FBXO7	.	6	97	256	0.0338983	0.120087
chr4	83799882	83803093	SEC31A	.	5	131	188	0.03125	0.100072
chr22	42204878	42206295	CCDC134	.	8	17	19	0.432432	0.160116
chr2	86088303	86097381	ST3GAL5	.	3	41	3	0.133333	0.0600433
chr7	39243833	39247219	POU6F2	.	8	5	5	1.45455	0.160116
chr16	11815432	11830089	TXNDC11	.	3	523	68	0.0101351	0.0600433
chr3	33725850	33738425	CLASP2	.	3	99	48	0.0405405	0.0600433
chr1	115262199	115263338	CSDE1	.	3	319	1434	0.00342075	0.0600433
chr1	51001040	51061888	FAF1	.	4	190	141	0.0240964	0.0800578
chrX	154736558	154766779	TMLHE	.	3	9	0	0.6	0.0600433
chr10	76153898	76158337	ADK	.	7	176	40	0.0645161	0.140101
chr2	211018218	211019335	KANSL1L	.	7	43	2	0.304348	0.140101
chr2	72692288	72707879	EXOC6B	.	3	6	16	0.26087	0.0600433
chr7	40027197	40041630	CDK13	.	0	0	0	0	0
chr11	93429485	93433352	CEP295	.	3	61	44	0.0566038	0.0600433
chr1	162546566	162570693	UAP1	.	2	5431	12	0.000734754	0.0400289
chr17	5364258	5365866	DHX33	.	3	12	12	0.24	0.0600433
chr14	81209418	81297638	CEP128	.	6	20	156	0.0677966	0.120087
chr8	119251953	119253509	SAMD12	.	0	0	0	0	0
chr9	88233897	88248289	AGTPBP1	.	7	34	70	0.133333	0.140101
chr16	88694029	88695262	ZC3H18	.	4	20	50	0.112676	0.0800578
chr16	22236974	22237296	EEF2K	.	3	9	41	0.117647	0.0600433
chr6	109220896	109233761	ARMC2	ARMC2-AS1	0	0	0	0	0
chr1	169947225	170001116	KIFAP3	.	5	69	0	0.142857	0.100072
chr1	51868106	51874004	EPS15	.	9	6	51	0.310345	0.18013
chr10	31661946	31676727	ZEB1	.	9	3	6	1.8	0.18013
chr17	73238416	73239651	GGA3	.	7	66	60	0.110236	0.140101
chr7	30661008	30662078	GARS	.	4	282	702	0.00812183	0.0800578
chr1	187223507	187298192	LINC01036	.	3	4	24	0.206897	0.0600433
chr14	81380665	81382906	CEP128	.	4	66	84	0.0529801	0.0800578
chr2	20478343	20527139	PUM2	.	0	0	0	0	0
chr21	34614190	34625135	IFNAR2	.	4	13	76	0.0888889	0.0800578
chr1	151611363	151611595	SNX27	.	2	8	111	0.0333333	0.0400289
chr7	4780468	4780654	FOXK1	.	7	12	39	0.269231	0.140101
chr2	99811213	99812219	MRPL30	.	0	0	0	0	0
chr1	114377531	114397671	PTPN22	AP4B1-AS1	0	0	0	0	0
chr8	100108539	100205285	VPS13B	.	7	59	15	0.186667	0.140101
chr4	1918597	1936989	WHSC1	.	0	0	0	0	0
chr13	95953494	96003967	.	.	3	10	0	0.545455	0.0600433
chr5	100222046	100231489	ST8SIA4	.	0	0	0	0	0
chr11	120446377	120447998	GRIK4	.	8	6	3	1.6	0.160116
chr22	46125304	46136418	ATXN10	.	7	103	36	0.1	0.140101
chr16	22360599	22361170	CDR2	.	9	112	30	0.125874	0.18013
chr2	85595808	85598685	ELMOD3	.	3	13	1	0.4	0.0600433
chr7	24663281	24708279	MPP6	.	8	16	60	0.207792	0.160116
chr10	7409610	7423911	SFMBT2	.	4	12	6	0.421053	0.0800578
chr7	148851036	148851432	ZNF398	.	0	0	0	0	0
chr1	58992932	59004982	OMA1	.	0	0	0	0	0
chr7	22999874	23030758	FAM126A	.	9	83	43	0.141732	0.18013
chr6	107824860	107827631	SOBP	.	0	0	0	0	0
chr4	88091230	88116842	KLHL8	.	0	0	0	0	0
chr10	5838725	5842668	GDI2	.	0	0	0	0	0
chr9	140646782	140652463	EHMT1	.	0	0	0	0	0
chr2	201721404	201726585	CLK1	.	3	100	140	0.0248963	0.0600433
chr10	1125950	1126416	WDR37	.	4	43	5	0.163265	0.0800578
chr4	88084709	88116842	KLHL8	.	6	4	19	0.5	0.120087
chr22	46085591	46114373	ATXN10	.	0	0	0	0	0
chr1	24840803	24841057	RCAN3	.	9	5	9	1.2	0.18013
chr16	70292882	70296427	AARS	.	5	113	332	0.0224215	0.100072
chr14	35331249	35331528	BAZ1A	.	7	26	38	0.215385	0.140101
chr8	98698895	98718978	MTDH	.	8	2461	1924	0.00364797	0.160116
chr4	52729602	52744020	DCUN1D4	.	0	0	0	0	0
chr11	13435076	13466728	BTBD10	.	0	0	0	0	0
chr2	168869143	168873605	STK39	.	0	0	0	0	0
chr5	172359438	172362313	ERGIC1	.	0	0	0	0	0
chr5	139819703	139828890	ANKHD1	.	4	129	68	0.040404	0.0800578
chr2	61749745	61753656	XPO1	.	2	51	367	0.00954654	0.0400289
chr21	45106684	45108121	RRP1B	.	0	0	0	0	0
chr12	112096539	112098479	BRAP	.	8	186	51	0.0672269	0.160116
chr2	61118817	61128218	REL	.	0	0	0	0	0
chr7	23400204	23401360	IGF2BP3	.	5	0	1	5	0.100072
chr2	182346324	182350719	ITGA4	.	4	592	773	0.00585652	0.0800578
chr3	71090478	71102924	FOXP1	.	3	10	5	0.375	0.0600433
chr2	204244930	204267457	ABI2	.	0	0	0	0	0
chr1	28362054	28374937	EYA3	.	3	105	27	0.0451128	0.0600433
chr10	126370175	126370948	FAM53B	.	4	3	14	0.444444	0.0800578
chr17	27248705	27254081	PHF12	LOC101927018	4	5	36	0.190476	0.0800578
chrX	135304551	135326954	MAP7D3	.	5	272	200	0.0211416	0.100072
chr7	30590251	30601744	LOC401320	.	4	3	8	0.666667	0.0800578
chr3	197541778	197547301	LRCH3	.	0	0	0	0	0
chr22	38917612	38964294	DMC1	.	3	4	5	0.6	0.0600433
chr1	173961892	173962273	RC3H1	.	0	0	0	0	0
chr7	104714065	104719410	KMT2E	.	4	106	36	0.0559441	0.0800578
chr8	68018139	68028357	CSPP1	.	0	0	0	0	0
chr8	29927157	29927575	MIR548O2	.	0	0	0	0	0
chr9	125932180	125946577	STRBP	.	4	134	38	0.0462428	0.0800578
chr6	90039501	90053475	UBE2J1	.	0	0	0	0	0
chr3	119219541	119222868	TIMMDC1	.	5	59	118	0.0561798	0.100072
chr9	86294689	86301070	UBQLN1	.	3	597	99	0.00860832	0.0600433
chr4	103644027	103647840	MANBA	.	0	0	0	0	0
chr5	78936673	78964851	PAPD4	.	14	51	78	0.215385	0.280202
chr14	23395341	23396023	PRMT5	.	2	152	437	0.00677966	0.0400289
chr18	42281139	42375009	SETBP1	.	0	0	0	0	0
chr14	103470264	103478525	CDC42BPB	.	0	0	0	0	0
chr5	78915434	78919312	PAPD4	.	0	0	0	0	0
chr22	38083916	38084999	NOL12	.	0	0	0	0	0
chr15	41988272	41989221	MGA	.	0	0	0	0	0
chr12	83250788	83251359	TMTC2	.	4	27	3	0.258065	0.0800578
chr1	193202122	193205486	CDC73	.	7	111	31	0.0979021	0.140101
chr11	120916382	120918376	TBCEL	.	7	24	61	0.162791	0.140101
chr10	105371337	105420872	SH3PXD2A	.	0	0	0	0	0
chr8	105080739	105161076	RIMS2	.	0	0	0	0	0
chr7	158672374	158684024	WDR60	.	3	2	15	0.333333	0.0600433
chr6	74175931	74176329	MTO1	.	5	54	88	0.0699301	0.100072
chr4	148867767	148887990	ARHGAP10	.	7	94	43	0.101449	0.140101
chr3	133341934	133343019	TOPBP1	.	0	0	0	0	0
chr17	28808160	28811788	GOSR1	.	0	0	0	0	0
chr12	19615443	19626289	AEBP2	.	7	13	16	0.466667	0.140101
chr3	111985084	111999630	SLC9C1	.	0	0	0	0	0
chr6	90571844	90581107	CASP8AP2	.	2	24	0	0.16	0.0400289
chr19	18648410	18649246	FKBP8	.	0	0	0	0	0
chr2	69553302	69601245	GFPT1	.	3	0	103	0.0576923	0.0600433
chr14	97008579	97031551	PAPOLA	.	2	98	0	0.040404	0.0400289
chr16	74493579	74497377	GLG1	.	0	0	0	0	0
chr1	15860731	15863309	DNAJC16	.	2	5	16	0.181818	0.0400289
chr8	90657364	90660841	.	.	0	0	0	0	0
chr6	20781375	20846409	CDKAL1	.	0	0	0	0	0
chr5	100191806	100231489	ST8SIA4	.	0	0	0	0	0
chr20	47886478	47888287	ZNFX1	.	0	0	0	0	0
chr11	85722072	85742653	PICALM	.	5	23	62	0.116279	0.100072
chr11	74500670	74528759	RNF169	.	0	0	0	0	0
chr1	215749243	215752480	KCTD3	.	2	46	81	0.03125	0.0400289
chr7	72883846	72884813	BAZ1B	.	0	0	0	0	0
chr7	30590251	30614497	LOC401320	.	3	3	2	1	0.0600433
chr3	121354581	121356103	HCLS1	.	0	0	0	0	0
chr18	12999419	13073184	CEP192	.	5	7	44	0.192308	0.100072
chr13	61013821	61041513	TDRD3	.	2	2	9	0.333333	0.0400289
chr5	38991050	39003724	RICTOR	.	0	0	0	0	0
chr5	179134132	179137066	CANX	.	0	0	0	0	0
chr20	47707278	47711500	CSE1L	.	2	703	140	0.00473934	0.0400289
chr18	72589152	72601994	ZNF407	.	2	51	30	0.0487805	0.0400289
chr18	2666155	2674144	SMCHD1	.	5	72	116	0.0529101	0.100072
chr17	80417867	80430574	NARF	.	0	0	0	0	0
chr12	46285562	46287504	ARID2	.	0	0	0	0	0
chr3	114069120	114070725	ZBTB20	ZBTB20-AS1	3	5	1	0.857143	0.0600433
chr9	14639893	14680160	ZDHHC21	.	0	0	0	0	0
chr6	7886193	7904956	BLOC1S5-TXNDC5	.	4	2250	11622	0.00057666	0.0800578
chr6	108222573	108246136	SEC63	.	3	6	47	0.111111	0.0600433
chr5	31421378	31424578	DROSHA	.	2	36	6	0.0930233	0.0400289
chr4	83793096	83796975	SEC31A	.	0	0	0	0	0
chr20	60572605	60574164	TAF4	.	0	0	0	0	0
chrX	53652117	53654466	HUWE1	.	3	14	110	0.048	0.0600433
chr15	90984737	90986710	IQGAP1	.	4	142	55	0.040404	0.0800578
chr5	126140467	126147590	LMNB1	.	2	182	181	0.010989	0.0400289
chr8	68163533	68172161	ARFGEF1	.	5	22	36	0.169492	0.100072
chr8	10683661	10692285	PINX1	.	0	0	0	0	0
chr19	49642924	49643345	PPFIA3	.	0	0	0	0	0
chr17	65924470	65928135	BPTF	.	4	14	20	0.228571	0.0800578
chr16	9014215	9024254	USP7	.	0	0	0	0	0
chr15	101691924	101719185	.	.	2	0	332	0.012012	0.0400289
chr1	150413398	150418877	RPRD2	.	0	0	0	0	0
chr8	17847367	17851128	PCM1	.	3	261	289	0.0108893	0.0600433
chr3	52446826	52448603	PHF7	.	0	0	0	0	0
chr2	202010100	202014558	CFLAR	CFLAR-AS1	4	95	165	0.0306513	0.0800578
chr16	70566381	70573110	SF3B3	.	0	0	0	0	0
chr6	2397454	2399271	GMDS-AS1	.	0	0	0	0	0
chr4	148800382	148803083	ARHGAP10	.	5	80	70	0.0662252	0.100072
chr4	106155053	106158508	TET2	TET2-AS1	0	0	0	0	0
chr18	55280833	55283207	NARS	.	0	0	0	0	0
chr18	20570899	20576425	RBBP8	.	2	219	308	0.00757576	0.0400289
chr14	91755448	91760662	CCDC88C	.	8	35	70	0.150943	0.160116
chr1	48821341	48825442	SPATA6	.	0	0	0	0	0
chr14	35438375	35441270	.	.	0	0	0	0	0
chr10	93711159	93726514	BTAF1	.	4	229	27	0.0311284	0.0800578
chr16	70575571	70578436	SF3B3	.	0	0	0	0	0
chr1	184680856	184681732	EDEM3	.	3	678	779	0.00411523	0.0600433
chr5	58284319	58289292	PDE4D	.	2	17	19	0.108108	0.0400289
chr21	46591524	46605006	ADARB1	.	0	0	0	0	0
chr8	42780699	42814457	HOOK3	.	0	0	0	0	0
chr8	100108539	100168971	VPS13B	.	0	0	0	0	0
chr2	169018296	169038600	STK39	.	4	30	8	0.205128	0.0800578
chr1	89206670	89237562	PKN2	.	0	0	0	0	0
chr18	9182379	9211782	ANKRD12	.	0	0	0	0	0
chr14	91763648	91766414	CCDC88C	.	0	0	0	0	0
chr1	41474465	41475261	CTPS1	.	0	0	0	0	0
chr11	118360506	118363945	KMT2A	.	2	35	42	0.0512821	0.0400289
chr1	202742245	202746222	KDM5B	.	0	0	0	0	0
chr19	11168930	11170863	SMARCA4	.	2	137	130	0.0149254	0.0400289
chr16	70566381	70578436	SF3B3	.	0	0	0	0	0
chr2	136505836	136519481	UBXN4	.	3	35	203	0.0251046	0.0600433
chr8	42805530	42873637	HOOK3	.	0	0	0	0	0
chr17	54926056	54934026	DGKE	.	0	0	0	0	0
chr1	67356836	67371058	WDR78	.	2	6	0	0.571429	0.0400289
chr15	50875285	50884823	TRPM7	.	0	0	0	0	0
chr12	123798166	123800207	SBNO1	.	0	0	0	0	0
chr12	111951160	111957880	ATXN2	.	0	0	0	0	0
chr1	172520651	172560211	SUCO	.	0	0	0	0	0
chr1	151630710	151641111	SNX27	.	0	0	0	0	0
chr1	150413398	150416853	RPRD2	.	0	0	0	0	0
chr10	103916775	103917971	NOLC1	.	0	0	0	0	0
chr22	21178613	21193019	PI4KA	.	0	0	0	0	0
chr9	86292641	86301070	UBQLN1	.	0	0	0	0	0
chr9	111812562	111826847	TMEM245	.	0	0	0	0	0
chr8	42805530	42841938	HOOK3	.	0	0	0	0	0
chr2	203817281	203826149	CARF	.	2	33	8	0.0952381	0.0400289
chr2	203155045	203160560	NOP58	.	0	0	0	0	0
chr2	128922303	128928858	UGGT1	.	2	177	179	0.0112045	0.0400289
chr17	40174416	40174658	NKIRAS2	.	0	0	0	0	0
chr15	41961025	41991357	MGA	.	5	25	76	0.0980392	0.100072
chr10	3201105	3202522	PITRM1	.	7	44	79	0.112903	0.140101
chr4	2986239	3031136	GRK4	.	0	0	0	0	0
chr12	4219087	4219446	.	.	0	0	0	0	0
chr1	153734045	153737539	INTS3	.	5	135	97	0.0429185	0.100072
chrX	53641494	53641706	HUWE1	.	0	0	0	0	0
chr8	42761315	42785315	HOOK3	.	0	0	0	0	0
chr6	45479982	45514707	RUNX2	.	0	0	0	0	0
chr5	70805291	70806978	BDP1	.	2	77	39	0.034188	0.0400289
chr4	87685745	87689129	PTPN13	.	3	0	20	0.285714	0.0600433
chr3	138400808	138403645	PIK3CB	.	0	0	0	0	0
chr18	42449194	42533305	SETBP1	.	0	0	0	0	0
chr14	50262508	50267414	NEMF	.	0	0	0	0	0
chr11	78176921	78204241	NARS2	.	0	0	0	0	0
chr1	171548492	171556890	PRRC2C	.	2	227	316	0.00735294	0.0400289
chr8	98817580	98837381	LAPTM4B	.	0	0	0	0	0
chr6	76331247	76357517	SENP6	.	0	0	0	0	0
chr4	77916933	77952123	2011-09-01	.	0	0	0	0	0
chr3	50150815	50151684	RBM5	.	0	0	0	0	0
chr22	42204878	42206004	CCDC134	.	3	17	42	0.1	0.0600433
chr17	57842331	57851246	VMP1	.	0	0	0	0	0
chr17	49067810	49075978	SPAG9	.	0	0	0	0	0
chr17	26490568	26499644	NLK	.	0	0	0	0	0
chr14	81209418	81307112	CEP128	.	0	0	0	0	0
chr13	52971366	52976816	THSD1	.	0	0	0	0	0
chr1	184671944	184677478	EDEM3	.	0	0	0	0	0
chr11	120447096	120447998	GRIK4	.	0	0	0	0	0
chr10	111883774	111890244	ADD3	.	0	0	0	0	0
chr3	155547476	155551830	SLC33A1	.	0	0	0	0	0
chr3	169840378	169843795	PHC3	.	0	0	0	0	0
chr3	185155234	185161424	MAP3K13	.	2	8	16	0.16	0.0400289
chr14	75576387	75577074	NEK9	.	2	12	15	0.142857	0.0400289
chr14	39627488	39628754	TRAPPC6B	.	2	15	21	0.108108	0.0400289
chr8	30938382	30958471	WRN	.	0	0	0	0	0
chr7	105121498	105135700	PUS7	.	0	0	0	0	0
chr6	71242862	71248104	FAM135A	.	0	0	0	0	0
chr6	62687970	62757899	KHDRBS2	.	0	0	0	0	0
chr6	170626457	170632347	FAM120B	.	0	0	0	0	0
chr5	64863339	64868113	PPWD1	.	2	43	58	0.0392157	0.0400289
chr22	38894089	38897285	DDX17	.	0	0	0	0	0
chr22	38620791	38627340	TMEM184B	.	0	0	0	0	0
chr2	171862656	171863573	TLK1	.	0	0	0	0	0
chr2	136688051	136691560	DARS	.	0	0	0	0	0
chr19	8520288	8536311	HNRNPM	.	2	102	93	0.0204082	0.0400289
chr18	9204473	9239554	ANKRD12	.	0	0	0	0	0
chr17	35578644	35583373	ACACA	.	0	0	0	0	0
chr16	11096930	11118778	CLEC16A	.	2	22	37	0.0666667	0.0400289
chr13	41133645	41134997	FOXO1	.	0	0	0	0	0
chr1	243456392	243471479	SDCCAG8	.	0	0	0	0	0
chr1	223991875	223994649	TP53BP2	.	2	64	32	0.0412371	0.0400289
chr1	171492359	171494104	PRRC2C	.	6	68	258	0.0366972	0.120087
chr11	128963515	129034322	ARHGAP32	.	0	0	0	0	0
chr6	18212718	18214012	KDM1B	.	0	0	0	0	0
chr10	518378	532470	DIP2C	.	0	0	0	0	0
chr7	98564663	98569568	TRRAP	.	0	0	0	0	0
chr6	155108994	155154543	SCAF8	.	3	26	18	0.133333	0.0600433
chr5	75737217	75758139	IQGAP2	.	0	0	0	0	0
chr19	12635609	12639510	ZNF564	.	0	0	0	0	0
chr16	11114049	11118778	CLEC16A	.	0	0	0	0	0
chr9	86274694	86284242	UBQLN1	.	0	0	0	0	0
chr8	640897	642612	ERICH1	.	5	4	49	0.185185	0.100072
chr7	155493466	155499762	RBM33	.	2	45	2	0.0833333	0.0400289
chr5	43675612	43704444	NNT	.	0	0	0	0	0
chr3	65415194	65428524	MAGI1	.	0	0	0	0	0
chr3	47651555	47680270	SMARCC1	.	0	0	0	0	0
chr3	182788786	182789145	MCCC1	.	0	0	0	0	0
chr2	201994451	202014558	CFLAR	CFLAR-AS1	0	0	0	0	0
chr17	58538023	58539422	APPBP2	.	5	64	125	0.0526316	0.100072
chr17	45405634	45422464	EFCAB13	.	0	0	0	0	0
chr1	47745912	47748131	STIL	.	0	0	0	0	0
chr12	117365827	117387511	FBXW8	.	0	0	0	0	0
chr5	134010304	134011815	SEC24A	.	0	0	0	0	0
chr14	90446883	90451554	TDP1	.	0	0	0	0	0
chr12	29492783	29494749	ERGIC2	.	0	0	0	0	0
chr1	114964057	115007010	TRIM33	.	0	0	0	0	0
chrX	130883333	130918067	FIRRE	.	0	0	0	0	0
chr9	88247576	88261333	AGTPBP1	.	0	0	0	0	0
chr9	123280704	123301442	CDK5RAP2	.	0	0	0	0	0
chr8	16955966	16991770	MICU3	.	0	0	0	0	0
chr7	65705311	65706257	TPST1	.	2	2	17	0.2	0.0400289
chr6	149663820	149700654	TAB2	.	0	0	0	0	0
chr5	76745584	76760634	WDR41	.	2	79	93	0.0231214	0.0400289
chr3	69077050	69077446	TMF1	.	0	0	0	0	0
chr3	57618991	57627474	DENND6A	.	0	0	0	0	0
chr18	13681603	13682104	FAM210A	.	0	0	0	0	0
chr15	91030185	91035943	IQGAP1	.	0	0	0	0	0
chr14	81297486	81297638	CEP128	.	0	0	0	0	0
chr1	36213507	36214205	CLSPN	.	0	0	0	0	0
chr12	1213915	1225199	ERC1	.	0	0	0	0	0
chr1	197611840	197627499	DENND1B	.	2	40	30	0.056338	0.0400289
chr10	89268092	89280926	MINPP1	.	0	0	0	0	0
chr3	188925164	188956698	TPRG1	TPRG1-AS2	0	0	0	0	0
chr9	33953282	33996331	UBAP2	.	0	0	0	0	0
chr8	42716887	42729149	RNF170	.	0	0	0	0	0
chr8	22332466	22355625	PPP3CC	.	0	0	0	0	0
chr6	90461149	90463341	MDN1	.	0	0	0	0	0
chr4	148944413	148968202	ARHGAP10	.	0	0	0	0	0
chr3	132389041	132391021	UBA5	ACAD11	0	0	0	0	0
chr2	68717321	68772444	APLF	.	0	0	0	0	0
chr2	165969394	165970480	SCN3A	.	0	0	0	0	0
chr2	106739425	106782539	UXS1	.	0	0	0	0	0
chr20	33065576	33069011	ITCH	.	0	0	0	0	0
chr19	19756682	19757156	ATP13A1	.	0	0	0	0	0
chr15	65790201	65793117	DPP8	.	0	0	0	0	0
chr14	71443658	71462642	PCNX1	.	0	0	0	0	0
chr1	185143503	185144245	SWT1	.	0	0	0	0	0
chr11	68334481	68363686	PPP6R3	.	0	0	0	0	0
chr1	162567581	162571304	UAP1	.	0	0	0	0	0
chr1	15862969	15863309	DNAJC16	.	0	0	0	0	0
chr5	153409048	153414527	FAM114A2	.	0	0	0	0	0
chr2	88874183	88895181	EIF2AK3	LOC101928371	0	0	0	0	0
chrX	53432176	53432323	SMC1A	.	0	0	0	0	0
chrX	10031484	10035530	WWC3	.	0	0	0	0	0
chr9	6420911	6421142	UHRF2	.	0	0	0	0	0
chr9	19286766	19305525	DENND4C	.	0	0	0	0	0
chr8	61496766	61504528	RAB2A	.	0	0	0	0	0
chr7	129665997	129688984	ZC3HC1	.	0	0	0	0	0
chr6	76376427	76407233	SENP6	.	0	0	0	0	0
chr6	3076997	3078169	RIPK1	.	0	0	0	0	0
chr6	18236682	18237747	DEK	.	0	0	0	0	0
chr5	76330242	76342502	AGGF1	.	0	0	0	0	0
chr5	5292679	5293787	.	ADAMTS16	0	0	0	0	0
chr5	32125898	32143986	GOLPH3	.	0	0	0	0	0
chr5	171479932	171488272	STK10	.	0	0	0	0	0
chr5	130840318	130883883	RAPGEF6	.	0	0	0	0	0
chr5	118576113	118580271	DMXL1	.	0	0	0	0	0
chr4	83970318	83978561	COPS4	.	0	0	0	0	0
chr4	1961197	1962878	WHSC1	.	0	0	0	0	0
chr4	129752887	129773423	JADE1	.	2	19	24	0.0909091	0.0400289
chr3	155547476	155560408	SLC33A1	.	0	0	0	0	0
chr2	9650107	9668083	ADAM17	.	0	0	0	0	0
chr2	38536520	38546161	ATL2	.	0	0	0	0	0
chr2	29140758	29152576	WDR43	.	0	0	0	0	0
chr2	136402948	136418963	R3HDM1	.	0	0	0	0	0
chr21	34614190	34633032	IFNAR2	.	0	0	0	0	0
chr21	34614144	34660566	.	IL10RB-AS1	0	0	0	0	0
chr19	34922765	34929671	UBA2	.	0	0	0	0	0
chr19	33600622	33602808	GPATCH1	.	0	0	0	0	0
chr19	2111677	2111827	AP3D1	.	0	0	0	0	0
chr19	19049161	19049858	HOMER3	.	0	0	0	0	0
chr1	8568685	8617582	RERE	.	0	0	0	0	0
chr18	23612362	23637706	SS18	.	0	0	0	0	0
chr17	80521229	80521424	FOXK2	.	0	0	0	0	0
chr17	38065210	38066177	GSDMB	.	0	0	0	0	0
chr16	89961445	89967202	TCF25	.	0	0	0	0	0
chr16	71710349	71713438	PHLPP2	.	0	0	0	0	0
chr16	70566381	70575737	SF3B3	.	0	0	0	0	0
chr15	93480747	93518180	CHD2	.	2	68	20	0.0449438	0.0400289
chr15	68378643	68457142	PIAS1	.	0	0	0	0	0
chr15	63978557	63981898	HERC1	.	0	0	0	0	0
chr15	43102811	43109295	TTBK2	.	0	0	0	0	0
chr1	52937623	52975384	ZCCHC11	.	0	0	0	0	0
chr14	91409421	91467503	RPS6KA5	.	0	0	0	0	0
chr14	76238076	76259443	TTLL5	.	0	0	0	0	0
chr14	73614502	73659572	PSEN1	.	0	0	0	0	0
chr1	45340349	45341367	EIF2B3	.	0	0	0	0	0
chr13	95886863	95900007	ABCC4	.	0	0	0	0	0
chr12	26864105	26878698	ITPR2	.	0	0	0	0	0
chr1	198201682	198233365	NEK7	.	0	0	0	0	0
chr11	66515849	66526567	C11orf80	.	0	0	0	0	0
chr10	98703869	98711953	LCOR	.	0	0	0	0	0
chr10	94372796	94381230	KIF11	.	0	0	0	0	0
chrX	53423146	53432323	SMC1A	.	0	0	0	0	0
chrX	46712910	46719537	RP2	.	0	0	0	0	0
chrX	151092840	151093315	MAGEA4	.	0	0	0	0	0
chrX	109263579	109310624	TMEM164	.	0	0	0	0	0
chrX	10031484	10062321	WWC3	.	0	0	0	0	0
chr9	79890413	79908424	VPS13A	.	0	0	0	0	0
chr9	72333252	72356774	PTAR1	.	0	0	0	0	0
chr9	7011697	7015929	KDM4C	.	0	0	0	0	0
chr9	6475390	6486925	UHRF2	.	0	0	0	0	0
chr9	5742868	5774357	RIC1	.	0	0	0	0	0
chr9	33941646	33944637	UBAP2	.	0	0	0	0	0
chr9	20907148	20933102	FOCAD	.	0	0	0	0	0
chr9	15447092	15460311	SNAPC3	.	0	0	0	0	0
chr9	134025710	134039531	NUP214	.	0	0	0	0	0
chr9	130501960	130509550	SH2D3C	.	0	0	0	0	0
chr9	126392654	126439068	DENND1A	.	0	0	0	0	0
chr9	123280704	123280923	CDK5RAP2	.	0	0	0	0	0
chr9	121693396	121739714	.	.	0	0	0	0	0
chr9	117228546	117241051	DFNB31	.	0	0	0	0	0
chr9	107485148	107485999	.	.	0	0	0	0	0
chr8	84324027	84324290	.	.	0	0	0	0	0
chr8	62489330	62496588	ASPH	.	0	0	0	0	0
chr8	17867055	17872349	PCM1	.	0	0	0	0	0
chr8	132952745	132982890	EFR3A	.	0	0	0	0	0
chr8	103845283	103848618	AZIN1	.	0	0	0	0	0
chr8	100568677	100597745	VPS13B	.	0	0	0	0	0
chr7	90339129	90419967	CDK14	.	0	0	0	0	0
chr7	75189035	75190705	HIP1	.	0	0	0	0	0
chr7	44423664	44424743	NUDCD3	.	0	0	0	0	0
chr7	23454866	23458443	IGF2BP3	.	0	0	0	0	0
chr7	148771477	148777809	ZNF786	.	0	0	0	0	0
chr7	14613836	14712652	DGKB	.	0	0	0	0	0
chr7	133002037	133041327	EXOC4	.	0	0	0	0	0
chr7	132973675	133059756	EXOC4	.	0	0	0	0	0
chr7	105131986	105135700	PUS7	.	0	0	0	0	0
chr7	105098208	105108910	PUS7	.	0	0	0	0	0
chr6	86227473	86253478	SNX14	.	0	0	0	0	0
chr6	79770194	79773627	PHIP	.	0	0	0	0	0
chr6	71464682	71508440	SMAP1	.	0	0	0	0	0
chr6	42630995	42633983	UBR2	.	0	0	0	0	0
chr6	35586872	35588051	FKBP5	.	0	0	0	0	0
chr6	157431605	157454341	ARID1B	.	0	0	0	0	0
chr6	136879937	136883753	MAP3K5	.	0	0	0	0	0
chr6	108248082	108248817	.	SEC63	0	0	0	0	0
chr5	94833119	94845391	TTC37	.	0	0	0	0	0
chr5	78692645	78734972	HOMER1	.	0	0	0	0	0
chr5	77458642	77512061	AP3B1	.	0	0	0	0	0
chr5	77406030	77409747	AP3B1	.	0	0	0	0	0
chr5	53839008	53913760	.	.	0	0	0	0	0
chr5	40764615	40777688	PRKAA1	.	0	0	0	0	0
chr5	39002636	39030674	RICTOR	.	0	0	0	0	0
chr5	139889221	139889766	ANKHD1	.	0	0	0	0	0
chr5	139876104	139889766	ANKHD1	.	0	0	0	0	0
chr5	100222046	100222304	ST8SIA4	.	0	0	0	0	0
chr4	88957371	88987031	PKD2	.	0	0	0	0	0
chr4	42505466	42546003	ATP8A1	.	0	0	0	0	0
chr4	42236178	42253245	.	.	0	0	0	0	0
chr4	40892380	40895428	APBB2	.	0	0	0	0	0
chr4	39306433	39308324	RFC1	KLHL5	0	0	0	0	0
chr4	3101000	3190820	HTT	.	0	0	0	0	0
chr4	186111296	186112366	CFAP97	.	0	0	0	0	0
chr4	148886174	148944564	ARHGAP10	.	0	0	0	0	0
chr4	140255327	140262223	NAA15	.	0	0	0	0	0
chr4	121675707	121732604	PRDM5	.	0	0	0	0	0
chr3	62136776	62142898	PTPRG	.	0	0	0	0	0
chr3	50106122	50107985	RBM6	.	0	0	0	0	0
chr3	44816745	44828066	KIF15	.	0	0	0	0	0
chr3	31474128	31477474	.	.	0	0	0	0	0
chr3	195605123	195615477	TNK2	.	0	0	0	0	0
chr3	195533238	195533389	MUC4	.	0	0	0	0	0
chr3	171944660	171965566	FNDC3B	.	0	0	0	0	0
chr3	167217940	167254788	WDR49	.	0	0	0	0	0
chr3	158399783	158409437	GFM1	.	0	0	0	0	0
chr3	158376710	158399946	GFM1	LXN	0	0	0	0	0
chr3	129579782	129599402	TMCC1	.	0	0	0	0	0
chr3	129557740	129599402	TMCC1	.	0	0	0	0	0
chr3	124456414	124459046	UMPS	.	0	0	0	0	0
chr3	121448034	121449820	GOLGB1	.	0	0	0	0	0
chr2	99135426	99193606	INPP4A	.	0	0	0	0	0
chr2	38795340	38818790	HNRNPLL	.	0	0	0	0	0
chr2	32602655	32605358	BIRC6	.	0	0	0	0	0
chr22	47274548	47290742	TBC1D22A	.	0	0	0	0	0
chr22	43203078	43206950	ARFGAP3	.	0	0	0	0	0
chr22	42262834	42281015	SREBF2	.	0	0	0	0	0
chr2	24181170	24199945	UBXN2A	.	0	0	0	0	0
chr2	24103508	24108699	ATAD2B	.	0	0	0	0	0
chr2	240944626	240961757	NDUFA10	.	0	0	0	0	0
chr2	24021007	24046439	ATAD2B	.	0	0	0	0	0
chr2	239090705	239098613	ILKAP	.	0	0	0	0	0
chr2	228004876	228012300	COL4A4	.	0	0	0	0	0
chr22	24734353	24743144	SPECC1L	.	0	0	0	0	0
chr2	207395608	207414884	ADAM23	.	0	0	0	0	0
chr2	206997668	207009750	NDUFS1	.	0	0	0	0	0
chr2	203997780	204001497	NBEAL1	.	0	0	0	0	0
chr2	202144826	202145194	CASP8	.	0	0	0	0	0
chr2	191765289	191769893	GLS	.	0	0	0	0	0
chr2	178284996	178310354	AGPS	.	0	0	0	0	0
chr2	173377061	173377246	.	.	0	0	0	0	0
chr21	47801608	47811291	PCNT	.	0	0	0	0	0
chr21	45945048	45945207	.	TSPEAR	0	0	0	0	0
chr2	136505836	136530117	UBXN4	.	0	0	0	0	0
chr2	128481906	128484351	WDR33	.	0	0	0	0	0
chr20	3888572	3897697	PANK2	.	0	0	0	0	0
chr20	34430494	34519366	PHF20	.	0	0	0	0	0
chr19	8533657	8539128	HNRNPM	.	0	0	0	0	0
chr19	4422562	4498912	.	UBXN6	0	0	0	0	0
chr19	39866289	39869229	SAMD4B	.	0	0	0	0	0
chr19	1611702	1615820	TCF3	.	0	0	0	0	0
chr19	11240188	11242471	LDLR	.	0	0	0	0	0
chr19	10396113	10396344	.	ICAM1	0	0	0	0	0
chr18	9195548	9235907	ANKRD12	.	0	0	0	0	0
chr18	9195548	9216898	ANKRD12	.	0	0	0	0	0
chr18	67718646	67727278	RTTN	.	0	0	0	0	0
chr1	8555122	8617582	RERE	.	0	0	0	0	0
chr18	53763305	53770066	.	LINC01539	0	0	0	0	0
chr18	45415391	45423180	SMAD2	.	0	0	0	0	0
chr18	40922901	40923052	.	.	0	0	0	0	0
chr18	18588019	18600200	ROCK1	.	0	0	0	0	0
chr18	18586311	18608896	ROCK1	.	0	0	0	0	0
chr1	78181426	78191447	USP33	.	0	0	0	0	0
chr1	78063379	78107340	ZZZ3	.	0	0	0	0	0
chr17	54978779	54985924	TRIM25	.	0	0	0	0	0
chr17	47778002	47778872	SLC35B1	.	0	0	0	0	0
chr17	19839598	19861884	AKAP10	.	0	0	0	0	0
chr17	17158172	17165420	COPS3	.	0	0	0	0	0
chr17	13796041	13861594	.	.	0	0	0	0	0
chr1	70761812	70771973	ANKRD13C	.	0	0	0	0	0
chr16	69402278	69406258	TERF2	.	0	0	0	0	0
chr16	68321648	68331379	SLC7A6	.	0	0	0	0	0
chr16	66756455	66756704	DYNC1LI2	.	0	0	0	0	0
chr1	65095037	65107652	CACHD1	.	0	0	0	0	0
chr16	1837637	1838036	.	NUBP2	0	0	0	0	0
chr16	11778020	11781822	TXNDC11	.	0	0	0	0	0
chr15	93480747	93482948	CHD2	.	0	0	0	0	0
chr15	90760670	90763123	SEMA4B	.	0	0	0	0	0
chr15	66169669	66170293	RAB11A	.	0	0	0	0	0
chr15	65994642	65995346	DENND4A	.	0	0	0	0	0
chr15	49303927	49320879	SECISBP2L	.	0	0	0	0	0
chr15	44898222	44912601	SPG11	.	0	0	0	0	0
chr15	42850395	42853068	HAUS2	.	0	0	0	0	0
chr15	41044734	41045977	.	RMDN3	0	0	0	0	0
chr14	93182480	93183806	LGMN	.	0	0	0	0	0
chr14	89220855	89221015	EML5	.	0	0	0	0	0
chr14	81297486	81382906	CEP128	.	0	0	0	0	0
chr14	78390799	78399987	ADCK1	.	0	0	0	0	0
chr14	71116061	71116518	.	TTC9	0	0	0	0	0
chr14	53464387	53469399	.	.	0	0	0	0	0
chr14	51208299	51211083	NIN	.	0	0	0	0	0
chr14	45475210	45495075	FAM179B	.	0	0	0	0	0
chr1	41448949	41463198	CTPS1	.	0	0	0	0	0
chr14	103148231	103180954	RCOR1	.	0	0	0	0	0
chr1	40672955	40673957	RLF	.	0	0	0	0	0
chr13	95768175	95822882	ABCC4	.	0	0	0	0	0
chr13	73333610	73349513	DIS3	.	0	0	0	0	0
chr13	61013821	61109367	TDRD3	.	0	0	0	0	0
chr13	52971366	52976829	THSD1	.	0	0	0	0	0
chr13	49741379	49752790	FNDC3A	.	0	0	0	0	0
chr13	45978461	45983209	SLC25A30	.	0	0	0	0	0
chr13	26535712	26542817	ATP8A2	.	0	0	0	0	0
chr13	103309405	103317286	TPP2	.	0	0	0	0	0
chr1	29010094	29023596	GMEB1	.	0	0	0	0	0
chr12	72017139	72018072	ZFC3H1	.	0	0	0	0	0
chr12	69962784	69965214	FRS2	.	0	0	0	0	0
chr12	69218142	69222729	MDM2	.	0	0	0	0	0
chr12	58089562	58109753	OS9	.	0	0	0	0	0
chr12	53800368	53803345	SP1	.	0	0	0	0	0
chr12	49918464	49921496	SPATS2	.	0	0	0	0	0
chr12	4626226	4634749	C12orf4	.	0	0	0	0	0
chr12	4219087	4219400	.	.	0	0	0	0	0
chr1	233321276	233322241	PCNX2	.	0	0	0	0	0
chr12	32133811	32145683	KIAA1551	.	0	0	0	0	0
chr12	30783593	30789991	IPO8	.	0	0	0	0	0
chr1	227300012	227300614	CDC42BPA	.	0	0	0	0	0
chr12	23206924	23210831	.	.	0	0	0	0	0
chr12	123281853	123290842	CCDC62	.	0	0	0	0	0
chr12	123262037	123265877	CCDC62	.	0	0	0	0	0
chr12	12022357	12022903	ETV6	.	0	0	0	0	0
chr12	112403398	112441667	TMEM116	.	0	0	0	0	0
chr12	112096539	112117144	BRAP	.	0	0	0	0	0
chr12	101750331	101759403	UTP20	.	0	0	0	0	0
chr12	101750331	101755838	UTP20	.	0	0	0	0	0
chr11	98925446	98939775	.	CNTN5	0	0	0	0	0
chr11	94163076	94189504	MRE11A	.	0	0	0	0	0
chr1	193456519	193457178	.	.	0	0	0	0	0
chr1	183469391	183471526	SMG7	.	0	0	0	0	0
chr1	178846632	178855255	RALGPS2	.	0	0	0	0	0
chr11	77043774	77064644	PAK1	.	0	0	0	0	0
chr1	174363132	174384995	RABGAP1L	.	0	0	0	0	0
chr1	173915613	173921276	RC3H1	.	0	0	0	0	0
chr11	72548575	72552004	FCHSD2	.	0	0	0	0	0
chr1	167661528	167663539	RCSD1	.	0	0	0	0	0
chr1	154420600	154427057	IL6R	.	0	0	0	0	0
chr1	154150658	154151010	TPM3	.	0	0	0	0	0
chr1	153916815	153917273	.	DENND4B	0	0	0	0	0
chr11	35226058	35232996	CD44	.	0	0	0	0	0
chr11	35211544	35250895	.	CD44	0	0	0	0	0
chr11	34104501	34107766	CAPRIN1	.	0	0	0	0	0
chr1	117948170	117957453	MAN1A2	.	0	0	0	0	0
chr11	118454523	118461221	ARCN1	.	0	0	0	0	0
chr11	111558724	111593480	SIK2	.	0	0	0	0	0
chr11	107224249	107300177	CWF19L2	.	0	0	0	0	0
chr11	103173821	103229087	DYNC2H1	.	0	0	0	0	0
chr11	102953476	102954055	DCUN1D5	.	0	0	0	0	0
chr10	35477127	35495979	CREM	.	0	0	0	0	0
chr10	34540529	34542583	PARD3	.	0	0	0	0	0
chr10	27821435	27822923	RAB18	.	0	0	0	0	0
chr10	14896123	14897942	HSPA14	.	0	0	0	0	0
chr10	1296102	1296224	.	ADARB2	0	0	0	0	0
chr10	12159671	12162266	DHTKD1	.	0	0	0	0	0
chr10	104859682	104866463	NT5C2	.	0	0	0	0	0
chr10	104120778	104125356	GBF1	.	0	0	0	0	0
chr10	103699619	103717489	C10orf76	.	0	0	0	0	0
chr8	107691437	107705105	OXR1	.	5	101	92	0.0515464	0.100072
chr8	80963761	80976828	TPD52	.	7	558	1035	0.00878294	0.140101
chr9	4860124	4860901	RCL1	.	6	45	3	0.244898	0.120087
chr18	12999419	13042333	CEP192	.	8	7	62	0.228571	0.160116
chr7	156619298	156629579	LMBR1	.	9	22	19	0.428571	0.18013
chr1	162535801	162538176	UAP1	.	7	3259	4	0.00428922	0.140101
chr8	42819453	42829337	HOOK3	.	0	0	0	0	0
chr3	143704384	143708679	C3orf58	.	7	25	0	0.538462	0.140101
chr4	75040222	75067087	MTHFD2L	.	9	4	47	0.346154	0.18013
chr3	71739160	71748859	EIF4E3	.	4	3	13	0.470588	0.0800578
chr19	50838315	50862904	.	.	16	0	15	2	0.320231
chr4	129857809	129891623	SCLT1	.	0	0	0	0	0
chr12	109046047	109048186	CORO1C	.	5	56	30	0.114943	0.100072
chr3	121563299	121591635	EAF2	.	9	91	205	0.0606061	0.18013
chr2	170401230	170413807	FASTKD1	.	15	124	109	0.128205	0.300217
chr11	108186549	108206688	ATM	.	4	167	36	0.0392157	0.0800578
chr2	200233327	200246543	SATB2	.	6	16	58	0.16	0.120087
chr1	35846859	35855699	ZMYM4	.	8	60	27	0.181818	0.160116
chr8	98725889	98731417	MTDH	.	2	1927	3637	0.000718778	0.0400289
chr16	68308593	68309152	SLC7A6	.	0	0	0	0	0
chr20	47895640	47897501	ZFAS1	.	16	602	383	0.0324544	0.320231
chr11	118425173	118430579	IFT46	.	4	143	45	0.042328	0.0800578
chr11	93523739	93527201	MED17	.	2	188	151	0.0117647	0.0400289
chr20	40141484	40143591	CHD6	.	0	0	0	0	0
chr14	23395341	23396869	PRMT5	.	7	152	183	0.0416667	0.140101
chr6	146209155	146216113	SHPRH	.	5	36	34	0.140845	0.100072
chr5	154330380	154346797	MRPL22	.	2	52	0	0.0754717	0.0400289
chr3	27420739	27465643	SLC4A7	.	5	19	65	0.117647	0.100072
chr7	24663284	24720139	MPP6	.	6	16	43	0.2	0.120087
chr2	206992520	206994966	NDUFS1	.	9	207	291	0.0360721	0.18013
chr20	43600718	43623898	STK4	.	2	76	129	0.0194175	0.0400289
chr1	6867042	6885270	CAMTA1	.	0	0	0	0	0
chr5	176636636	176639196	NSD1	.	5	70	56	0.0787402	0.100072
chr10	70547683	70548085	CCAR1	.	5	90	32	0.0813008	0.100072
chr11	108046972	108047817	NPAT	.	5	57	169	0.0440529	0.100072
chr7	23015828	23030758	FAM126A	.	7	99	43	0.0979021	0.140101
chr9	86293355	86301070	UBQLN1	.	5	246	99	0.0289017	0.100072
chr4	38091552	38104778	TBC1D1	.	10	38	62	0.19802	0.200144
chr6	76331247	76344527	SENP6	.	7	46	33	0.175	0.140101
chr11	34111725	34113603	CAPRIN1	.	0	0	0	0	0
chr14	100847246	100848083	WDR25	.	5	6	4	0.909091	0.100072
chr2	45773870	45780869	SRBD1	.	5	14	32	0.212766	0.100072
chr15	87949593	87965267	.	.	9	19	12	0.5625	0.18013
chr1	150464886	150470223	TARS2	.	8	75	87	0.0981595	0.160116
chrX	134679347	134686071	INTS6L	.	5	23	40	0.15625	0.100072
chr12	1399017	1481143	ERC1	.	4	99	17	0.0683761	0.0800578
chr5	64824278	64825026	CENPK	.	9	47	67	0.156522	0.18013
chr6	7176887	7189555	RREB1	.	10	32	12	0.444444	0.200144
chr3	167754623	167759262	GOLIM4	.	0	0	0	0	0
chr9	88200377	88248289	AGTPBP1	.	5	61	70	0.0757576	0.100072
chr17	45695715	45696530	NPEPPS	.	2	11	17	0.137931	0.0400289
chr1	33760537	33760906	ZNF362	.	3	14	10	0.24	0.0600433
chr7	8257934	8275635	ICA1	.	0	0	0	0	0
chr17	35936438	35945538	SYNRG	.	3	1	32	0.176471	0.0600433
chr12	121220457	121222396	SPPL3	.	13	9	6	1.625	0.260188
chr18	72342922	72353078	ZNF407	.	5	3	24	0.357143	0.100072
chr11	117109316	117110576	RNF214	.	5	48	30	0.126582	0.100072
chr7	158580694	158591763	ESYT2	.	3	70	4	0.08	0.0600433
chr21	46538478	46554747	ADARB1	.	7	6	34	0.341463	0.140101
chr5	127474288	127488497	SLC12A2	.	3	95	24	0.05	0.0600433
chr12	112096539	112097149	BRAP	.	4	186	33	0.0363636	0.0800578
chr9	112898406	112900819	PALM2	.	10	14	194	0.0956938	0.200144
chr3	120469369	120469847	GTF2E1	.	0	0	0	0	0
chr2	97024782	97026448	NCAPH	.	0	0	0	0	0
chr11	47774467	47776216	FNBP4	.	3	170	32	0.0295567	0.0600433
chr8	42862989	42873637	HOOK3	.	0	0	0	0	0
chr2	240929490	240961757	NDUFA10	.	6	170	60	0.0519481	0.120087
chr1	23356961	23377013	KDM1A	.	3	20	64	0.0705882	0.0600433
chr15	73052747	73067438	ADPGK	.	10	50	93	0.138889	0.200144
chr8	42819453	42841938	HOOK3	.	2	275	446	0.00554017	0.0400289
chr2	73315177	73316443	RAB11FIP5	.	0	0	0	0	0
chr2	170411633	170413807	FASTKD1	.	10	14	109	0.16129	0.200144
chr10	225933	267296	ZMYND11	.	2	16	106	0.0325203	0.0400289
chr4	32147674	32159703	LOC102723828	.	3	10	4	0.4	0.0600433
chr8	41905895	41907225	KAT6A	.	8	23	52	0.210526	0.160116
chr6	73016960	73043538	RIMS1	.	5	4	2	1.42857	0.100072
chr20	46385932	46386207	SULF2	.	3	288	218	0.0118343	0.0600433
chr9	110062421	110074018	RAD23B	.	8	150	91	0.0661157	0.160116
chr9	134305476	134308181	PRRC2B	.	0	0	0	0	0
chr17	19861326	19861884	AKAP10	.	3	55	18	0.0810811	0.0600433
chr16	19717913	19722762	KNOP1	.	4	0	25	0.307692	0.0800578
chr14	81362061	81382906	CEP128	.	0	0	0	0	0
chr13	31204971	31205611	USPL1	.	0	0	0	0	0
chr12	5269472	5281055	.	.	0	0	0	0	0
chr11	120310837	120317794	ARHGEF12	.	5	533	459	0.0100705	0.100072
chr8	29959413	29962002	LEPROTL1	MIR548O2	0	0	0	0	0
chr4	52729602	52758017	DCUN1D4	.	4	6	23	0.266667	0.0800578
chr14	66028054	66028484	FUT8	.	4	10	46	0.140351	0.0800578
chr20	45874751	45875261	ZMYND8	.	5	10	100	0.0900901	0.100072
chr3	196831773	196846401	DLG1	.	3	119	72	0.03125	0.0600433
chr2	48049356	48050499	FBXO11	.	3	65	46	0.0535714	0.0600433
chr18	42281139	42287187	SETBP1	.	0	0	0	0	0
chr17	57430575	57430887	YPEL2	.	0	0	0	0	0
chr6	45399599	45405788	RUNX2	.	6	61	183	0.0489796	0.120087
chr19	18650180	18650530	FKBP8	.	0	0	0	0	0
chr11	107965117	107966418	CUL5	.	3	63	126	0.0315789	0.0600433
chr6	13639794	13644961	RANBP9	.	9	196	3	0.09	0.18013
chr5	122881110	122911657	CSNK1G3	.	3	17	46	0.09375	0.0600433
chr1	180366650	180382606	ACBD6	.	4	6	48	0.145455	0.0800578
chr3	138289159	138290198	CEP70	.	2	26	11	0.105263	0.0400289
chr6	7303782	7310262	SSR1	.	0	0	0	0	0
chr7	91842508	91855996	KRIT1	.	5	39	58	0.102041	0.100072
chr15	63845913	63855207	USP3	.	5	76	19	0.104167	0.100072
chr12	69222550	69233581	MDM2	.	5	836	4	0.0118906	0.100072
chr12	105321750	105322472	SLC41A2	.	6	26	18	0.266667	0.120087
chr1	151288048	151288985	PI4KB	.	3	118	58	0.0338983	0.0600433
chr15	75219106	75221573	COX5A	.	0	0	0	0	0
chr18	48450467	48458730	ME2	.	0	0	0	0	0
chr7	24659670	24690331	MPP6	.	4	0	55	0.142857	0.0800578
chr12	111947352	111948386	ATXN2	.	3	20	6	0.222222	0.0600433
chr18	9208654	9221997	ANKRD12	.	0	0	0	0	0
chr12	12397195	12397589	LRP6	.	4	6	7	0.571429	0.0800578
chr10	7262372	7327916	SFMBT2	.	4	3	12	0.5	0.0800578
chrX	53430497	53430825	SMC1A	.	0	0	0	0	0
chr8	18656804	18662408	PSD3	.	5	4	16	0.47619	0.100072
chr7	35707043	35712888	HERPUD2	.	7	22	32	0.254545	0.140101
chr5	75884730	75886411	IQGAP2	.	4	100	33	0.0597015	0.0800578
chr4	25848915	25849486	SEL1L3	.	3	147	53	0.0298507	0.0600433
chr12	31595708	31600703	DENND5B	.	4	18	40	0.135593	0.0800578
chr11	13435076	13443385	BTBD10	.	6	19	68	0.136364	0.120087
chr6	35280078	35280549	DEF6	.	6	62	80	0.0839161	0.120087
chr19	17212469	17213367	MYO9B	.	12	0	25	0.923077	0.240173
chr17	76000250	76027923	TNRC6C	.	0	0	0	0	0
chr3	3178943	3182332	TRNT1	.	0	0	0	0	0
chr18	74090809	74092259	ZNF516	.	4	10	5	0.5	0.0800578
chr19	49416267	49416821	NUCB1	NUCB1-AS1	5	339	195	0.0186916	0.100072
chr8	68015271	68049838	CSPP1	.	2	20	90	0.036036	0.0400289
chr20	32996456	33001685	ITCH	.	0	0	0	0	0
chr1	9991948	9995685	LZIC	.	0	0	0	0	0
chrX	149761066	149787612	MTM1	.	0	0	0	0	0
chr9	35231116	35243361	UNC13B	.	0	0	0	0	0
chr2	233651863	233660935	GIGYF2	.	3	2	0	2	0.0600433
chr13	41515056	41518061	ELF1	.	4	58	93	0.0526316	0.0800578
chr4	25315667	25317022	ZCCHC4	.	0	0	0	0	0
chr5	153413350	153414527	FAM114A2	.	0	0	0	0	0
chr12	49890615	49893988	SPATS2	.	4	67	28	0.0833333	0.0800578
chr3	170077486	170109048	SKIL	.	3	12	68	0.0740741	0.0600433
chr11	108172374	108175579	ATM	.	3	89	99	0.031746	0.0600433
chr11	85685750	85742653	PICALM	.	2	82	62	0.0275862	0.0400289
chr10	35349801	35360267	CUL2	.	4	95	69	0.0484848	0.0800578
chr2	24357988	24369956	FAM228B	.	4	2	1	2	0.0800578
chr5	72370568	72373320	FCHO2	.	9	10	3	1.28571	0.18013
chr5	10213602	10227759	.	.	0	0	0	0	0
chr4	153391092	153403825	FBXW7	.	0	0	0	0	0
chr22	38933596	38964294	DMC1	.	2	3	5	0.444444	0.0400289
chr17	37933903	37949186	IKZF3	.	6	197	289	0.0246407	0.120087
chr13	42385360	42393522	VWA8	.	0	0	0	0	0
chr1	184675776	184681011	EDEM3	.	6	838	491	0.00902256	0.120087
chr11	34978930	35013926	PDHX	.	0	0	0	0	0
chr2	53941520	53943880	ASB3	.	0	0	0	0	0
chr20	47708582	47711500	CSE1L	.	3	831	140	0.00617284	0.0600433
chr4	1902352	1941505	WHSC1	.	3	13	572	0.0102389	0.0600433
chr19	3660963	3661999	PIP5K1C	.	5	43	2	0.217391	0.100072
chrX	24190831	24197887	ZFX	.	2	8	68	0.0519481	0.0400289
chr8	42761315	42805598	HOOK3	.	3	172	122	0.020339	0.0600433
chr6	109232101	109286343	ARMC2	ARMC2-AS1	4	127	163	0.0274914	0.0800578
chr5	70888752	70900295	MCCC2	.	0	0	0	0	0
chr5	6623326	6625782	NSUN2	.	11	182	173	0.0617978	0.220159
chr4	48686689	48689177	FRYL	.	4	14	3	0.444444	0.0800578
chr2	111406810	111419418	BUB1	.	5	309	455	0.0130719	0.100072
chr20	47895640	47897107	ZFAS1	.	3	602	347	0.00631579	0.0600433
chr14	96807858	96813678	ATG2B	.	0	0	0	0	0
chr11	85718584	85742653	PICALM	.	7	29	62	0.152174	0.140101
chr1	175070268	175070406	.	TNN	0	0	0	0	0
chr15	66727364	66729230	MAP2K1	.	0	0	0	0	0
chr9	79952170	79986065	VPS13A	.	0	0	0	0	0
chr12	62864480	62895478	MON2	.	2	0	23	0.166667	0.0400289
chr6	90087389	90097309	RRAGD	.	7	174	133	0.0454545	0.140101
chr11	17190223	17191353	PIK3C2A	.	3	81	118	0.03	0.0600433
chr2	215609790	215661841	BARD1	.	3	126	10	0.0437956	0.0600433
chr10	27453992	27454468	MASTL	.	3	83	33	0.0512821	0.0600433
chr10	116879948	116925405	ATRNL1	.	4	12	91	0.0769231	0.0800578
chr4	37633006	37640126	RELL1	.	4	14	10	0.32	0.0800578
chr1	47761436	47767420	STIL	.	12	19	40	0.4	0.240173
chr7	104678572	104681470	KMT2E	.	3	0	68	0.0869565	0.0600433
chr4	77045801	77065626	NUP54	.	0	0	0	0	0
chr8	56854413	56866543	LYN	.	0	0	0	0	0
chr22	37328806	37330036	CSF2RB	.	6	103	15	0.10084	0.120087
chr11	120318582	120338017	ARHGEF12	.	0	0	0	0	0
chr3	71739160	71759635	EIF4E3	.	3	3	8	0.5	0.0600433
chr3	47139444	47147610	SETD2	.	0	0	0	0	0
chr14	102506572	102507010	DYNC1H1	.	0	0	0	0	0
chr10	17746429	17747740	STAM	.	4	67	38	0.0754717	0.0800578
chr18	59739905	59763183	PIGN	.	5	5	48	0.185185	0.100072
chr12	14576842	14578407	ATF7IP	.	2	21	48	0.0571429	0.0400289
chr17	49294694	49302570	MBTD1	.	5	22	6	0.344828	0.100072
chr18	48573289	48593557	SMAD4	.	2	11	62	0.0540541	0.0400289
chr8	101276261	101300495	RNF19A	.	0	0	0	0	0
chr6	170626457	170639638	FAM120B	.	4	2	2	1.6	0.0800578
chr16	53472927	53481018	RBL2	.	3	68	10	0.0759494	0.0600433
chr16	4516153	4519466	NMRAL1	.	0	0	0	0	0
chr9	77611362	77632364	CARNMT1	C9orf41-AS1	0	0	0	0	0
chr8	80830212	80831383	.	.	10	0	147	0.135135	0.200144
chr6	90556280	90566918	CASP8AP2	.	0	0	0	0	0
chr6	57058639	57075243	RAB23	.	0	0	0	0	0
chr5	109117096	109125228	MAN2A1	.	0	0	0	0	0
chr4	159634270	159636836	PPID	.	0	0	0	0	0
chr20	34309661	34320057	RBM39	.	0	0	0	0	0
chr18	48422178	48466756	ME2	.	11	153	2722	0.00764951	0.220159
chr11	61205096	61205585	SDHAF2	.	3	42	99	0.0422535	0.0600433
chr10	7405839	7423911	SFMBT2	.	0	0	0	0	0
chr3	122156016	122160963	KPNA1	LOC102723582	0	0	0	0	0
chr4	108603170	108622441	PAPSS1	.	5	62	25	0.113636	0.100072
chr22	34157357	34161940	LARGE	.	0	0	0	0	0
chr8	101271334	101277013	RNF19A	.	3	0	210	0.028436	0.0600433
chr8	68024206	68031056	CSPP1	.	0	0	0	0	0
chr11	82560090	82571159	PRCP	.	0	0	0	0	0
chr4	187627716	187630999	FAT1	.	4	10	11	0.363636	0.0800578
chr1	78183551	78191447	USP33	.	2	39	66	0.0377358	0.0400289
chr12	95887831	95889874	METAP2	.	0	0	0	0	0
chr9	134518625	134526336	RAPGEF1	.	4	24	22	0.170213	0.0800578
chr9	134381500	134381840	POMT1	.	10	16	2	1.05263	0.200144
chr7	80418621	80440017	SEMA3C	.	5	16	6	0.434783	0.100072
chr7	22347957	22357656	RAPGEF5	.	8	25	0	0.615385	0.160116
chr4	54292038	54294350	FIP1L1	.	6	291	85	0.0318302	0.120087
chr2	70451685	70463307	TIA1	.	5	90	99	0.0526316	0.100072
chr2	113057425	113082774	ZC3H6	.	0	0	0	0	0
chr20	40161688	40179999	CHD6	.	0	0	0	0	0
chr18	34643483	34647508	KIAA1328	.	6	0	19	0.6	0.120087
chr1	76205664	76216231	ACADM	DLSTP1	0	0	0	0	0
chr17	15974722	15976883	NCOR1	.	4	88	127	0.037037	0.0800578
chr14	97312431	97327072	VRK1	.	4	45	239	0.0280702	0.0800578
chr14	81302548	81307112	CEP128	.	0	0	0	0	0
chr1	155695172	155695810	DAP3	.	5	886	252	0.00877963	0.100072
chr1	145592632	145595220	POLR3C	NBPF20	0	0	0	0	0
chr1	117944807	118009049	MAN1A2	.	0	0	0	0	0
chr10	111667448	111674857	XPNPEP1	.	0	0	0	0	0
chr20	46252654	46256767	NCOA3	.	0	0	0	0	0
chr18	2732262	2747645	SMCHD1	.	3	169	500	0.00895522	0.0600433
chr1	153637695	153641033	ILF2	.	5	1370	96	0.00681663	0.100072
chr5	64084777	64100213	CWC27	.	4	45	74	0.0666667	0.0800578
chr11	118453893	118455359	ARCN1	.	5	243	728	0.0102881	0.100072
chr12	117423010	117426674	FBXW8	LOC100506551	6	38	11	0.24	0.120087
chrX	151804335	151809756	.	GABRQ	0	0	0	0	0
chr8	42761315	42814457	HOOK3	.	0	0	0	0	0
chr6	43492208	43494485	XPO5	POLR1C	0	0	0	0	0
chr4	77065301	77065626	NUP54	.	6	35	44	0.15	0.120087
chr2	210962809	211019335	KANSL1L	.	9	7	2	1.8	0.18013
chr2	109945679	109964405	SH3RF3	.	0	0	0	0	0
chr18	76856475	76886375	ATP9B	.	2	16	17	0.117647	0.0400289
chr16	18851019	18853776	SMG1	.	0	0	0	0	0
chr15	63821212	63829355	USP3	.	4	6	72	0.101266	0.0800578
chr14	66082695	66096324	FUT8	.	2	48	22	0.056338	0.0400289
chr14	40124048	40125012	.	.	2	0	1	2	0.0400289
chr12	4626226	4628046	C12orf4	.	0	0	0	0	0
chr11	120318582	120340097	ARHGEF12	.	0	0	0	0	0
chr6	44900389	44988369	SUPT3H	.	0	0	0	0	0
chr9	2191265	2192802	SMARCA2	.	3	55	0	0.107143	0.0600433
chr19	1218415	1219412	STK11	.	0	0	0	0	0
chr16	53175090	53191453	CHD9	.	2	0	15	0.25	0.0400289
chr5	86627164	86633908	RASA1	.	6	66	6	0.164384	0.120087
chr12	122825299	122826244	CLIP1	.	0	0	0	0	0
chr7	151873275	151875095	KMT2C	.	0	0	0	0	0
chr12	121853961	121855714	RNF34	.	0	0	0	0	0
chr5	74842834	74848416	POLK	.	0	0	0	0	0
[truncated: 4,369 more rows]

## Sheet: LR+DNMTi+EZH2i
chrom	start	end	sense_gene	antisense_gene	Len +EZH2i +AZA junction	SA	SD	Len +EZH2i +AZA CTL	Len +EZH2i +AZA RPM
chr4	1905942	1936989	WHSC1	.	203	191	553	0.544966	5.11669
chr19	24014398	24016323	.	.	153	59	17	3.97403	3.85642
chr4	153332454	153333681	FBXW7	.	102	57	4	3.29032	2.57095
chr4	1905942	1920350	WHSC1	.	114	191	1347	0.148148	2.87341
chr6	4891946	4892613	CDYL	.	60	12	51	1.875	1.51232
chr17	37933903	37934020	IKZF3	.	92	132	224	0.515406	2.3189
chr14	81297486	81307112	CEP128	.	36	56	127	0.391304	0.907394
chr18	9182379	9221997	ANKRD12	.	41	15	21	2.21622	1.03342
chr1	117944807	117963271	MAN1A2	.	52	142	33	0.590909	1.31068
chr12	1136913	1137738	ERC1	.	55	53	35	1.23596	1.3863
chr19	23541231	23545527	ZNF91	.	78	0	22	6.78261	1.96602
chr11	33307958	33309057	HIPK3	.	67	26	31	2.31034	1.68876
chr7	139415730	139416814	HIPK2	.	38	85	29	0.66087	0.957805
chr8	52773404	52773806	PCMTD1	.	43	142	25	0.511905	1.08383
chr14	23378691	23380612	RBM23	.	46	106	266	0.246649	1.15945
chr4	144464661	144465125	SMARCA5	.	75	276	167	0.337838	1.8904
chr16	30495147	30495584	ITGAL	.	20	302	183	0.0823045	0.504108
chr11	130130750	130131824	ZBTB44	.	54	42	3	2.34783	1.36109
chr1	1586822	1650894	CDK11B	MMP23A	23	0	22	2	0.579724
chr14	97299803	97327072	VRK1	.	28	50	189	0.233333	0.705751
chr3	31617887	31621588	STT3B	.	26	319	374	0.074928	0.65534
chr1	1158623	1159348	SDF4	.	23	95	191	0.160279	0.579724
chr3	56626997	56628056	CCDC66	.	41	31	30	1.32258	1.03342
chr17	80521229	80526077	FOXK2	.	15	8	21	1	0.378081
chr2	72945231	72960247	EXOC6B	.	9	15	16	0.5625	0.226848
chr4	73950965	73958017	ANKRD17	.	16	33	0	0.941176	0.403286
chr11	120345268	120348235	ARHGEF12	.	51	348	435	0.130102	1.28547
chr6	79752559	79770535	PHIP	.	30	188	49	0.252101	0.756162
chr1	155823066	155823597	GON4L	.	20	37	27	0.615385	0.504108
chr7	148543561	148544397	EZH2	.	23	178	4	0.251366	0.579724
chr15	64791491	64792365	ZNF609	.	17	3	4	4.25	0.428492
chr7	99621041	99621930	ZKSCAN1	.	17	30	17	0.708333	0.428492
chr4	87967317	87968746	AFF1	.	19	49	9	0.644068	0.478902
chr1	117944807	117957453	MAN1A2	.	12	142	160	0.0792079	0.302465
chr8	42761315	42798588	HOOK3	.	15	131	26	0.189873	0.378081
chr19	13039155	13039661	FARSA	.	37	113	113	0.325991	0.932599
chr22	42915719	42976365	.	SERHL2	20	63	12	0.526316	0.504108
chr14	81209418	81244390	CEP128	.	16	11	32	0.727273	0.403286
chr20	46252654	46262380	NCOA3	.	29	167	59	0.255507	0.730956
chr16	68155889	68160513	NFATC3	.	43	0	52	1.62264	1.08383
chr9	138773478	138774924	CAMSAP1	.	14	72	21	0.297872	0.352875
chr1	155644800	155649303	YY1AP1	.	13	88	38	0.204724	0.32767
chr12	69210591	69218431	MDM2	.	29	811	670	0.0391363	0.730956
chr5	122881110	122893258	CSNK1G3	.	71	6	86	1.52688	1.78958
chr18	42529845	42533305	SETBP1	.	21	48	96	0.289655	0.529313
chr1	117944807	117948267	MAN1A2	.	16	142	193	0.0952381	0.403286
chr10	70719561	70720005	DDX21	.	12	249	144	0.0609137	0.302465
chr2	200233327	200298237	SATB2	.	38	18	10	2.62069	0.957805
chr10	5836847	5842668	GDI2	.	20	552	576	0.0354296	0.504108
chr18	19345732	19359646	MIB1	.	22	53	71	0.352	0.554518
chr3	171965322	171969331	FNDC3B	.	30	132	65	0.30303	0.756162
chr4	1905942	1932497	WHSC1	.	24	191	1298	0.0322148	0.604929
chr18	9195548	9221997	ANKRD12	.	8	212	21	0.0683761	0.201643
chr5	109049220	109065214	MAN2A1	.	10	76	63	0.142857	0.252054
chr1	117944807	117984947	MAN1A2	.	11	142	30	0.127168	0.277259
chr2	37543379	37544322	PRKD3	.	8	24	19	0.363636	0.201643
chr11	120343758	120348235	ARHGEF12	.	26	837	435	0.0408484	0.65534
chr16	80718434	80719026	CDYL2	.	12	20	17	0.631579	0.302465
chr12	1399017	1399178	ERC1	.	6	71	22	0.12766	0.151232
chr13	49712882	49720071	FNDC3A	.	7	44	68	0.123894	0.176438
chr6	16326624	16328701	ATXN1	.	18	16	10	1.33333	0.453697
chr6	87925620	87928449	ZNF292	.	11	13	10	0.916667	0.277259
chr9	114148656	114154104	KIAA0368	.	32	95	176	0.235294	0.806572
chr21	10985044	10998335	.	.	8	1	36	0.421053	0.201643
chr20	57014000	57016139	VAPB	.	8	18	33	0.307692	0.201643
chr1	151139409	151139890	TNFAIP8L2	.	27	151	351	0.107356	0.680545
chr10	91511102	91522592	KIF20B	.	3	55	39	0.0631579	0.0756162
chr4	1918597	1920350	WHSC1	.	24	2466	1347	0.0125852	0.604929
chr3	157839891	157841780	RSRC1	.	12	81	107	0.126984	0.302465
chr17	45479497	45492285	EFCAB13	.	9	7	1	2	0.226848
chr3	171969049	172028671	FNDC3B	.	23	368	167	0.0858209	0.579724
chr21	11038727	11058323	BAGE5	.	23	55	10	0.69697	0.579724
chr8	109462051	109462721	EMC2	.	6	429	271	0.0171184	0.151232
chr1	58971731	59004982	OMA1	.	17	58	13	0.472222	0.428492
chr10	7285519	7327916	SFMBT2	.	9	12	14	0.666667	0.226848
chr15	41988272	41991357	MGA	.	19	79	35	0.330435	0.478902
chr3	56600621	56601081	CCDC66	.	6	41	15	0.210526	0.151232
chr6	77981056	77983024	.	.	8	1	2	4	0.201643
chr7	155465560	155473602	RBM33	.	24	37	44	0.585366	0.604929
chr12	116668337	116675510	MED13L	.	10	5	30	0.555556	0.252054
chr17	65941524	65972074	BPTF	.	6	21	14	0.333333	0.151232
chr20	30954186	30956926	ASXL1	.	15	24	29	0.555556	0.378081
chr20	43600718	43615937	STK4	.	16	57	73	0.244275	0.403286
chr11	95546095	95546753	CEP57	.	16	311	272	0.0547945	0.403286
chr9	33971648	33973235	UBAP2	.	0	0	0	0	0
chr8	103372298	103373854	UBR5	.	13	82	73	0.166667	0.32767
chr1	155408117	155429689	ASH1L	.	18	6	86	0.387097	0.453697
chr4	178274461	178274882	NEIL3	.	13	31	38	0.371429	0.32767
chr12	69210591	69222711	MDM2	.	11	811	2397	0.00685572	0.277259
chr3	169863210	169867032	PHC3	.	11	54	62	0.188034	0.277259
chr8	61653817	61655656	CHD7	.	23	12	32	1.02222	0.579724
chr8	109462051	109468159	EMC2	.	9	429	183	0.0293638	0.226848
chr19	33604672	33605325	GPATCH1	.	11	13	35	0.44898	0.277259
chr5	167915606	167921655	RARS	.	6	335	215	0.0217786	0.151232
chr10	126631025	126631876	ZRANB1	.	17	21	28	0.68	0.428492
chr9	33953282	33963789	UBAP2	.	21	14	23	1.10526	0.529313
chr4	153332454	153391140	FBXW7	.	2	57	0	0.0689655	0.0504108
chrX	139865339	139866824	.	CDR1	11	0	0	22	0.277259
chr4	56277780	56284152	TMEM165	.	18	32	398	0.0835267	0.453697
chr10	5815804	5842668	GDI2	.	19	533	576	0.0342342	0.478902
chr13	96409897	96416207	DNAJC3	.	11	96	246	0.0641399	0.277259
chr8	98698895	98703416	MTDH	.	17	2326	1683	0.0084788	0.428492
chr3	17051165	17056403	PLCL2	.	6	14	35	0.24	0.151232
chr19	8520288	8528570	HNRNPM	.	13	68	110	0.145251	0.32767
chr11	120916382	120930794	TBCEL	.	6	36	65	0.117647	0.151232
chr1	146724277	146731572	CHD1L	.	8	55	33	0.179775	0.201643
chr15	41961025	41962156	MGA	.	22	25	65	0.483516	0.554518
chr10	15875628	15889942	FAM188A	.	12	56	5	0.387097	0.302465
chr12	124071293	124074996	TMED2	.	6	507	1232	0.00689655	0.151232
chr14	39648294	39648666	PNN	.	0	0	0	0	0
chr15	87949593	87966067	.	.	5	12	7	0.5	0.126027
chr20	33065576	33067594	ITCH	.	3	264	134	0.0150376	0.0756162
chr4	39739039	39776553	UBE2K	.	10	76	89	0.120482	0.252054
chr17	37933903	37934263	IKZF3	.	7	132	1	0.104478	0.176438
chr3	50102463	50103935	RBM6	.	7	40	91	0.106061	0.176438
chr12	46622935	46637097	SLC38A1	.	18	154	150	0.118033	0.453697
chr12	120592773	120593523	GCN1	.	13	61	72	0.19403	0.32767
chr1	31465236	31468067	PUM1	.	11	8	227	0.0932203	0.277259
chr11	72695132	72700142	FCHSD2	.	5	34	51	0.116279	0.126027
chr5	41794104	41807540	OXCT1	.	0	0	0	0	0
chr10	28872327	28884970	WAC	.	11	220	257	0.0460251	0.277259
chr18	8718421	8720494	MTCL1	.	0	0	0	0	0
chr12	69222550	69230529	MDM2	.	7	674	525	0.0116667	0.176438
chr7	128655032	128658211	TNPO3	.	17	77	82	0.2125	0.428492
chr17	57808781	57816308	VMP1	.	14	106	89	0.142857	0.352875
chr16	68155889	68157024	NFATC3	.	12	0	34	0.685714	0.302465
chr5	68470703	68471364	CCNB1	.	7	313	201	0.0271845	0.176438
chr10	7318853	7327916	SFMBT2	.	19	6	14	1.80952	0.478902
chr7	99090662	99092254	ZNF394	.	6	0	23	0.5	0.151232
chr1	155691307	155695810	DAP3	.	21	420	185	0.0693069	0.529313
chr4	48371865	48385801	SLAIN2	.	10	9	33	0.465116	0.252054
chr3	171969049	172016577	FNDC3B	.	8	368	498	0.0184544	0.201643
chr18	44526019	44526886	.	.	12	2	4	3.42857	0.302465
chr11	108098321	108100050	ATM	.	12	74	36	0.216216	0.302465
chr10	102683731	102685776	SLF2	.	3	75	51	0.0472441	0.0756162
chr12	69644908	69656342	CPSF6	.	10	163	35	0.100503	0.252054
chr5	6737622	6746540	PAPD7	.	9	11	20	0.5625	0.226848
chr6	158733082	158735300	TULP4	.	9	14	7	0.818182	0.226848
chr10	5827104	5842668	GDI2	.	10	97	576	0.0296736	0.252054
chr5	60768507	60768864	ZSWIM6	.	12	7	51	0.40678	0.302465
chr10	105382226	105420872	SH3PXD2A	.	3	22	2	0.24	0.0756162
chr5	109049220	109051965	MAN2A1	.	7	76	177	0.0551181	0.176438
chr8	22332466	22333137	PPP3CC	.	10	203	120	0.0617284	0.252054
chr21	46548316	46554747	ADARB1	.	11	28	41	0.314286	0.277259
chr5	137320945	137324004	FAM13B	.	18	43	3	0.765957	0.453697
chr18	19345732	19399607	MIB1	.	10	53	90	0.138889	0.252054
chr1	28907071	28907741	SNHG12	.	7	72	20	0.150538	0.176438
chr8	28013458	28019595	ELP3	.	12	145	263	0.0586797	0.302465
chr1	1601102	1666274	CDK11B	MMP23A	2	4	0	0.8	0.0504108
chr12	46319924	46322642	SCAF11	.	7	81	56	0.101449	0.176438
chr22	22160138	22162135	MAPK1	.	15	68	55	0.241935	0.378081
chr14	99924615	99932150	SETD3	.	19	28	9	1	0.478902
chrX	134679347	134690225	INTS6L	.	16	27	77	0.304762	0.403286
chr20	60714130	60716000	PSMA7	.	2	321	250	0.00699301	0.0504108
chr18	9204473	9221997	ANKRD12	.	5	26	21	0.208333	0.126027
chr7	24659670	24708279	MPP6	.	10	0	49	0.4	0.252054
chr21	30693541	30702014	BACH1	.	5	15	44	0.166667	0.126027
chrX	149962163	149984551	CD99L2	.	8	15	160	0.0909091	0.201643
chr2	240929490	240946787	NDUFA10	.	13	115	180	0.0878378	0.32767
chr16	3900297	3901010	CREBBP	.	4	14	13	0.285714	0.100822
chr15	87898779	87966067	.	.	7	15	7	0.608696	0.176438
chr8	98731276	98735263	MTDH	.	5	1647	5001	0.00150399	0.126027
chr14	81209418	81227957	CEP128	.	7	11	82	0.148936	0.176438
chr20	46365446	46386207	SULF2	.	0	0	0	0	0
chr1	8601272	8617582	RERE	.	11	14	7	1	0.277259
chr11	108137897	108138069	ATM	.	4	93	84	0.0449438	0.100822
chr3	196118683	196129890	UBXN7	.	5	14	8	0.434783	0.126027
chr14	23375403	23380612	RBM23	.	4	35	266	0.0264901	0.100822
chr13	49742748	49752790	FNDC3A	.	2	124	262	0.0103359	0.0504108
chr1	231500072	231503382	EGLN1	.	7	0	184	0.0756757	0.176438
chr4	73956383	73958017	ANKRD17	.	21	34	0	1.2	0.529313
chr1	41536266	41541123	SCMH1	.	14	27	9	0.756757	0.352875
chr1	28362054	28384605	EYA3	.	0	0	0	0	0
chr19	34921480	34929671	UBA2	.	12	190	89	0.0857143	0.302465
chr7	24663284	24708279	MPP6	.	8	10	49	0.266667	0.201643
chr2	172782046	172809519	HAT1	.	12	125	90	0.111111	0.302465
chr21	17135209	17138460	USP25	.	9	15	38	0.333333	0.226848
chr1	21083658	21100103	HP1BP3	.	10	59	92	0.131579	0.252054
chr7	151944986	151970952	KMT2C	.	0	0	0	0	0
chr4	129913321	129925031	SCLT1	.	4	30	11	0.190476	0.100822
chr20	30115286	30115853	HM13	.	11	257	0	0.0852713	0.277259
chr2	231307651	231314970	SP100	.	3	76	32	0.0550459	0.0756162
chr11	118454523	118455359	ARCN1	.	0	0	0	0	0
chr10	116879948	116889297	ATRNL1	.	22	15	41	0.77193	0.554518
chr9	88920106	88924932	ZCCHC6	.	24	27	93	0.396694	0.604929
chr1	35824525	35827390	ZMYM4	.	16	6	15	1.45455	0.403286
chr15	81262802	81274523	MESDC2	.	6	2	192	0.0615385	0.151232
chr7	148716083	148718239	PDIA4	.	14	252	639	0.0313901	0.352875
chr4	1919867	1920350	WHSC1	.	8	1536	1347	0.00554785	0.201643
chr7	23015828	23023664	FAM126A	.	12	76	63	0.171429	0.302465
chr1	58971731	59002413	OMA1	.	7	58	60	0.117647	0.176438
chr1	115005725	115007010	TRIM33	.	10	20	20	0.487805	0.252054
chr16	4311779	4312702	TFAP4	.	10	5	73	0.253165	0.252054
chr6	24416624	24418806	MRS2	.	0	0	0	0	0
chr1	247319707	247323115	ZNF124	.	16	0	0	32	0.403286
chr15	41648236	41669502	NUSAP1	.	4	310	171	0.0165975	0.100822
chr15	63988322	64008672	HERC1	.	0	0	0	0	0
chr22	21288066	21288532	CRKL	.	9	38	185	0.0803571	0.226848
chr18	48444479	48450582	ME2	.	0	0	0	0	0
chr2	203419974	203421254	BMPR2	.	0	0	0	0	0
chr18	42281139	42339068	SETBP1	.	7	17	4	0.636364	0.176438
chr20	33057852	33069011	ITCH	.	3	140	185	0.0184049	0.0756162
chr6	117010482	117026323	KPNA5	.	5	52	10	0.15873	0.126027
chr7	158552176	158557544	ESYT2	.	7	115	57	0.0809249	0.176438
chr14	53464387	53510473	.	.	0	0	0	0	0
chr8	99718694	99719539	STK3	.	0	0	0	0	0
chr20	34317233	34320057	RBM39	.	8	78	469	0.0291971	0.201643
chr12	112371689	112381173	TMEM116	.	7	11	48	0.233333	0.176438
chr18	42281139	42281797	SETBP1	.	7	17	43	0.229508	0.176438
chr5	138699447	138700432	PAIP2	.	7	66	448	0.0271845	0.176438
chr11	120907213	120930794	TBCEL	.	9	18	65	0.214286	0.226848
chr2	72958135	72960247	EXOC6B	.	5	26	16	0.232558	0.126027
chr3	31617887	31641951	STT3B	.	0	0	0	0	0
chr18	33606862	33613800	RPRD1A	.	12	115	97	0.112676	0.302465
chr18	45391429	45423180	SMAD2	.	18	27	57	0.423529	0.453697
chr11	76174864	76183884	EMSY	.	10	17	35	0.377358	0.252054
chr1	65830317	65831879	DNAJC6	.	3	2	6	0.666667	0.0756162
chr2	122260742	122287901	CLASP1	.	7	8	46	0.254545	0.176438
chr2	173423435	173431661	PDK1	.	4	145	240	0.0207254	0.100822
chr19	19750893	19751380	GMIP	.	5	65	10	0.131579	0.126027
chr18	60206913	60217693	ZCCHC2	.	4	3	28	0.25	0.100822
chr8	27151596	27151827	TRIM35	.	18	1	58	0.6	0.453697
chrX	134679347	134683730	INTS6L	.	3	27	96	0.0483871	0.0756162
chr4	2951660	2952972	NOP14	NOP14-AS1	0	0	0	0	0
chr7	40027197	40027857	CDK13	.	9	20	56	0.233766	0.226848
chr10	105197771	105198565	PDCD11	.	7	53	164	0.0642202	0.176438
chr7	99952765	99953427	STAG3L5P-PVRIG2P-PILRB	.	0	0	0	0	0
chr20	36685933	36694658	RPRD1B	.	2	31	11	0.0930233	0.0504108
chr20	34309661	34313077	RBM39	.	2	150	79	0.0173913	0.0504108
chrX	19983161	19988416	CXorf23	.	7	4	0	2.8	0.176438
chr9	6420911	6434173	UHRF2	.	3	14	69	0.0714286	0.0756162
chrX	48024315	48123352	.	SSX5	0	0	0	0	0
chr6	7181356	7189555	RREB1	.	5	75	6	0.121951	0.126027
chr18	55278868	55283207	NARS	.	3	268	822	0.00549954	0.0756162
chr15	77657504	77681144	PEAK1	.	4	11	0	0.666667	0.100822
chr2	136620176	136622733	MCM6	.	2	54	226	0.0142349	0.0504108
chr19	5047486	5082515	KDM4B	.	6	29	9	0.307692	0.151232
chr4	76573822	76581054	G3BP2	.	4	316	184	0.0159681	0.100822
chr12	69983264	69985939	CCT2	.	0	0	0	0	0
chr5	32268806	32276848	MTMR12	.	0	0	0	0	0
chr17	4186092	4200109	UBE2G1	.	3	122	202	0.0184615	0.0756162
chr1	21295966	21329301	EIF4G3	.	2	65	143	0.0191388	0.0504108
chr6	5404774	5431405	FARS2	.	3	53	7	0.0983607	0.0756162
chr4	17816475	17816981	NCAPG	.	0	0	0	0	0
chr3	98487273	98492827	ST3GAL6	.	6	21	419	0.0272109	0.151232
chr6	76344422	76388643	SENP6	.	0	0	0	0	0
chr6	44971389	44988369	SUPT3H	.	0	0	0	0	0
chr11	118656760	118657227	DDX6	.	11	66	51	0.186441	0.277259
chr10	22193450	22209892	DNAJC1	.	18	3453	139	0.0100195	0.453697
chr5	32135677	32143986	GOLPH3	.	7	370	263	0.022082	0.176438
chr6	7899808	7904956	BLOC1S5-TXNDC5	.	2	2357	6920	0.000431127	0.0504108
chr22	50810448	50832564	PPP6R2	.	4	24	53	0.102564	0.100822
chr1	84376847	84412965	LOC101927587	.	11	50	14	0.338462	0.277259
chr5	65349233	65350779	ERBIN	.	9	106	23	0.138462	0.226848
chr10	112356155	112358048	SMC3	.	5	138	75	0.046729	0.126027
chr4	39915230	39927553	PDS5A	.	8	130	227	0.0446927	0.201643
chr12	69214104	69218431	MDM2	.	6	750	670	0.00844476	0.151232
chr6	13579682	13584457	SIRT5	.	6	4	6	1.09091	0.151232
chr11	73418464	73429763	RAB6A	.	8	75	31	0.149533	0.201643
chr2	58449076	58459247	FANCL	.	7	26	14	0.341463	0.176438
chr5	118433673	118450236	DMXL1	.	12	82	38	0.198347	0.302465
chr14	31139461	31144271	SCFD1	.	8	97	147	0.0653061	0.201643
chr5	80071512	80088663	MSH3	.	10	92	75	0.119048	0.252054
chr1	22816372	22818026	ZBTB40	.	4	40	41	0.097561	0.100822
chr10	22193450	22218070	DNAJC1	.	8	3453	317	0.00424291	0.201643
chr21	30698379	30702014	BACH1	.	8	44	44	0.179775	0.201643
chr17	40650941	40653322	ATP6V0A1	.	2	64	61	0.031746	0.0504108
chr3	142455220	142467302	TRPC1	.	7	4	14	0.736842	0.176438
chr3	171969049	172025291	FNDC3B	.	4	368	49	0.0191388	0.100822
chr18	48450467	48466756	ME2	.	7	1024	1860	0.00485269	0.176438
chr9	20819794	20823114	FOCAD	.	3	59	69	0.0465116	0.0756162
chr8	42812236	42819617	HOOK3	.	8	98	322	0.0380048	0.201643
chr2	45773870	45789895	SRBD1	.	5	15	17	0.30303	0.126027
chr2	215609790	215646233	BARD1	.	7	86	103	0.0736842	0.176438
chr3	123649948	123667979	CCDC14	.	5	50	85	0.0735294	0.126027
chr6	109215669	109225608	ARMC2	.	2	55	69	0.032	0.0504108
chr6	10703637	10705077	PAK1IP1	.	7	54	26	0.17284	0.176438
chr7	72873865	72884813	BAZ1B	.	4	60	126	0.0427807	0.100822
chr16	87782278	87795646	KLHDC4	.	4	34	15	0.16	0.100822
chr1	14099572	14109326	PRDM2	.	0	0	0	0	0
chr17	62130139	62130731	ERN1	.	0	0	0	0	0
chr13	21742126	21742538	SKA3	.	5	19	10	0.333333	0.126027
chr14	53558502	53570574	DDHD1	.	0	0	0	0	0
chr7	152007050	152012423	KMT2C	.	10	40	50	0.21978	0.252054
chr1	1747194	1756938	GNB1	.	0	0	0	0	0
chr16	19627435	19628130	C16orf62	.	0	0	0	0	0
chr10	116590610	116608496	FAM160B1	.	0	0	0	0	0
chr7	104702610	104722244	KMT2E	.	9	84	37	0.147541	0.226848
chr7	129760588	129762042	KLHDC10	.	0	0	0	0	0
chr6	7904806	7904956	BLOC1S5-TXNDC5	.	0	0	0	0	0
chr5	93978977	93990457	SLF1	.	3	11	29	0.146341	0.0756162
chr9	128099296	128099870	GAPVD1	.	3	7	37	0.133333	0.0756162
chr10	125780771	125806240	CHST15	.	4	21	23	0.177778	0.100822
chr1	155490890	155491409	ASH1L	.	9	60	31	0.195652	0.226848
chr4	146744573	146770713	ZNF827	.	2	0	5	0.666667	0.0504108
chr12	116674625	116675510	MED13L	.	0	0	0	0	0
chr6	7298155	7299056	SSR1	.	0	0	0	0	0
chr21	34614144	34635942	IFNAR2	.	0	0	0	0	0
chr16	58593707	58594266	CNOT1	.	0	0	0	0	0
chr4	36230203	36231267	ARAP2	.	3	26	3	0.2	0.0756162
chr1	154207066	154207767	UBAP2L	.	2	539	53	0.00674536	0.0504108
chr8	28304687	28309883	FBXO16	.	0	0	0	0	0
chr14	80963811	80997230	CEP128	.	14	6	27	0.823529	0.352875
chr17	20107645	20109225	SPECC1	.	13	10	38	0.530612	0.32767
chr8	107691437	107696587	OXR1	.	9	98	667	0.0234987	0.226848
chr12	46633461	46637097	SLC38A1	.	11	281	150	0.0509259	0.277259
chr18	54423813	54426184	WDR7	.	9	71	24	0.1875	0.226848
chr2	190656515	190682906	PMS1	.	15	17	30	0.625	0.378081
chr10	125798030	125806240	CHST15	.	12	48	23	0.333333	0.302465
chr5	102432244	102433485	GIN1	.	10	15	54	0.285714	0.252054
chr9	138741982	138758382	CAMSAP1	.	7	22	71	0.148936	0.176438
chr1	155896466	155896947	KIAA0907	.	5	194	238	0.0230947	0.126027
chr11	108098321	108138069	ATM	.	6	74	84	0.0754717	0.151232
chr12	124904502	124915333	NCOR2	.	6	9	41	0.235294	0.151232
chr20	33057852	33080402	ITCH	.	6	140	146	0.0418118	0.151232
chr4	75040222	75091111	MTHFD2L	.	5	6	9	0.625	0.126027
chr12	70193988	70195501	RAB3IP	.	6	14	19	0.352941	0.151232
chr20	35812582	35812776	RPN2	.	8	546	774	0.012112	0.201643
chr10	112723882	112745523	SHOC2	.	8	10	241	0.0634921	0.201643
chr1	70758070	70781249	ANKRD13C	.	11	73	40	0.192982	0.277259
chr1	67423741	67428843	MIER1	.	13	72	61	0.19403	0.32767
chr7	87593948	87607727	ADAM22	.	11	0	10	2	0.277259
chr5	179136873	179147561	CANX	.	0	0	0	0	0
chr1	161071837	161072165	PFDN2	.	3	460	172	0.00947867	0.0756162
chr20	45891031	45905539	ZMYND8	.	3	56	45	0.0588235	0.0756162
chr18	53763305	53764426	.	LINC01539	2	3	2	0.666667	0.0504108
chrX	149983334	149984551	CD99L2	.	6	134	160	0.040678	0.151232
chr2	200245086	200298237	SATB2	.	5	62	10	0.136986	0.126027
chr2	239090705	239093928	ILKAP	.	7	19	25	0.311111	0.176438
chr15	63824845	63855207	USP3	.	8	28	7	0.444444	0.201643
chr8	42780699	42798588	HOOK3	.	8	551	26	0.0276817	0.201643
chr11	8474368	8486369	STK33	.	0	0	0	0	0
chr11	120347369	120348235	ARHGEF12	.	14	5	435	0.0634921	0.352875
chr5	65284462	65290692	ERBIN	.	2	62	27	0.0444444	0.0504108
chr16	69404385	69406258	TERF2	.	5	13	8	0.454545	0.126027
chr6	74190397	74191967	MTO1	.	0	0	0	0	0
chr10	31661946	31676195	ZEB1	.	6	3	31	0.342857	0.151232
chr2	215632205	215646233	BARD1	.	4	12	103	0.0689655	0.100822
chr1	205585605	205593019	ELK4	.	7	1	3	2.8	0.176438
chr16	18846213	18856973	SMG1	.	0	0	0	0	0
chr15	85223943	85234875	SEC11A	.	5	88	251	0.0294118	0.126027
chr9	103082546	103111654	TEX10	.	0	0	0	0	0
chr7	33185853	33217203	BBS9	.	3	10	2	0.461538	0.0756162
chr6	10702601	10702872	PAK1IP1	.	8	129	60	0.0842105	0.201643
chr16	48587449	48596355	N4BP1	MIR548AE2	5	21	29	0.196078	0.126027
chr5	113740134	113740553	KCNN2	.	2	0	0	4	0.0504108
chr17	80521229	80529746	FOXK2	.	2	8	31	0.1	0.0504108
chr16	70598967	70601439	SF3B3	.	0	0	0	0	0
chrX	90669902	90673870	PABPC5-AS1	.	2	0	0	4	0.0504108
chr6	13632601	13644961	RANBP9	NOL7	5	35	1	0.27027	0.126027
chr12	1372199	1399178	ERC1	.	2	149	22	0.0232558	0.0504108
chr11	32611092	32617593	EIF3M	.	3	468	411	0.00681818	0.0756162
chr12	80187642	80215970	PPP1R12A	.	0	0	0	0	0
chr5	178312614	178358327	ZFP2	.	0	0	0	0	0
chr8	124349864	124351686	ATAD2	.	4	106	51	0.0506329	0.100822
chr4	103225473	103236987	SLC39A8	.	4	65	94	0.05	0.100822
chr19	5653125	5654467	SAFB	.	0	0	0	0	0
chr17	40652724	40653322	ATP6V0A1	.	0	0	0	0	0
chr9	88211276	88248289	AGTPBP1	.	0	0	0	0	0
chr8	22899553	22900756	TNFRSF10B	.	2	0	47	0.0833333	0.0504108
chr20	42331129	42331543	MYBL2	.	0	0	0	0	0
chr3	185638891	185641772	TRA2B	.	5	200	670	0.0114811	0.126027
chr6	52132662	52134024	MCM3	.	0	0	0	0	0
chr1	220179447	220180680	EPRS	RNU5F-1	3	249	231	0.012474	0.0756162
chr3	28051960	28070094	.	.	5	3	0	2.5	0.126027
chr1	35846859	35847359	ZMYM4	.	0	0	0	0	0
chr9	22046749	22097363	CDKN2B-AS1	.	3	23	0	0.25	0.0756162
chr5	179136873	179143295	CANX	.	0	0	0	0	0
chr11	77409531	77413540	RSF1	.	0	0	0	0	0
chr3	141228409	141248644	RASA2	.	0	0	0	0	0
chr15	101104896	101105470	.	.	4	0	1	4	0.100822
chrX	54013510	54014377	PHF8	.	0	0	0	0	0
chr7	127344892	127361454	SND1	.	0	0	0	0	0
chr11	85707868	85742653	PICALM	.	0	0	0	0	0
chr1	154197559	154209612	UBAP2L	.	0	0	0	0	0
chr12	1213915	1250953	ERC1	.	0	0	0	0	0
chr5	171482591	171484477	STK10	.	0	0	0	0	0
chr18	9182379	9216898	ANKRD12	.	0	0	0	0	0
chr7	91924202	91948826	ANKIB1	.	0	0	0	0	0
chr12	121858044	121861320	RNF34	.	0	0	0	0	0
chr1	176524542	176526377	PAPPA2	.	2	1	0	2	0.0504108
chr8	68005777	68024300	CSPP1	.	0	0	0	0	0
chr11	68334481	68343511	PPP6R3	.	0	0	0	0	0
chr17	40880842	40882936	EZH1	.	0	0	0	0	0
chr15	72283443	72302788	MYO9A	.	0	0	0	0	0
chr6	109232101	109258202	ARMC2	ARMC2-AS1	13	89	204	0.0884354	0.32767
chr10	5741487	5756170	FAM208B	.	10	0	39	0.5	0.252054
chrX	44383247	44386611	FUNDC1	.	6	0	57	0.206897	0.151232
chr1	52959282	52975384	ZCCHC11	.	7	44	42	0.16092	0.176438
chr6	92045595	92047935	.	.	7	0	1	7	0.176438
chr22	28910744	28915308	TTC28	.	11	0	2	7.33333	0.277259
chr10	15858833	15889942	FAM188A	.	3	36	5	0.142857	0.0756162
chr8	68044185	68049838	CSPP1	.	5	28	45	0.135135	0.126027
chrX	133607388	133627620	HPRT1	.	8	5	5	1.45455	0.201643
chr5	176370335	176385155	UIMC1	.	11	48	1	0.44	0.277259
chr10	22171210	22209892	DNAJC1	.	10	89	139	0.0873362	0.252054
chr9	33948371	33953472	UBAP2	.	5	58	14	0.136986	0.126027
chr8	142264087	142264728	SLC45A4	LOC105375787	7	2	0	4.66667	0.176438
chr1	187272597	187298192	LINC01036	.	0	0	0	0	0
chr14	31416295	31425448	STRN3	.	2	89	62	0.0263158	0.0504108
chr19	58772216	58775042	ZNF544	.	0	0	0	0	0
chr12	69218142	69222711	MDM2	.	6	1360	2397	0.00319319	0.151232
chr14	81223235	81244390	CEP128	.	7	64	32	0.14433	0.176438
chr20	34300940	34313077	RBM39	.	0	0	0	0	0
chr1	51032748	51061888	FAF1	.	3	83	80	0.0365854	0.0756162
chr9	103261046	103279053	MSANTD3	.	2	14	15	0.133333	0.0504108
chr9	37126308	37147442	ZCCHC7	.	0	0	0	0	0
chr2	200213423	200298237	SATB2	.	12	5	10	1.5	0.302465
chr4	54280781	54294350	FIP1L1	.	8	76	79	0.102564	0.201643
chr3	169889160	169896726	PHC3	.	0	0	0	0	0
chr7	127013395	127017383	ZNF800	.	6	5	60	0.181818	0.151232
chr21	37711076	37717005	MORC3	.	4	0	100	0.0792079	0.100822
chr20	43607083	43615937	STK4	.	6	131	73	0.0585366	0.151232
chrX	135323318	135326954	MAP7D3	.	0	0	0	0	0
chr20	47570092	47580435	ARFGEF2	.	3	188	12	0.0298507	0.0756162
chr15	89656955	89659752	ABHD2	.	2	100	78	0.0223464	0.0504108
chr15	49528047	49531564	GALK2	.	0	0	0	0	0
chr20	47691321	47707559	CSE1L	.	10	1099	785	0.0106101	0.252054
chr11	116627861	116629123	BUD13	.	10	15	179	0.102564	0.252054
chr17	35310185	35311207	AATF	.	0	0	0	0	0
chr13	96636057	96651561	UGGT2	.	3	20	4	0.24	0.0756162
chr19	24014398	24017206	.	.	10	59	4	0.3125	0.252054
chr8	48866179	48869991	PRKDC	.	2	121	31	0.0261438	0.0504108
chr11	117150623	117150975	RNF214	.	4	51	25	0.103896	0.100822
chr17	46189392	46190763	SNX11	.	8	9	6	1	0.201643
chr3	47651555	47719801	SMARCC1	.	0	0	0	0	0
chr15	93543741	93558139	CHD2	.	3	11	22	0.176471	0.0756162
chr1	174241551	174274265	RABGAP1L	.	0	0	0	0	0
chrX	79962925	79975155	BRWD3	.	0	0	0	0	0
chr5	70798425	70808255	BDP1	.	3	34	60	0.0631579	0.0756162
chr4	178274461	178281831	NEIL3	.	5	31	8	0.25	0.126027
chr12	32480394	32481489	BICD1	.	0	0	0	0	0
chr10	32740519	32762951	CCDC7	.	2	8	2	0.363636	0.0504108
chr10	70404454	70406762	TET1	.	0	0	0	0	0
chr5	14673750	14693203	OTULIN	.	0	0	0	0	0
chr2	61118817	61149134	REL	.	0	0	0	0	0
chr6	20546576	20548936	CDKAL1	.	9	38	70	0.165138	0.226848
chr1	162535801	162567648	UAP1	.	3	1807	1264	0.00195312	0.0756162
chr1	1747194	1770677	GNB1	.	10	81	12	0.212766	0.252054
chr20	62407030	62422143	ZBTB46	.	0	0	0	0	0
chr10	12123470	12162266	DHTKD1	.	3	4	13	0.333333	0.0756162
chr9	96233422	96261168	FAM120A	.	0	0	0	0	0
chr7	23224688	23226765	NUPL2	.	0	0	0	0	0
chr7	104714065	104717880	KMT2E	.	0	0	0	0	0
chr15	73064123	73067438	ADPGK	.	6	90	90	0.0662983	0.151232
chr1	21295966	21307720	EIF4G3	.	0	0	0	0	0
chr7	117825700	117828459	LSM8	.	5	3	172	0.0568182	0.126027
chr5	132227855	132228810	AFF4	.	3	28	79	0.0555556	0.0756162
chr2	70451685	70457986	TIA1	.	2	90	101	0.0208333	0.0504108
chr17	7402357	7402810	POLR2A	.	0	0	0	0	0
chr14	81405728	81408724	.	.	0	0	0	0	0
chr16	12060051	12061700	TNFRSF17	.	2	1374	27	0.00285307	0.0504108
chr7	156956503	156963144	UBE3C	.	0	0	0	0	0
chr4	83795763	83803093	SEC31A	.	0	0	0	0	0
chr1	168007608	168037701	DCAF6	.	2	250	132	0.0104439	0.0504108
chr11	34978930	35006275	PDHX	.	4	142	126	0.0297398	0.100822
chr4	106367539	106377902	PPA2	.	0	0	0	0	0
chr18	48444479	48458730	ME2	.	0	0	0	0	0
chr16	88008653	88017865	BANP	.	0	0	0	0	0
chr2	113057425	113089859	ZC3H6	.	0	0	0	0	0
chr2	48061717	48062010	FBXO11	.	4	6	92	0.0808081	0.100822
chr10	14938844	14939516	SUV39H2	.	2	38	112	0.0264901	0.0504108
chr8	119388020	119391939	SAMD12	.	0	0	0	0	0
chr2	85270686	85276771	KCMF1	.	8	76	143	0.0727273	0.201643
chr17	29483000	29497015	NF1	.	0	0	0	0	0
chr14	61275042	61346553	MNAT1	.	0	0	0	0	0
chr14	58785259	58796887	ARID4A	.	0	0	0	0	0
chr13	35883664	35926460	NBEA	.	2	43	46	0.0444444	0.0504108
chr11	118997644	118997835	HINFP	.	3	9	9	0.315789	0.0756162
chr9	78682870	78722267	PCSK5	.	0	0	0	0	0
chr10	27431315	27434519	YME1L1	.	3	119	70	0.0315789	0.0756162
chr1	213037066	213058738	FLVCR1	.	0	0	0	0	0
chr20	49551566	49571822	DPM1	ADNP-AS1	0	0	0	0	0
chr1	97235258	97250810	PTBP2	.	0	0	0	0	0
chr15	93543741	93552553	CHD2	.	0	0	0	0	0
chr4	10099334	10105610	WDR1	.	0	0	0	0	0
chr17	4186092	4210418	UBE2G1	.	3	122	52	0.0342857	0.0756162
chr8	98698895	98735263	MTDH	.	0	0	0	0	0
chr12	51173922	51203372	ATF1	.	0	0	0	0	0
chr3	171944660	171969331	FNDC3B	.	0	0	0	0	0
chr7	102957276	102960125	DNAJC2	.	0	0	0	0	0
chr6	130631011	130706381	.	SAMD3	0	0	0	0	0
chr22	29193064	29195141	XBP1	.	0	0	0	0	0
chr21	47768925	47769734	PCNT	.	0	0	0	0	0
chr8	48003023	48045390	.	.	0	0	0	0	0
chr5	41794104	41801172	OXCT1	.	0	0	0	0	0
chr2	209045468	209051785	C2orf80	.	0	0	0	0	0
chr15	43067332	43109295	TTBK2	.	0	0	0	0	0
chr3	125032151	125050082	ZNF148	.	18	88	77	0.216867	0.453697
chr11	34093272	34098189	CAPRIN1	.	7	121	300	0.0331754	0.176438
chr1	52981562	52992045	ZCCHC11	.	4	43	46	0.0888889	0.100822
chrX	53672262	53681075	HUWE1	.	4	91	135	0.0352423	0.100822
chr2	122363276	122363756	CLASP1	.	5	46	38	0.117647	0.126027
chr2	136432901	136437894	R3HDM1	.	8	116	77	0.0824742	0.201643
chr11	8435041	8486369	STK33	.	3	17	74	0.0652174	0.0756162
chr2	191765289	191789319	GLS	.	15	106	109	0.138889	0.378081
chr17	60061531	60062451	MED13	.	3	18	45	0.09375	0.0756162
chr9	127670655	127674305	GOLGA1	.	6	6	40	0.255319	0.151232
chr8	128902834	128903244	PVT1	.	9	7	18	0.692308	0.226848
chr6	87920168	87928449	ZNF292	.	4	0	10	0.727273	0.100822
chr2	64778576	64780543	AFTPH	.	5	44	20	0.153846	0.126027
chr6	158703294	158735300	.	.	3	7	7	0.4	0.0756162
chr7	38050522	38053183	.	.	0	0	0	0	0
chr12	116668237	116675510	MED13L	.	6	0	30	0.387097	0.151232
chr18	13048857	13059311	CEP192	.	9	68	3	0.25	0.226848
chr7	23650789	23651172	CCDC126	.	8	32	21	0.296296	0.201643
chr18	51804072	51813781	POLI	.	5	74	21	0.104167	0.126027
chr18	13048857	13073184	CEP192	.	4	68	12	0.0987654	0.100822
chr11	8457040	8486369	STK33	.	8	45	74	0.133333	0.201643
chr21	34614144	34625135	IFNAR2	.	5	7	81	0.11236	0.126027
chr10	117221450	117228839	ATRNL1	.	5	32	6	0.25641	0.126027
chr5	109152973	109159538	MAN2A1	.	6	140	406	0.0219378	0.151232
chr1	29068914	29070498	YTHDF2	.	0	0	0	0	0
chr1	151060665	151090615	GABPB2	.	9	53	2	0.321429	0.226848
chr8	71071739	71075089	NCOA2	.	6	67	20	0.136364	0.151232
chr5	14673750	14681716	OTULIN	.	0	0	0	0	0
chr8	68005777	68007967	CSPP1	.	4	87	17	0.0761905	0.100822
chr3	113207791	113225452	SPICE1	.	2	22	15	0.105263	0.0504108
chr12	1289705	1299218	ERC1	.	9	84	92	0.101695	0.226848
chr20	39721111	39729993	TOP1	PLCG1-AS1	4	25	67	0.0860215	0.100822
chr9	33996220	34017187	UBAP2	.	3	57	26	0.0714286	0.0756162
chr1	224599128	224601037	WDR26	.	0	0	0	0	0
chr2	100078957	100081447	REV1	.	4	27	1	0.275862	0.100822
chr10	15875628	15885271	FAM188A	.	0	0	0	0	0
chr8	37623043	37623873	PROSC	.	4	24	35	0.133333	0.100822
chr22	32874967	32881196	FBXO7	.	5	69	127	0.0507614	0.126027
chr6	42559888	42562042	UBR2	.	6	45	32	0.153846	0.151232
chr2	61749745	61761038	XPO1	.	6	53	66	0.1	0.151232
chr12	69983264	69987393	CCT2	.	5	630	600	0.00812348	0.126027
chr2	172782046	172844276	HAT1	.	3	125	385	0.0117417	0.0756162
chr2	62100136	62103369	CCT4	.	0	0	0	0	0
chr7	24663284	24690331	MPP6	.	0	0	0	0	0
chr14	64065473	64066691	WDR89	.	4	0	33	0.235294	0.100822
chr13	33091993	33101669	N4BP2L2	.	6	14	41	0.214286	0.151232
chr14	50616725	50616948	SOS2	.	0	0	0	0	0
chr7	17908029	17915413	SNX13	.	4	45	55	0.0792079	0.100822
chr1	110203786	110233186	GSTM2	.	6	0	0	12	0.151232
chr5	43675612	43704502	NNT	.	7	149	0	0.0933333	0.176438
chr9	88284399	88327481	AGTPBP1	.	4	6	3	0.8	0.100822
chr8	22332466	22370945	PPP3CC	.	4	203	839	0.00767018	0.100822
chr9	37126308	37127260	ZCCHC7	.	0	0	0	0	0
chr17	57808781	57851246	VMP1	.	4	106	50	0.0509554	0.100822
chr7	97820039	97823884	LMTK2	.	9	22	7	0.6	0.226848
chr12	27867712	27877119	MRPS35	.	2	52	212	0.0150943	0.0504108
chr14	81209418	81259454	CEP128	.	7	11	64	0.184211	0.176438
chr1	179972308	179975702	CEP350	.	5	121	95	0.0460829	0.126027
chr2	111423839	111427130	BUB1	.	4	509	114	0.0128205	0.100822
chr1	78267015	78280916	FAM73A	.	0	0	0	0	0
chr19	47767859	47768203	CCDC9	.	2	10	2	0.307692	0.0504108
chr19	38631823	38633350	SIPA1L3	.	0	0	0	0	0
chr2	136467002	136467801	R3HDM1	.	7	77	27	0.133333	0.176438
chr9	123593608	123595734	PSMD5	.	0	0	0	0	0
chr1	172525008	172539870	SUCO	.	4	20	187	0.0384615	0.100822
chr9	35295692	35313986	UNC13B	.	0	0	0	0	0
chr11	94219089	94224131	MRE11A	.	5	56	146	0.0492611	0.126027
chr6	17648037	17649531	NUP153	.	0	0	0	0	0
chr9	130106513	130107756	GARNL3	.	3	23	2	0.230769	0.0756162
chr8	37971709	37976881	ASH2L	.	3	29	14	0.136364	0.0756162
chr4	154315413	154318485	MND1	.	3	107	28	0.0441176	0.0756162
chr9	96233422	96238620	FAM120A	.	3	97	42	0.0428571	0.0756162
chr1	12335881	12338095	VPS13D	.	4	14	11	0.307692	0.100822
chr18	12999419	13030607	CEP192	.	0	0	0	0	0
chr10	105767934	105778666	SLK	.	2	173	85	0.015444	0.0504108
chr15	44620882	44673174	CASC4	.	0	0	0	0	0
chr9	77631183	77632364	CARNMT1	.	0	0	0	0	0
chr4	113483526	113506881	ZGRF1	.	0	0	0	0	0
chr1	21076215	21100103	HP1BP3	.	0	0	0	0	0
chr3	52238708	52240767	ALAS1	.	0	0	0	0	0
chr11	95546095	95552068	CEP57	.	0	0	0	0	0
chr20	34304661	34313077	RBM39	.	0	0	0	0	0
chr22	41568502	41569788	EP300	.	0	0	0	0	0
chr3	119219541	119232566	TIMMDC1	.	0	0	0	0	0
chr19	12825634	12826553	TNPO2	.	4	12	32	0.177778	0.100822
chr10	103552595	103570071	MGEA5	.	3	48	34	0.0722892	0.0756162
chr3	33725850	33731424	CLASP2	.	0	0	0	0	0
chr14	102661274	102676199	WDR20	.	0	0	0	0	0
chr2	69565029	69573131	GFPT1	.	0	0	0	0	0
chr8	38677039	38678153	TACC1	.	3	55	23	0.0759494	0.0756162
chr2	61710091	61717911	XPO1	.	0	0	0	0	0
chr15	50878588	50884823	TRPM7	.	0	0	0	0	0
chr9	33351557	33352717	NFX1	.	0	0	0	0	0
chrX	10031484	10066619	WWC3	.	0	0	0	0	0
chr7	103801519	103808973	ORC5	.	0	0	0	0	0
chr6	7895338	7904956	BLOC1S5-TXNDC5	.	0	0	0	0	0
chr6	18160113	18166609	KDM1B	.	0	0	0	0	0
chr4	106345352	106377902	PPA2	.	0	0	0	0	0
chr1	35846859	35854683	ZMYM4	.	0	0	0	0	0
chr12	69229608	69230529	MDM2	.	0	0	0	0	0
chr8	48955592	48962538	UBE2V2	.	2	81	101	0.0218579	0.0504108
chr3	49016914	49017929	ARIH2	.	0	0	0	0	0
chr2	17846769	17927218	SMC6	.	0	0	0	0	0
chr1	150997086	150998149	PRUNE	.	5	13	14	0.357143	0.126027
chr9	111819470	111826847	TMEM245	.	0	0	0	0	0
chr2	61505299	61508377	USP34	.	0	0	0	0	0
chr19	24015450	24015618	.	.	4	7	0	1	0.100822
chr7	138951078	138957186	UBN2	.	2	19	28	0.0833333	0.0504108
chr21	38792600	38802702	DYRK1A	.	0	0	0	0	0
chr20	47691321	47706283	CSE1L	.	0	0	0	0	0
chr13	26974589	26975761	CDK8	.	0	0	0	0	0
chr4	39739039	39779430	UBE2K	.	0	0	0	0	0
chr10	32308785	32310215	KIF5B	.	0	0	0	0	0
chrX	64295353	64295792	.	.	0	0	0	0	0
chr7	128845043	128846428	SMO	.	2	0	1	2	0.0504108
chr4	24572276	24578301	DHX15	.	0	0	0	0	0
chr5	118417268	118450236	DMXL1	.	0	0	0	0	0
chr3	152132729	152165562	MBNL1	.	0	0	0	0	0
chr22	25771779	25777545	LRP5L	.	0	0	0	0	0
chr18	56363597	56367823	MALT1	.	0	0	0	0	0
chr9	34241182	34242106	UBAP1	.	2	48	21	0.0571429	0.0504108
chr17	35931889	35945538	SYNRG	.	0	0	0	0	0
chr14	53622960	53656654	.	.	0	0	0	0	0
chr2	128520635	128528578	WDR33	.	2	106	29	0.0294118	0.0504108
chr17	60038227	60040332	MED13	.	2	55	99	0.0258065	0.0504108
chr6	64389900	64395812	PHF3	.	0	0	0	0	0
chr3	183435438	183446639	YEATS2	.	2	63	31	0.0421053	0.0504108
chr20	34450934	34459751	PHF20	.	0	0	0	0	0
chr1	244582061	244583598	ADSS	.	0	0	0	0	0
chr11	102701462	102703637	WTAPP1	.	0	0	0	0	0
chr10	74790028	74828741	P4HA1	.	0	0	0	0	0
chr18	2775731	2784619	SMCHD1	.	0	0	0	0	0
chr16	69395306	69402385	TERF2	.	0	0	0	0	0
chr1	231079551	231097049	TTC13	.	0	0	0	0	0
chr9	88925620	88934585	ZCCHC6	.	0	0	0	0	0
chr9	271626	289581	DOCK8	.	0	0	0	0	0
chr20	6077548	6078278	FERMT1	.	0	0	0	0	0
chr1	110125058	110129504	GNAI3	.	0	0	0	0	0
chr1	155408117	155408859	ASH1L	.	8	6	15	0.727273	0.201643
chr18	12999419	13019205	CEP192	.	0	0	0	0	0
chr18	48444479	48466756	ME2	.	8	822	1860	0.00596347	0.201643
chr2	48555699	48573890	FOXN2	.	9	16	30	0.382979	0.226848
chr1	45223227	45223812	KIF2C	.	7	155	78	0.0598291	0.176438
chr16	47143393	47165936	NETO2	.	9	30	19	0.36	0.226848
chr5	56160560	56161804	MAP3K1	.	8	46	34	0.197531	0.201643
chr18	74561481	74563895	ZNF236	.	6	0	13	0.857143	0.151232
chr11	32948702	32956981	QSER1	.	0	0	0	0	0
chr17	27613009	27614734	NUFIP2	.	3	21	215	0.0253165	0.0756162
chr2	99802639	99812219	MRPL30	.	2	135	7	0.027972	0.0504108
chr3	43341245	43345284	SNRK	.	11	1	32	0.647059	0.277259
chr1	92798947	92846430	RPAP2	.	5	11	6	0.555556	0.126027
chr11	119002244	119003929	HINFP	.	2	37	18	0.0714286	0.0504108
chr10	32197099	32199491	ARHGAP12	.	0	0	0	0	0
chr1	9991948	9994918	LZIC	.	0	0	0	0	0
chr16	70294946	70296427	AARS	.	7	119	190	0.0451613	0.176438
chr22	24698162	24709434	SPECC1L	.	3	21	80	0.0588235	0.0756162
chr11	108586605	108594189	DDX10	.	10	61	84	0.136986	0.252054
chr3	138289159	138291774	CEP70	.	4	38	9	0.166667	0.100822
chr11	70200406	70202360	PPFIA1	.	5	20	21	0.238095	0.126027
chr15	67524151	67529158	AAGAB	.	5	98	14	0.0884956	0.126027
chr10	126628942	126631876	.	.	0	0	0	0	0
chr6	108243000	108250718	SEC63	.	9	17	20	0.473684	0.226848
chr3	196817782	196846401	DLG1	.	2	103	60	0.0243902	0.0504108
chr17	35640167	35646430	ACACA	.	0	0	0	0	0
chr3	141228409	141259451	RASA2	.	0	0	0	0	0
chr3	52771601	52775515	NEK4	.	0	0	0	0	0
chr2	173435453	173460751	PDK1	.	8	340	26	0.0435967	0.201643
chr2	135010665	135012215	.	.	5	3	48	0.192308	0.126027
chr15	93467550	93472321	CHD2	.	7	37	90	0.109375	0.176438
chr10	7409610	7412337	SFMBT2	.	0	0	0	0	0
chr9	98740342	98766983	ERCC6L2	.	10	16	13	0.666667	0.252054
chr8	101299728	101300495	RNF19A	.	9	140	78	0.0821918	0.226848
chr8	42819453	42873637	HOOK3	.	0	0	0	0	0
chr4	106613132	106614643	INTS12	.	3	39	115	0.0387097	0.0756162
chr2	190593385	190609514	ANKAR	.	5	0	0	10	0.126027
chr6	161455290	161471011	MAP3K4	.	5	3	19	0.434783	0.126027
chr6	90052042	90053475	UBE2J1	.	3	1635	830	0.00243309	0.0756162
chr6	87925620	87943245	ZNF292	.	6	13	7	0.571429	0.151232
chr14	93760203	93762503	BTBD7	.	2	11	8	0.2	0.0504108
chr1	156286956	156287338	CCT3	.	6	1357	2216	0.00335758	0.151232
chr9	88190229	88261333	AGTPBP1	.	3	14	46	0.0983607	0.0756162
chr6	109249290	109258202	ARMC2	.	2	46	204	0.0159363	0.0504108
chr11	118422500	118430579	IFT46	.	5	37	57	0.105263	0.126027
chr18	48702264	48703946	MEX3C	.	5	0	30	0.322581	0.126027
chr10	225933	295028	ZMYND11	.	3	17	36	0.111111	0.0756162
chr18	39607406	39629569	PIK3C3	.	0	0	0	0	0
chr7	73100965	73101425	WBSCR22	.	3	32	74	0.0560748	0.0756162
chr1	180953812	180962561	STX6	.	3	13	23	0.162162	0.0756162
chr14	61262934	61285565	MNAT1	.	8	124	174	0.0535117	0.201643
chr1	155365249	155429689	ASH1L	POU5F1P4	2	38	86	0.032	0.0504108
chr1	150202905	150204264	ANP32E	.	3	821	131	0.00629591	0.0756162
chr3	47466974	47470160	SCAP	.	5	12	43	0.178571	0.126027
chr19	5604593	5604947	SAFB2	.	4	31	22	0.148148	0.100822
chr6	108225832	108246136	SEC63	.	0	0	0	0	0
chr17	40879652	40882936	EZH1	.	0	0	0	0	0
chr15	91524113	91525211	PRC1	PRC1-AS1	2	97	148	0.0162602	0.0504108
chr12	89853414	89866052	POC1B	.	0	0	0	0	0
chr13	78293666	78327493	SLAIN1	.	0	0	0	0	0
chr5	142779220	142780417	NR3C1	.	0	0	0	0	0
chr11	107916996	107925682	CUL5	.	10	69	166	0.0847458	0.252054
chr9	110062421	110087285	RAD23B	.	0	0	0	0	0
chr4	88104354	88116842	KLHL8	.	0	0	0	0	0
chr17	76187050	76188866	AFMID	.	3	43	0	0.136364	0.0756162
chr17	49340634	49346265	UTP18	.	0	0	0	0	0
chr3	3819408	3830758	.	.	4	0	0	8	0.100822
chr2	190670377	190682906	PMS1	.	4	72	30	0.0776699	0.100822
chrX	72797242	72804408	CHIC1	.	0	0	0	0	0
chr11	6962801	6977013	ZNF215	.	3	24	13	0.157895	0.0756162
chr11	68318588	68331900	PPP6R3	.	0	0	0	0	0
chr15	41036244	41037457	RMDN3	.	0	0	0	0	0
chr14	81329100	81366373	CEP128	.	5	128	52	0.0552486	0.126027
chr15	72338064	72338975	MYO9A	.	4	7	14	0.363636	0.100822
chr7	77407654	77408131	RSBN1L	.	0	0	0	0	0
chr1	230313963	230339036	GALNT2	.	0	0	0	0	0
chr5	38991050	39021238	RICTOR	.	2	42	8	0.0784314	0.0504108
chr19	8520288	8539128	HNRNPM	.	6	68	195	0.0454545	0.151232
chr11	85961337	85967554	EED	.	4	71	40	0.0714286	0.100822
chr10	120488806	120489922	CACUL1	.	0	0	0	0	0
chr10	116879948	116931050	ATRNL1	.	0	0	0	0	0
chr1	149931602	149936274	OTUD7B	.	0	0	0	0	0
chr10	114286845	114298089	VTI1A	.	0	0	0	0	0
chr2	55559701	55562300	CCDC88A	.	0	0	0	0	0
chr4	54292038	54310270	FIP1L1	.	0	0	0	0	0
chr5	14741935	14758707	ANKH	.	2	6	33	0.1	0.0504108
chr14	31404368	31425448	STRN3	.	0	0	0	0	0
chr6	82900789	82914675	IBTK	.	0	0	0	0	0
chr9	33293677	33295425	NFX1	.	3	5	50	0.107143	0.0756162
chr20	35651052	35684059	RBL1	.	2	51	90	0.028169	0.0504108
chr5	619104	620376	CEP72	.	2	11	6	0.222222	0.0504108
chr9	5968018	5988545	KIAA2026	.	0	0	0	0	0
chr7	27824781	27839709	TAX1BP1	.	0	0	0	0	0
chr21	40619626	40630598	BRWD1	.	0	0	0	0	0
chr17	80842020	80861354	TBCD	.	3	12	7	0.3	0.0756162
chr16	67644726	67646024	CTCF	.	0	0	0	0	0
chr1	162535801	162570693	UAP1	.	0	0	0	0	0
chrX	64271341	64295792	.	.	0	0	0	0	0
chr7	18705835	18706099	HDAC9	.	0	0	0	0	0
chr3	56694758	56707753	FAM208A	.	2	35	8	0.0909091	0.0504108
chr2	240929490	240954277	NDUFA10	.	0	0	0	0	0
chr2	160602280	160605414	MARCH7	.	0	0	0	0	0
chr18	42281139	42283072	SETBP1	.	0	0	0	0	0
chr6	137015277	137019820	MAP3K5	.	2	34	1	0.111111	0.0504108
chr8	101281012	101300495	RNF19A	.	0	0	0	0	0
chr6	47251673	47254331	TNFRSF21	.	0	0	0	0	0
chr11	124517260	124518071	SIAE	.	0	0	0	0	0
chr6	90916287	90981660	BACH2	.	0	0	0	0	0
chr15	79748439	79761487	KIAA1024	.	0	0	0	0	0
chr7	102944288	102944937	PMPCB	.	0	0	0	0	0
chr3	141231004	141259451	RASA2	.	0	0	0	0	0
chr1	202724398	202733273	KDM5B	.	0	0	0	0	0
chr8	101271334	101300495	RNF19A	.	0	0	0	0	0
chr6	76368977	76388643	SENP6	.	2	74	163	0.0168067	0.0504108
chr3	172013152	172028671	FNDC3B	.	0	0	0	0	0
chr7	91924202	91957214	ANKIB1	.	5	32	43	0.131579	0.126027
chr19	11223953	11224438	LDLR	.	0	0	0	0	0
chr12	1345934	1399178	ERC1	.	0	0	0	0	0
chr3	101535638	101540594	NXPE3	.	3	161	0	0.037037	0.0756162
chr20	42331129	42333998	MYBL2	.	2	124	124	0.0160643	0.0504108
chr20	33954359	33971936	UQCC1	.	0	0	0	0	0
chr12	112513481	112516545	NAA25	.	0	0	0	0	0
chr2	210968827	211019335	KANSL1L	.	2	12	0	0.307692	0.0504108
chr9	140458885	140459606	DPH7	.	0	0	0	0	0
chr7	122047593	122056218	CADPS2	.	0	0	0	0	0
chr18	60223435	60232329	ZCCHC2	.	3	28	54	0.0722892	0.0756162
chr11	34978930	34999729	PDHX	.	0	0	0	0	0
chr18	39595439	39609405	PIK3C3	.	0	0	0	0	0
chr12	124856567	124862930	NCOR2	.	0	0	0	0	0
chr7	97820925	97823884	LMTK2	.	0	0	0	0	0
chr6	110048311	110064975	FIG4	.	0	0	0	0	0
chr14	39620949	39628754	TRAPPC6B	.	0	0	0	0	0
chr7	152007050	152055760	KMT2C	.	0	0	0	0	0
chr5	151169883	151170623	G3BP1	.	0	0	0	0	0
chr8	98673299	98718978	MTDH	.	5	1395	1555	0.00338868	0.126027
chr5	176468126	176477937	ZNF346	.	0	0	0	0	0
chr20	25394425	25405963	GINS1	.	0	0	0	0	0
chr19	32847521	32851524	ZNF507	.	0	0	0	0	0
chr18	72997402	73000603	TSHZ1	.	0	0	0	0	0
chr14	89178614	89181539	EML5	.	4	1	14	0.5	0.100822
chr9	123230137	123253755	CDK5RAP2	.	0	0	0	0	0
chr6	142487364	142510671	VTA1	.	0	0	0	0	0
chrX	109263579	109352374	TMEM164	.	0	0	0	0	0
chr9	130947825	130950213	CIZ1	.	0	0	0	0	0
chr8	34030494	34042423	.	.	2	10	14	0.16	0.0504108
chr6	56416981	56479282	DST	.	0	0	0	0	0
chr2	175976295	175986268	ATF2	.	0	0	0	0	0
chr19	11230767	11231198	LDLR	.	0	0	0	0	0
chr17	49048067	49064598	SPAG9	.	0	0	0	0	0
chr1	219366423	219414650	.	.	0	0	0	0	0
chr1	10380100	10384953	KIF1B	.	0	0	0	0	0
chr2	15629017	15651474	NBAS	.	0	0	0	0	0
chr17	49057106	49064598	SPAG9	.	0	0	0	0	0
chr20	40141484	40162209	CHD6	.	0	0	0	0	0
chr7	131060182	131084192	MKLN1	.	0	0	0	0	0
chr1	51121113	51210447	FAF1	.	0	0	0	0	0
chr11	120317111	120330029	ARHGEF12	.	0	0	0	0	0
chr9	99220660	99220823	HABP4	.	0	0	0	0	0
chr7	143080248	143080415	ZYX	.	6	0	9	1.2	0.151232
chr5	64747301	64769779	ADAMTS6	.	2	0	1	2	0.0504108
chr5	156945830	156947039	ADAM19	.	0	0	0	0	0
chr2	196544755	196548630	SLC39A10	.	0	0	0	0	0
chr1	235316020	235318427	RBM34	.	0	0	0	0	0
chr1	1735857	1756938	GNB1	.	0	0	0	0	0
chr11	18010143	18029623	SERGEF	.	3	10	6	0.352941	0.0756162
chr3	196612021	196613565	SENP5	.	0	0	0	0	0
chr2	38201182	38231359	RMDN2	RMDN2-AS1	0	0	0	0	0
chr3	179418795	179426745	USP13	.	2	31	11	0.0930233	0.0504108
chr3	160131260	160141628	SMC4	.	0	0	0	0	0
chr18	19345732	19371518	MIB1	.	0	0	0	0	0
chr1	77620133	77635080	PIGK	.	3	23	57	0.0740741	0.0756162
chr16	75425277	75448593	CFDP1	.	0	0	0	0	0
chr15	49528047	49584734	GALK2	.	0	0	0	0	0
chr3	169840378	169847340	PHC3	.	0	0	0	0	0
chr3	133876964	133914026	RYK	.	0	0	0	0	0
chr17	61841375	61843554	CCDC47	.	0	0	0	0	0
chr1	155686796	155695810	DAP3	.	4	121	185	0.0260586	0.100822
chr11	116734383	116744352	SIK3	.	4	40	26	0.119403	0.100822
chr3	12976947	12983365	IQSEC1	.	0	0	0	0	0
chr15	77046148	77067458	SCAPER	.	0	0	0	0	0
chr8	98698895	98725997	MTDH	.	0	0	0	0	0
chr4	128842678	128861152	MFSD8	.	0	0	0	0	0
chr3	178626309	178632350	.	.	0	0	0	0	0
chr2	55785910	55816092	PPP4R3B	.	0	0	0	0	0
chr21	10985044	10998332	.	.	0	0	0	0	0
chr19	45766370	45766625	MARK4	.	0	0	0	0	0
chr18	34740162	34753044	KIAA1328	.	0	0	0	0	0
chr15	41988272	42021547	MGA	.	0	0	0	0	0
chr1	25551492	25554726	SYF2	.	0	0	0	0	0
chr1	150416726	150418877	RPRD2	.	2	110	84	0.0205128	0.0504108
chr11	108178623	108188248	ATM	.	0	0	0	0	0
chr10	70506917	70513834	CCAR1	.	0	0	0	0	0
chr10	66046225	66061412	.	.	0	0	0	0	0
chr10	38064271	38065503	.	.	0	0	0	0	0
chrX	67731690	67742759	YIPF6	.	0	0	0	0	0
chrX	62875373	62898452	ARHGEF9	.	0	0	0	0	0
chr9	133485340	133495845	FUBP3	.	0	0	0	0	0
chr9	125932180	125936121	STRBP	.	0	0	0	0	0
chr8	48746756	48752750	PRKDC	.	0	0	0	0	0
chr8	131172109	131193126	ASAP1	.	0	0	0	0	0
chr7	72951551	72957974	BCL7B	.	0	0	0	0	0
chr6	90082155	90097115	RRAGD	.	0	0	0	0	0
chr6	57072425	57075243	RAB23	.	0	0	0	0	0
chr6	111726672	111795682	REV3L	.	0	0	0	0	0
chr6	111632271	111652987	REV3L	.	0	0	0	0	0
chr4	187070326	187088416	FAM149A	.	0	0	0	0	0
chr4	151719232	151738409	LRBA	.	0	0	0	0	0
chr4	11330174	11339043	.	.	0	0	0	0	0
chr4	10447449	10447882	.	ZNF518B	0	0	0	0	0
chr3	52661288	52677359	PBRM1	.	0	0	0	0	0
chr3	49717347	49717550	.	APEH	0	0	0	0	0
chr2	47635599	47710111	MSH2	.	0	0	0	0	0
chr2	44204293	44216829	LRPPRC	.	0	0	0	0	0
chr2	206992520	207009750	NDUFS1	.	0	0	0	0	0
chr19	2438160	2438529	LMNB2	.	0	0	0	0	0
chr18	44407921	44409830	PIAS2	.	0	0	0	0	0
chr18	3534191	3582246	DLGAP1	.	0	0	0	0	0
chr17	35830503	35837130	TADA2A	.	0	0	0	0	0
chr17	2929301	2930364	RAP1GAP2	.	0	0	0	0	0
chr1	69550862	69554245	.	.	0	0	0	0	0
chr16	4484384	4487486	DNAJA3	.	0	0	0	0	0
chr1	5987708	6046387	NPHP4	.	0	0	0	0	0
chr14	81223235	81259454	CEP128	.	0	0	0	0	0
chr14	23375403	23378804	RBM23	.	0	0	0	0	0
chr13	100959445	100992513	PCCA	.	0	0	0	0	0
chr12	94804396	94806367	CEP83	.	0	0	0	0	0
chr1	197611840	197621445	DENND1B	.	0	0	0	0	0
chr11	76158113	76159724	EMSY	.	0	0	0	0	0
chr11	108204615	108205768	ATM	.	0	0	0	0	0
chr10	94396940	94410274	KIF11	.	0	0	0	0	0
chr10	75302560	75302889	USP54	.	0	0	0	0	0
chr10	12160747	12162266	DHTKD1	.	0	0	0	0	0
chr9	128419929	128434922	MAPKAP1	.	16	194	94	0.110727	0.403286
chr12	69214104	69222711	MDM2	.	8	750	2397	0.00508259	0.201643
chr13	113170753	113181798	TUBGCP3	.	3	1	10	0.5	0.0756162
chr8	98725889	98735263	MTDH	.	4	1560	5001	0.00121914	0.100822
chr17	71231614	71233134	C17orf80	.	6	57	29	0.137931	0.151232
chr14	21971315	21972024	METTL3	.	14	54	5	0.466667	0.352875
chr5	6604250	6605521	NSUN2	.	6	81	299	0.0314961	0.151232
chr2	128750760	128754065	SAP130	.	7	23	14	0.368421	0.176438
chr14	81362061	81372425	CEP128	.	2	56	81	0.0289855	0.0504108
chr8	52758220	52773806	PCMTD1	.	6	36	25	0.193548	0.151232
chr4	1905942	1941505	WHSC1	.	3	191	395	0.0102215	0.0756162
chr1	150464886	150469384	TARS2	.	0	0	0	0	0
chr4	4650703	4651269	STX18-AS1	.	0	0	0	0	0
chr2	10740978	10747437	NOL10	.	4	60	135	0.0408163	0.100822
chr1	155385534	155429689	ASH1L	POU5F1P4	8	44	86	0.122137	0.201643
chr3	171969049	171979873	FNDC3B	.	5	368	0	0.0271003	0.126027
chr10	12039670	12056183	UPF2	.	6	31	33	0.184615	0.151232
chr5	53839008	53843428	SNX18	.	2	122	1	0.0322581	0.0504108
chr8	37734626	37735069	RAB11FIP1	.	4	67	44	0.0714286	0.100822
chr1	172520651	172526934	SUCO	.	4	24	233	0.0310078	0.100822
chr4	1932352	1941505	WHSC1	.	6	1361	395	0.00682982	0.151232
chr8	61484604	61504528	RAB2A	.	4	316	157	0.0168776	0.100822
chr2	203329531	203332412	BMPR2	.	3	25	38	0.09375	0.0756162
chr9	138741982	138774924	CAMSAP1	.	6	22	21	0.272727	0.151232
chr1	184701970	184706845	EDEM3	.	6	1549	123	0.00717274	0.151232
chr8	37727937	37735069	RAB11FIP1	.	0	0	0	0	0
chr8	52744003	52773806	PCMTD1	.	0	0	0	0	0
chr3	169854206	169867032	PHC3	.	2	34	62	0.0412371	0.0504108
chr1	243579003	243589860	SDCCAG8	.	3	21	8	0.2	0.0756162
chr4	39739039	39757359	UBE2K	.	4	76	42	0.0672269	0.100822
chr6	17624791	17649531	NUP153	.	2	42	111	0.025974	0.0504108
chr14	80944596	80997230	CEP128	.	0	0	0	0	0
chr13	33109905	33111164	N4BP2L2	.	3	41	157	0.0301508	0.0756162
chr7	22330793	22357656	RAPGEF5	.	4	3	3	1.14286	0.100822
chr14	81329100	81372425	CEP128	.	5	128	81	0.047619	0.126027
chr2	173423435	173429801	PDK1	.	3	145	515	0.00907716	0.0756162
chr3	136183722	136221621	STAG1	.	0	0	0	0	0
chr3	63898263	63898901	ATXN7	.	11	11	1	1.69231	0.277259
chr14	92592465	92609638	CPSF2	.	2	1	197	0.0201005	0.0504108
chr7	155457868	155473602	RBM33	.	3	10	44	0.109091	0.0756162
chr3	169831147	169840532	PHC3	.	3	21	22	0.136364	0.0756162
chr8	42828431	42841938	HOOK3	.	0	0	0	0	0
chr3	98502406	98512636	ST3GAL6	.	0	0	0	0	0
chr20	30904020	30904677	KIF3B	.	3	83	162	0.0243902	0.0756162
chr20	43600718	43625947	STK4	.	4	57	92	0.0533333	0.100822
chr3	101389973	101391057	ZBTB11	.	0	0	0	0	0
chr1	147805338	147808043	NBPF8	.	2	0	3	1	0.0504108
chr8	135612678	135622898	ZFAT	ZFAT-AS1	6	40	7	0.25	0.151232
chr8	103850971	103855975	AZIN1	.	2	595	314	0.0043956	0.0504108
chr3	128514202	128526514	RAB7A	.	0	0	0	0	0
chr18	59888269	59899660	KIAA1468	.	0	0	0	0	0
chr7	77378740	77394949	RSBN1L	.	0	0	0	0	0
chr1	21097422	21100103	HP1BP3	.	5	75	92	0.0595238	0.126027
chr10	15863654	15885271	FAM188A	.	5	14	47	0.16129	0.126027
chr3	169694733	169706147	SEC62	.	0	0	0	0	0
chr15	65471271	65472542	CLPX	.	3	33	52	0.0697674	0.0756162
chr9	35236465	35243361	UNC13B	.	0	0	0	0	0
chr1	33413822	33415375	RNF19B	.	0	0	0	0	0
chr6	139264649	139265759	REPS1	.	3	14	17	0.1875	0.0756162
chr2	99786012	99787892	MITD1	.	6	4	22	0.444444	0.151232
chrX	130498722	130503026	.	.	3	0	0	6	0.0756162
chr2	197777605	197787849	PGAP1	.	3	0	0	6	0.0756162
chr1	162535801	162560301	UAP1	.	2	1807	1005	0.00142197	0.0504108
chr6	116966876	116980087	ZUFSP	.	3	16	44	0.0983607	0.0756162
chr14	56078736	56086030	KTN1	.	3	26	172	0.0301508	0.0756162
chr16	81385187	81411307	GAN	.	2	14	0	0.266667	0.0504108
chr16	85667519	85667738	GSE1	.	4	4	1	1.33333	0.100822
chr8	28866588	28876430	HMBOX1	.	0	0	0	0	0
chr11	85707868	85714494	PICALM	.	6	40	22	0.190476	0.151232
chr10	104117795	104119192	GBF1	.	2	101	50	0.0263158	0.0504108
chr11	92085261	92088570	FAT3	.	0	0	0	0	0
chr10	31661946	31750166	ZEB1	.	4	3	12	0.5	0.100822
chr8	42761315	42829337	HOOK3	.	4	131	130	0.0305344	0.100822
chr2	173429230	173460751	PDK1	.	5	387	26	0.0241546	0.126027
chr15	91519905	91525211	PRC1	PRC1-AS1	0	0	0	0	0
chr4	2659529	2674099	FAM193A	.	3	35	17	0.113208	0.0756162
chr16	17352844	17353355	XYLT1	.	6	45	37	0.144578	0.151232
chr3	27958264	27972446	.	.	2	0	2	1.33333	0.0504108
chr13	33306237	33309467	PDS5B	.	3	7	26	0.176471	0.0756162
chr4	2951660	2955372	NOP14	NOP14-AS1	2	199	100	0.0133333	0.0504108
chr20	34241449	34246936	CPNE1	.	4	0	192	0.0414508	0.100822
chr20	49558567	49571822	DPM1	ADNP-AS1	0	0	0	0	0
chr11	94178975	94180604	MRE11A	.	3	125	30	0.0384615	0.0756162
chr1	168007608	168014465	DCAF6	.	2	250	342	0.00674536	0.0504108
chr2	64083439	64085070	UGP2	.	0	0	0	0	0
chr9	33948371	33956144	UBAP2	.	0	0	0	0	0
chr4	3088665	3109150	HTT	.	0	0	0	0	0
chr9	33986757	34017187	UBAP2	.	0	0	0	0	0
chr14	73614502	73640415	PSEN1	.	3	67	52	0.05	0.0756162
chr6	76412360	76412788	SENP6	.	0	0	0	0	0
chr4	88116475	88116842	KLHL8	.	0	0	0	0	0
chr10	3160973	3162236	PFKP	.	0	0	0	0	0
chr11	18312988	18314523	HPS5	.	0	0	0	0	0
chr14	73181130	73198642	DPF3	.	3	67	64	0.0454545	0.0756162
chr7	100410368	100410830	EPHB4	.	2	2	8	0.363636	0.0504108
chr3	188844845	188850486	.	.	3	5	2	0.75	0.0756162
chr12	112116954	112121111	BRAP	.	0	0	0	0	0
chrX	16846216	16847893	TXLNG	.	0	0	0	0	0
chr3	169854206	169896726	PHC3	.	0	0	0	0	0
chr1	176050287	176105683	RFWD2	.	2	50	27	0.0512821	0.0504108
chr8	67986477	67988816	CSPP1	.	0	0	0	0	0
chr6	7884591	7889081	BLOC1S5-TXNDC5	.	0	0	0	0	0
chr5	74109664	74137504	FAM169A	.	4	16	6	0.347826	0.100822
chr15	66044716	66053776	DENND4A	.	5	28	6	0.285714	0.126027
chr5	122868262	122893258	CSNK1G3	.	2	0	86	0.045977	0.0504108
chr5	133534776	133541822	PPP2CA	.	0	0	0	0	0
chr19	18258252	18258434	MAST3	.	0	0	0	0	0
chr4	25128885	25160729	SEPSECS	.	0	0	0	0	0
chr5	147468916	147473305	.	SPINK5	0	0	0	0	0
chr8	17829837	17830196	PCM1	.	4	284	180	0.0172043	0.100822
chr7	65592690	65599361	CRCP	.	0	0	0	0	0
chr2	44428324	44436466	PPM1B	.	0	0	0	0	0
chr1	91382196	91447927	ZNF644	.	0	0	0	0	0
chr18	76953182	76974038	ATP9B	.	0	0	0	0	0
chr1	145646114	145663367	NBPF20	.	0	0	0	0	0
chr10	102683734	102685776	SLF2	.	0	0	0	0	0
chr2	128747137	128754065	SAP130	.	0	0	0	0	0
chr22	24698162	24743144	SPECC1L	.	0	0	0	0	0
chr3	129546645	129551669	TMCC1	.	0	0	0	0	0
chr7	33397466	33427756	BBS9	.	0	0	0	0	0
chr5	96349351	96364316	LNPEP	.	0	0	0	0	0
[truncated: 5,389 more rows]

## Sheet: PR+DNMTi
chrom	start	end	sense_gene	antisense_gene	Pom +AZA junction	SA	SD	Pom +AZA CTL	Pom +AZA RPM
[truncated: 6,368 more rows]

[truncated: 3 more sheets: PR+HDACi, PR+EZH2i, PR+DNMTi+EZH2i]
